# Supplementary material
Source: publisher figshare collection journal article supplement (https://gsajournals.figshare.com/articles/dataset/_/14995326)

**cluster\_1, 6552 transcripts**

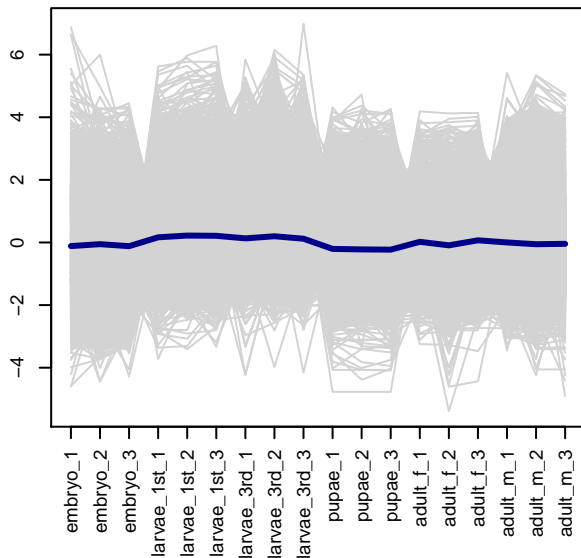

**cluster\_2, 361 transcripts**

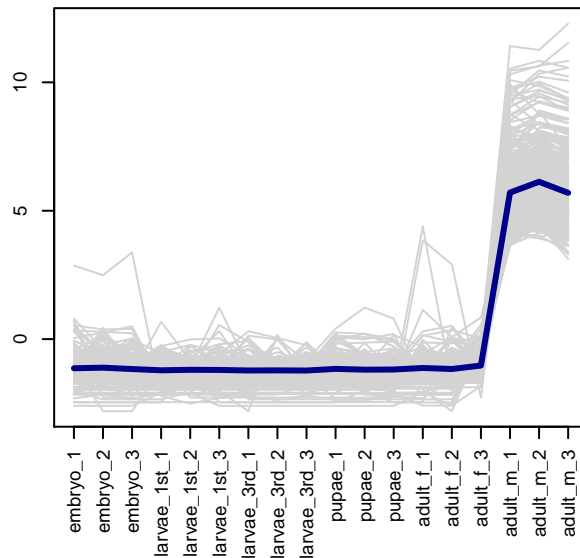

**cluster\_3, 813 transcripts**

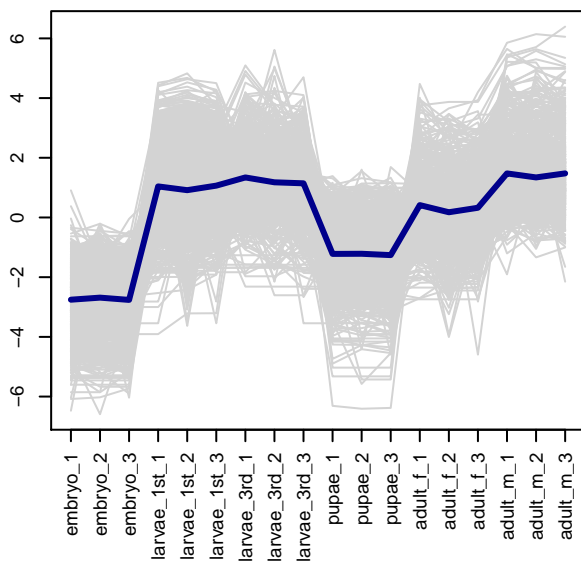

**cluster\_4, 142 transcripts**

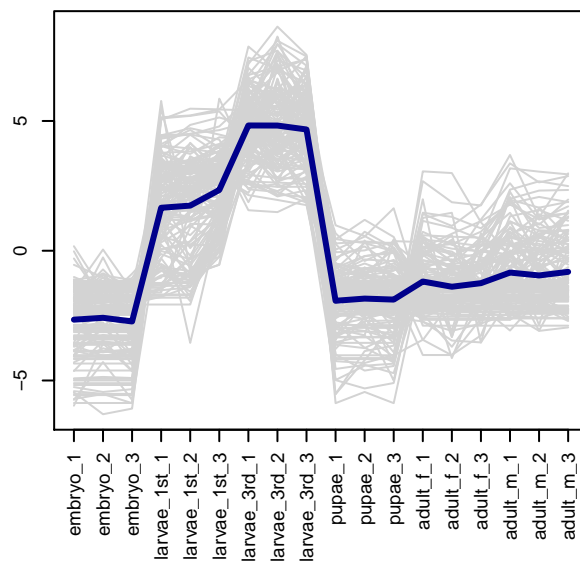

**cluster\_5, 1293 transcripts**

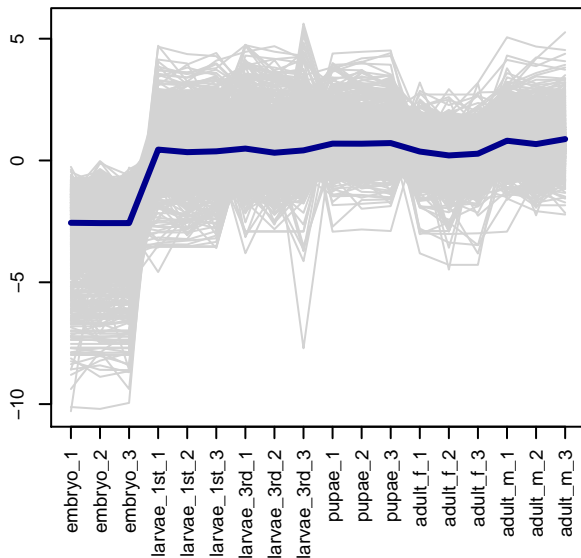

**cluster\_6, 115 transcripts**

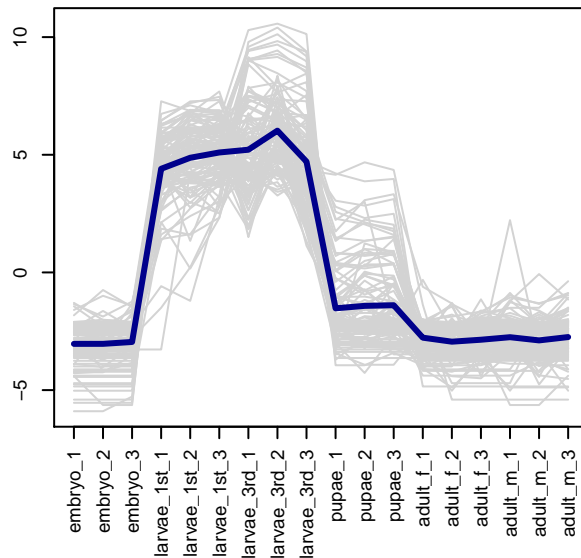

**cluster\_7, 144 transcripts**

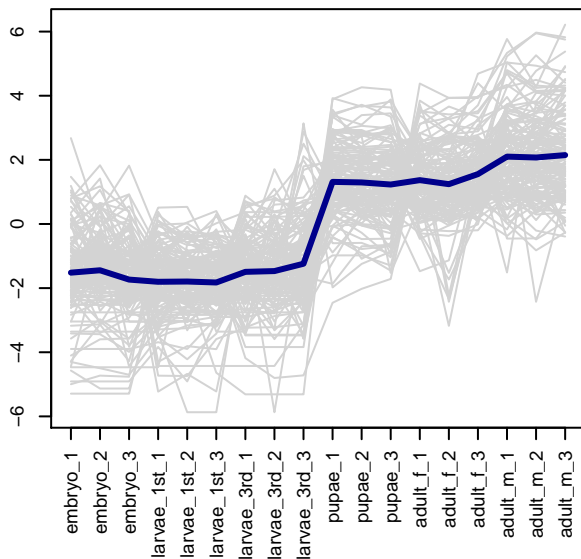

**cluster\_8, 97 transcripts**

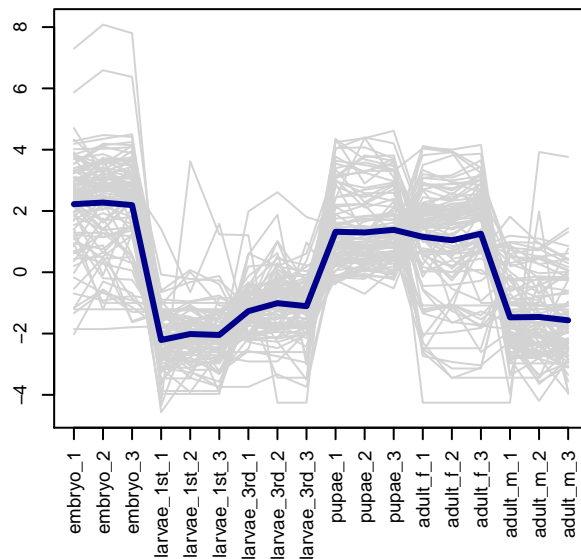

**cluster\_9, 45 transcripts**

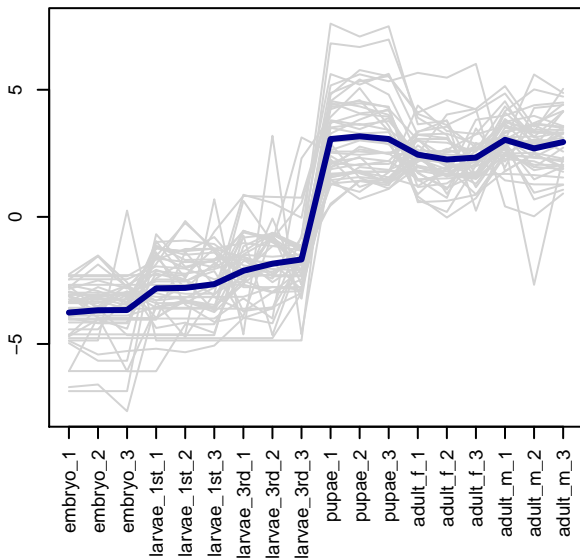

**cluster\_10, 87 transcripts**

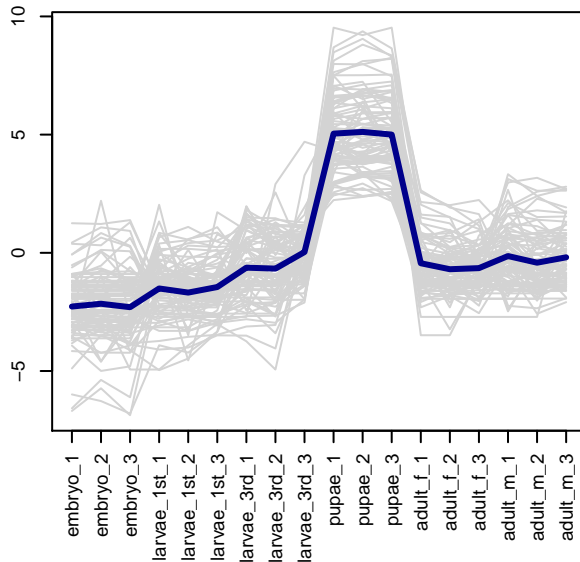

**cluster\_11, 95 transcripts**

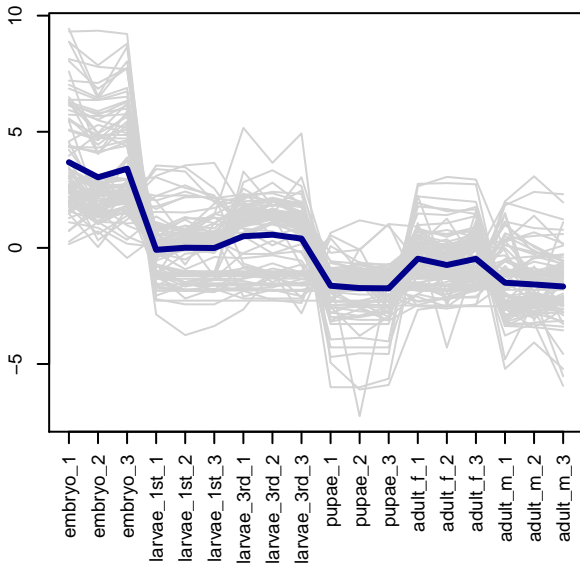

**cluster\_12, 94 transcripts**

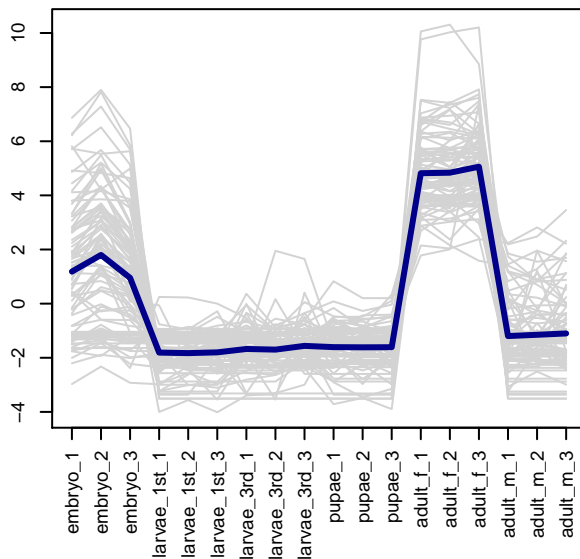

cluster\_13, 27 transcripts

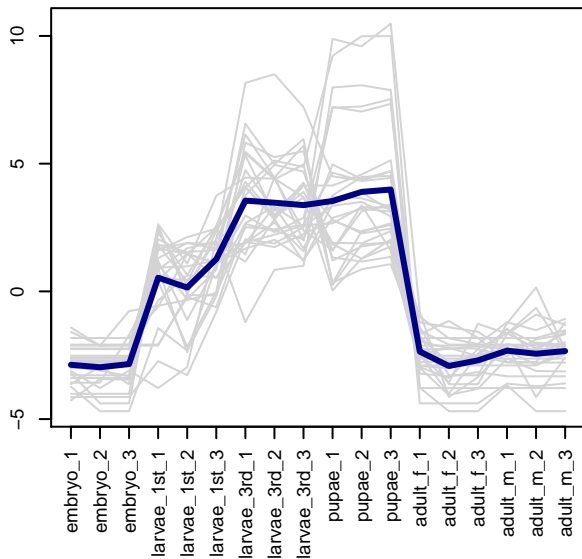

cluster\_14, 31 transcripts

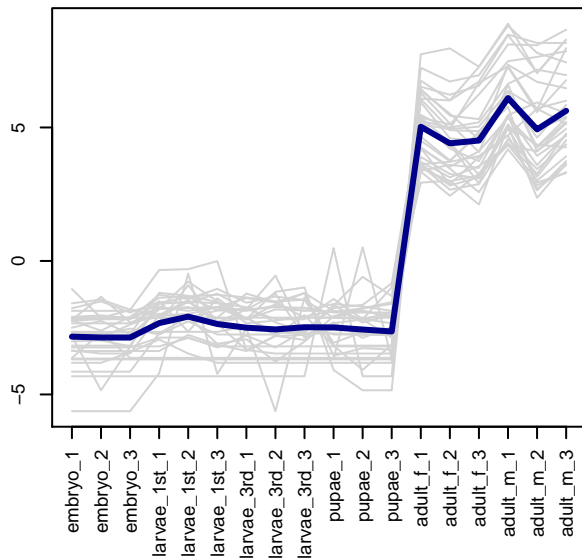

Supplement: Supplementary file 2 [file 1]
