# Supplementary material
Source: publisher figshare collection journal article supplement (https://gsajournals.figshare.com/articles/dataset/_/14995326)
Supplement: Supplementary file 1 [file 1]

## Sheet: Table S6
Table S6: Raw read counts matrix of isoforms in the different samples.
	embryo	embryo	embryo	1st instar larva	1st instar larva	1st instar larva	3rd instar larva	3rd instar larva	3rd instar larva	pupa	pupa	pupa	female adult	female adult	female adult	male adult	male adult	male adult
	NR01	NR02	NR03	NR04	NR05	NR06	NR07	NR08	NR09	NR10	NR11	NR12	NR13	NR14	NR15	NR16	NR17	NR18
maker-tulip_contig_807_pilon_pilon-augustus-gene-2.26-mRNA-1	71.00	73.00	82.00	86.00	80.00	74.00	63.00	40.00	51.00	86.00	73.00	77.00	240.00	27.00	156.00	80.00	30.00	67.00
augustus_masked-tulip_contig_753_pilon_pilon-processed-gene-0.2-mRNA-1	0.00	0.00	1.00	571.00	417.00	766.00	1659.00	507.00	314.00	214.00	220.00	231.00	302.00	18.00	43.00	122.00	20.00	101.00
maker-tulip_contig_691_pilon_pilon-augustus-gene-3.0-mRNA-1	73.63	71.41	93.21	126.65	159.99	133.47	162.26	81.74	82.08	218.58	178.98	227.41	416.74	61.51	201.19	161.48	67.49	168.30
maker-tulip_contig_147_pilon_pilon-augustus-gene-0.45-mRNA-1	9.00	4.00	7.00	34.00	27.00	30.00	44.00	24.00	12.00	49.00	23.00	27.00	84.00	5.00	38.00	48.00	11.00	51.00
augustus_masked-tulip_contig_327_pilon_pilon-processed-gene-10.18-mRNA-1	0.00	0.00	0.00	0.00	2.00	0.00	0.00	0.00	0.00	0.00	0.00	0.00	0.00	0.00	0.00	0.00	0.00	0.00
augustus_masked-tulip_contig_659_pilon_pilon-processed-gene-1.3-mRNA-1	0.00	0.00	0.00	2.00	6.00	2.00	1.00	1.00	2.00	0.00	0.00	0.00	45.00	7.00	48.00	32.00	12.00	25.00
maker-tulip_contig_855_pilon_pilon-augustus-gene-2.25-mRNA-1	39.00	30.00	31.00	3.00	1.00	1.00	0.00	1.00	0.00	1.00	1.00	1.00	0.00	0.00	0.00	0.00	0.00	1.00
maker-tulip_contig_112_pilon_pilon-augustus-gene-0.2-mRNA-1	188.00	173.00	169.00	215.00	192.00	192.00	30.00	80.00	45.00	63.00	38.00	43.00	307.00	31.00	186.00	61.00	23.00	48.00
maker-tulip_contig_429_pilon_pilon-augustus-gene-0.34-mRNA-1	0.00	0.00	1.00	0.00	0.00	2.00	2.00	4.00	1.00	16.00	8.00	19.00	38.00	6.00	17.00	6.00	2.00	2.00
maker-tulip_contig_199_pilon_pilon-augustus-gene-5.20-mRNA-1	2.00	2.00	0.00	289.00	306.00	284.00	63.00	54.00	50.00	14.00	2.00	10.00	27.00	7.00	11.00	37.00	10.00	20.00
maker-tulip_contig_706_pilon_pilon-augustus-gene-0.18-mRNA-1	0.00	0.00	0.00	0.00	0.00	0.00	0.00	0.00	0.00	0.00	0.00	0.00	0.00	0.00	0.00	338.00	196.00	387.00
maker-tulip_contig_673_pilon_pilon-augustus-gene-1.25-mRNA-1	8.00	43.00	29.00	0.00	0.00	0.00	0.00	0.00	0.00	0.00	0.00	0.00	37.00	1.00	88.00	113.00	74.00	148.00
maker-tulip_contig_153_pilon_pilon-augustus-gene-1.18-mRNA-1	8074.00	6111.00	7417.00	2507.00	2755.00	2433.00	1245.00	1156.00	852.00	3954.00	3046.00	3747.00	2287.00	331.00	1601.00	1116.00	502.00	1210.00
maker-tulip_contig_807_pilon_pilon-augustus-gene-3.80-mRNA-1	1247.00	1013.00	1250.00	160.00	129.00	117.00	339.00	169.00	177.00	1273.00	993.00	1412.00	88.00	9.00	39.00	59.00	30.00	57.00
maker-tulip_contig_191_pilon_pilon-augustus-gene-0.63-mRNA-1	0.00	0.00	0.00	1.00	0.00	2.00	42.00	24.00	16.00	0.00	0.00	0.00	0.00	0.00	0.00	0.00	0.00	0.00
maker-tulip_contig_361_pilon_pilon-augustus-gene-1.53-mRNA-1	366.00	197.00	429.00	339.00	327.00	316.00	234.00	201.00	163.00	562.00	426.00	531.00	887.00	120.00	553.00	252.00	109.00	291.00
augustus_masked-tulip_contig_474_pilon_pilon-processed-gene-4.12-mRNA-1	0.00	0.00	1.00	30.00	17.00	23.00	165.07	55.00	107.00	297.00	154.00	53.00	233.00	24.00	40.00	292.00	26.00	135.00
maker-tulip_contig_209_pilon_pilon-augustus-gene-2.46-mRNA-1	114.66	146.48	138.00	216.31	227.71	259.34	54.51	46.00	46.00	167.37	210.25	174.61	81.98	15.00	90.84	118.12	45.57	145.01
maker-tulip_contig_843_pilon_pilon-augustus-gene-4.11-mRNA-1	0.00	0.00	0.00	0.00	0.00	0.00	0.00	0.00	0.00	0.00	0.00	0.00	0.00	0.00	0.00	0.00	0.00	0.00
maker-tulip_contig_196_pilon_pilon-augustus-gene-0.0-mRNA-1	0.00	0.00	0.00	0.00	0.00	0.00	0.00	0.00	0.00	0.00	0.00	0.00	0.00	0.00	0.00	0.00	0.00	0.00
augustus_masked-tulip_contig_430_pilon_pilon-processed-gene-0.20-mRNA-1	11.00	4.00	4.00	1415.00	2054.00	2831.00	133.00	1767.00	111.00	4.00	0.00	3.00	6.00	1.00	7.00	4.00	0.00	4.00
maker-tulip_contig_447_pilon_pilon-augustus-gene-0.26-mRNA-1	6.00	1.00	5.00	4.00	4.00	3.00	2.00	2.00	2.00	0.00	0.00	3.00	3.00	0.00	3.00	1.00	0.00	0.00
maker-tulip_contig_259_pilon_pilon-augustus-gene-0.0-mRNA-1	0.00	0.00	0.00	87.00	96.00	68.00	48.00	13.00	15.00	1.00	5.00	1.00	10.00	2.00	2.00	32.00	5.00	23.00
augustus_masked-tulip_contig_391_pilon_pilon-processed-gene-0.1-mRNA-1	12.00	1.00	0.00	112.00	78.00	108.00	26.00	19.00	15.00	15.00	11.00	9.00	13.00	4.00	12.00	19.00	3.00	6.00
maker-tulip_contig_354_pilon_pilon-augustus-gene-0.25-mRNA-1	0.00	0.00	0.00	0.00	0.00	0.00	0.00	0.00	0.00	0.00	0.00	0.00	0.00	0.00	0.00	0.00	0.00	0.00
maker-tulip_contig_80_pilon_pilon-augustus-gene-0.51-mRNA-1	236.00	222.00	285.00	63.00	61.00	52.00	85.00	98.00	52.00	99.00	81.00	81.00	556.00	68.00	384.00	45.00	20.00	28.00
maker-tulip_contig_23_pilon_pilon-augustus-gene-0.43-mRNA-1	462.00	652.00	824.00	384.00	450.00	481.00	393.00	347.00	264.00	964.00	638.00	744.00	1319.00	182.00	817.00	436.00	183.00	460.00
augustus_masked-tulip_contig_99_pilon_pilon-processed-gene-0.41-mRNA-1	0.00	1.00	0.00	0.00	0.00	0.00	0.00	0.00	0.00	1.00	1.00	0.00	0.00	1.00	1.00	0.00	0.00	0.00
augustus_masked-tulip_contig_275_pilon_pilon-processed-gene-0.53-mRNA-1	0.00	0.00	0.00	0.00	0.00	0.00	0.00	0.00	0.00	0.00	0.00	0.00	1.00	0.00	0.00	0.00	0.00	0.00
augustus_masked-tulip_contig_72_pilon_pilon-processed-gene-0.1-mRNA-1	24.00	29.00	15.00	25.00	18.00	14.00	21.38	18.00	12.00	60.01	35.39	52.41	62.44	12.54	32.72	34.00	3.21	38.00
augustus_masked-tulip_contig_508_pilon_pilon-processed-gene-1.65-mRNA-1	0.00	0.00	0.00	0.00	0.00	1.00	0.00	0.00	0.00	1.00	0.00	0.00	2.00	1.00	0.00	48.00	12.00	20.00
augustus_masked-tulip_contig_800_pilon_pilon-processed-gene-1.0-mRNA-1	0.00	3.00	0.00	0.00	0.00	0.00	0.00	0.00	0.00	0.00	0.00	0.00	2.00	0.00	1.00	0.00	0.00	0.00
maker-tulip_contig_147_pilon_pilon-augustus-gene-1.42-mRNA-1	282.00	199.00	275.00	507.00	566.00	606.00	535.00	1075.00	453.00	111.00	129.00	97.00	455.00	54.00	330.00	182.00	97.00	221.00
augustus_masked-tulip_contig_132_pilon_pilon-processed-gene-1.27-mRNA-1	10.00	14.00	1.00	4.00	3.00	5.00	4.00	4.00	1.00	9.00	4.00	7.00	30.00	5.00	35.00	10.00	2.00	3.00
maker-tulip_contig_247_pilon_pilon-augustus-gene-2.59-mRNA-1	0.00	0.00	0.00	0.00	0.00	0.00	0.00	0.00	0.00	0.00	0.00	0.00	0.00	0.00	0.00	4.00	2.00	3.00
maker-tulip_contig_323_pilon_pilon-augustus-gene-2.26-mRNA-1	0.00	0.00	0.00	0.00	0.00	0.00	1.00	0.00	0.00	0.00	0.00	0.00	2.00	0.00	0.00	0.00	0.00	1.00
maker-tulip_contig_247_pilon_pilon-augustus-gene-2.69-mRNA-1	0.00	0.00	0.00	14.00	12.00	15.00	67.00	28.00	29.00	63.00	34.00	44.00	29.00	2.00	3.00	3.00	3.00	16.00
maker-tulip_contig_931_pilon_pilon-augustus-gene-1.34-mRNA-1	212.00	109.00	203.00	216.00	264.00	252.00	227.00	292.00	170.00	174.00	187.00	196.00	236.00	25.00	114.00	145.00	77.00	166.00
maker-tulip_contig_516_pilon_pilon-augustus-gene-2.14-mRNA-1	0.00	4.00	1.00	70.00	103.00	93.00	88.00	126.00	33.00	54.00	87.00	56.00	406.00	74.00	263.00	483.00	229.00	388.00
maker-tulip_contig_862_pilon_pilon-augustus-gene-1.57-mRNA-1	62.00	102.00	61.00	867.00	778.00	835.00	596.00	930.00	409.00	462.00	322.00	324.00	946.00	127.00	608.00	576.00	157.00	435.00
maker-tulip_contig_396_pilon_pilon-augustus-gene-0.15-mRNA-1	73.00	55.00	99.00	61.00	111.00	60.00	64.00	75.00	43.00	613.00	473.00	540.00	4426.00	914.00	3171.00	376.00	110.00	279.00
augustus_masked-tulip_contig_907_pilon_pilon-processed-gene-4.0-mRNA-1	0.00	0.00	0.00	0.00	0.00	0.00	0.00	0.00	0.00	0.00	0.00	0.00	0.00	0.00	0.00	0.00	0.00	0.00
maker-tulip_contig_407_pilon_pilon-augustus-gene-8.90-mRNA-1	0.00	0.00	0.00	0.00	0.00	0.00	0.00	0.00	0.00	0.00	0.00	0.00	0.00	0.00	0.00	0.00	0.00	0.00
augustus_masked-tulip_contig_618_pilon_pilon-processed-gene-0.3-mRNA-1	7.00	12.00	31.00	690.00	783.00	585.00	154.00	109.00	82.00	67.00	67.00	78.00	68.00	12.00	52.00	34.00	11.00	41.00
augustus_masked-tulip_contig_691_pilon_pilon-processed-gene-3.27-mRNA-1	0.00	0.00	0.00	0.00	0.00	0.00	0.00	0.00	0.00	0.00	0.00	0.00	0.00	0.00	0.00	0.00	0.00	0.00
maker-tulip_contig_843_pilon_pilon-augustus-gene-8.22-mRNA-1	17.00	11.00	8.00	142.00	145.00	135.00	123.00	151.00	106.00	1101.00	592.00	788.00	174.00	22.00	142.00	96.00	41.00	91.00
augustus_masked-tulip_contig_238_pilon_pilon-processed-gene-0.6-mRNA-1	33.51	34.46	41.44	6.85	8.91	8.00	19.98	14.03	14.00	16.93	5.03	2.95	12.21	3.00	16.00	2.99	5.00	7.00
augustus_masked-tulip_contig_623_pilon_pilon-processed-gene-0.6-mRNA-1	0.00	12.00	0.00	2.00	9.00	10.00	15.00	42.00	20.00	99.00	31.00	43.00	797.00	18.00	81.00	280.00	47.00	129.00
augustus_masked-tulip_contig_504_pilon_pilon-processed-gene-1.0-mRNA-1	0.00	0.00	0.00	0.00	0.00	0.00	0.00	0.00	0.00	0.00	0.00	0.00	0.00	0.00	0.00	0.00	0.00	0.00
maker-tulip_contig_667_pilon_pilon-augustus-gene-0.24-mRNA-1	0.00	0.00	0.00	83.00	197.00	103.00	176.00	316.00	112.00	297.00	279.00	300.00	716.00	114.00	830.00	1043.00	433.00	883.00
maker-tulip_contig_321_pilon_pilon-augustus-gene-0.7-mRNA-1	21.00	14.00	10.00	64.00	82.00	81.00	68.00	52.00	62.00	57.00	28.00	34.00	147.00	30.00	94.00	72.00	11.00	46.00
maker-tulip_contig_394_pilon_pilon-augustus-gene-1.3-mRNA-1	490.00	342.00	282.00	401.00	540.00	479.00	591.00	537.00	342.00	132.00	106.00	117.00	729.00	99.00	461.00	176.00	47.00	123.00
maker-tulip_contig_199_pilon_pilon-augustus-gene-0.13-mRNA-1	107.00	133.00	133.00	288.00	270.00	260.00	207.00	234.00	119.00	140.00	72.00	115.00	247.00	31.00	153.00	109.00	32.00	104.00
maker-tulip_contig_931_pilon_pilon-augustus-gene-1.31-mRNA-1	1471.00	1383.00	1254.00	783.00	607.00	671.00	241.00	227.00	188.00	840.00	737.00	837.00	917.00	118.00	675.00	257.00	92.00	219.00
augustus_masked-tulip_contig_640_pilon_pilon-processed-gene-1.1-mRNA-1	3.00	9.00	5.00	4.00	3.00	5.00	28.00	16.00	12.00	3.00	5.00	3.00	8.00	1.00	3.00	9.00	2.00	6.00
augustus_masked-tulip_contig_525_pilon_pilon-processed-gene-0.5-mRNA-1	199.00	154.00	150.00	96.00	136.00	117.00	65.00	87.00	60.00	103.00	63.00	100.00	499.00	89.00	329.00	63.00	42.00	88.00
augustus_masked-tulip_contig_247_pilon_pilon-processed-gene-2.160-mRNA-1	424.00	449.00	502.00	104.00	123.00	126.00	154.00	138.00	128.00	196.00	177.00	201.00	1177.00	138.00	715.00	51.00	34.00	53.00
augustus_masked-tulip_contig_227_pilon_pilon-processed-gene-0.22-mRNA-1	15.00	4.00	7.00	13.00	20.00	19.00	16.00	41.00	27.00	3.00	7.00	6.00	20.00	2.00	8.00	1.00	0.00	1.00
maker-tulip_contig_86_pilon_pilon-augustus-gene-0.42-mRNA-1	0.00	0.00	0.00	22.00	40.00	23.00	2.00	5.00	1.00	3.00	1.00	3.00	3.00	1.00	1.00	3.00	2.00	3.00
maker-tulip_contig_603_pilon_pilon-augustus-gene-1.30-mRNA-1	0.00	0.00	0.00	0.00	0.00	0.00	2.00	0.00	1.00	0.00	0.00	0.00	0.00	0.00	0.00	42.00	15.00	27.00
maker-tulip_contig_429_pilon_pilon-augustus-gene-1.31-mRNA-1	90.00	82.00	102.00	68.00	70.00	69.00	57.00	38.00	27.00	92.00	91.00	75.00	319.00	68.00	295.00	32.00	16.00	30.00
maker-tulip_contig_716_pilon_pilon-augustus-gene-0.17-mRNA-1	3.00	5.00	1.00	5.00	0.00	0.00	1.00	0.00	2.00	0.00	0.00	1.00	3.00	0.00	0.00	0.00	0.00	0.00
maker-tulip_contig_280_pilon_pilon-augustus-gene-1.80-mRNA-1	58.00	36.00	67.00	44.00	42.00	46.00	49.00	36.00	29.00	259.00	192.00	206.00	329.00	43.00	243.00	109.00	49.00	152.00
augustus_masked-tulip_contig_72_pilon_pilon-processed-gene-0.12-mRNA-1	79.00	84.00	90.00	357.00	365.00	404.00	79.00	99.00	79.00	146.00	133.00	126.00	245.00	25.00	154.00	409.00	151.00	321.00
maker-tulip_contig_281_pilon_pilon-augustus-gene-3.36-mRNA-1	333.00	259.00	389.00	60.00	114.00	87.00	47.00	58.00	48.00	262.00	197.00	233.00	367.00	56.00	272.00	179.00	101.00	220.00
augustus_masked-tulip_contig_473_pilon_pilon-processed-gene-0.26-mRNA-1	2.00	1.00	0.00	13133.00	12355.00	4226.00	1079.00	252.00	550.00	30911.00	26163.00	31768.00	1763.00	97.00	284.00	1213.00	205.00	944.00
maker-tulip_contig_623_pilon_pilon-augustus-gene-4.54-mRNA-1	66.00	45.00	145.00	36.00	49.00	43.00	30.00	68.00	29.00	238.00	144.00	201.00	339.00	38.00	194.00	226.00	165.00	244.00
augustus_masked-tulip_contig_86_pilon_pilon-processed-gene-0.13-mRNA-1	0.00	0.00	0.00	91.00	101.00	110.00	39.00	64.00	31.00	8.00	19.00	7.00	93.00	16.00	52.00	92.00	22.00	50.00
maker-tulip_contig_483_pilon_pilon-augustus-gene-0.3-mRNA-1	7.00	2.00	6.00	135.00	91.00	97.00	79.00	35.00	49.00	594.00	565.00	601.00	48.00	4.00	23.00	47.00	27.00	48.00
augustus_masked-tulip_contig_645_pilon_pilon-processed-gene-5.22-mRNA-1	0.00	0.00	0.00	0.00	0.00	0.00	0.00	0.00	0.00	0.00	0.00	0.00	0.00	0.00	0.00	0.00	0.00	0.00
maker-tulip_contig_196_pilon_pilon-augustus-gene-2.6-mRNA-1	17.00	25.00	31.00	102.00	115.00	113.00	70.00	67.00	38.00	65.00	54.00	62.00	648.00	115.00	391.00	184.00	89.00	220.00
maker-tulip_contig_474_pilon_pilon-augustus-gene-6.26-mRNA-1	0.00	2.00	0.00	4.00	5.00	2.00	4.00	6.00	4.00	14.00	5.00	3.00	33.00	4.00	11.00	4.00	1.00	4.00
maker-tulip_contig_807_pilon_pilon-augustus-gene-1.20-mRNA-1	1.54	5.00	4.77	2.00	12.54	7.00	3.00	5.00	4.00	6.00	8.28	5.00	9.00	0.00	2.00	2.00	0.00	3.00
augustus_masked-tulip_contig_715_pilon_pilon-processed-gene-0.32-mRNA-1	0.00	0.00	0.00	0.00	0.00	0.00	0.00	0.00	0.00	0.00	0.00	0.00	0.00	0.00	0.00	0.00	0.00	0.00
maker-tulip_contig_307_pilon_pilon-augustus-gene-1.176-mRNA-1	0.00	0.00	0.00	17.00	8.00	12.00	9.00	2.00	1.00	0.00	0.00	0.00	0.00	0.00	0.00	0.00	0.00	0.00
maker-tulip_contig_854_pilon_pilon-augustus-gene-2.30-mRNA-1	26.00	19.00	42.00	891.00	1114.00	874.00	158.00	177.00	107.00	300.00	238.00	311.00	409.00	52.00	256.00	64.00	22.00	65.00
augustus_masked-tulip_contig_236_pilon_pilon-processed-gene-0.65-mRNA-1	0.00	0.00	0.00	0.00	0.00	0.00	0.00	0.00	0.00	0.00	0.00	0.00	0.00	0.00	0.00	0.00	0.00	0.00
maker-tulip_contig_3_pilon_pilon-augustus-gene-6.20-mRNA-1	9582.00	5611.00	9723.00	9184.00	10148.00	7999.00	6047.00	3585.00	3218.00	3526.00	3594.00	3830.00	21255.00	2643.00	10587.00	16622.00	5956.00	17274.00
maker-tulip_contig_583_pilon_pilon-augustus-gene-1.24-mRNA-1	0.00	0.00	0.00	133.00	142.00	134.00	48.00	33.00	29.00	1.00	3.00	2.00	4.00	0.00	5.00	3.00	2.00	8.00
maker-tulip_contig_59_pilon_pilon-augustus-gene-0.54-mRNA-1	9.00	7.35	10.37	14.56	21.32	29.73	15.28	6.43	42.56	85.17	59.66	99.30	36.78	0.00	42.22	48.43	21.99	45.88
maker-tulip_contig_121_pilon_pilon-augustus-gene-4.47-mRNA-1	289.00	336.00	371.00	159.00	111.00	153.00	177.00	180.00	109.00	175.00	138.00	142.00	1100.00	165.00	817.00	159.00	70.00	189.00
maker-tulip_contig_22_pilon_pilon-augustus-gene-0.12-mRNA-1	53.00	64.00	28.00	8.00	7.00	12.00	10.00	14.00	6.00	3.00	5.00	10.00	14.00	5.00	24.00	3.00	1.00	0.00
maker-tulip_contig_252_pilon_pilon-augustus-gene-1.6-mRNA-1	0.00	0.00	0.00	0.00	1.00	1.00	0.00	0.00	0.00	0.00	0.00	3.00	0.00	0.00	0.00	361.00	244.00	379.00
augustus_masked-tulip_contig_491_pilon_pilon-processed-gene-0.0-mRNA-1	1057.00	504.00	891.00	1.00	0.00	1.00	0.00	0.00	4.00	1082.00	866.00	786.00	30.00	5.00	10.00	23.00	3.00	18.00
maker-tulip_contig_623_pilon_pilon-augustus-gene-4.71-mRNA-1	0.00	0.00	0.00	0.00	1.00	0.00	0.00	0.00	0.00	8.00	7.00	2.00	0.00	0.00	0.00	1.00	0.00	0.00
augustus_masked-tulip_contig_187_pilon_pilon-processed-gene-1.23-mRNA-1	98.00	74.00	185.00	154.00	167.00	140.00	64.00	51.00	40.00	44.00	26.00	40.00	42.00	10.00	22.00	8.00	3.00	14.00
maker-tulip_contig_33_pilon_pilon-augustus-gene-0.24-mRNA-1	48.00	25.00	29.00	18.00	26.00	29.00	13.00	4.00	6.00	51.00	47.00	44.00	54.00	6.00	56.00	40.00	8.00	28.00
maker-tulip_contig_691_pilon_pilon-augustus-gene-0.37-mRNA-1	18.00	33.00	33.00	73.00	76.00	80.00	81.00	49.00	47.00	124.00	83.00	90.00	279.00	48.00	172.00	46.00	22.00	62.00
maker-tulip_contig_593_pilon_pilon-augustus-gene-0.13-mRNA-1	12.00	11.00	8.00	134.00	109.00	88.00	73.00	51.00	54.00	120.00	96.00	138.00	157.00	14.00	89.00	69.00	27.00	66.00
maker-tulip_contig_674_pilon_pilon-augustus-gene-3.9-mRNA-1	9.88	9.00	6.78	24.73	16.00	18.57	35.00	46.86	17.20	77.94	40.41	41.92	24.56	3.70	31.69	35.74	17.00	20.00
augustus_masked-tulip_contig_691_pilon_pilon-processed-gene-2.11-mRNA-1	584.00	689.00	649.00	481.00	482.00	508.00	319.00	287.00	210.00	1155.00	1099.00	1089.00	1826.00	228.00	1075.00	976.00	241.00	775.00
augustus_masked-tulip_contig_759_pilon_pilon-processed-gene-1.13-mRNA-1	5.00	0.00	0.00	1.00	0.00	1.00	0.00	5.00	2.00	13.00	10.00	8.00	0.00	0.00	1.00	4.00	0.00	0.00
maker-tulip_contig_7_pilon_pilon-augustus-gene-0.23-mRNA-1	0.00	0.00	0.00	0.00	0.00	0.00	0.00	0.00	0.00	0.00	0.00	0.00	0.00	0.00	0.00	1.00	0.00	0.00
maker-tulip_contig_448_pilon_pilon-augustus-gene-0.53-mRNA-1	329.00	322.17	376.00	75.00	71.00	63.00	79.00	83.00	64.00	168.02	185.00	163.00	278.00	35.00	183.00	57.00	21.00	63.00
maker-tulip_contig_180_pilon_pilon-augustus-gene-0.10-mRNA-1	0.00	5.20	5.00	0.00	1.00	0.00	1.00	0.00	0.00	2.00	0.00	1.00	2.00	0.00	0.00	1.00	0.00	0.00
maker-tulip_contig_145_pilon_pilon-augustus-gene-5.36-mRNA-1	7.00	6.00	13.00	36.00	27.00	34.00	33.00	19.00	22.00	66.00	19.00	39.00	119.00	23.00	71.00	16.00	12.00	29.00
maker-tulip_contig_177_pilon_pilon-augustus-gene-0.64-mRNA-1	0.00	0.00	0.00	0.00	2.00	1.00	0.00	0.00	1.00	0.00	1.00	2.00	6.00	0.00	6.00	4.00	0.00	2.00
maker-tulip_contig_290_pilon_pilon-augustus-gene-0.31-mRNA-1	30.00	27.00	24.00	75.00	87.00	51.00	81.00	101.00	46.00	28.00	15.00	21.00	75.00	10.00	54.00	20.00	11.00	12.00
augustus_masked-tulip_contig_907_pilon_pilon-processed-gene-5.30-mRNA-1	52.00	24.00	61.00	99.00	93.00	94.00	31.00	36.00	26.00	97.00	71.00	94.00	157.00	25.00	101.00	27.00	15.00	32.00
maker-tulip_contig_288_pilon_pilon-augustus-gene-0.9-mRNA-1	265.00	233.00	254.00	147.00	149.00	162.00	203.00	279.00	144.00	64.00	46.00	50.00	232.00	32.00	190.00	102.00	30.00	60.00
maker-tulip_contig_237_pilon_pilon-augustus-gene-0.42-mRNA-1	36.00	28.00	41.00	303.00	397.00	349.00	216.00	230.00	120.00	560.00	369.00	454.00	440.00	64.00	269.00	157.00	81.00	172.00
maker-tulip_contig_870_pilon_pilon-augustus-gene-4.32-mRNA-1	1.00	0.00	0.00	6.00	7.00	7.00	0.00	3.00	3.00	5.00	0.00	4.00	20.00	0.00	7.00	3.00	4.00	5.00
augustus_masked-tulip_contig_555_pilon_pilon-processed-gene-2.105-mRNA-1	106.00	53.00	148.00	447.00	436.00	522.00	267.00	265.00	168.00	641.00	354.00	506.00	678.00	104.00	369.00	318.00	130.00	374.00
augustus_masked-tulip_contig_212_pilon_pilon-processed-gene-1.125-mRNA-1	0.00	0.00	0.00	122.00	138.00	117.00	374.00	214.00	152.00	0.00	2.00	6.00	92.00	9.00	95.00	193.00	139.00	230.00
augustus_masked-tulip_contig_190_pilon_pilon-processed-gene-2.34-mRNA-1	0.00	0.00	0.92	3.51	0.00	2.05	4.26	0.00	0.00	10.94	7.64	8.49	3.03	1.00	7.84	0.00	0.00	3.50
maker-tulip_contig_283_pilon_pilon-augustus-gene-3.8-mRNA-1	1.00	2.00	1.00	1.00	2.00	2.00	0.00	0.00	2.00	1.00	3.00	0.00	9.00	0.00	7.00	2.00	5.00	7.00
maker-tulip_contig_334_pilon_pilon-augustus-gene-4.58-mRNA-1	0.00	0.00	0.00	0.00	7.00	2.00	2.00	9.00	4.00	509.00	440.00	229.00	61.00	6.00	98.00	250.00	55.00	132.00
maker-tulip_contig_18_pilon_pilon-augustus-gene-0.19-mRNA-1	215.00	240.00	192.00	249.00	266.00	294.00	261.00	175.00	118.00	117.00	58.00	72.00	378.00	74.00	286.00	81.00	13.00	76.00
maker-tulip_contig_62_pilon_pilon-augustus-gene-0.7-mRNA-1	0.00	0.00	0.00	97.00	97.00	106.00	60.00	77.00	50.00	95.00	97.00	92.00	194.00	8.00	109.00	108.00	52.00	227.00
maker-tulip_contig_702_pilon_pilon-augustus-gene-0.44-mRNA-1	1.00	0.00	0.00	580.00	612.00	674.00	744.00	555.00	460.00	165.00	145.00	157.00	38.00	4.00	27.00	76.00	26.00	60.00
maker-tulip_contig_654_pilon_pilon-augustus-gene-1.46-mRNA-1	0.00	0.00	0.00	0.00	0.00	0.00	0.00	0.00	0.00	4.00	0.00	0.00	5.00	1.00	5.00	0.00	0.00	1.00
augustus_masked-tulip_contig_181_pilon_pilon-processed-gene-1.58-mRNA-1	56.00	119.00	62.00	55.00	92.00	59.00	74.00	77.00	54.00	88.00	60.00	67.00	258.00	30.00	186.00	65.00	33.00	81.00
maker-tulip_contig_619_pilon_pilon-augustus-gene-1.33-mRNA-1	0.00	4.00	0.00	0.00	0.00	0.00	0.00	0.00	0.00	0.00	0.00	0.00	0.00	0.00	1.00	1253.00	782.00	1343.00
maker-tulip_contig_570_pilon_pilon-augustus-gene-0.42-mRNA-1	0.00	0.00	0.00	0.00	0.00	0.00	0.00	0.00	0.00	0.00	0.00	0.00	0.00	0.00	0.00	1.00	0.00	0.00
augustus_masked-tulip_contig_52_pilon_pilon-processed-gene-2.14-mRNA-1	3.00	0.00	1.00	158.00	203.00	151.56	11.00	2.74	12.00	4.00	4.00	8.00	24.00	0.00	8.32	8.00	6.00	0.00
augustus_masked-tulip_contig_521_pilon_pilon-processed-gene-0.4-mRNA-1	0.00	0.00	0.00	18.00	6.00	11.00	16.00	20.00	13.00	0.00	0.00	0.00	0.00	0.00	0.00	0.00	0.00	0.00
maker-tulip_contig_745_pilon_pilon-augustus-gene-1.30-mRNA-1	47.00	18.00	53.00	26.00	22.00	38.00	15.00	13.00	15.00	41.00	23.00	58.00	107.00	19.00	66.00	13.00	9.00	21.00
maker-tulip_contig_317_pilon_pilon-augustus-gene-0.13-mRNA-1	199.00	279.00	165.00	659.00	516.00	689.00	777.00	308.00	386.00	191.00	142.00	129.00	1322.00	152.00	843.00	505.00	174.00	376.00
augustus_masked-tulip_contig_138_pilon_pilon-processed-gene-0.10-mRNA-1	5.00	4.00	9.00	54.00	63.00	38.00	47.00	45.00	43.00	50.00	44.00	46.00	97.00	15.00	93.00	11.00	5.00	18.00
augustus_masked-tulip_contig_527_pilon_pilon-processed-gene-4.10-mRNA-1	1.00	0.00	0.00	1.00	6.00	0.00	0.00	0.00	0.00	5.00	6.49	1.00	2.00	0.00	0.00	2.00	0.00	2.00
maker-tulip_contig_759_pilon_pilon-augustus-gene-1.61-mRNA-1	4.00	10.00	2.00	275.00	350.00	253.00	26.00	17.00	20.00	39.00	24.00	22.00	19.00	5.00	31.00	27.00	10.00	27.00
maker-tulip_contig_272_pilon_pilon-augustus-gene-2.12-mRNA-1	284.00	275.00	330.00	329.00	266.00	333.00	153.00	115.00	120.00	342.00	328.00	345.00	491.00	72.00	383.00	251.00	70.00	212.00
maker-tulip_contig_81_pilon_pilon-augustus-gene-1.13-mRNA-1	1.00	0.00	2.00	170.34	203.47	178.29	521.00	260.00	129.53	0.00	1.00	0.00	0.00	1.00	2.00	0.00	1.00	0.00
augustus_masked-tulip_contig_316_pilon_pilon-processed-gene-3.12-mRNA-1	0.00	0.00	0.00	0.00	0.00	0.00	16.00	41.00	8.00	43.00	18.00	26.00	6.00	0.00	17.00	7.00	0.00	4.00
augustus_masked-tulip_contig_24_pilon_pilon-processed-gene-0.3-mRNA-1	4.00	1.00	3.00	2.00	1.99	2.06	1.00	2.00	0.00	2.00	1.00	3.00	1.00	0.00	0.00	0.00	0.00	0.00
augustus_masked-tulip_contig_234_pilon_pilon-processed-gene-5.52-mRNA-1	0.00	0.00	0.00	6.00	11.00	11.00	0.00	2.00	6.00	7.00	1.00	4.00	3.00	2.00	0.00	5.00	4.00	3.00
augustus_masked-tulip_contig_407_pilon_pilon-processed-gene-7.6-mRNA-1	28.44	42.21	40.71	25.82	31.80	22.38	39.19	41.49	43.65	17.64	30.75	20.59	362.95	52.42	216.73	10.84	7.75	8.08
augustus_masked-tulip_contig_595_pilon_pilon-processed-gene-0.7-mRNA-1	3.00	1.00	6.00	4.00	7.00	7.00	8.00	3.00	3.00	5.00	3.00	7.00	17.00	2.00	16.00	17.00	5.00	24.00
maker-tulip_contig_628_pilon_pilon-augustus-gene-0.23-mRNA-1	506.00	506.00	572.00	308.00	283.00	313.00	131.00	103.00	136.00	269.00	231.00	289.00	359.00	41.00	295.00	131.00	67.00	203.00
augustus_masked-tulip_contig_360_pilon_pilon-processed-gene-0.7-mRNA-1	0.00	0.00	0.00	129.00	183.00	145.00	123.00	116.00	64.00	13.00	6.00	10.00	30.00	0.00	16.00	41.00	9.00	45.00
maker-tulip_contig_405_pilon_pilon-augustus-gene-0.30-mRNA-1	40.00	64.00	26.00	9.00	10.00	11.00	12.00	8.00	2.00	12.00	3.00	11.00	17.00	2.00	16.00	0.00	1.00	6.00
maker-tulip_contig_691_pilon_pilon-augustus-gene-2.84-mRNA-1	1134.00	615.00	773.00	259.00	365.00	320.00	416.00	412.00	295.00	193.00	170.00	199.00	618.00	100.00	401.00	72.00	38.00	67.00
augustus_masked-tulip_contig_270_pilon_pilon-processed-gene-2.24-mRNA-1	1084.65	849.47	914.84	886.00	1056.00	1065.48	1512.00	2143.05	995.00	819.97	772.76	826.00	2297.00	328.50	1371.53	3301.52	2175.51	4723.27
maker-tulip_contig_508_pilon_pilon-augustus-gene-0.12-mRNA-1	0.00	0.00	0.00	0.00	0.00	0.00	0.00	0.00	0.00	0.00	0.00	0.00	1.00	0.00	0.00	0.00	0.00	0.00
maker-tulip_contig_424_pilon_pilon-augustus-gene-2.65-mRNA-1	674.00	600.36	697.00	345.00	329.59	364.00	178.00	174.00	135.80	494.74	370.00	437.00	781.10	117.00	431.96	225.00	113.00	257.19
maker-tulip_contig_809_pilon_pilon-augustus-gene-2.8-mRNA-1	30.00	46.00	35.00	24327.00	23604.00	22313.00	29970.00	22840.00	17592.00	4094.00	2895.00	5163.00	10733.00	1081.00	8158.00	10007.00	3237.00	14104.00
maker-tulip_contig_306_pilon_pilon-augustus-gene-0.82-mRNA-1	33.00	19.00	30.00	44.00	60.00	65.00	23.00	11.00	19.00	62.00	35.00	40.00	57.00	16.00	34.00	41.00	19.00	40.00
maker-tulip_contig_58_pilon_pilon-augustus-gene-1.34-mRNA-1	2019.00	2111.00	2492.00	224.00	208.00	280.00	215.00	142.00	149.00	351.00	277.00	338.00	499.00	52.00	371.00	200.00	46.00	147.00
augustus_masked-tulip_contig_254_pilon_pilon-processed-gene-0.38-mRNA-1	1023.00	1221.00	1350.00	1831.00	1800.00	1972.00	1343.00	1455.00	891.00	1000.00	855.00	837.00	1274.00	158.00	785.00	569.00	297.00	821.00
augustus_masked-tulip_contig_248_pilon_pilon-processed-gene-0.8-mRNA-1	75.00	46.00	63.00	406.00	414.00	435.00	339.00	305.00	223.00	306.00	224.00	271.00	692.00	93.00	462.00	358.00	151.00	568.00
augustus_masked-tulip_contig_637_pilon_pilon-processed-gene-1.24-mRNA-1	22.62	5.81	17.54	0.00	2.49	0.68	3.79	4.45	0.00	0.00	0.88	9.59	4.39	0.00	0.00	2.23	0.53	4.14
maker-tulip_contig_247_pilon_pilon-augustus-gene-0.22-mRNA-1	0.00	0.00	0.00	8.00	1.00	1.00	0.00	1.00	0.00	0.00	0.00	0.00	0.00	0.00	1.00	4.00	5.00	6.00
augustus_masked-tulip_contig_402_pilon_pilon-processed-gene-1.2-mRNA-1	5.00	1.00	9.00	29.00	42.00	30.00	16.00	13.00	7.00	49.00	22.00	39.00	52.00	3.00	36.00	37.00	9.00	36.00
augustus_masked-tulip_contig_698_pilon_pilon-processed-gene-2.6-mRNA-1	229.00	242.00	210.00	402.00	435.00	411.00	396.00	371.00	266.00	605.00	362.00	572.00	1607.00	200.00	930.00	533.00	173.00	559.00
augustus_masked-tulip_contig_697_pilon_pilon-processed-gene-0.0-mRNA-1	0.00	0.00	0.00	0.90	0.00	0.00	0.00	0.00	0.00	0.00	0.00	0.00	0.00	0.00	0.00	0.00	0.00	0.00
maker-tulip_contig_181_pilon_pilon-augustus-gene-1.35-mRNA-1	15.00	12.00	14.00	60.00	65.00	64.00	75.00	40.00	44.00	57.00	43.00	46.00	95.00	11.00	65.00	48.00	23.00	55.00
augustus_masked-tulip_contig_604_pilon_pilon-processed-gene-3.26-mRNA-1	98.00	89.00	110.00	273.00	288.00	285.00	110.00	97.00	76.00	210.00	138.00	195.00	477.00	60.00	259.00	138.00	51.00	189.00
augustus_masked-tulip_contig_677_pilon_pilon-processed-gene-0.36-mRNA-1	3.00	2.00	1.00	0.00	3.00	0.00	0.00	0.00	0.00	0.00	1.00	1.00	1.00	0.00	2.00	0.00	0.00	0.00
maker-tulip_contig_121_pilon_pilon-augustus-gene-1.2-mRNA-1	1675.00	1461.00	1686.00	364.00	327.00	388.00	351.00	328.00	261.00	700.00	559.00	639.00	1257.00	195.00	908.00	347.00	162.00	278.00
maker-tulip_contig_35_pilon_pilon-augustus-gene-0.33-mRNA-1	417.84	469.00	435.85	156.98	136.00	177.14	212.00	149.00	152.00	384.00	369.00	378.00	708.81	102.72	519.47	350.00	124.00	282.00
maker-tulip_contig_550_pilon_pilon-augustus-gene-0.15-mRNA-1	59.37	64.44	52.01	163.91	168.61	180.56	295.56	155.42	188.00	130.52	109.19	113.28	610.72	58.64	386.91	89.86	70.81	114.31
maker-tulip_contig_199_pilon_pilon-augustus-gene-5.1-mRNA-1	0.00	0.00	0.00	0.00	0.00	0.00	0.00	0.00	0.00	0.00	0.00	0.00	0.00	0.00	0.00	0.00	0.00	0.00
maker-tulip_contig_690_pilon_pilon-augustus-gene-5.55-mRNA-1	9.00	5.00	11.00	8.00	13.00	7.00	8.00	11.00	2.00	9.00	4.00	7.00	14.00	1.00	10.00	13.00	7.00	14.00
maker-tulip_contig_190_pilon_pilon-augustus-gene-3.1-mRNA-1	2.00	3.00	25.00	0.00	0.00	0.00	0.00	0.00	0.00	0.00	0.00	0.00	86.00	18.00	122.00	2.00	0.00	0.00
maker-tulip_contig_623_pilon_pilon-augustus-gene-1.18-mRNA-1	73.00	79.00	101.00	18.00	21.00	15.00	13.00	19.00	17.00	60.00	34.00	37.00	162.00	30.00	92.00	40.00	17.00	33.00
augustus_masked-tulip_contig_622_pilon_pilon-processed-gene-0.7-mRNA-1	0.00	0.00	0.00	0.00	0.00	0.00	0.00	0.00	0.00	0.00	0.00	0.00	1.00	0.00	0.00	0.00	0.00	0.00
maker-tulip_contig_290_pilon_pilon-augustus-gene-5.26-mRNA-1	760.00	1006.00	691.00	579.00	698.00	654.00	1037.00	955.00	744.00	423.00	331.00	381.00	2458.00	315.00	1692.00	171.00	80.00	207.00
maker-tulip_contig_471_pilon_pilon-augustus-gene-0.4-mRNA-1	0.00	3.00	0.00	0.00	0.00	0.00	0.00	0.00	0.00	0.00	0.00	0.00	0.00	0.00	0.00	6.00	3.00	3.00
maker-tulip_contig_845_pilon_pilon-augustus-gene-0.55-mRNA-1	151.00	83.00	70.00	40.00	30.00	35.00	13.00	13.00	9.00	14.00	15.00	12.00	29.00	3.00	15.00	4.00	3.00	7.00
augustus_masked-tulip_contig_181_pilon_pilon-processed-gene-0.8-mRNA-1	71.00	107.00	76.00	73.00	71.00	61.00	45.00	51.00	35.00	205.00	188.00	175.00	394.00	42.00	271.00	99.00	36.00	63.00
maker-tulip_contig_474_pilon_pilon-augustus-gene-0.29-mRNA-1	7.00	12.00	2.00	4.00	5.00	7.00	2.00	6.00	3.00	21.00	3.00	12.00	18.00	4.00	14.00	5.00	1.00	8.00
maker-tulip_contig_325_pilon_pilon-augustus-gene-0.27-mRNA-1	1.00	0.00	0.00	0.00	0.00	0.00	0.00	0.00	0.00	4.00	1.00	4.00	0.00	0.00	1.00	1.00	0.00	0.00
augustus_masked-tulip_contig_513_pilon_pilon-processed-gene-0.1-mRNA-1	0.00	0.00	0.00	3.00	2.00	1.00	3.00	3.00	5.00	13.00	20.00	14.00	19.00	0.00	10.00	15.00	4.00	8.00
maker-tulip_contig_704_pilon_pilon-augustus-gene-2.59-mRNA-1	3263.00	1538.00	2348.00	748.00	962.00	992.00	1397.00	1495.00	958.00	426.00	331.00	394.00	1692.00	202.00	1072.00	94.00	47.00	119.00
maker-tulip_contig_860_pilon_pilon-augustus-gene-3.18-mRNA-1	0.00	2.00	3.00	22.00	22.00	12.00	5.00	4.00	1.00	16.00	12.00	15.00	19.00	2.00	9.00	18.00	3.00	12.00
augustus_masked-tulip_contig_211_pilon_pilon-processed-gene-1.2-mRNA-1	18.00	12.00	28.00	287.00	324.00	268.00	105.00	63.00	68.00	1188.00	800.00	1163.00	998.00	103.00	407.00	1029.00	223.00	599.00
maker-tulip_contig_519_pilon_pilon-augustus-gene-2.59-mRNA-1	0.00	0.00	0.00	0.00	0.00	0.00	0.00	0.00	0.00	0.00	0.00	0.00	0.00	0.00	0.00	0.00	0.00	0.00
maker-tulip_contig_58_pilon_pilon-augustus-gene-5.10-mRNA-1	526.00	357.00	404.00	171.00	163.00	169.00	147.00	168.00	103.00	210.00	197.00	185.00	927.00	94.00	524.00	421.00	128.00	249.00
augustus_masked-tulip_contig_194_pilon_pilon-processed-gene-0.65-mRNA-1	2.00	4.00	3.00	0.00	1.00	1.00	0.00	0.00	0.00	0.00	1.00	1.00	2.00	0.00	0.00	0.00	0.00	1.00
maker-tulip_contig_236_pilon_pilon-augustus-gene-4.36-mRNA-1	10.00	10.00	6.00	10.00	18.00	11.00	3.00	2.00	4.00	55.00	30.00	16.00	9.72	6.00	9.00	10.00	3.00	16.00
maker-tulip_contig_121_pilon_pilon-augustus-gene-3.22-mRNA-1	0.00	0.00	0.00	0.00	3.00	4.00	24.35	3.00	4.00	0.00	0.00	0.00	0.00	0.00	0.00	0.00	0.00	0.00
maker-tulip_contig_321_pilon_pilon-augustus-gene-0.4-mRNA-1	1.00	0.00	3.00	0.00	3.00	1.00	0.00	1.00	0.00	7.00	1.00	0.00	4.00	0.00	7.00	0.00	0.00	0.00
augustus_masked-tulip_contig_60_pilon_pilon-processed-gene-1.4-mRNA-1	2114.00	1573.00	1833.00	420.00	517.00	502.00	131.00	109.00	76.00	736.00	561.00	723.00	89.00	12.00	64.00	145.00	35.00	76.00
maker-tulip_contig_741_pilon_pilon-augustus-gene-0.8-mRNA-1	25.00	53.00	28.00	70.00	80.00	64.00	35.00	38.00	23.00	79.00	62.00	54.00	99.00	12.00	84.00	77.00	20.00	60.00
augustus_masked-tulip_contig_450_pilon_pilon-processed-gene-1.4-mRNA-1	2.34	9.14	0.00	0.00	1.00	0.00	4.00	0.00	63.95	16.36	50.05	45.95	126.29	21.88	125.20	297.53	81.28	419.16
augustus_masked-tulip_contig_40_pilon_pilon-processed-gene-0.49-mRNA-1	0.00	0.00	0.00	6.00	1.00	1.00	0.00	0.00	0.00	0.00	0.00	0.00	2.00	0.00	0.00	0.00	0.00	0.00
maker-tulip_contig_620_pilon_pilon-augustus-gene-3.19-mRNA-1	0.00	0.00	0.00	0.00	0.00	0.00	0.00	0.00	0.00	0.00	0.00	0.00	0.00	0.00	0.00	60.00	33.00	44.00
maker-tulip_contig_81_pilon_pilon-augustus-gene-3.6-mRNA-1	342.00	357.00	324.00	646.00	665.00	669.00	364.00	267.00	217.00	721.00	688.00	649.00	1070.00	137.00	656.00	489.00	181.00	518.00
augustus_masked-tulip_contig_378_pilon_pilon-processed-gene-3.30-mRNA-1	2.00	2.00	6.00	5.00	3.00	9.00	2.00	2.00	2.00	16.00	17.00	24.00	10.00	3.00	12.00	8.00	2.00	6.00
maker-tulip_contig_916_pilon_pilon-augustus-gene-2.12-mRNA-1	0.00	0.00	0.00	119.00	138.00	138.00	57.00	182.00	23.00	2.00	4.00	1.00	0.00	0.00	0.00	0.00	0.00	0.00
maker-tulip_contig_372_pilon_pilon-augustus-gene-1.18-mRNA-1	140.00	154.00	127.00	119.00	183.00	129.00	152.00	278.00	58.00	148.00	118.00	123.00	823.00	88.00	665.00	389.00	133.00	340.00
maker-tulip_contig_407_pilon_pilon-augustus-gene-5.30-mRNA-1	79.00	49.00	57.00	112.00	116.00	129.00	116.00	112.00	88.00	60.00	37.00	30.00	600.00	77.00	331.00	86.00	32.00	75.00
maker-tulip_contig_24_pilon_pilon-augustus-gene-0.56-mRNA-1	0.00	0.00	0.00	0.00	0.00	0.00	0.00	0.00	0.00	0.00	0.00	0.00	1.00	0.00	0.00	0.00	0.00	0.00
maker-tulip_contig_584_pilon_pilon-augustus-gene-2.2-mRNA-1	257.00	124.00	214.00	177.00	194.00	179.00	272.00	227.00	175.00	101.00	54.00	95.00	497.00	62.00	319.00	30.00	20.00	40.00
augustus_masked-tulip_contig_801_pilon_pilon-processed-gene-0.4-mRNA-1	0.00	0.00	0.00	2.00	0.00	2.00	1.00	0.00	0.00	3.41	3.19	5.32	3.00	1.00	0.00	2.00	0.00	1.51
augustus_masked-tulip_contig_675_pilon_pilon-processed-gene-0.27-mRNA-1	34.00	42.00	25.00	109.00	161.00	78.00	127.00	87.00	60.00	56.00	78.00	77.00	699.00	109.00	465.00	100.00	43.00	84.00
maker-tulip_contig_59_pilon_pilon-augustus-gene-1.87-mRNA-1	183.00	169.00	176.00	418.00	284.00	327.00	170.00	100.00	116.00	429.00	424.00	497.00	516.00	69.00	372.00	347.00	120.00	336.00
augustus_masked-tulip_contig_283_pilon_pilon-processed-gene-3.20-mRNA-1	0.00	0.00	0.00	5.00	4.00	1.00	6.00	2.00	1.00	6.00	1.00	2.00	11.00	1.00	5.00	3.00	2.00	4.00
maker-tulip_contig_121_pilon_pilon-augustus-gene-4.58-mRNA-1	275.00	185.00	232.00	432.00	292.00	309.00	91.00	91.00	60.00	271.00	299.00	315.00	673.00	88.00	580.00	605.00	376.00	831.00
maker-tulip_contig_868_pilon_pilon-augustus-gene-0.41-mRNA-1	1.00	0.00	1.00	10.00	9.00	9.00	15.00	7.00	16.00	67.00	36.00	45.00	13.00	2.00	13.00	11.00	10.00	14.00
maker-tulip_contig_603_pilon_pilon-augustus-gene-3.89-mRNA-1	443.00	472.00	444.00	480.00	591.00	603.00	767.00	803.00	507.00	508.00	382.00	392.00	1844.00	270.00	1167.00	273.00	127.00	307.00
augustus_masked-tulip_contig_302_pilon_pilon-processed-gene-0.30-mRNA-1	0.00	2.00	1.00	0.00	7.00	2.00	0.00	0.00	1.00	0.00	1.00	0.00	1.00	1.00	0.00	0.00	1.00	0.00
augustus_masked-tulip_contig_784_pilon_pilon-processed-gene-0.31-mRNA-1	0.00	0.00	0.00	0.00	1.00	0.00	2.00	0.00	1.00	0.00	0.00	0.00	0.00	0.00	0.00	0.00	0.00	0.00
augustus_masked-tulip_contig_847_pilon_pilon-processed-gene-0.5-mRNA-1	0.00	0.00	0.00	0.00	0.00	0.00	0.00	0.00	0.00	0.00	0.00	0.00	0.00	0.00	0.00	0.00	0.00	0.00
augustus_masked-tulip_contig_121_pilon_pilon-processed-gene-0.55-mRNA-1	1.00	2.00	0.00	7.00	3.00	5.00	2.00	0.00	1.00	0.00	0.00	0.00	3.00	0.00	0.00	3.00	1.00	0.00
maker-tulip_contig_270_pilon_pilon-augustus-gene-3.43-mRNA-1	1.00	0.00	0.00	0.00	0.00	0.00	0.00	0.00	0.00	0.00	0.00	0.00	0.00	0.00	1.00	7.00	1.00	18.00
maker-tulip_contig_69_pilon_pilon-augustus-gene-1.4-mRNA-1	0.00	0.00	0.00	1.00	2.00	0.00	0.00	0.00	0.00	0.00	0.00	0.00	17.00	1.00	10.00	0.00	0.00	0.00
maker-tulip_contig_281_pilon_pilon-augustus-gene-1.20-mRNA-1	2040.00	1703.00	1914.00	664.00	730.00	664.00	658.00	692.00	416.00	4607.00	2465.00	3115.00	1976.00	234.00	1143.00	602.00	289.00	677.00
maker-tulip_contig_138_pilon_pilon-augustus-gene-0.53-mRNA-1	0.00	0.00	0.00	0.00	0.00	0.00	0.00	0.00	0.00	0.00	0.00	0.00	4.00	0.00	1.00	1.00	2.00	1.00
maker-tulip_contig_43_pilon_pilon-augustus-gene-2.8-mRNA-1	4.00	6.00	7.00	1.00	0.00	2.00	1.00	1.00	0.00	5.00	2.00	2.00	61.00	9.00	44.00	0.00	0.00	0.00
augustus_masked-tulip_contig_490_pilon_pilon-processed-gene-2.77-mRNA-1	0.00	0.00	0.00	9.00	5.73	4.38	2.23	2.00	2.13	1.26	0.00	1.42	12.18	0.00	4.83	0.00	3.03	0.00
maker-tulip_contig_217_pilon_pilon-augustus-gene-3.30-mRNA-1	0.00	0.00	0.00	0.00	2.00	3.00	1.00	0.00	0.00	3.00	0.00	0.00	0.00	0.00	0.00	0.00	0.00	0.00
maker-tulip_contig_2_pilon_pilon-augustus-gene-5.62-mRNA-1	0.00	0.00	0.00	0.00	1.00	1.00	12.00	0.00	7.00	259.00	231.00	272.00	9.00	0.00	2.00	36.00	3.00	2.00
augustus_masked-tulip_contig_181_pilon_pilon-processed-gene-0.6-mRNA-1	0.00	0.00	0.00	0.00	0.00	0.00	0.00	0.00	0.00	0.00	0.00	0.00	0.00	0.00	0.00	27.00	19.00	24.00
augustus_masked-tulip_contig_290_pilon_pilon-processed-gene-1.33-mRNA-1	0.00	0.00	0.00	0.00	0.00	0.00	0.00	0.00	0.00	0.00	0.00	0.00	0.00	0.00	0.00	0.00	0.00	0.00
maker-tulip_contig_211_pilon_pilon-augustus-gene-1.86-mRNA-1	158.00	82.00	113.00	314.00	305.00	251.00	261.00	215.00	139.00	319.00	179.00	268.00	711.00	79.00	333.00	332.00	113.00	584.00
augustus_masked-tulip_contig_468_pilon_pilon-processed-gene-3.120-mRNA-1	354.00	281.00	243.00	800.00	817.00	739.00	768.00	596.00	401.00	260.00	209.00	252.00	1847.00	171.00	1025.00	1289.00	295.00	1356.00
augustus_masked-tulip_contig_199_pilon_pilon-processed-gene-3.18-mRNA-1	291.00	161.00	426.00	362.00	407.00	422.00	503.00	325.00	277.00	1235.00	718.00	1032.00	1267.00	167.00	727.00	343.00	149.00	484.00
maker-tulip_contig_691_pilon_pilon-augustus-gene-4.71-mRNA-1	0.00	0.00	0.00	4.00	1.00	1.00	18.00	7.00	16.00	1.00	0.00	1.00	0.00	0.00	2.00	2.00	0.00	0.00
maker-tulip_contig_263_pilon_pilon-augustus-gene-0.5-mRNA-1	49.00	33.00	66.00	109.00	147.00	125.00	131.00	140.00	73.00	99.00	119.00	78.00	413.00	52.00	287.00	429.00	118.00	324.00
maker-tulip_contig_272_pilon_pilon-augustus-gene-5.57-mRNA-1	160.00	128.00	147.00	356.00	418.00	385.00	240.00	358.00	166.00	38.00	29.00	43.00	320.00	47.00	196.00	63.00	19.00	49.00
augustus_masked-tulip_contig_33_pilon_pilon-processed-gene-1.2-mRNA-1	0.00	7.71	0.00	4.00	3.00	0.00	6.54	4.22	0.00	0.27	0.19	0.00	17.10	3.20	10.49	0.59	0.00	11.00
augustus_masked-tulip_contig_478_pilon_pilon-processed-gene-0.13-mRNA-1	0.00	0.00	0.00	0.00	0.00	0.00	0.00	0.00	0.00	2.00	0.00	0.00	0.00	0.00	1.00	1.00	0.00	0.00
augustus_masked-tulip_contig_819_pilon_pilon-processed-gene-1.20-mRNA-1	0.00	0.00	0.00	0.00	0.00	2.41	0.00	0.00	0.00	0.00	0.00	0.00	0.00	0.00	0.00	0.00	0.00	0.00
maker-tulip_contig_691_pilon_pilon-augustus-gene-0.13-mRNA-1	406.00	372.00	415.00	85.00	88.00	64.00	68.00	47.00	38.00	88.00	97.00	99.00	488.00	82.00	380.00	75.00	18.00	55.00
maker-tulip_contig_2_pilon_pilon-augustus-gene-2.43-mRNA-1	4973.00	8593.00	3366.00	150.00	57.00	63.00	116.00	146.00	90.00	67.00	31.00	50.00	23465.00	3494.00	21106.00	299.00	129.00	277.00
maker-tulip_contig_133_pilon_pilon-augustus-gene-1.24-mRNA-1	0.00	0.00	0.00	1.00	0.00	0.00	1.00	0.00	0.00	2.00	5.00	5.00	0.00	0.00	1.00	22.00	19.00	24.00
augustus_masked-tulip_contig_774_pilon_pilon-processed-gene-0.11-mRNA-1	0.00	0.00	0.00	0.00	0.00	0.00	0.00	0.00	1.00	2.00	0.00	1.00	0.00	0.00	0.00	0.00	0.00	2.00
augustus_masked-tulip_contig_801_pilon_pilon-processed-gene-0.5-mRNA-1	2.00	0.00	0.00	0.00	0.00	0.00	0.00	0.00	0.00	0.00	0.00	0.00	0.00	0.00	0.00	0.00	0.00	0.00
maker-tulip_contig_689_pilon_pilon-augustus-gene-3.8-mRNA-1	0.00	0.00	0.00	3.00	6.00	5.00	7.00	6.00	1.00	2.00	0.00	0.00	5.00	0.00	1.00	7.00	0.00	2.00
augustus_masked-tulip_contig_36_pilon_pilon-processed-gene-0.10-mRNA-1	0.00	0.00	0.00	0.00	0.00	0.00	0.49	0.00	0.00	0.00	0.00	0.00	12.14	1.31	0.00	0.00	0.00	0.53
augustus_masked-tulip_contig_905_pilon_pilon-processed-gene-0.13-mRNA-1	0.00	0.00	0.00	0.00	0.00	0.00	0.00	0.00	0.00	2.00	0.00	0.00	0.00	0.00	0.00	0.00	0.00	0.00
augustus_masked-tulip_contig_220_pilon_pilon-processed-gene-0.42-mRNA-1	0.50	0.00	3.00	0.00	2.27	0.00	7.77	5.00	4.06	3.74	3.00	5.58	4.82	2.97	5.75	24.00	2.97	17.63
maker-tulip_contig_677_pilon_pilon-augustus-gene-0.11-mRNA-1	93.00	96.00	75.00	96.00	139.00	105.00	68.00	54.00	45.00	383.00	372.00	456.00	436.00	72.00	342.00	158.00	74.00	189.00
maker-tulip_contig_320_pilon_pilon-augustus-gene-1.2-mRNA-1	14.00	21.00	9.00	134.00	61.00	121.00	135.00	128.00	86.00	7.00	2.00	3.00	224.00	26.00	138.00	62.00	8.00	37.00
maker-tulip_contig_424_pilon_pilon-augustus-gene-2.60-mRNA-1	2503.00	1484.00	2218.00	2451.00	2754.00	2656.00	2786.00	2464.00	1802.00	13055.00	9631.00	11748.00	5845.00	788.00	3328.00	1623.00	678.00	1648.00
augustus_masked-tulip_contig_659_pilon_pilon-processed-gene-1.24-mRNA-1	10.00	11.00	3.00	47.00	74.00	42.00	46.00	14.00	27.00	55.00	26.00	32.00	74.00	9.00	38.00	20.00	10.00	20.00
augustus_masked-tulip_contig_287_pilon_pilon-processed-gene-1.152-mRNA-1	320.00	343.00	332.00	321.00	274.00	315.00	263.00	146.00	158.00	317.00	280.00	284.00	1101.00	176.00	726.00	275.00	136.00	289.00
maker-tulip_contig_837_pilon_pilon-augustus-gene-2.11-mRNA-1	299.00	323.00	351.00	650.00	594.00	591.00	451.00	274.00	310.00	671.00	672.00	668.00	1439.00	172.00	941.00	740.00	379.00	970.00
augustus_masked-tulip_contig_555_pilon_pilon-processed-gene-2.136-mRNA-1	679.00	827.00	836.00	328.00	290.00	382.00	305.00	312.00	241.00	380.00	287.00	344.00	1178.00	168.00	919.00	352.00	122.00	293.00
maker-tulip_contig_451_pilon_pilon-augustus-gene-1.43-mRNA-1	29.00	15.00	12.00	64.00	65.00	60.00	138.00	143.00	96.00	266.00	220.00	215.00	658.00	87.00	381.00	221.00	56.00	144.00
maker-tulip_contig_2_pilon_pilon-augustus-gene-3.6-mRNA-1	935.00	560.00	704.00	265.00	327.00	290.00	535.00	508.00	343.00	137.00	105.00	132.00	615.00	92.00	391.00	107.00	35.00	59.00
maker-tulip_contig_381_pilon_pilon-augustus-gene-0.71-mRNA-1	263.00	153.00	195.00	265.00	296.00	293.00	276.00	390.00	265.00	104.00	85.00	130.00	322.00	41.00	229.00	98.00	30.00	92.00
maker-tulip_contig_323_pilon_pilon-augustus-gene-2.21-mRNA-1	4.00	3.00	3.00	87.00	181.00	106.00	21.00	13.00	19.00	11.00	14.00	9.00	111.00	19.00	147.00	25.00	7.00	12.00
augustus_masked-tulip_contig_515_pilon_pilon-processed-gene-2.43-mRNA-1	0.00	0.00	0.00	0.00	0.00	0.00	0.00	0.00	0.00	0.00	0.00	0.00	0.00	0.00	1.00	0.00	0.00	2.00
maker-tulip_contig_667_pilon_pilon-augustus-gene-0.152-mRNA-1	3.00	1.00	0.00	5.00	1.00	6.00	28.00	23.00	14.00	1837.00	1055.00	1714.00	205.00	30.00	75.00	120.00	25.00	72.00
augustus_masked-tulip_contig_318_pilon_pilon-processed-gene-0.69-mRNA-1	215.00	155.00	181.00	74.00	95.00	109.00	65.00	90.00	35.00	146.00	78.00	126.00	155.00	26.00	100.00	109.00	36.00	154.00
maker-tulip_contig_4_pilon_pilon-augustus-gene-0.2-mRNA-1	0.00	0.00	0.00	7.00	8.00	5.00	2.00	2.00	0.00	0.00	1.00	0.00	0.00	0.00	0.00	0.00	1.00	2.00
maker-tulip_contig_336_pilon_pilon-augustus-gene-0.64-mRNA-1	20.00	19.00	9.00	22.00	19.00	20.00	28.00	25.00	12.00	19.00	7.00	10.00	51.00	4.00	31.00	35.00	3.00	25.00
maker-tulip_contig_872_pilon_pilon-augustus-gene-0.39-mRNA-1	6.00	7.00	8.00	30.00	35.00	32.00	7.00	19.00	23.00	107.00	56.00	94.00	97.00	14.00	50.00	40.00	16.00	31.00
maker-tulip_contig_60_pilon_pilon-augustus-gene-0.14-mRNA-1	0.00	0.00	0.00	0.00	0.00	0.00	0.00	0.00	0.00	0.00	0.00	0.00	0.00	0.00	0.00	0.00	0.00	0.00
augustus_masked-tulip_contig_711_pilon_pilon-processed-gene-2.24-mRNA-1	269.00	382.00	217.00	35.00	40.00	23.00	24.00	18.00	19.00	53.00	52.00	53.00	1517.00	202.00	1096.00	38.00	9.00	28.00
maker-tulip_contig_190_pilon_pilon-augustus-gene-3.34-mRNA-1	35.00	22.00	35.00	37.00	61.00	45.00	43.00	33.00	30.00	93.00	69.00	80.00	323.00	55.00	143.00	15.00	10.00	13.00
maker-tulip_contig_381_pilon_pilon-augustus-gene-0.142-mRNA-1	0.00	0.00	3.00	0.00	1.00	0.00	0.00	0.00	0.00	0.00	0.00	1.00	0.00	0.00	0.00	3.00	2.00	6.00
maker-tulip_contig_351_pilon_pilon-augustus-gene-1.43-mRNA-1	0.00	9.32	2.29	0.00	4.00	0.00	3.76	9.98	0.00	2.63	1.96	6.28	1.85	0.00	0.00	3.85	0.00	2.89
maker-tulip_contig_2_pilon_pilon-augustus-gene-4.1-mRNA-1	0.00	0.00	0.00	0.00	0.00	0.00	0.00	0.00	0.00	0.00	0.00	0.00	1.00	0.00	0.00	27.00	16.00	30.00
maker-tulip_contig_704_pilon_pilon-augustus-gene-0.1-mRNA-1	0.00	0.00	0.00	0.00	0.00	0.00	0.00	0.00	0.00	0.00	0.00	0.00	0.00	0.00	0.00	0.00	0.00	0.00
augustus_masked-tulip_contig_145_pilon_pilon-processed-gene-4.2-mRNA-1	0.00	0.00	0.00	140.00	164.00	146.00	345.00	297.00	182.00	328.00	140.00	194.00	106.00	11.00	41.00	240.00	130.00	258.00
augustus_masked-tulip_contig_43_pilon_pilon-processed-gene-2.30-mRNA-1	0.00	0.00	0.00	0.00	0.00	0.00	0.00	0.00	0.00	1.00	0.00	0.00	0.00	1.00	0.00	0.00	0.00	0.00
augustus_masked-tulip_contig_176_pilon_pilon-processed-gene-0.37-mRNA-1	0.00	0.00	0.00	0.00	1.00	0.00	0.00	0.00	0.00	2.00	0.00	0.00	0.00	0.00	0.00	0.00	1.00	0.00
maker-tulip_contig_693_pilon_pilon-augustus-gene-1.21-mRNA-1	2.00	1.00	1.00	40.00	29.00	41.00	34.00	19.00	26.00	24.00	18.00	16.00	19.00	2.00	9.00	11.00	1.00	4.00
augustus_masked-tulip_contig_636_pilon_pilon-processed-gene-0.11-mRNA-1	4.00	11.00	11.00	0.00	0.00	0.00	0.00	0.00	0.00	0.00	0.00	0.00	59.00	8.00	59.00	0.00	0.00	0.00
maker-tulip_contig_881_pilon_pilon-augustus-gene-1.41-mRNA-1	0.00	10.00	0.00	2.00	5.00	0.00	9.00	0.00	7.00	2.00	4.00	1.00	29.00	4.00	53.00	76.00	21.00	50.00
augustus_masked-tulip_contig_623_pilon_pilon-processed-gene-1.88-mRNA-1	0.00	0.00	0.00	0.00	0.00	0.00	0.00	0.00	3.54	4.91	0.00	7.80	14.09	0.00	0.00	0.00	0.00	6.59
maker-tulip_contig_881_pilon_pilon-augustus-gene-1.33-mRNA-1	0.00	0.00	0.00	87.00	54.00	48.00	132.00	33.00	53.00	0.00	0.00	0.00	0.00	0.00	0.00	0.00	0.00	0.00
maker-tulip_contig_620_pilon_pilon-augustus-gene-2.16-mRNA-1	0.00	0.00	0.00	0.00	0.00	0.00	0.00	0.00	0.00	0.00	0.00	0.00	3.00	2.00	4.00	1.00	0.00	2.00
maker-tulip_contig_697_pilon_pilon-augustus-gene-1.20-mRNA-1	159.00	142.00	141.00	79.00	64.00	76.00	79.00	97.00	58.00	58.00	43.00	36.00	308.00	43.00	203.00	12.00	9.00	16.00
maker-tulip_contig_290_pilon_pilon-augustus-gene-5.5-mRNA-1	12.00	10.00	5.00	77.00	50.00	85.00	82.00	125.00	49.00	31.00	16.00	22.00	97.00	6.00	43.00	38.00	18.00	39.00
maker-tulip_contig_58_pilon_pilon-augustus-gene-4.28-mRNA-1	698.00	468.00	645.00	791.00	874.00	811.00	259.00	222.00	222.00	1629.00	1211.00	1736.00	2337.00	379.00	1548.00	667.00	249.00	590.00
maker-tulip_contig_58_pilon_pilon-augustus-gene-5.17-mRNA-1	74.00	37.00	69.00	67.00	75.00	62.00	90.00	80.00	100.00	97.00	85.00	73.00	165.00	24.00	111.00	74.00	39.00	84.00
maker-tulip_contig_490_pilon_pilon-augustus-gene-1.27-mRNA-1	2.00	11.00	5.00	22.00	18.00	21.00	3.00	6.00	5.00	6.00	8.00	6.00	2.00	1.00	3.00	0.00	0.00	1.00
augustus_masked-tulip_contig_194_pilon_pilon-processed-gene-1.39-mRNA-1	7.00	5.00	2.00	5.00	5.00	6.00	0.00	3.00	0.00	4.00	4.00	0.00	6.00	0.00	1.00	32.00	25.00	22.00
augustus_masked-tulip_contig_661_pilon_pilon-processed-gene-1.60-mRNA-1	0.00	0.00	0.00	0.00	0.00	0.00	0.00	0.00	0.00	0.00	0.00	0.00	0.00	0.00	0.00	0.00	0.00	0.00
maker-tulip_contig_376_pilon_pilon-augustus-gene-0.35-mRNA-1	12761.00	12109.00	11638.00	8141.00	9082.00	8831.00	11574.00	11724.00	7016.00	7049.00	4829.00	5548.00	8848.00	1602.00	6185.00	2434.00	995.00	2455.00
maker-tulip_contig_7_pilon_pilon-augustus-gene-0.18-mRNA-1	0.00	0.00	0.00	0.00	0.00	0.00	0.00	0.00	0.00	0.00	0.00	0.00	0.00	0.00	0.00	0.00	0.00	0.00
maker-tulip_contig_860_pilon_pilon-augustus-gene-1.13-mRNA-1	4447.00	3638.00	4164.00	3329.00	3786.00	3383.00	2710.00	2165.00	1898.00	4759.00	4021.00	5155.00	11324.00	1538.00	6538.00	3526.00	1313.00	4014.00
augustus_masked-tulip_contig_176_pilon_pilon-processed-gene-0.52-mRNA-1	46.64	46.31	67.07	55.34	41.09	91.23	19.53	22.00	10.00	10.33	5.91	19.74	23.98	0.00	0.00	21.91	3.04	7.00
maker-tulip_contig_674_pilon_pilon-augustus-gene-6.2-mRNA-1	0.00	0.00	0.00	1.00	1.00	3.00	2.00	1.00	1.00	0.00	0.00	5.00	2.00	0.00	0.00	0.00	0.00	2.00
maker-tulip_contig_586_pilon_pilon-augustus-gene-4.43-mRNA-1	0.00	0.00	0.00	1.00	0.00	1.00	2.00	0.00	0.00	2.00	1.00	0.00	11.00	4.00	16.00	16.00	4.00	23.00
maker-tulip_contig_80_pilon_pilon-augustus-gene-0.70-mRNA-1	876.00	688.00	748.00	332.00	407.00	341.00	364.00	429.00	300.00	235.00	200.00	216.00	1012.00	140.00	591.00	77.00	33.00	72.00
maker-tulip_contig_287_pilon_pilon-augustus-gene-1.120-mRNA-1	4544.00	5181.00	5788.00	2082.00	2254.00	2293.00	1391.00	1401.00	975.00	1081.00	913.00	981.00	2659.00	283.00	1427.00	2990.00	637.00	2380.00
maker-tulip_contig_526_pilon_pilon-augustus-gene-0.14-mRNA-1	33.00	60.00	39.00	165.00	68.00	85.00	344.00	231.00	183.00	14.00	11.00	14.00	882.00	94.00	563.00	383.00	76.00	215.00
augustus_masked-tulip_contig_932_pilon_pilon-processed-gene-0.0-mRNA-1	0.00	1.00	0.00	0.00	0.00	0.00	0.00	0.00	0.00	1.00	0.00	0.00	1.00	0.00	0.00	0.00	0.00	1.00
augustus_masked-tulip_contig_859_pilon_pilon-processed-gene-0.64-mRNA-1	0.00	1.00	0.00	0.00	0.00	4.00	0.00	0.00	1.00	1.00	0.00	0.00	0.00	0.00	1.00	0.00	2.00	0.00
maker-tulip_contig_31_pilon_pilon-augustus-gene-1.55-mRNA-1	2.00	0.00	2.20	0.00	1.00	0.00	0.00	2.00	0.00	0.00	3.00	3.00	4.26	0.00	4.38	3.16	3.00	0.00
augustus_masked-tulip_contig_819_pilon_pilon-processed-gene-2.38-mRNA-1	305.00	203.00	251.00	586.00	535.00	534.00	300.00	224.00	209.00	816.00	608.00	749.00	1100.00	144.00	659.00	310.00	121.00	284.00
maker-tulip_contig_132_pilon_pilon-augustus-gene-0.0-mRNA-1	0.00	0.00	0.00	0.00	0.00	0.00	3.00	2.00	0.00	1.00	1.00	0.00	148.00	10.00	80.00	85.00	81.00	204.00
maker-tulip_contig_196_pilon_pilon-augustus-gene-5.40-mRNA-1	0.00	0.00	0.00	6.00	14.00	13.00	9.00	18.00	3.00	11.00	3.00	4.00	95.00	10.00	38.00	57.00	18.00	87.00
augustus_masked-tulip_contig_381_pilon_pilon-processed-gene-0.42-mRNA-1	1.00	0.00	0.00	5.00	5.00	6.00	4.00	7.00	3.00	4.00	2.00	1.00	7.00	1.00	9.00	9.00	1.00	5.00
maker-tulip_contig_182_pilon_pilon-augustus-gene-1.63-mRNA-1	0.00	0.00	0.00	155.00	183.00	118.00	67.00	40.00	48.00	5.00	3.00	2.00	3.00	0.00	5.00	6.00	2.00	7.00
maker-tulip_contig_490_pilon_pilon-augustus-gene-2.39-mRNA-1	114.00	97.00	73.00	898.00	896.00	898.00	120.00	116.00	102.00	181.00	258.00	226.00	891.00	98.00	472.00	306.00	174.00	350.00
augustus_masked-tulip_contig_257_pilon_pilon-processed-gene-1.3-mRNA-1	0.00	0.00	0.00	0.00	0.00	0.00	0.00	0.00	0.00	2.00	0.00	0.00	0.00	0.00	0.00	0.00	0.00	0.00
maker-tulip_contig_586_pilon_pilon-augustus-gene-12.0-mRNA-1	6.00	6.00	0.00	12.00	14.00	14.00	10.00	14.00	4.00	30.00	10.00	18.00	6.00	2.00	5.00	2.00	4.00	6.00
maker-tulip_contig_699_pilon_pilon-augustus-gene-0.7-mRNA-1	0.00	4.00	0.00	0.00	1.00	1.00	0.00	1.00	0.00	0.00	1.00	1.00	1.00	0.00	1.00	0.00	0.00	0.00
maker-tulip_contig_837_pilon_pilon-augustus-gene-0.0-mRNA-1	0.00	0.00	0.00	0.00	0.00	0.00	0.00	0.00	0.00	0.00	0.00	0.00	0.00	0.00	0.00	53.00	51.00	99.00
augustus_masked-tulip_contig_598_pilon_pilon-processed-gene-0.20-mRNA-1	69.00	84.00	91.00	79.00	103.00	102.00	99.00	97.00	71.00	67.00	31.00	36.00	54.00	6.00	28.00	68.00	24.00	53.00
maker-tulip_contig_362_pilon_pilon-augustus-gene-6.3-mRNA-1	190.00	124.00	170.00	1406.00	1728.00	1585.00	264.00	242.00	173.00	224.00	135.00	210.00	273.00	35.00	145.00	211.00	61.00	160.00
maker-tulip_contig_807_pilon_pilon-augustus-gene-3.40-mRNA-1	4964.00	3636.00	4976.00	1613.00	1702.00	1889.00	1901.00	1505.00	1334.00	1843.00	1688.00	1958.00	4245.00	519.00	2235.00	913.00	343.00	972.00
maker-tulip_contig_626_pilon_pilon-augustus-gene-0.25-mRNA-1	23.95	10.85	14.54	0.00	1.90	3.32	4.55	2.83	1.10	0.00	1.77	3.30	3008.07	312.17	1937.92	3.45	4.25	10.66
augustus_masked-tulip_contig_506_pilon_pilon-processed-gene-1.7-mRNA-1	1.00	0.00	0.00	87.00	74.00	54.00	99.00	49.00	69.00	10.00	14.00	8.00	216.00	20.00	63.00	220.00	26.00	92.00
augustus_masked-tulip_contig_339_pilon_pilon-processed-gene-3.6-mRNA-1	0.00	3.00	0.00	0.00	8.00	2.00	21.00	15.00	27.00	70.00	35.00	82.00	53.00	7.00	43.00	15.00	12.00	41.00
maker-tulip_contig_907_pilon_pilon-augustus-gene-2.14-mRNA-1	2.00	4.00	5.00	64.00	54.00	55.00	26.00	41.00	21.00	30.00	32.00	34.00	264.00	46.00	120.00	80.00	35.00	104.00
augustus_masked-tulip_contig_224_pilon_pilon-processed-gene-2.11-mRNA-1	1.71	14.46	0.00	0.00	0.00	0.02	1.85	0.00	0.00	0.00	0.00	0.00	0.00	0.00	7.76	0.00	0.00	0.00
maker-tulip_contig_69_pilon_pilon-augustus-gene-2.19-mRNA-1	0.00	2.00	0.00	0.00	0.00	0.00	0.00	1.00	0.00	0.00	0.00	0.00	1.00	0.00	0.00	0.00	0.00	0.00
augustus_masked-tulip_contig_505_pilon_pilon-processed-gene-0.31-mRNA-1	0.00	0.00	0.00	0.00	0.00	0.00	0.00	0.00	0.00	1.00	0.00	1.00	3.00	0.00	0.00	0.00	0.00	1.00
maker-tulip_contig_448_pilon_pilon-augustus-gene-2.36-mRNA-1	0.00	0.00	0.00	0.00	0.00	0.00	0.00	2.00	0.00	1.00	0.00	0.00	1.00	0.00	0.00	0.00	0.00	0.00
augustus_masked-tulip_contig_429_pilon_pilon-processed-gene-0.5-mRNA-1	0.00	0.00	0.00	0.00	0.00	0.00	0.00	0.00	1.00	0.00	0.00	0.00	0.00	0.00	0.00	0.00	0.00	0.00
maker-tulip_contig_345_pilon_pilon-augustus-gene-0.18-mRNA-1	0.00	0.00	0.00	6.00	10.00	2.00	25.00	11.00	10.00	0.00	0.00	0.00	10.00	3.00	8.00	15.00	5.00	6.00
augustus_masked-tulip_contig_190_pilon_pilon-processed-gene-1.14-mRNA-1	393.00	318.00	358.00	106.00	157.00	139.00	95.00	133.00	67.00	224.00	201.00	270.00	492.00	62.00	317.00	107.00	59.00	169.00
maker-tulip_contig_271_pilon_pilon-augustus-gene-1.61-mRNA-1	198.00	250.00	162.00	451.00	474.00	456.00	255.00	265.00	183.00	324.00	335.00	325.00	970.00	127.00	684.00	356.00	126.00	399.00
maker-tulip_contig_895_pilon_pilon-augustus-gene-3.0-mRNA-1	0.00	0.00	0.00	0.00	0.00	0.00	0.00	1.00	0.00	0.00	0.00	0.00	0.00	0.00	0.00	54.00	52.00	75.00
augustus_masked-tulip_contig_190_pilon_pilon-processed-gene-2.31-mRNA-1	351.00	300.00	335.00	80.00	93.00	82.00	92.00	99.00	80.00	86.00	78.00	79.00	445.00	48.00	362.00	38.00	15.00	50.00
augustus_masked-tulip_contig_474_pilon_pilon-processed-gene-0.139-mRNA-1	7.00	3.00	3.00	45.00	46.00	52.00	12.00	13.00	5.00	17.00	16.00	24.00	7.00	0.00	3.00	28.00	22.00	33.00
maker-tulip_contig_479_pilon_pilon-augustus-gene-0.8-mRNA-1	0.00	0.00	0.00	232.00	250.00	219.00	45.00	30.00	32.00	1.00	0.00	2.00	7.00	3.00	8.00	11.00	8.00	11.00
augustus_masked-tulip_contig_345_pilon_pilon-processed-gene-1.3-mRNA-1	42.00	26.00	27.00	21.00	18.00	16.00	12.00	23.00	5.00	10.00	6.00	14.00	14.00	0.00	11.00	6.00	2.00	3.00
augustus_masked-tulip_contig_855_pilon_pilon-processed-gene-1.1-mRNA-1	0.00	0.00	0.00	254.00	306.00	258.00	33.00	19.00	23.00	5.00	3.00	4.00	6.00	0.00	4.00	11.00	2.00	3.00
augustus_masked-tulip_contig_417_pilon_pilon-processed-gene-2.1-mRNA-1	0.00	0.00	5.44	1.00	1.01	3.42	0.00	2.34	0.00	0.00	2.47	2.00	1.03	0.00	2.00	0.00	0.00	0.00
augustus_masked-tulip_contig_7_pilon_pilon-processed-gene-0.9-mRNA-1	0.00	0.00	0.00	0.00	0.00	0.00	0.00	0.00	0.00	0.00	0.00	0.00	0.00	0.00	0.00	0.00	0.00	0.00
maker-tulip_contig_704_pilon_pilon-augustus-gene-2.11-mRNA-1	3.00	3.00	3.00	57.00	49.00	44.00	27.00	16.00	8.00	58.00	35.00	60.00	92.00	12.00	51.00	34.00	10.00	29.00
augustus_masked-tulip_contig_514_pilon_pilon-processed-gene-1.56-mRNA-1	153.70	156.57	137.28	7.89	9.15	5.25	9.72	16.71	7.05	10.24	2.53	6.80	32.17	0.00	12.06	2.47	7.86	2.24
maker-tulip_contig_498_pilon_pilon-augustus-gene-0.36-mRNA-1	16.00	11.00	8.00	12.00	17.00	15.00	14.00	15.00	10.00	44.00	27.00	25.00	108.00	6.00	72.00	28.00	13.00	32.00
augustus_masked-tulip_contig_661_pilon_pilon-processed-gene-1.56-mRNA-1	0.00	1.00	3.00	0.00	0.00	0.00	0.00	0.00	1.00	0.00	0.00	0.00	0.00	0.00	0.00	3.00	4.00	4.00
maker-tulip_contig_407_pilon_pilon-augustus-gene-0.90-mRNA-1	443.00	318.00	438.00	239.00	284.00	268.00	314.00	384.00	222.00	244.00	214.00	236.00	588.00	81.00	356.00	300.00	97.00	283.00
augustus_masked-tulip_contig_190_pilon_pilon-processed-gene-3.49-mRNA-1	0.00	0.00	1.00	0.00	0.00	2.00	3.00	5.00	3.00	0.00	0.00	0.00	11.00	1.00	7.00	1.00	0.00	0.00
maker-tulip_contig_477_pilon_pilon-augustus-gene-1.24-mRNA-1	0.00	0.00	0.00	5.00	7.00	10.00	16.00	15.00	13.00	61.00	23.00	23.00	14.00	0.00	7.00	15.00	6.00	15.00
maker-tulip_contig_187_pilon_pilon-augustus-gene-1.102-mRNA-1	0.00	0.00	1.00	1.00	0.00	0.00	0.00	0.00	0.00	1.00	0.00	0.00	0.00	0.00	0.00	0.00	0.00	0.00
augustus_masked-tulip_contig_926_pilon_pilon-processed-gene-0.42-mRNA-1	0.00	0.00	0.00	0.00	0.00	0.00	0.00	0.00	0.00	0.00	0.00	1.00	1.00	0.00	0.00	0.00	0.00	0.00
augustus_masked-tulip_contig_407_pilon_pilon-processed-gene-1.4-mRNA-1	0.00	0.00	0.00	2.00	4.00	3.00	0.00	1.00	0.00	0.00	0.00	1.00	0.00	0.00	1.00	0.00	0.00	0.00
maker-tulip_contig_710_pilon_pilon-augustus-gene-0.22-mRNA-1	0.00	0.00	0.00	0.00	0.00	5.00	159.00	173.00	207.00	0.00	0.00	0.00	0.00	0.00	0.00	0.00	0.00	0.00
maker-tulip_contig_407_pilon_pilon-augustus-gene-9.153-mRNA-1	29.00	64.00	56.00	118.00	120.00	130.00	68.00	74.00	47.00	131.00	132.00	89.00	291.00	39.00	230.00	263.00	118.00	302.00
maker-tulip_contig_456_pilon_pilon-augustus-gene-1.7-mRNA-1	108.00	153.00	148.00	92.00	100.00	76.00	32.00	44.00	30.00	107.00	96.00	109.00	269.00	33.00	161.00	50.00	12.00	47.00
maker-tulip_contig_507_pilon_pilon-augustus-gene-1.28-mRNA-1	354.00	553.00	374.00	507.00	533.00	501.00	386.00	329.00	262.00	507.00	470.00	462.00	1304.00	191.00	857.00	415.00	222.00	538.00
maker-tulip_contig_247_pilon_pilon-augustus-gene-1.0-mRNA-1	130.00	98.00	103.00	60.00	50.00	51.00	35.00	39.00	25.00	133.00	128.00	129.00	294.00	43.00	233.00	139.00	42.00	96.00
maker-tulip_contig_872_pilon_pilon-augustus-gene-0.24-mRNA-1	3662.00	3313.00	3921.00	996.00	1159.00	1178.00	1598.00	1696.00	1033.00	1163.00	785.00	931.00	3883.00	432.00	2158.00	716.00	297.00	746.00
maker-tulip_contig_323_pilon_pilon-augustus-gene-8.81-mRNA-1	299.00	274.00	370.00	438.00	468.00	489.00	459.00	491.00	388.00	290.00	306.00	351.00	989.00	130.00	439.00	399.00	221.00	598.00
maker-tulip_contig_530_pilon_pilon-augustus-gene-0.59-mRNA-1	341.00	250.00	349.00	207.00	224.00	198.00	84.00	94.00	50.00	179.00	142.00	155.00	317.00	50.00	178.00	71.00	32.00	91.00
maker-tulip_contig_702_pilon_pilon-augustus-gene-0.59-mRNA-1	684.00	721.00	724.00	294.00	309.00	283.00	167.00	164.00	137.00	284.00	324.00	308.00	1401.00	209.00	1066.00	197.00	87.00	196.00
maker-tulip_contig_344_pilon_pilon-augustus-gene-0.0-mRNA-1	572.00	377.00	333.00	35.00	50.00	45.00	43.00	40.00	26.00	37.00	36.00	39.00	9.00	1.00	12.00	9.00	5.00	15.00
augustus_masked-tulip_contig_70_pilon_pilon-processed-gene-0.63-mRNA-1	0.00	0.00	0.00	0.00	0.00	5.44	0.00	6.26	0.00	0.00	0.00	0.00	0.00	1.00	5.68	0.00	0.00	7.00
maker-tulip_contig_209_pilon_pilon-augustus-gene-0.12-mRNA-1	831.00	884.00	617.00	518.00	552.00	553.00	671.00	570.00	455.00	565.00	481.00	479.00	2311.00	310.00	1510.00	416.00	168.00	397.00
maker-tulip_contig_33_pilon_pilon-augustus-gene-3.33-mRNA-1	2807.00	4021.00	3733.00	2175.00	2747.00	3070.00	4103.00	3868.00	1914.00	2064.00	1431.00	1447.00	2031.00	310.00	1606.00	805.00	342.00	834.00
augustus_masked-tulip_contig_479_pilon_pilon-processed-gene-0.57-mRNA-1	3.00	1.00	1.00	1.00	0.00	1.00	0.00	0.00	0.00	13.00	8.00	12.00	7.00	0.00	1.00	2.00	1.00	3.00
maker-tulip_contig_76_pilon_pilon-augustus-gene-1.1-mRNA-1	1625.00	1658.00	1574.00	210.00	226.00	299.00	423.00	433.00	279.00	4140.00	4114.00	4189.00	1286.00	142.00	588.00	834.00	251.00	640.00
maker-tulip_contig_333_pilon_pilon-augustus-gene-1.35-mRNA-1	4.00	17.00	3.00	61.00	82.00	73.00	706.00	625.00	1101.00	592.00	555.00	684.00	859.00	127.00	804.00	577.00	226.00	649.00
augustus_masked-tulip_contig_640_pilon_pilon-processed-gene-1.9-mRNA-1	1.00	0.00	0.00	48.00	43.00	44.00	49.00	34.00	26.00	12.00	10.00	7.00	112.00	14.00	72.00	25.00	17.00	48.00
augustus_masked-tulip_contig_372_pilon_pilon-processed-gene-2.43-mRNA-1	5.00	0.00	0.00	183.00	132.00	134.00	107.00	72.00	48.00	1.00	0.00	0.00	30.00	1.00	10.00	40.00	22.00	24.00
augustus_masked-tulip_contig_473_pilon_pilon-processed-gene-2.26-mRNA-1	15.00	34.00	51.00	53.00	34.00	28.00	9.00	10.00	4.00	16.00	12.00	14.00	19.00	0.00	18.00	34.00	14.00	22.00
maker-tulip_contig_598_pilon_pilon-augustus-gene-0.70-mRNA-1	29.00	19.00	35.00	21.00	9.00	8.00	4.00	10.00	2.00	36.00	12.00	15.00	66.00	6.00	45.00	16.00	7.00	5.00
maker-tulip_contig_516_pilon_pilon-augustus-gene-0.0-mRNA-1	369.00	304.00	365.00	268.00	232.00	289.00	174.00	110.00	126.00	189.00	137.00	148.00	373.00	57.00	259.00	154.00	70.00	228.00
maker-tulip_contig_704_pilon_pilon-augustus-gene-2.4-mRNA-1	9.00	5.00	6.00	1.00	0.00	1.00	2.00	2.00	3.00	5.00	4.00	9.00	5.00	0.00	5.00	2.00	5.00	2.00
maker-tulip_contig_351_pilon_pilon-augustus-gene-1.67-mRNA-1	18.00	5.00	9.00	12.00	25.00	10.00	7.00	9.00	13.00	20.00	23.00	16.00	54.00	8.00	29.00	14.00	4.00	20.00
augustus_masked-tulip_contig_323_pilon_pilon-processed-gene-6.44-mRNA-1	7.00	10.00	7.00	9.00	7.00	12.00	7.00	4.00	6.00	38.00	23.00	35.00	294.00	37.00	165.00	9.00	5.00	6.00
maker-tulip_contig_104_pilon_pilon-augustus-gene-0.40-mRNA-1	4.00	3.00	3.00	11.00	18.00	17.00	9.00	6.00	12.00	24.00	14.00	22.00	27.00	5.00	19.00	15.00	7.00	15.00
maker-tulip_contig_888_pilon_pilon-augustus-gene-0.2-mRNA-1	0.00	0.00	0.00	0.00	0.00	0.00	0.00	1.00	2.00	18.00	23.00	9.00	2.00	1.00	2.00	1.00	0.00	2.00
augustus_masked-tulip_contig_529_pilon_pilon-processed-gene-1.68-mRNA-1	0.00	0.00	0.00	3.00	0.00	0.00	0.00	0.00	1.00	1.00	0.00	0.00	0.00	0.00	0.00	0.00	0.00	1.00
augustus_masked-tulip_contig_166_pilon_pilon-processed-gene-0.13-mRNA-1	19.00	7.00	1.99	0.00	0.00	0.00	0.00	1.00	0.00	0.00	0.00	1.00	7.78	1.00	4.00	0.00	0.00	0.00
maker-tulip_contig_2_pilon_pilon-augustus-gene-3.12-mRNA-1	779.00	419.00	559.00	660.00	712.00	680.00	607.00	538.00	409.00	412.00	387.00	436.00	1747.00	206.00	1067.00	892.00	279.00	802.00
maker-tulip_contig_654_pilon_pilon-augustus-gene-1.125-mRNA-1	34.00	17.00	32.00	614.00	469.00	595.00	552.00	375.00	288.00	155.00	102.00	152.00	530.00	61.00	278.00	424.00	167.00	519.00
augustus_masked-tulip_contig_109_pilon_pilon-processed-gene-0.48-mRNA-1	0.00	0.00	0.00	0.00	0.00	0.00	0.00	0.00	0.00	0.00	3.00	0.00	1.00	1.00	0.00	3.00	0.00	2.00
maker-tulip_contig_773_pilon_pilon-augustus-gene-1.24-mRNA-1	40.00	30.00	40.00	145.00	127.00	140.00	119.00	80.00	61.00	254.00	230.00	201.00	407.00	52.00	223.00	111.00	50.00	169.00
augustus_masked-tulip_contig_190_pilon_pilon-processed-gene-0.4-mRNA-1	0.00	0.00	2.00	1.00	3.00	1.00	1.00	1.00	0.00	0.00	0.00	0.00	0.00	0.00	0.00	0.00	0.00	0.00
augustus_masked-tulip_contig_318_pilon_pilon-processed-gene-2.19-mRNA-1	0.00	0.00	0.00	1.00	6.00	1.00	10.00	3.00	3.00	2.00	4.00	0.00	3.00	1.00	0.00	0.00	3.00	2.00
maker-tulip_contig_2_pilon_pilon-augustus-gene-5.41-mRNA-1	0.00	0.00	0.00	1.00	1.00	3.00	10.00	6.00	2.00	60.00	35.00	73.00	402.00	77.00	26.00	159.00	27.00	115.00
augustus_masked-tulip_contig_394_pilon_pilon-processed-gene-2.29-mRNA-1	0.00	0.00	0.00	0.00	0.00	0.00	0.00	0.00	0.00	0.00	0.00	0.00	0.00	0.00	0.00	70.00	41.00	60.00
maker-tulip_contig_211_pilon_pilon-augustus-gene-4.36-mRNA-1	9.00	4.00	6.00	64.00	58.00	56.00	48.00	37.00	33.00	62.00	53.00	64.00	204.00	45.00	92.00	47.00	22.00	63.00
maker-tulip_contig_809_pilon_pilon-augustus-gene-0.8-mRNA-1	0.00	0.00	0.00	0.00	0.00	0.00	0.00	0.00	0.00	0.00	0.00	0.00	0.00	0.00	0.00	8.00	3.00	7.00
maker-tulip_contig_572_pilon_pilon-augustus-gene-0.31-mRNA-1	5.00	2.00	3.00	0.00	2.00	0.00	1.00	0.00	1.00	0.00	1.00	0.00	0.00	0.00	1.00	1.00	0.00	1.00
augustus_masked-tulip_contig_465_pilon_pilon-processed-gene-0.130-mRNA-1	5.00	6.00	3.27	13.27	12.67	7.13	3.56	0.00	1.30	8.46	5.52	1.79	5.31	0.00	1.88	0.00	1.32	14.91
maker-tulip_contig_909_pilon_pilon-augustus-gene-0.42-mRNA-1	743.00	982.00	961.00	4694.00	4693.00	4821.00	3844.00	3250.00	2297.00	843.00	741.00	812.00	7544.00	742.00	2980.00	4030.00	1326.00	3799.00
maker-tulip_contig_103_pilon_pilon-augustus-gene-0.16-mRNA-1	0.00	3.00	0.00	184.00	60.00	137.00	37.00	14.00	19.00	21.00	34.00	23.00	47.00	8.00	27.00	59.00	31.00	49.00
augustus_masked-tulip_contig_806_pilon_pilon-processed-gene-2.12-mRNA-1	0.00	0.00	0.00	0.00	0.00	0.00	0.00	0.00	0.00	0.00	0.00	0.00	0.00	0.00	0.00	0.00	0.00	0.00
maker-tulip_contig_177_pilon_pilon-augustus-gene-1.27-mRNA-1	0.00	0.00	0.00	0.00	0.00	0.00	5.00	9.00	6.00	1137.00	1114.00	315.00	13.00	0.00	2.00	1.00	0.00	0.00
maker-tulip_contig_711_pilon_pilon-augustus-gene-1.20-mRNA-1	3.00	7.00	6.00	58.00	93.00	64.00	48.00	44.00	30.00	32.00	17.00	24.00	58.00	8.00	57.00	29.00	19.00	41.00
augustus_masked-tulip_contig_59_pilon_pilon-processed-gene-0.15-mRNA-1	0.00	0.00	0.00	0.00	0.00	0.00	0.00	0.00	0.00	0.00	0.00	0.00	0.00	0.00	0.00	0.00	0.00	0.00
maker-tulip_contig_178_pilon_pilon-augustus-gene-0.79-mRNA-1	673.99	619.00	667.00	281.00	380.00	369.58	422.00	523.00	260.00	322.00	313.00	251.43	1060.00	162.00	780.00	595.87	252.83	615.00
maker-tulip_contig_279_pilon_pilon-augustus-gene-0.5-mRNA-1	0.00	0.00	0.00	1.00	1.00	0.00	0.00	0.00	0.00	3.00	0.00	0.00	0.00	0.00	0.00	0.00	0.00	0.00
maker-tulip_contig_420_pilon_pilon-augustus-gene-2.40-mRNA-1	24.00	7.00	20.00	128.00	124.00	89.00	44.00	36.00	42.00	76.00	67.00	48.00	207.00	20.00	109.00	62.00	28.00	99.00
maker-tulip_contig_633_pilon_pilon-augustus-gene-0.78-mRNA-1	0.00	0.00	0.00	0.00	1.00	0.00	0.00	0.00	0.00	0.00	0.00	0.00	1.00	0.00	1.00	533.00	267.00	381.00
maker-tulip_contig_229_pilon_pilon-augustus-gene-0.13-mRNA-1	58.00	42.00	51.00	40.00	63.00	45.00	40.00	38.00	48.00	56.00	53.00	58.00	171.00	19.00	88.00	54.00	25.00	52.00
maker-tulip_contig_279_pilon_pilon-augustus-gene-0.24-mRNA-1	297.00	451.00	183.00	695.00	654.00	655.00	448.00	291.00	295.00	1869.00	2115.00	1618.00	1757.00	232.00	1307.00	7839.00	4825.00	10272.00
maker-tulip_contig_318_pilon_pilon-augustus-gene-2.8-mRNA-1	0.00	3.00	0.00	0.00	0.00	0.99	0.00	0.00	0.00	0.00	0.00	1.00	1.00	0.00	0.00	0.00	0.00	0.00
maker-tulip_contig_353_pilon_pilon-augustus-gene-0.22-mRNA-1	1418.00	1302.00	1194.04	941.83	780.24	922.23	563.19	431.54	438.01	1422.46	1253.00	1434.99	1822.01	238.00	1191.00	1089.73	444.00	1216.00
augustus_masked-tulip_contig_361_pilon_pilon-processed-gene-0.52-mRNA-1	461.00	664.00	610.00	548.00	805.00	619.00	342.00	617.00	266.00	834.00	681.00	799.00	2893.00	660.00	1749.00	782.00	564.00	1041.00
maker-tulip_contig_334_pilon_pilon-augustus-gene-0.25-mRNA-1	0.00	0.00	0.00	0.00	0.00	0.00	0.00	0.00	0.00	2.00	0.00	0.00	1.00	0.00	0.00	67.00	16.00	41.00
augustus_masked-tulip_contig_926_pilon_pilon-processed-gene-0.36-mRNA-1	0.00	1.00	1.00	0.00	0.00	0.00	0.00	0.00	0.00	0.00	0.00	0.00	0.00	0.00	1.00	1450.00	1117.00	2347.00
maker-tulip_contig_323_pilon_pilon-augustus-gene-2.10-mRNA-1	5.00	19.00	7.00	26.00	33.00	26.00	21.00	18.00	30.00	14.00	9.00	19.00	110.00	15.00	65.00	6.00	3.00	12.00
maker-tulip_contig_52_pilon_pilon-augustus-gene-0.5-mRNA-1	1355.00	1088.00	1168.00	646.00	615.00	625.00	459.00	370.00	269.00	1033.00	960.00	1058.00	1091.00	135.00	828.00	421.00	174.00	692.00
augustus_masked-tulip_contig_126_pilon_pilon-processed-gene-0.47-mRNA-1	129.51	84.54	96.29	2372.95	2726.45	2370.36	589.91	478.34	370.55	107.76	111.81	120.46	710.95	76.19	577.85	319.62	127.40	301.87
maker-tulip_contig_867_pilon_pilon-augustus-gene-3.40-mRNA-1	0.00	2.00	5.00	9.00	9.00	8.00	8.00	2.00	3.00	7.00	6.00	5.00	20.00	2.00	12.00	11.00	7.00	10.00
augustus_masked-tulip_contig_619_pilon_pilon-processed-gene-1.44-mRNA-1	69.00	118.00	56.00	55.00	52.00	58.00	49.00	19.00	22.00	30.00	12.00	17.00	1398.00	196.00	896.00	29.00	13.00	38.00
maker-tulip_contig_185_pilon_pilon-augustus-gene-0.20-mRNA-1	46.00	111.00	74.00	2086.00	2329.00	2021.00	319.00	244.00	261.00	158.00	161.00	149.00	390.00	40.00	262.00	304.00	111.00	301.00
maker-tulip_contig_327_pilon_pilon-augustus-gene-9.2-mRNA-1	632.74	667.20	840.39	264.26	295.78	338.25	288.56	199.20	194.62	672.03	639.95	625.36	368.91	47.98	227.55	133.50	65.13	117.74
augustus_masked-tulip_contig_623_pilon_pilon-processed-gene-4.26-mRNA-1	11.00	10.00	13.00	11.00	15.00	17.00	4.00	4.00	0.00	10.00	9.00	15.00	49.00	5.00	28.00	6.00	6.00	9.00
maker-tulip_contig_316_pilon_pilon-augustus-gene-1.55-mRNA-1	358.00	416.00	389.00	226.00	295.00	249.00	288.00	418.00	212.00	222.00	217.00	211.00	639.00	90.00	442.00	221.00	101.00	215.00
maker-tulip_contig_673_pilon_pilon-augustus-gene-1.30-mRNA-1	0.00	0.00	0.00	3.00	2.00	1.00	1.00	0.00	1.00	0.00	0.00	1.00	0.00	0.00	0.00	0.00	0.00	1.00
maker-tulip_contig_843_pilon_pilon-augustus-gene-9.53-mRNA-1	67.00	86.00	60.00	17.00	18.00	24.00	5.00	5.00	2.00	32.00	22.00	24.00	149.00	13.00	124.00	14.00	6.00	12.00
maker-tulip_contig_35_pilon_pilon-augustus-gene-0.97-mRNA-1	1.00	0.00	1.00	1.00	1.00	3.00	2.00	1.00	2.00	5.00	1.00	0.00	2.00	3.00	2.00	3.00	1.00	3.00
maker-tulip_contig_372_pilon_pilon-augustus-gene-1.76-mRNA-1	0.00	0.00	0.00	0.00	0.00	0.00	0.00	0.00	0.00	0.00	0.00	0.00	0.00	0.00	0.00	0.00	0.00	0.00
augustus_masked-tulip_contig_867_pilon_pilon-processed-gene-3.6-mRNA-1	7.86	13.60	4.00	4.02	1.16	0.00	0.00	1.50	0.00	0.00	1.00	0.00	5.20	2.00	0.00	0.00	0.00	0.00
augustus_masked-tulip_contig_806_pilon_pilon-processed-gene-1.4-mRNA-1	0.00	3.00	0.00	6.00	29.00	37.00	8.00	19.00	34.00	71.00	110.00	26.00	1365.00	197.00	551.00	1.00	0.00	0.00
augustus_masked-tulip_contig_2_pilon_pilon-processed-gene-5.4-mRNA-1	0.00	0.00	0.00	32.14	30.04	52.03	1905.26	566.17	832.39	29.07	73.08	91.47	0.00	0.00	0.00	0.00	0.00	0.00
maker-tulip_contig_281_pilon_pilon-augustus-gene-3.17-mRNA-1	195.00	248.00	169.00	407.00	426.00	367.00	185.00	156.00	106.00	435.00	358.00	393.00	1219.00	155.00	753.00	406.00	162.00	446.00
augustus_masked-tulip_contig_843_pilon_pilon-processed-gene-0.20-mRNA-1	1192.00	1284.00	1464.00	437.00	414.00	434.00	323.00	256.00	243.00	573.00	405.00	467.00	2192.00	306.00	1393.00	227.00	96.00	278.00
maker-tulip_contig_862_pilon_pilon-augustus-gene-1.45-mRNA-1	394.65	323.52	353.46	149.55	241.07	183.68	304.96	382.63	194.93	294.94	263.44	260.19	812.48	117.36	564.66	165.19	97.90	162.00
augustus_masked-tulip_contig_288_pilon_pilon-processed-gene-1.32-mRNA-1	0.00	4.00	0.00	0.00	0.00	0.00	0.00	0.00	1.00	1.00	0.00	0.00	4.00	0.00	3.00	0.00	0.00	0.00
maker-tulip_contig_837_pilon_pilon-augustus-gene-6.38-mRNA-1	137.00	77.00	149.00	257.00	189.00	185.00	150.00	99.00	88.00	301.00	279.00	309.00	534.00	50.00	347.00	211.00	78.00	248.00
maker-tulip_contig_623_pilon_pilon-augustus-gene-4.86-mRNA-1	3380.00	3079.00	3217.00	340.00	251.00	247.00	285.00	262.00	209.00	1373.00	1172.00	1014.00	1207.00	131.00	854.00	342.00	148.00	308.00
maker-tulip_contig_209_pilon_pilon-augustus-gene-2.17-mRNA-1	249.00	101.00	128.00	33.00	58.00	61.00	59.00	80.00	47.00	51.00	33.00	44.00	66.00	7.00	62.00	39.00	19.00	21.00
augustus_masked-tulip_contig_380_pilon_pilon-processed-gene-1.0-mRNA-1	0.00	0.00	0.00	6.00	4.00	6.00	2.00	2.00	1.00	0.00	0.00	0.00	0.00	0.00	0.00	0.00	0.00	1.00
augustus_masked-tulip_contig_446_pilon_pilon-processed-gene-0.21-mRNA-1	0.00	0.00	0.00	2.00	3.00	7.00	48.00	60.00	55.00	165.57	94.95	69.00	246.60	16.00	89.00	67.00	17.00	39.00
augustus_masked-tulip_contig_131_pilon_pilon-processed-gene-0.24-mRNA-1	29.00	46.00	21.00	100.00	117.00	86.00	40.00	40.00	23.00	86.00	54.00	82.00	66.00	18.00	55.00	40.00	18.00	48.00
maker-tulip_contig_161_pilon_pilon-augustus-gene-0.35-mRNA-1	21.00	25.00	22.00	2.00	3.00	1.00	5.00	9.00	6.00	151.00	106.00	111.00	111.00	15.00	86.00	11.00	5.00	11.00
augustus_masked-tulip_contig_777_pilon_pilon-processed-gene-1.16-mRNA-1	0.00	0.67	1.67	0.33	0.25	0.00	0.00	0.00	0.00	1.00	1.33	0.83	0.00	0.00	0.33	0.00	0.25	0.00
maker-tulip_contig_176_pilon_pilon-augustus-gene-0.69-mRNA-1	0.00	0.00	0.00	0.00	0.00	0.00	0.00	0.00	0.00	0.00	0.00	0.00	0.00	0.00	0.00	0.00	0.00	0.00
maker-tulip_contig_620_pilon_pilon-augustus-gene-0.59-mRNA-1	2.00	3.00	5.00	1488.00	1816.00	1531.00	235.00	198.00	143.00	67.00	50.00	69.00	96.00	16.00	73.00	201.00	68.00	146.00
maker-tulip_contig_54_pilon_pilon-augustus-gene-1.0-mRNA-1	602.00	485.00	528.00	240.00	218.00	225.00	167.06	149.00	123.03	186.05	196.00	187.00	766.00	112.00	586.00	145.00	57.00	191.00
maker-tulip_contig_669_pilon_pilon-augustus-gene-2.47-mRNA-1	10.00	15.00	8.00	147.00	125.00	162.00	120.00	76.00	79.00	101.00	74.00	115.00	217.00	40.00	120.00	59.00	43.00	142.00
maker-tulip_contig_1_pilon_pilon-augustus-gene-3.1-mRNA-1	1.00	1.00	0.00	0.00	0.00	0.00	0.00	0.00	0.00	0.00	0.00	0.00	1.00	0.00	2.00	34.00	17.00	32.00
maker-tulip_contig_320_pilon_pilon-augustus-gene-3.45-mRNA-1	0.00	0.00	0.00	0.00	0.00	0.00	0.00	0.00	0.00	0.00	0.00	1.00	0.00	0.00	0.00	1.00	0.00	0.00
maker-tulip_contig_799_pilon_pilon-augustus-gene-0.80-mRNA-1	0.00	2.00	0.00	3.00	3.00	1.00	0.00	0.00	0.00	0.00	1.00	1.00	66.00	6.00	32.00	8.00	9.00	5.00
maker-tulip_contig_284_pilon_pilon-augustus-gene-1.24-mRNA-1	5.60	13.16	19.05	14.71	23.78	22.24	13.60	12.99	10.72	26.20	20.40	11.33	27.90	3.00	24.20	35.77	15.11	37.12
maker-tulip_contig_474_pilon_pilon-augustus-gene-1.55-mRNA-1	0.00	0.00	0.00	0.00	0.00	1.00	0.00	0.00	1.00	6.00	1.00	10.00	342.00	42.00	348.00	0.00	0.00	7.00
maker-tulip_contig_707_pilon_pilon-augustus-gene-0.5-mRNA-1	263.00	394.00	255.00	3357.00	2405.00	3135.00	4802.00	3761.00	2706.00	2206.00	1404.00	1480.00	5436.00	724.00	3162.00	2523.00	912.00	2543.00
maker-tulip_contig_671_pilon_pilon-augustus-gene-0.64-mRNA-1	7.87	0.00	11.53	14.38	6.56	4.20	26.74	17.20	11.45	8.50	4.99	2.38	15.12	0.00	2.44	3.33	0.00	1.51
maker-tulip_contig_905_pilon_pilon-augustus-gene-0.59-mRNA-1	0.00	0.00	7.69	0.00	0.00	0.00	0.00	0.00	0.00	29.36	14.05	14.85	0.00	0.00	0.00	7.65	3.17	4.90
augustus_masked-tulip_contig_516_pilon_pilon-processed-gene-1.3-mRNA-1	40.00	45.00	40.00	28.00	30.00	51.00	32.00	45.00	26.00	27.00	18.00	23.00	59.00	11.00	37.00	42.00	15.00	34.00
maker-tulip_contig_645_pilon_pilon-augustus-gene-2.9-mRNA-1	1.00	5.00	3.00	434.00	458.00	355.00	57.00	30.00	45.00	3.00	5.00	14.00	41.00	2.00	23.00	38.00	6.00	42.00
augustus_masked-tulip_contig_787_pilon_pilon-processed-gene-0.8-mRNA-1	0.00	0.00	0.00	3.00	2.00	2.00	0.00	0.00	0.00	10.00	1.00	1.00	2.00	1.00	0.00	0.00	0.00	1.00
augustus_masked-tulip_contig_654_pilon_pilon-processed-gene-1.28-mRNA-1	0.00	0.00	0.00	0.00	0.00	1.00	2.00	0.00	0.00	0.00	1.00	1.00	4.00	0.00	2.00	1648.00	985.00	1917.00
augustus_masked-tulip_contig_570_pilon_pilon-processed-gene-0.54-mRNA-1	51.54	24.66	57.51	8.41	21.91	13.23	4.67	26.70	7.55	4.08	5.28	4.87	7.12	0.00	0.00	0.00	0.00	0.00
maker-tulip_contig_199_pilon_pilon-augustus-gene-6.14-mRNA-1	0.00	0.00	0.00	0.00	0.00	0.00	0.00	0.00	0.00	0.00	0.00	0.00	1.00	0.00	0.00	36.00	22.00	35.00
maker-tulip_contig_236_pilon_pilon-augustus-gene-3.8-mRNA-1	129.00	130.00	171.00	1658.00	1479.00	1722.00	1543.00	948.00	904.00	997.00	707.00	933.00	7027.00	674.00	2359.00	6462.00	1076.00	3346.00
maker-tulip_contig_278_pilon_pilon-augustus-gene-0.24-mRNA-1	0.00	0.00	0.00	40.00	348.00	170.00	39.00	75.00	71.00	37.00	44.00	4.00	2.00	0.00	3.00	4.00	0.00	3.00
augustus_masked-tulip_contig_380_pilon_pilon-processed-gene-2.22-mRNA-1	0.00	3.00	0.00	0.00	2.00	0.00	0.00	0.00	0.00	0.00	0.00	0.00	0.00	0.00	1.00	0.00	0.00	1.00
maker-tulip_contig_507_pilon_pilon-augustus-gene-2.36-mRNA-1	71.00	45.00	79.00	1693.00	1612.00	1599.00	1113.00	1054.00	712.00	188.00	117.00	189.00	3165.00	246.00	1387.00	2040.00	522.00	1694.00
augustus_masked-tulip_contig_323_pilon_pilon-processed-gene-2.45-mRNA-1	50.00	26.00	39.00	223.00	201.00	238.00	137.00	114.00	114.00	748.00	686.00	866.00	552.00	78.00	370.00	271.00	104.00	280.00
augustus_masked-tulip_contig_781_pilon_pilon-processed-gene-4.5-mRNA-1	87.00	67.00	67.00	48.00	48.00	37.00	42.00	76.00	39.00	185.00	153.00	152.00	331.00	68.00	125.00	74.00	20.00	85.00
maker-tulip_contig_662_pilon_pilon-augustus-gene-1.4-mRNA-1	2626.00	2591.00	2715.00	1061.03	1116.00	1043.83	583.00	525.43	469.81	1459.00	1305.00	1471.00	2448.77	320.52	1631.91	476.00	199.00	553.00
maker-tulip_contig_831_pilon_pilon-augustus-gene-4.44-mRNA-1	0.00	0.00	0.00	14.00	20.00	12.00	9.00	11.00	10.00	6.00	1.00	5.00	52.00	7.00	15.00	22.00	13.00	38.00
augustus_masked-tulip_contig_480_pilon_pilon-processed-gene-0.19-mRNA-1	0.00	0.00	0.00	0.00	0.00	0.00	0.00	0.00	0.00	0.00	0.00	0.00	1.00	0.00	2.00	0.00	0.00	0.00
augustus_masked-tulip_contig_693_pilon_pilon-processed-gene-0.1-mRNA-1	0.00	0.00	0.00	2.00	1.00	4.00	0.00	0.00	0.00	1.00	1.00	0.00	1.00	0.00	0.00	0.00	0.00	0.00
maker-tulip_contig_673_pilon_pilon-augustus-gene-0.92-mRNA-1	317.00	339.00	330.00	814.00	919.00	904.00	595.00	624.00	303.00	236.00	98.00	106.00	1064.00	135.00	521.00	1039.00	232.00	1029.00
maker-tulip_contig_58_pilon_pilon-augustus-gene-5.28-mRNA-1	5.44	0.00	1.35	0.00	0.00	0.00	0.00	0.00	0.00	3.12	3.08	0.00	3.02	0.00	0.00	0.00	0.00	0.00
augustus_masked-tulip_contig_402_pilon_pilon-processed-gene-0.13-mRNA-1	0.00	1.00	0.00	4.00	5.00	0.00	25.00	18.00	2.00	0.00	1.00	3.00	0.00	0.00	1.00	0.00	0.00	1.00
maker-tulip_contig_1_pilon_pilon-augustus-gene-3.24-mRNA-1	971.00	653.00	838.00	393.00	463.00	466.00	557.00	564.00	393.00	135.00	104.00	121.00	322.00	30.00	213.00	97.00	41.00	91.00
maker-tulip_contig_224_pilon_pilon-augustus-gene-2.22-mRNA-1	0.00	0.00	5.00	95.00	153.00	154.00	175.00	83.00	42.00	0.00	0.00	0.00	1.00	0.00	0.00	0.00	0.00	0.00
maker-tulip_contig_468_pilon_pilon-augustus-gene-3.33-mRNA-1	1.00	0.00	0.00	9.77	24.47	14.25	7.18	33.82	10.59	14.39	9.95	13.69	79.96	15.72	46.32	21.09	4.84	20.02
augustus_masked-tulip_contig_357_pilon_pilon-processed-gene-0.2-mRNA-1	0.00	8.61	2.86	7.69	9.46	8.83	0.00	1.97	2.63	1.53	0.00	0.79	0.00	0.00	1.64	0.00	1.36	6.28
maker-tulip_contig_478_pilon_pilon-augustus-gene-0.8-mRNA-1	0.00	0.00	1.00	0.00	0.00	0.00	2.00	0.00	0.00	0.00	0.00	1.00	2.00	0.00	0.00	0.00	0.00	0.00
augustus_masked-tulip_contig_412_pilon_pilon-processed-gene-0.70-mRNA-1	0.00	0.00	0.00	0.00	0.00	0.00	0.00	0.00	0.00	0.00	0.00	0.00	0.00	0.00	0.00	0.00	0.00	0.00
augustus_masked-tulip_contig_474_pilon_pilon-processed-gene-4.20-mRNA-1	0.00	0.00	0.00	1.00	0.00	0.00	10.02	6.00	3.00	8.58	10.00	5.43	0.00	0.00	1.51	1.00	0.00	0.00
maker-tulip_contig_934_pilon_pilon-augustus-gene-0.14-mRNA-1	0.00	0.00	0.00	40.00	30.00	32.00	25.00	47.00	27.00	9.00	2.00	5.00	93.00	9.00	31.00	38.00	15.00	78.00
augustus_masked-tulip_contig_224_pilon_pilon-processed-gene-1.4-mRNA-1	0.00	1.00	1.00	16.00	27.00	4.00	2.00	0.00	1.00	0.00	0.00	0.00	1.00	0.00	2.00	1.00	0.00	2.00
maker-tulip_contig_389_pilon_pilon-augustus-gene-0.0-mRNA-1	355.51	121.48	92.41	2.00	0.00	0.00	0.00	0.00	0.00	0.00	0.00	0.00	1.00	0.00	2.50	0.00	0.00	0.00
augustus_masked-tulip_contig_384_pilon_pilon-processed-gene-0.123-mRNA-1	0.00	0.00	0.00	0.00	0.00	0.00	0.00	0.00	0.00	0.00	0.00	1.00	1.00	0.00	0.00	0.00	0.00	0.00
maker-tulip_contig_560_pilon_pilon-augustus-gene-0.37-mRNA-1	474.00	381.00	397.00	261.00	316.00	273.00	166.00	167.00	112.00	150.00	166.00	170.00	404.00	54.00	283.00	131.00	56.00	145.00
maker-tulip_contig_405_pilon_pilon-augustus-gene-0.32-mRNA-1	383.00	154.00	402.00	1481.00	1479.00	1430.00	523.00	341.00	322.00	3601.00	3403.00	3882.00	9499.00	953.00	5135.00	8688.00	2501.00	9046.00
augustus_masked-tulip_contig_3_pilon_pilon-processed-gene-0.44-mRNA-1	0.00	2.00	1.00	12.00	21.00	15.00	4.00	2.00	1.00	3.00	1.00	1.00	13.00	5.00	9.00	4.00	1.00	6.00
maker-tulip_contig_341_pilon_pilon-augustus-gene-0.5-mRNA-1	2.00	0.00	0.00	12.00	6.00	10.00	7.00	2.00	0.00	0.00	0.00	1.00	1.00	1.00	3.00	3.00	0.00	7.00
augustus_masked-tulip_contig_145_pilon_pilon-processed-gene-2.13-mRNA-1	0.00	0.00	0.00	16.00	21.00	18.00	49.00	38.00	36.00	0.00	0.00	0.00	4.00	1.00	0.00	2.00	0.00	4.00
maker-tulip_contig_479_pilon_pilon-augustus-gene-3.34-mRNA-1	0.00	0.00	0.00	256.00	51.00	201.00	775.00	273.00	394.00	198.00	153.00	252.00	4.00	1.00	2.00	3.00	1.00	8.00
maker-tulip_contig_560_pilon_pilon-augustus-gene-3.32-mRNA-1	596.00	459.00	415.00	314.00	318.00	299.00	473.00	460.00	327.00	186.00	195.00	177.00	1002.00	111.00	502.00	276.00	122.00	277.00
maker-tulip_contig_145_pilon_pilon-augustus-gene-2.60-mRNA-1	0.00	0.00	0.00	5.00	4.00	8.00	49.00	14.00	20.00	1.00	0.00	0.00	5.00	0.00	1.00	4.00	6.00	36.00
maker-tulip_contig_22_pilon_pilon-augustus-gene-0.7-mRNA-1	10.00	21.00	13.00	346.00	308.00	299.00	453.00	559.00	277.00	74.00	50.00	60.00	310.00	58.00	221.00	145.00	70.00	232.00
maker-tulip_contig_490_pilon_pilon-augustus-gene-2.45-mRNA-1	469.00	279.00	327.00	170.00	186.00	215.00	294.00	249.00	159.00	103.00	64.00	80.00	208.00	22.00	107.00	99.00	61.00	85.00
augustus_masked-tulip_contig_753_pilon_pilon-processed-gene-1.30-mRNA-1	390.79	603.08	259.09	0.00	0.00	0.00	0.00	0.00	0.00	0.00	0.00	0.00	2965.60	335.96	2119.19	0.00	0.00	0.00
augustus_masked-tulip_contig_147_pilon_pilon-processed-gene-0.13-mRNA-1	0.00	0.00	0.00	1.00	0.00	0.00	1.00	1.00	2.00	1.00	0.00	0.00	1.00	0.00	0.00	4.00	1.00	11.00
maker-tulip_contig_254_pilon_pilon-augustus-gene-0.26-mRNA-1	1.00	0.00	2.00	0.00	0.00	1.00	0.00	0.00	0.00	0.00	0.00	0.00	1.00	0.00	0.00	0.00	0.00	0.00
augustus_masked-tulip_contig_484_pilon_pilon-processed-gene-0.25-mRNA-1	1.70	7.75	4.15	7.70	3.29	2.69	6.77	0.00	1.33	10.75	6.73	2.78	7.18	2.64	7.22	4.91	3.25	1.20
augustus_masked-tulip_contig_85_pilon_pilon-processed-gene-2.43-mRNA-1	1.00	0.00	2.00	3.00	5.00	2.00	9.00	13.00	2.00	28.00	15.00	19.00	21.00	2.00	10.00	10.00	3.00	10.00
maker-tulip_contig_843_pilon_pilon-augustus-gene-8.19-mRNA-1	22.00	2.00	13.00	644.00	408.00	553.00	1461.00	749.00	828.00	822.00	469.00	728.00	741.00	100.00	635.00	1022.00	279.00	817.00
augustus_masked-tulip_contig_716_pilon_pilon-processed-gene-1.20-mRNA-1	832.00	652.00	757.00	96.00	76.00	78.00	150.00	117.00	80.00	364.00	365.00	409.00	1004.00	126.00	768.00	81.00	31.00	64.00
maker-tulip_contig_715_pilon_pilon-augustus-gene-5.80-mRNA-1	0.00	0.00	0.00	0.00	0.00	2.00	1.00	0.00	0.00	0.00	0.00	0.00	13.00	2.00	2.00	2.00	0.00	0.00
maker-tulip_contig_44_pilon_pilon-augustus-gene-0.23-mRNA-1	0.00	3.00	3.00	1.00	0.00	2.00	7.00	11.00	1.00	31.00	23.00	3.00	12.00	0.00	1.00	16.00	7.00	8.00
augustus_masked-tulip_contig_620_pilon_pilon-processed-gene-0.31-mRNA-1	0.00	0.00	0.00	0.00	0.00	0.00	0.00	0.00	0.00	0.00	0.00	0.00	2.53	0.00	0.00	0.00	0.00	0.00
augustus_masked-tulip_contig_529_pilon_pilon-processed-gene-1.66-mRNA-1	0.00	0.00	1.00	1.05	0.00	1.00	1.08	0.00	0.00	1.04	2.23	3.27	2.10	0.00	1.05	0.00	1.00	0.00
augustus_masked-tulip_contig_586_pilon_pilon-processed-gene-5.3-mRNA-1	8.36	0.00	14.96	9.66	10.05	8.11	0.00	0.00	4.00	0.00	0.00	2.00	0.00	0.00	0.00	0.00	0.00	1.01
augustus_masked-tulip_contig_306_pilon_pilon-processed-gene-0.11-mRNA-1	85.00	70.00	41.00	254.00	193.00	223.00	187.00	125.00	86.00	373.00	350.00	361.00	1029.00	130.00	630.00	405.00	144.00	485.00
maker-tulip_contig_15_pilon_pilon-augustus-gene-3.202-mRNA-1	0.00	0.00	0.00	0.00	2.00	2.00	2.00	1.00	3.00	1.00	1.00	1.00	2.00	0.00	1.00	21.00	8.00	16.00
augustus_masked-tulip_contig_407_pilon_pilon-processed-gene-2.59-mRNA-1	0.58	4.93	7.42	0.62	11.94	0.02	0.01	0.00	3.84	0.00	9.02	4.80	1.15	0.15	0.13	0.00	0.00	0.61
augustus_masked-tulip_contig_29_pilon_pilon-processed-gene-0.6-mRNA-1	4.00	0.00	1.00	4.10	0.00	1.00	0.00	0.00	1.00	2.00	0.00	2.00	3.87	0.00	2.00	2.00	0.00	3.00
maker-tulip_contig_837_pilon_pilon-augustus-gene-5.2-mRNA-1	216.00	287.00	242.00	538.00	602.00	535.00	735.00	649.00	471.00	633.00	447.00	459.00	2301.00	253.00	1204.00	603.00	219.00	756.00
augustus_masked-tulip_contig_362_pilon_pilon-processed-gene-3.5-mRNA-1	11.00	16.00	10.00	62.00	94.00	98.00	74.00	48.00	33.00	83.00	85.00	101.00	181.00	25.00	83.00	57.00	25.00	48.00
augustus_masked-tulip_contig_514_pilon_pilon-processed-gene-1.46-mRNA-1	0.00	0.00	0.00	52.00	52.00	24.00	6.00	3.00	3.00	4.00	1.00	1.00	2.00	0.00	0.00	2.00	0.00	2.00
maker-tulip_contig_667_pilon_pilon-augustus-gene-0.75-mRNA-1	98.00	64.00	62.00	212.00	221.00	193.00	208.00	190.00	134.00	1071.00	934.00	1047.00	797.00	94.00	461.00	374.00	149.00	385.00
augustus_masked-tulip_contig_4_pilon_pilon-processed-gene-1.54-mRNA-1	0.00	0.00	0.00	0.00	0.00	0.00	0.00	0.00	0.00	0.00	0.00	0.00	0.00	0.00	0.00	1.00	0.00	2.00
augustus_masked-tulip_contig_126_pilon_pilon-processed-gene-0.59-mRNA-1	31.00	43.89	25.00	9.00	15.94	11.00	7.77	7.00	6.00	14.82	14.87	6.74	0.00	0.00	0.00	2.00	0.00	1.00
maker-tulip_contig_199_pilon_pilon-augustus-gene-3.73-mRNA-1	603.00	514.14	627.00	334.00	421.00	386.00	389.00	397.00	289.00	223.00	213.00	185.00	1215.97	155.00	802.00	217.00	91.00	200.00
augustus_masked-tulip_contig_781_pilon_pilon-processed-gene-6.14-mRNA-1	121.00	63.00	73.00	253.00	183.00	225.00	208.00	149.00	134.00	366.00	240.00	320.00	568.00	80.00	288.00	203.00	69.00	217.00
maker-tulip_contig_531_pilon_pilon-augustus-gene-0.48-mRNA-1	14.00	2.00	11.00	109.00	98.00	109.00	51.00	26.00	22.00	19.00	17.00	25.00	146.00	19.00	76.00	93.00	34.00	32.00
augustus_masked-tulip_contig_199_pilon_pilon-processed-gene-4.13-mRNA-1	1260.00	1172.00	1400.00	259.00	214.00	243.00	301.00	249.00	202.00	329.00	280.00	319.00	1056.00	136.00	749.00	159.00	72.00	135.00
maker-tulip_contig_759_pilon_pilon-augustus-gene-1.55-mRNA-1	223.00	186.00	227.00	81.00	66.00	62.00	77.00	59.00	58.00	119.00	103.00	117.00	448.00	48.00	310.00	96.00	18.00	58.00
maker-tulip_contig_474_pilon_pilon-augustus-gene-0.34-mRNA-1	10.00	17.00	15.00	1.00	2.00	0.00	0.00	1.00	1.00	2.00	2.00	6.00	2.00	1.00	425.00	1.00	1.00	0.00
maker-tulip_contig_164_pilon_pilon-augustus-gene-0.0-mRNA-1	0.00	0.00	1.00	0.00	0.00	0.00	1.00	0.00	0.00	0.00	0.00	0.00	3.00	0.00	0.00	0.00	0.00	0.00
augustus_masked-tulip_contig_145_pilon_pilon-processed-gene-2.28-mRNA-1	3.00	0.00	1.00	1.00	0.00	0.00	2.00	0.00	1.00	1.00	2.00	0.00	0.00	0.00	0.00	0.00	0.00	2.00
augustus_masked-tulip_contig_707_pilon_pilon-processed-gene-0.82-mRNA-1	11.00	3.00	7.00	100.00	83.00	80.00	22.00	13.00	21.00	32.00	31.00	48.00	89.00	7.00	50.00	23.00	11.00	33.00
augustus_masked-tulip_contig_610_pilon_pilon-processed-gene-3.18-mRNA-1	63.44	34.63	38.52	22.71	32.29	21.01	28.22	34.31	22.29	22.28	11.46	32.63	56.85	1.00	29.79	1.04	0.51	0.00
augustus_masked-tulip_contig_125_pilon_pilon-processed-gene-0.433-mRNA-1	0.00	0.00	0.00	0.00	1.00	2.00	3.00	1.00	1.00	0.00	0.00	0.00	0.00	0.00	0.00	0.00	0.00	0.00
maker-tulip_contig_773_pilon_pilon-augustus-gene-2.54-mRNA-1	0.00	1.00	0.00	855.00	532.00	960.00	365.00	983.00	219.00	33.00	40.00	22.00	812.00	92.00	442.00	1138.00	177.00	549.00
maker-tulip_contig_287_pilon_pilon-augustus-gene-1.48-mRNA-1	0.00	0.00	0.00	0.00	0.00	0.00	0.00	0.00	0.00	0.00	0.00	0.00	0.00	0.00	0.00	0.00	0.00	0.00
augustus_masked-tulip_contig_196_pilon_pilon-processed-gene-3.6-mRNA-1	2.00	0.00	0.00	154.00	131.00	125.00	49.00	31.00	19.00	24.00	28.00	23.00	19.00	3.00	14.00	21.00	8.00	27.00
maker-tulip_contig_689_pilon_pilon-augustus-gene-4.30-mRNA-1	1250.00	1014.00	1114.00	3528.00	3025.00	3660.00	2831.00	2211.00	1681.00	921.00	769.00	901.00	7279.00	720.00	3607.00	6090.00	1407.00	5819.00
maker-tulip_contig_704_pilon_pilon-augustus-gene-2.66-mRNA-1	135.00	80.00	74.00	376.00	440.00	395.00	225.00	502.00	158.00	196.00	116.00	150.00	663.00	76.00	477.00	387.00	165.00	405.00
maker-tulip_contig_292_pilon_pilon-augustus-gene-0.43-mRNA-1	0.00	0.00	0.00	0.00	0.00	0.00	0.00	0.00	0.00	0.00	0.00	0.00	0.00	0.00	0.00	35.00	24.00	33.00
maker-tulip_contig_547_pilon_pilon-augustus-gene-1.28-mRNA-1	1.00	3.00	2.00	30.00	38.00	18.00	24.00	20.00	34.00	10.00	20.00	12.00	31.00	3.00	20.00	64.00	72.00	98.00
augustus_masked-tulip_contig_603_pilon_pilon-processed-gene-1.40-mRNA-1	0.00	0.00	0.00	0.00	0.00	0.00	0.00	0.00	0.00	0.00	0.00	0.00	0.00	0.00	0.00	0.00	1.00	0.00
maker-tulip_contig_628_pilon_pilon-augustus-gene-2.6-mRNA-1	407.00	262.00	365.00	338.00	326.00	339.00	142.00	90.00	95.00	388.00	244.00	357.00	106.00	14.00	51.00	54.00	9.00	52.00
augustus_masked-tulip_contig_525_pilon_pilon-processed-gene-1.3-mRNA-1	0.00	0.00	0.00	0.00	0.00	0.00	0.00	0.00	0.00	0.00	0.00	0.00	0.00	0.00	0.00	0.00	0.00	0.00
maker-tulip_contig_272_pilon_pilon-augustus-gene-4.56-mRNA-1	0.00	0.00	0.00	8.00	8.00	4.00	7.00	5.00	1.00	6.00	1.00	2.00	31.00	3.00	8.00	248.00	190.00	346.00
maker-tulip_contig_651_pilon_pilon-augustus-gene-0.23-mRNA-1	0.00	0.00	0.00	0.00	0.00	0.00	1.00	0.00	0.00	0.00	0.00	1.00	1.00	0.00	1.00	0.00	0.00	0.00
maker-tulip_contig_547_pilon_pilon-augustus-gene-0.9-mRNA-1	0.00	0.00	0.00	0.00	0.00	0.00	0.00	0.00	0.00	0.00	0.00	0.00	0.00	0.00	0.00	11.00	3.00	10.00
maker-tulip_contig_69_pilon_pilon-augustus-gene-2.30-mRNA-1	24.00	3.00	8.00	93.00	66.00	76.00	228.00	144.00	161.00	132.00	179.00	210.00	81.00	6.00	29.00	73.00	2.00	27.00
augustus_masked-tulip_contig_125_pilon_pilon-processed-gene-0.397-mRNA-1	0.00	0.00	0.00	0.00	0.00	0.00	0.00	0.00	0.00	0.00	0.00	0.00	0.00	0.00	0.00	205.89	30.58	241.66
maker-tulip_contig_515_pilon_pilon-augustus-gene-5.0-mRNA-1	0.00	0.00	0.00	0.00	0.00	0.00	0.00	0.00	0.00	0.00	0.00	0.00	1.49	0.00	0.00	0.00	0.00	0.00
augustus_masked-tulip_contig_765_pilon_pilon-processed-gene-0.2-mRNA-1	0.00	0.00	0.00	0.00	0.00	0.00	0.00	0.00	0.00	0.42	0.00	0.00	0.39	0.00	0.00	0.00	0.00	0.45
maker-tulip_contig_653_pilon_pilon-augustus-gene-0.10-mRNA-1	0.00	0.00	0.00	16.00	40.00	38.00	851.00	771.00	308.00	0.00	0.00	0.00	0.00	0.00	0.00	0.00	0.00	0.00
maker-tulip_contig_774_pilon_pilon-augustus-gene-0.90-mRNA-1	0.00	0.00	0.00	0.00	0.00	0.00	2.00	0.00	0.00	0.00	0.00	0.00	5.00	1.00	2.00	3.00	0.00	1.00
augustus_masked-tulip_contig_233_pilon_pilon-processed-gene-0.2-mRNA-1	0.00	0.00	0.00	0.00	1.00	0.00	0.00	0.00	0.00	0.00	0.00	0.00	0.00	0.00	0.00	0.00	0.00	0.00
augustus_masked-tulip_contig_44_pilon_pilon-processed-gene-4.2-mRNA-1	0.00	0.00	0.00	0.00	0.00	0.00	0.00	0.00	0.00	0.00	0.00	0.00	0.00	0.00	0.00	1.00	0.00	0.00
maker-tulip_contig_799_pilon_pilon-augustus-gene-0.74-mRNA-1	0.00	0.00	0.00	1.00	1.00	0.00	1.00	0.00	0.00	0.00	0.00	0.00	2.00	0.00	1.00	1.00	1.00	2.00
maker-tulip_contig_323_pilon_pilon-augustus-gene-8.54-mRNA-1	0.00	0.00	3.00	0.00	0.00	1.00	2.00	1.00	0.00	16.00	10.00	7.00	5.00	0.00	5.00	27.00	23.00	20.00
augustus_masked-tulip_contig_648_pilon_pilon-processed-gene-2.50-mRNA-1	0.00	7.00	0.00	0.00	1.00	1.00	1.00	0.00	4.00	16.00	17.00	25.00	132.00	20.00	105.66	0.00	2.00	10.00
augustus_masked-tulip_contig_586_pilon_pilon-processed-gene-3.29-mRNA-1	0.00	0.00	0.00	0.00	1.00	1.00	0.00	0.00	0.00	1.00	0.00	0.00	0.00	0.00	0.00	0.00	0.00	0.00
maker-tulip_contig_44_pilon_pilon-augustus-gene-1.16-mRNA-1	0.00	0.00	0.00	0.00	0.00	0.00	0.00	0.00	0.00	0.00	0.00	0.00	0.00	0.00	0.00	0.00	0.00	0.00
augustus_masked-tulip_contig_112_pilon_pilon-processed-gene-3.34-mRNA-1	0.00	0.00	0.00	0.00	0.00	0.00	0.00	0.00	0.00	0.00	0.00	0.00	0.00	0.00	0.00	0.00	0.00	0.00
maker-tulip_contig_745_pilon_pilon-augustus-gene-1.17-mRNA-1	28.00	13.00	33.00	45.00	45.00	36.00	49.00	28.00	33.00	59.00	58.00	64.00	103.00	10.00	56.00	31.00	8.00	36.00
augustus_masked-tulip_contig_360_pilon_pilon-processed-gene-1.8-mRNA-1	17.00	9.00	18.00	18.00	23.00	14.00	28.00	51.00	24.00	552.00	498.00	455.00	157.00	21.00	145.00	204.00	59.00	128.00
augustus_masked-tulip_contig_121_pilon_pilon-processed-gene-1.26-mRNA-1	0.00	0.00	0.00	0.00	0.00	0.00	0.00	0.00	0.00	0.00	0.00	0.00	0.00	0.00	0.00	0.00	0.00	0.00
maker-tulip_contig_339_pilon_pilon-augustus-gene-0.84-mRNA-1	0.00	2.00	0.00	0.00	0.00	1.00	0.00	0.00	0.00	7.00	2.00	8.00	0.00	0.00	0.00	0.00	1.00	0.00
maker-tulip_contig_689_pilon_pilon-augustus-gene-4.19-mRNA-1	151.00	148.00	191.00	281.00	267.00	248.00	225.00	165.00	114.00	282.00	271.00	235.00	770.00	103.00	518.00	476.00	134.00	362.00
maker-tulip_contig_827_pilon_pilon-augustus-gene-2.53-mRNA-1	281.00	224.00	253.00	103.00	98.00	114.00	90.00	59.00	59.00	197.00	146.00	155.00	436.00	61.00	341.00	143.00	34.00	98.00
maker-tulip_contig_859_pilon_pilon-augustus-gene-0.8-mRNA-1	0.00	0.00	0.00	0.00	0.00	0.00	0.00	0.00	0.00	0.00	0.00	0.00	0.00	0.00	0.00	0.00	0.00	0.00
maker-tulip_contig_211_pilon_pilon-augustus-gene-2.74-mRNA-1	40.00	41.00	8.00	34.00	27.00	71.00	82.00	69.00	46.00	229.00	226.00	172.00	477.00	56.00	393.00	119.00	65.00	136.00
maker-tulip_contig_396_pilon_pilon-augustus-gene-0.0-mRNA-1	10.00	5.00	4.00	67.00	83.00	67.00	72.00	69.00	50.00	1244.00	562.00	1064.00	64.00	10.00	48.00	32.00	14.00	25.00
maker-tulip_contig_76_pilon_pilon-augustus-gene-1.21-mRNA-1	0.00	1.00	0.00	1.00	0.00	1.00	0.00	1.00	0.00	1.00	0.00	4.00	5.00	2.00	1.00	2.00	1.00	2.00
augustus_masked-tulip_contig_259_pilon_pilon-processed-gene-0.1-mRNA-1	0.00	0.00	0.00	6.00	4.00	3.00	3.00	1.00	2.00	2.00	0.00	0.00	1.00	0.00	1.00	0.00	0.00	1.00
augustus_masked-tulip_contig_2_pilon_pilon-processed-gene-5.2-mRNA-1	4.00	1.00	5.00	402.00	257.00	613.00	5273.00	1703.00	1290.00	5704.00	5873.00	7428.00	1062.00	79.00	82.00	122.00	39.00	219.00
augustus_masked-tulip_contig_478_pilon_pilon-processed-gene-0.11-mRNA-1	3.00	0.00	0.00	1.00	0.00	1.00	0.00	0.00	0.00	1.00	0.00	4.00	2.00	0.00	0.00	1.00	0.00	0.00
maker-tulip_contig_177_pilon_pilon-augustus-gene-0.11-mRNA-1	7.00	3.00	7.00	124.00	262.00	291.00	164.00	139.00	133.00	41.00	31.00	44.00	175.00	36.00	169.00	102.00	34.00	113.00
augustus_masked-tulip_contig_327_pilon_pilon-processed-gene-5.22-mRNA-1	66.00	15.00	39.00	228.00	97.00	145.00	175.00	84.00	128.00	195.00	126.00	164.00	192.00	13.00	60.00	68.00	22.00	40.00
maker-tulip_contig_559_pilon_pilon-augustus-gene-2.0-mRNA-1	3.00	14.00	2.00	96.00	93.00	78.00	13.00	9.00	6.00	6.00	4.00	6.00	71.00	8.00	31.00	7.00	5.00	10.00
augustus_masked-tulip_contig_88_pilon_pilon-processed-gene-0.8-mRNA-1	0.00	9.00	0.00	4.00	5.00	7.00	5.00	13.00	4.00	4.00	11.00	16.00	19.00	2.00	23.00	11.00	9.00	16.00
maker-tulip_contig_25_pilon_pilon-augustus-gene-0.3-mRNA-1	41.64	3.28	12.60	9.95	6.72	18.76	6.45	26.22	9.76	21.80	10.04	5.67	24.10	1.00	25.80	6.65	6.89	11.88
maker-tulip_contig_187_pilon_pilon-augustus-gene-1.92-mRNA-1	4.00	2.00	3.00	1.00	5.00	4.00	1.00	4.00	1.00	8.00	4.00	4.00	6.00	0.00	4.00	25.00	15.00	21.00
augustus_masked-tulip_contig_190_pilon_pilon-processed-gene-3.41-mRNA-1	1.00	3.00	1.00	4.00	3.00	3.00	3.00	1.00	1.00	44.00	18.00	35.00	77.00	11.00	51.00	28.00	17.00	40.00
augustus_masked-tulip_contig_37_pilon_pilon-processed-gene-3.1-mRNA-1	0.00	1.00	0.00	1.00	0.00	2.00	0.00	0.00	0.00	0.00	0.00	0.00	0.00	0.00	0.00	0.00	0.00	0.00
maker-tulip_contig_646_pilon_pilon-augustus-gene-0.2-mRNA-1	0.00	0.00	2.00	1.00	1.00	1.00	0.00	0.00	0.00	4.00	0.00	3.00	1.00	1.00	0.00	0.00	0.00	0.00
augustus_masked-tulip_contig_916_pilon_pilon-processed-gene-3.5-mRNA-1	0.00	0.00	0.00	121.00	142.00	143.00	222.00	163.00	144.00	27.00	10.00	15.00	378.00	21.00	112.00	381.00	54.00	223.00
augustus_masked-tulip_contig_881_pilon_pilon-processed-gene-1.51-mRNA-1	0.00	0.00	0.00	1.00	0.00	1.00	2.00	0.00	0.00	0.00	0.00	0.00	101.00	13.00	62.00	110.00	39.00	160.00
maker-tulip_contig_819_pilon_pilon-augustus-gene-0.37-mRNA-1	52.00	38.00	37.00	210.00	233.00	164.00	65.00	52.00	65.00	254.00	236.00	300.00	750.00	110.00	440.00	187.00	56.00	215.00
augustus_masked-tulip_contig_187_pilon_pilon-processed-gene-1.16-mRNA-1	0.00	1.00	0.00	0.00	3.00	0.00	0.00	0.00	0.00	3.00	0.00	1.00	0.00	1.00	1.00	92.00	65.00	103.00
maker-tulip_contig_491_pilon_pilon-augustus-gene-1.33-mRNA-1	8.00	3.00	6.00	17.00	14.00	6.00	6.00	8.00	7.00	17.00	4.00	6.00	12.00	2.00	6.00	4.00	1.00	5.00
maker-tulip_contig_156_pilon_pilon-augustus-gene-0.22-mRNA-1	1748.00	1525.00	1796.00	729.95	726.88	776.16	508.64	573.00	373.26	802.31	767.94	766.81	1280.30	212.48	897.45	314.84	149.93	316.33
augustus_masked-tulip_contig_861_pilon_pilon-processed-gene-0.7-mRNA-1	0.00	1.00	0.00	0.00	0.00	0.00	0.00	0.00	0.00	0.00	0.00	0.00	0.00	0.00	0.00	0.00	0.00	0.00
augustus_masked-tulip_contig_881_pilon_pilon-processed-gene-0.9-mRNA-1	6.00	0.00	1.00	5.00	7.00	10.00	6.00	0.00	4.00	7.00	8.00	11.00	13.00	4.00	11.00	4.00	1.00	4.00
augustus_masked-tulip_contig_656_pilon_pilon-processed-gene-0.13-mRNA-1	0.00	1.59	0.00	0.00	0.00	2.00	0.00	1.00	1.00	0.00	0.00	3.00	1.00	0.00	1.00	0.00	1.00	1.40
maker-tulip_contig_593_pilon_pilon-augustus-gene-1.26-mRNA-1	797.00	950.00	1006.00	112.00	155.00	124.00	168.00	195.00	165.00	121.00	107.00	131.00	419.00	50.00	287.00	272.00	64.00	201.00
maker-tulip_contig_236_pilon_pilon-augustus-gene-7.81-mRNA-1	97.00	186.00	142.00	1181.00	1112.00	1211.00	1659.00	1124.00	863.00	236.00	151.00	272.00	2541.00	247.00	1787.00	2785.00	631.00	2448.00
augustus_masked-tulip_contig_671_pilon_pilon-processed-gene-0.4-mRNA-1	0.00	0.00	0.00	0.00	0.00	0.00	0.00	0.00	0.00	0.00	0.00	0.00	0.00	0.00	0.00	0.00	0.00	0.00
maker-tulip_contig_66_pilon_pilon-augustus-gene-2.2-mRNA-1	0.00	1.00	0.00	50.00	35.00	25.00	117.00	122.00	97.00	85.00	133.00	130.00	52.00	11.00	32.00	7.00	0.00	16.00
augustus_masked-tulip_contig_181_pilon_pilon-processed-gene-1.52-mRNA-1	0.00	0.00	0.00	0.00	0.00	0.00	0.00	0.00	0.00	0.00	0.00	0.00	0.00	0.00	2.00	1.00	1.00	6.00
maker-tulip_contig_677_pilon_pilon-augustus-gene-1.37-mRNA-1	8.00	4.00	4.00	25.00	17.00	19.00	21.00	8.00	9.00	41.00	22.00	35.00	73.00	9.00	26.00	11.00	6.00	31.00
maker-tulip_contig_339_pilon_pilon-augustus-gene-3.29-mRNA-1	289.00	514.00	367.00	168.00	202.00	190.00	202.00	259.00	136.00	72.00	43.00	39.00	677.00	73.00	446.00	71.00	31.00	56.00
maker-tulip_contig_103_pilon_pilon-augustus-gene-0.11-mRNA-1	21.00	76.00	32.00	4.00	6.00	3.00	2.00	6.00	3.00	12.00	12.00	13.00	6.00	0.00	5.00	11.00	7.00	3.00
augustus_masked-tulip_contig_59_pilon_pilon-processed-gene-0.4-mRNA-1	49.00	59.00	57.00	33.00	36.00	30.00	58.00	50.00	29.00	113.00	55.00	59.00	76.00	7.00	53.00	48.00	18.00	47.00
augustus_masked-tulip_contig_281_pilon_pilon-processed-gene-1.68-mRNA-1	1556.00	1516.00	1527.00	262.00	271.00	302.00	234.00	233.00	129.00	443.00	365.00	399.00	1124.00	165.00	832.00	152.00	59.00	160.00
maker-tulip_contig_895_pilon_pilon-augustus-gene-2.24-mRNA-1	82.00	67.00	124.00	2.00	1.00	6.00	3.00	4.00	4.00	91.00	51.00	88.00	34.00	2.00	20.00	22.00	3.00	9.00
maker-tulip_contig_199_pilon_pilon-augustus-gene-3.46-mRNA-1	0.00	0.00	0.00	0.00	0.00	0.00	0.00	0.00	0.00	0.00	0.00	0.00	0.00	0.00	0.00	0.00	0.00	0.00
maker-tulip_contig_276_pilon_pilon-augustus-gene-2.13-mRNA-1	135.00	86.00	122.00	250.00	287.00	255.00	273.00	225.00	146.00	191.00	122.00	164.00	446.00	81.00	291.00	109.00	44.00	111.00
maker-tulip_contig_339_pilon_pilon-augustus-gene-1.6-mRNA-1	0.00	0.00	0.00	153.00	202.00	216.00	176.01	240.00	83.00	0.00	0.00	0.00	1.00	0.00	0.00	0.00	0.00	0.00
maker-tulip_contig_66_pilon_pilon-augustus-gene-1.23-mRNA-1	0.00	3.00	0.00	0.00	1.00	0.00	0.00	0.00	0.00	1.00	1.00	0.00	11.00	0.00	2.00	5.00	3.00	1.00
maker-tulip_contig_276_pilon_pilon-augustus-gene-3.65-mRNA-1	48.00	29.00	38.00	4651.00	4199.00	4963.00	4193.00	3651.00	2639.00	277.00	218.00	277.00	1367.00	134.00	531.00	1403.00	457.00	1093.00
augustus_masked-tulip_contig_855_pilon_pilon-processed-gene-0.0-mRNA-1	0.00	0.00	0.00	15.00	23.00	13.00	8.00	3.00	2.00	7.00	13.00	10.00	0.00	0.00	0.00	0.00	0.00	0.00
maker-tulip_contig_597_pilon_pilon-augustus-gene-5.26-mRNA-1	1013.00	591.00	607.00	397.00	413.00	386.00	461.00	442.00	364.00	646.00	509.00	558.00	1763.00	218.00	1016.00	399.00	176.00	340.00
augustus_masked-tulip_contig_770_pilon_pilon-processed-gene-0.43-mRNA-1	0.00	0.00	0.00	1.00	1.00	1.00	0.00	0.00	0.00	0.00	0.00	0.00	1.00	0.00	0.00	0.00	0.00	4.00
maker-tulip_contig_620_pilon_pilon-augustus-gene-0.99-mRNA-1	43.00	47.00	32.00	81.00	89.00	64.00	63.00	59.00	29.00	111.00	110.00	103.00	342.00	65.00	234.00	98.00	43.00	109.00
augustus_masked-tulip_contig_228_pilon_pilon-processed-gene-1.17-mRNA-1	0.00	0.00	0.00	9.00	8.00	10.00	2.00	0.00	1.00	0.00	0.00	0.00	0.00	1.00	1.00	4.00	2.00	3.00
augustus_masked-tulip_contig_870_pilon_pilon-processed-gene-2.22-mRNA-1	58.00	156.00	45.00	0.00	0.00	0.00	0.00	0.00	0.00	0.00	1.00	0.00	478.00	67.00	404.00	0.00	0.00	0.00
maker-tulip_contig_375_pilon_pilon-augustus-gene-0.5-mRNA-1	538.00	364.00	468.00	267.00	342.00	243.00	363.00	267.00	219.00	329.00	258.00	274.00	637.00	71.00	492.00	216.00	90.00	289.00
augustus_masked-tulip_contig_323_pilon_pilon-processed-gene-6.57-mRNA-1	0.00	0.00	0.00	0.00	0.00	0.00	0.00	0.00	0.00	0.00	0.00	0.00	0.00	0.00	0.00	19.00	13.00	17.00
maker-tulip_contig_360_pilon_pilon-augustus-gene-1.42-mRNA-1	953.00	1084.00	967.00	281.00	293.00	318.00	308.00	413.00	240.00	654.00	595.00	646.00	2092.00	246.00	1009.00	538.00	211.00	416.00
maker-tulip_contig_317_pilon_pilon-augustus-gene-1.0-mRNA-1	2.00	0.00	0.00	1.00	1.00	3.00	4.00	3.00	1.00	3.00	1.00	5.00	2.00	1.00	1.00	0.00	0.00	1.00
augustus_masked-tulip_contig_381_pilon_pilon-processed-gene-0.19-mRNA-1	0.00	5.00	4.00	4.00	7.00	8.00	4.00	6.00	2.00	2.00	1.00	1.00	2.00	2.00	1.00	2.00	0.00	0.00
augustus_masked-tulip_contig_234_pilon_pilon-processed-gene-2.43-mRNA-1	1164.00	1115.00	1111.00	488.00	494.00	543.00	327.00	311.00	206.00	852.00	598.00	780.00	3342.00	469.00	1897.00	1173.00	330.00	1192.00
maker-tulip_contig_159_pilon_pilon-augustus-gene-1.5-mRNA-1	4615.00	4582.00	4654.00	214.00	231.00	235.00	329.00	356.00	210.00	657.00	627.00	645.00	2701.00	393.00	2283.00	263.00	111.00	255.00
augustus_masked-tulip_contig_781_pilon_pilon-processed-gene-6.8-mRNA-1	0.00	0.00	0.00	0.00	0.00	0.00	0.00	0.00	0.00	0.00	0.00	0.00	0.00	0.00	0.00	2.00	0.00	0.00
maker-tulip_contig_187_pilon_pilon-augustus-gene-1.84-mRNA-1	22.00	12.00	13.00	17.00	18.00	28.00	14.00	18.00	8.00	90.00	39.00	39.00	95.00	6.00	47.00	61.00	30.00	51.00
augustus_masked-tulip_contig_661_pilon_pilon-processed-gene-0.12-mRNA-1	85.00	105.00	107.00	86.00	84.00	92.00	42.00	41.00	30.00	147.00	132.00	111.00	567.00	67.00	394.00	64.00	29.00	57.00
augustus_masked-tulip_contig_254_pilon_pilon-processed-gene-0.37-mRNA-1	0.00	14.00	0.00	30.00	30.00	20.00	17.00	32.00	22.00	17.00	9.00	7.00	18.00	1.00	9.00	7.00	8.00	15.00
maker-tulip_contig_59_pilon_pilon-augustus-gene-0.43-mRNA-1	770.00	645.00	734.00	674.00	684.00	760.00	542.00	448.00	359.00	470.00	452.00	418.00	1104.00	126.00	762.00	882.00	255.00	805.00
augustus_masked-tulip_contig_837_pilon_pilon-processed-gene-4.8-mRNA-1	0.00	0.00	0.00	3.00	3.00	3.00	0.00	0.00	1.00	0.00	1.00	0.00	0.00	1.00	1.00	3.00	3.00	0.00
augustus_masked-tulip_contig_66_pilon_pilon-processed-gene-3.3-mRNA-1	67.00	21.00	43.00	137.00	36.00	24.00	76.00	105.00	64.00	604.00	268.00	183.00	265.00	5.00	90.00	330.00	82.00	159.00
augustus_masked-tulip_contig_506_pilon_pilon-processed-gene-1.1-mRNA-1	0.00	1.29	0.00	0.00	0.00	0.00	0.00	0.00	0.00	0.00	0.00	0.00	1.88	0.00	0.00	0.00	1.20	0.00
maker-tulip_contig_774_pilon_pilon-augustus-gene-0.63-mRNA-1	0.00	0.00	0.00	0.00	0.00	0.00	0.00	0.00	0.00	1.00	1.00	0.00	0.00	1.00	0.00	1.00	0.00	0.00
augustus_masked-tulip_contig_495_pilon_pilon-processed-gene-0.11-mRNA-1	0.00	0.00	3.00	6.00	16.00	19.00	13.00	31.00	7.00	1.00	0.00	0.00	5.00	2.00	9.00	7.00	5.00	3.00
maker-tulip_contig_691_pilon_pilon-augustus-gene-4.49-mRNA-1	0.00	0.00	0.00	0.00	0.00	0.00	0.00	0.00	0.00	2.00	1.00	2.00	2.00	0.00	1.00	2.00	0.00	0.00
maker-tulip_contig_59_pilon_pilon-augustus-gene-0.39-mRNA-1	1706.00	1509.00	1686.00	173.00	238.00	248.00	261.00	219.00	199.00	303.00	249.00	260.00	993.00	143.00	647.00	131.00	60.00	112.00
maker-tulip_contig_527_pilon_pilon-augustus-gene-4.59-mRNA-1	0.00	0.00	0.00	0.00	0.00	2.00	4.00	1.00	0.00	1.00	4.00	1.00	0.00	0.00	3.00	1.00	1.00	0.00
augustus_masked-tulip_contig_436_pilon_pilon-processed-gene-0.4-mRNA-1	0.00	0.00	0.00	0.00	0.00	0.00	0.00	0.00	0.00	0.00	0.00	0.00	0.00	0.00	0.00	0.00	0.00	0.00
maker-tulip_contig_194_pilon_pilon-augustus-gene-1.21-mRNA-1	19.00	26.00	33.00	27.00	17.00	9.00	19.00	17.00	11.00	94.00	61.00	76.00	485.00	57.00	234.00	14.00	9.00	20.00
maker-tulip_contig_807_pilon_pilon-augustus-gene-1.37-mRNA-1	177.00	198.00	201.00	85.00	106.00	84.00	80.00	68.00	64.00	104.00	89.00	97.00	575.00	72.00	333.00	79.00	31.00	76.00
maker-tulip_contig_58_pilon_pilon-augustus-gene-5.7-mRNA-1	2198.00	1316.00	1712.00	842.00	981.00	953.00	1233.00	1445.00	706.00	658.00	456.00	559.00	1336.00	140.00	770.00	314.00	125.00	272.00
maker-tulip_contig_60_pilon_pilon-augustus-gene-0.77-mRNA-1	0.00	0.00	0.00	0.00	0.00	0.00	0.00	0.00	0.00	0.00	0.00	0.00	0.00	0.00	0.00	847.00	246.00	981.00
augustus_masked-tulip_contig_413_pilon_pilon-processed-gene-0.1-mRNA-1	7.00	0.00	5.00	2.00	0.00	0.00	0.00	0.00	0.00	0.00	0.00	0.00	0.00	0.00	0.00	0.00	0.00	0.00
augustus_masked-tulip_contig_465_pilon_pilon-processed-gene-0.126-mRNA-1	169.00	172.00	194.00	144.00	154.00	185.00	87.00	72.00	64.00	82.00	94.00	116.00	181.00	27.00	104.00	143.00	43.00	125.00
maker-tulip_contig_412_pilon_pilon-augustus-gene-0.58-mRNA-1	33.00	24.00	16.00	53.00	49.00	72.00	34.00	75.00	46.00	3.00	0.00	3.00	62.00	16.00	71.00	5.00	5.00	11.00
maker-tulip_contig_597_pilon_pilon-augustus-gene-4.31-mRNA-1	0.00	2.00	5.00	1.00	0.00	0.00	1.00	0.00	0.00	0.00	0.00	0.00	9.00	0.00	3.00	7.00	3.00	2.00
maker-tulip_contig_329_pilon_pilon-augustus-gene-0.19-mRNA-1	16.87	23.81	16.00	25.14	24.18	18.64	29.64	24.91	9.32	53.55	16.15	36.19	83.55	15.28	72.06	34.14	23.73	26.04
maker-tulip_contig_208_pilon_pilon-augustus-gene-0.17-mRNA-1	3.00	1.00	0.00	95.00	30.00	135.00	114.00	52.00	58.00	120.00	102.00	112.00	172.00	23.00	68.00	235.00	53.00	215.00
maker-tulip_contig_284_pilon_pilon-augustus-gene-0.0-mRNA-1	0.00	1.00	0.00	1022.00	1124.00	1010.00	109.00	86.00	66.00	70.00	63.00	71.00	43.00	2.00	21.00	60.00	23.00	44.00
augustus_masked-tulip_contig_738_pilon_pilon-processed-gene-0.21-mRNA-1	0.00	2.00	0.00	0.00	0.00	0.00	0.00	0.00	0.00	2.00	11.00	2.00	0.00	0.00	0.00	0.00	0.00	0.00
maker-tulip_contig_59_pilon_pilon-augustus-gene-1.97-mRNA-1	4.00	3.00	0.00	212.00	170.00	189.00	86.00	54.00	63.00	39.00	22.00	30.00	38.00	5.00	15.00	79.00	31.00	60.00
maker-tulip_contig_317_pilon_pilon-augustus-gene-1.10-mRNA-1	22.00	36.00	23.00	0.00	0.00	0.00	0.00	1.00	0.00	7.00	3.00	6.00	617.00	74.00	444.00	0.00	0.00	0.00
maker-tulip_contig_767_pilon_pilon-augustus-gene-0.47-mRNA-1	0.00	0.00	0.00	0.00	0.00	3.00	82.00	29.00	45.00	0.00	0.00	0.00	135.00	15.00	102.00	147.00	29.00	141.00
augustus_masked-tulip_contig_176_pilon_pilon-processed-gene-0.36-mRNA-1	0.00	0.00	0.00	0.00	0.00	0.00	0.00	0.00	0.00	0.00	0.00	0.00	0.00	0.00	1.00	1.00	0.00	1.00
maker-tulip_contig_362_pilon_pilon-augustus-gene-1.36-mRNA-1	1028.00	469.00	788.00	368.00	466.00	418.00	709.00	735.00	467.00	196.00	175.00	180.00	939.00	114.00	659.00	78.00	42.00	64.00
augustus_masked-tulip_contig_300_pilon_pilon-processed-gene-0.0-mRNA-1	0.00	0.00	0.00	0.00	0.00	0.00	0.00	0.00	0.00	0.00	0.00	0.00	0.00	0.00	0.00	0.00	0.00	0.00
maker-tulip_contig_3_pilon_pilon-augustus-gene-1.21-mRNA-1	0.00	0.00	0.00	0.00	0.00	0.00	0.00	0.00	0.00	0.00	0.00	0.00	0.00	0.00	0.00	0.00	0.00	0.00
maker-tulip_contig_44_pilon_pilon-augustus-gene-3.16-mRNA-1	121.00	86.00	111.00	115.00	46.00	88.00	144.00	44.00	95.00	1409.00	1336.00	1734.00	615.00	65.00	532.00	183.00	44.00	182.00
augustus_masked-tulip_contig_180_pilon_pilon-processed-gene-0.11-mRNA-1	0.00	0.00	0.00	0.00	0.00	0.00	0.00	0.00	0.00	0.00	0.00	0.00	0.00	0.00	0.00	0.00	0.00	0.00
maker-tulip_contig_279_pilon_pilon-augustus-gene-2.5-mRNA-1	1.00	5.00	2.00	216.00	248.00	174.00	22.00	30.00	9.00	8.00	3.00	4.00	7.00	2.00	8.00	6.00	6.00	9.00
augustus_masked-tulip_contig_881_pilon_pilon-processed-gene-1.70-mRNA-1	0.00	0.00	0.00	7.00	0.00	20.00	10.00	6.00	10.00	757.00	390.00	462.00	0.00	0.00	3.00	1.00	3.00	4.00
augustus_masked-tulip_contig_663_pilon_pilon-processed-gene-0.0-mRNA-1	0.00	0.00	0.00	17.00	6.00	12.00	25.00	21.00	8.00	8.00	3.00	4.00	5.00	0.00	0.00	3.00	1.00	1.00
maker-tulip_contig_687_pilon_pilon-augustus-gene-2.8-mRNA-1	0.00	1.00	1.00	24.00	28.00	22.00	7.00	6.00	5.00	52.00	42.00	51.00	17.00	1.00	8.00	9.00	3.00	9.00
augustus_masked-tulip_contig_586_pilon_pilon-processed-gene-10.16-mRNA-1	0.00	1.00	0.00	0.00	0.00	0.00	0.00	0.00	0.00	0.00	0.00	0.00	0.00	0.00	1.00	0.00	0.00	0.00
augustus_masked-tulip_contig_513_pilon_pilon-processed-gene-0.11-mRNA-1	0.00	0.00	0.00	0.00	0.00	4.00	0.00	0.00	0.00	1.00	0.00	0.00	0.00	0.00	0.00	2086.00	1003.00	2198.00
maker-tulip_contig_221_pilon_pilon-augustus-gene-0.37-mRNA-1	963.00	786.00	834.00	209.00	204.00	225.00	152.00	168.00	103.00	182.00	158.00	176.00	361.00	39.00	309.00	296.00	104.00	212.00
maker-tulip_contig_89_pilon_pilon-augustus-gene-3.14-mRNA-1	2.00	3.00	2.00	0.00	0.00	2.00	2.00	4.00	0.00	0.00	0.00	1.00	11.00	0.00	5.00	3.00	0.00	1.00
maker-tulip_contig_586_pilon_pilon-augustus-gene-5.38-mRNA-1	100.78	32.00	76.77	286.00	327.95	295.00	302.97	257.00	199.00	192.00	128.00	178.00	274.00	42.00	174.05	154.00	66.00	163.99
augustus_masked-tulip_contig_168_pilon_pilon-processed-gene-0.96-mRNA-1	4795.57	3528.23	4142.53	584.77	661.77	652.11	717.41	824.71	492.89	933.53	666.15	776.77	1943.80	297.61	1137.81	500.09	216.88	437.12
augustus_masked-tulip_contig_586_pilon_pilon-processed-gene-0.79-mRNA-1	0.00	0.00	0.00	0.00	1.00	1.00	0.00	0.00	0.00	0.00	1.00	0.00	6.00	1.00	6.00	1.00	0.00	1.00
maker-tulip_contig_95_pilon_pilon-augustus-gene-0.39-mRNA-1	10.00	12.00	22.00	186.00	242.00	184.00	64.00	73.00	49.00	394.00	274.00	368.00	70.00	9.00	37.00	45.00	14.00	27.00
maker-tulip_contig_584_pilon_pilon-augustus-gene-3.5-mRNA-1	5.00	4.00	5.00	13.00	12.00	17.00	7.00	10.00	5.00	10.00	7.00	4.00	46.00	6.00	30.00	8.00	7.00	8.00
maker-tulip_contig_508_pilon_pilon-augustus-gene-1.29-mRNA-1	1007.00	811.00	698.00	648.00	595.00	620.00	483.00	478.00	348.00	912.00	712.00	835.00	1919.00	229.00	1198.00	678.00	254.00	661.00
maker-tulip_contig_931_pilon_pilon-augustus-gene-1.21-mRNA-1	0.00	0.00	0.00	1.00	5.00	2.00	1.00	1.00	1.00	23.00	6.00	14.00	1.00	0.00	2.00	0.00	0.00	2.00
maker-tulip_contig_257_pilon_pilon-augustus-gene-0.9-mRNA-1	21.00	13.00	9.00	3.00	3.00	3.00	2.00	1.00	5.00	7.00	6.00	6.00	24.00	1.00	25.00	0.00	0.00	2.00
maker-tulip_contig_559_pilon_pilon-augustus-gene-3.13-mRNA-1	0.00	0.00	0.00	81.00	53.00	58.00	16.00	10.00	26.00	2.00	1.00	6.00	7.00	0.00	2.00	7.00	1.00	4.00
augustus_masked-tulip_contig_699_pilon_pilon-processed-gene-0.14-mRNA-1	0.00	0.00	0.00	0.00	0.00	0.00	0.00	0.00	0.00	0.00	0.00	0.00	0.00	0.00	0.00	0.00	0.00	0.00
augustus_masked-tulip_contig_247_pilon_pilon-processed-gene-1.83-mRNA-1	196.00	53.00	187.00	255.00	312.00	237.00	226.00	187.00	173.00	275.00	184.00	288.00	645.00	116.00	369.00	190.00	80.00	208.00
maker-tulip_contig_689_pilon_pilon-augustus-gene-4.28-mRNA-1	2486.00	1896.00	2346.00	825.00	704.00	723.00	528.00	493.00	320.00	846.00	838.00	911.00	1220.00	153.00	836.00	494.00	225.00	479.00
augustus_masked-tulip_contig_351_pilon_pilon-processed-gene-1.112-mRNA-1	216.70	146.90	238.27	11.42	9.94	15.12	81.62	114.35	49.25	18.66	12.94	35.88	449.39	50.85	210.12	0.00	4.64	0.00
maker-tulip_contig_515_pilon_pilon-augustus-gene-7.10-mRNA-1	0.00	4.00	0.00	0.00	0.00	0.00	0.00	0.00	0.00	0.00	0.00	1.00	0.00	0.00	1.00	1109.00	645.00	1015.00
augustus_masked-tulip_contig_620_pilon_pilon-processed-gene-0.20-mRNA-1	1.00	3.00	4.00	144.00	175.00	150.00	92.00	253.00	39.00	99.00	89.00	112.00	55.00	4.00	33.00	47.00	6.00	57.00
maker-tulip_contig_396_pilon_pilon-augustus-gene-0.17-mRNA-1	0.00	0.00	0.00	1.00	0.00	0.00	0.00	0.00	0.00	0.00	0.00	0.00	0.00	0.00	0.00	0.00	0.00	1.00
augustus_masked-tulip_contig_506_pilon_pilon-processed-gene-1.2-mRNA-1	0.00	0.00	0.00	0.00	0.00	0.00	0.00	0.00	0.00	0.00	0.00	0.00	5.00	0.00	0.00	0.00	0.00	0.00
maker-tulip_contig_181_pilon_pilon-augustus-gene-1.33-mRNA-1	920.32	833.42	892.20	1108.32	1048.92	1128.98	1315.06	1151.65	762.14	1093.28	1018.64	1030.70	1829.03	276.35	1421.52	1069.31	459.62	1298.18
maker-tulip_contig_44_pilon_pilon-augustus-gene-7.43-mRNA-1	272.00	320.00	300.00	269.00	351.00	345.00	293.00	377.00	180.00	346.00	276.00	280.00	922.00	111.00	595.00	683.00	311.00	583.00
maker-tulip_contig_405_pilon_pilon-augustus-gene-0.17-mRNA-1	7.00	5.00	3.00	7.00	12.00	8.00	5.00	5.00	1.00	14.00	5.00	13.00	26.00	5.00	13.00	9.00	4.00	3.00
maker-tulip_contig_740_pilon_pilon-augustus-gene-1.6-mRNA-1	1.00	0.00	0.00	9076.00	9559.00	11556.00	16541.00	10482.00	9358.00	7.00	2.00	5.00	1297.00	196.00	1200.00	1913.00	424.00	2031.00
maker-tulip_contig_230_pilon_pilon-augustus-gene-0.24-mRNA-1	1064.00	980.00	1163.00	558.00	532.00	599.00	513.00	437.00	326.00	1403.00	1536.00	1616.00	2141.00	299.00	1230.00	1465.00	524.00	1145.00
maker-tulip_contig_43_pilon_pilon-augustus-gene-6.38-mRNA-1	0.00	0.00	0.00	42.00	32.00	34.00	1.00	3.00	0.00	18.00	10.00	18.00	8.00	0.00	4.00	9.00	1.00	11.00
maker-tulip_contig_292_pilon_pilon-augustus-gene-0.40-mRNA-1	9.00	11.00	11.00	7.00	3.00	1.00	3.00	0.00	2.00	4.00	8.00	9.00	53.00	2.00	37.00	4.00	1.00	2.00
maker-tulip_contig_598_pilon_pilon-augustus-gene-0.104-mRNA-1	17.00	10.00	26.00	121.00	108.00	99.00	103.00	85.00	71.00	372.00	314.00	365.00	240.00	23.00	127.00	226.00	63.00	148.00
maker-tulip_contig_303_pilon_pilon-augustus-gene-0.58-mRNA-1	0.00	4.00	4.00	7.00	3.00	5.00	9.00	4.00	5.00	1.00	0.00	1.00	20.00	2.00	16.00	14.00	5.00	6.00
augustus_masked-tulip_contig_891_pilon_pilon-processed-gene-0.12-mRNA-1	0.00	0.00	0.00	0.00	0.00	0.00	0.00	0.00	0.00	0.00	0.00	0.00	0.00	0.00	0.00	0.00	0.00	0.00
augustus_masked-tulip_contig_289_pilon_pilon-processed-gene-0.9-mRNA-1	7.00	22.00	22.00	2469.00	2569.00	2204.00	2344.00	1366.00	978.00	102.00	108.00	129.00	1754.00	273.00	1230.00	1857.00	578.00	1695.00
augustus_masked-tulip_contig_89_pilon_pilon-processed-gene-3.5-mRNA-1	0.00	0.00	3.00	17.00	10.00	14.00	14.00	1.00	6.00	11.00	7.00	11.00	26.00	4.00	12.00	11.00	6.00	12.00
maker-tulip_contig_234_pilon_pilon-augustus-gene-5.45-mRNA-1	0.00	2.00	0.00	57.00	50.00	46.00	13.00	17.00	9.00	22.00	17.00	17.00	8.00	3.00	4.00	12.00	8.00	17.00
augustus_masked-tulip_contig_307_pilon_pilon-processed-gene-1.39-mRNA-1	0.00	1.00	0.00	2.00	1.00	2.00	2.00	0.00	0.00	0.00	1.00	0.00	26.00	2.00	21.00	12.00	2.00	7.00
maker-tulip_contig_73_pilon_pilon-augustus-gene-0.41-mRNA-1	0.00	0.00	0.00	0.00	0.00	0.00	0.00	0.00	0.00	0.00	0.00	0.00	0.00	0.00	0.00	265.00	128.00	262.00
maker-tulip_contig_161_pilon_pilon-augustus-gene-0.69-mRNA-1	362.00	225.00	390.00	376.00	558.00	504.00	346.00	230.00	144.00	303.00	232.00	357.00	73.00	5.00	106.00	53.00	11.00	37.00
augustus_masked-tulip_contig_505_pilon_pilon-processed-gene-2.23-mRNA-1	0.00	2.00	1.00	0.00	1.00	6.00	2.00	0.00	1.00	4.00	6.00	1.00	1.00	1.00	0.00	0.00	0.00	2.65
maker-tulip_contig_515_pilon_pilon-augustus-gene-0.14-mRNA-1	0.00	0.00	0.00	3.00	10.00	36.00	1626.00	1264.00	588.00	45.00	31.00	27.00	2.00	2.00	4.00	0.00	0.00	1.00
maker-tulip_contig_525_pilon_pilon-augustus-gene-2.11-mRNA-1	0.00	0.00	0.00	0.00	0.00	0.00	0.00	0.00	0.00	0.00	0.00	0.00	0.00	0.00	0.00	0.00	0.00	0.00
maker-tulip_contig_380_pilon_pilon-augustus-gene-0.39-mRNA-1	12793.00	12820.00	11584.00	6301.00	6920.00	6939.00	8299.00	8516.00	4320.00	5715.00	3824.00	4405.00	6887.00	1005.00	4907.00	3251.00	969.00	2107.00
maker-tulip_contig_429_pilon_pilon-augustus-gene-1.16-mRNA-1	49.00	50.00	51.00	145.00	256.00	173.00	124.00	169.00	55.00	76.00	65.00	70.00	317.00	40.00	154.00	89.00	30.00	71.00
maker-tulip_contig_211_pilon_pilon-augustus-gene-1.85-mRNA-1	88.53	149.37	119.98	41.91	36.41	40.71	14.50	8.00	17.00	77.41	72.68	65.65	48.52	6.02	27.96	59.10	19.44	49.67
maker-tulip_contig_429_pilon_pilon-augustus-gene-3.52-mRNA-1	32.00	20.00	18.00	474.00	608.00	487.00	95.00	53.00	52.00	64.00	38.00	56.00	42.00	11.00	29.00	39.00	29.00	53.00
maker-tulip_contig_31_pilon_pilon-augustus-gene-1.75-mRNA-1	12.00	3.00	19.00	7.00	9.00	12.00	22.00	19.00	3.00	53.00	16.00	29.00	59.00	8.00	55.00	44.00	12.00	28.00
augustus_masked-tulip_contig_58_pilon_pilon-processed-gene-5.59-mRNA-1	45.00	15.00	55.00	90.00	67.00	92.00	39.00	66.00	50.00	73.00	48.00	45.00	306.00	41.00	205.00	37.00	18.00	41.00
augustus_masked-tulip_contig_515_pilon_pilon-processed-gene-7.76-mRNA-1	690.00	311.00	430.00	186.00	237.00	188.00	304.00	285.00	248.00	63.00	44.00	74.00	362.00	50.00	309.00	16.00	11.00	23.00
maker-tulip_contig_146_pilon_pilon-augustus-gene-0.9-mRNA-1	0.00	0.00	1.00	2.00	0.00	1.00	2.00	2.00	0.00	0.00	3.00	0.00	0.00	0.00	1.00	6.00	0.00	4.00
augustus_masked-tulip_contig_209_pilon_pilon-processed-gene-1.231-mRNA-1	2058.00	1747.00	1918.00	778.00	784.00	814.00	462.00	382.00	354.00	824.00	683.00	781.00	1417.00	181.00	894.00	545.00	202.00	548.00
maker-tulip_contig_741_pilon_pilon-augustus-gene-0.22-mRNA-1	2.00	1.00	0.00	28.00	11.00	24.00	19.00	78.00	20.00	267.00	116.00	189.00	25.00	0.00	8.00	14.00	3.00	20.00
maker-tulip_contig_623_pilon_pilon-augustus-gene-1.52-mRNA-1	0.00	0.00	0.00	8.00	6.00	4.00	2.00	0.00	0.00	0.00	0.00	1.00	0.00	0.00	0.00	63.00	31.00	32.00
augustus_masked-tulip_contig_690_pilon_pilon-processed-gene-2.19-mRNA-1	85.00	94.00	66.00	4.00	6.00	3.00	2.00	1.00	2.00	6.00	6.00	9.00	814.00	112.00	450.00	1.00	1.00	4.00
maker-tulip_contig_711_pilon_pilon-augustus-gene-0.55-mRNA-1	3.00	3.00	4.00	0.00	0.00	0.00	0.00	2.00	2.00	1.00	1.00	3.00	5.00	1.00	3.00	1.00	0.00	0.00
augustus_masked-tulip_contig_770_pilon_pilon-processed-gene-0.44-mRNA-1	0.00	0.00	0.00	5.00	12.00	3.00	2.00	2.00	0.00	11.00	2.00	6.00	4.00	0.00	0.00	0.00	1.00	2.00
maker-tulip_contig_270_pilon_pilon-augustus-gene-3.142-mRNA-1	15024.00	15223.00	15258.00	6705.00	7233.00	7241.00	9487.00	9485.00	5368.00	5807.00	3803.00	4235.00	6128.00	867.00	4378.00	2719.00	856.00	1952.00
augustus_masked-tulip_contig_321_pilon_pilon-processed-gene-1.3-mRNA-1	0.00	0.00	0.00	3.00	0.00	0.00	0.00	0.00	0.00	1.00	1.00	0.00	2.00	0.00	1.00	1.00	0.00	2.00
maker-tulip_contig_42_pilon_pilon-augustus-gene-1.54-mRNA-1	21.00	8.00	23.00	106.00	93.00	88.00	515.00	304.00	271.00	218.00	268.00	284.00	194.00	39.00	178.00	131.00	56.00	164.00
maker-tulip_contig_927_pilon_pilon-augustus-gene-0.48-mRNA-1	5.00	15.00	8.00	27.00	30.00	14.00	18.00	15.00	9.00	20.00	12.00	18.00	24.00	3.00	24.00	17.00	7.00	5.00
maker-tulip_contig_145_pilon_pilon-augustus-gene-6.27-mRNA-1	0.00	0.00	0.00	228.00	167.00	241.00	243.00	179.00	178.00	112.00	104.00	123.00	84.00	6.00	25.00	85.00	11.00	62.00
maker-tulip_contig_326_pilon_pilon-augustus-gene-2.22-mRNA-1	0.00	0.00	0.00	0.00	0.00	0.00	0.00	0.00	0.00	0.00	0.00	0.00	0.00	0.00	0.00	0.00	0.00	0.00
augustus_masked-tulip_contig_860_pilon_pilon-processed-gene-4.22-mRNA-1	0.00	2.68	0.00	0.00	0.00	0.00	0.00	0.00	0.00	0.00	0.00	0.00	0.00	0.00	0.00	0.00	0.00	0.00
maker-tulip_contig_199_pilon_pilon-augustus-gene-5.19-mRNA-1	0.00	0.00	0.00	0.00	0.00	0.00	0.00	0.00	0.00	0.00	0.00	0.00	0.00	0.00	0.00	0.00	0.00	0.00
maker-tulip_contig_61_pilon_pilon-augustus-gene-0.16-mRNA-1	7.00	7.00	9.00	91.00	123.00	95.00	57.00	28.00	19.00	13.00	7.00	12.00	57.00	6.00	27.00	60.00	25.00	90.00
maker-tulip_contig_465_pilon_pilon-augustus-gene-0.24-mRNA-1	96.00	186.00	189.00	92.00	119.00	134.00	38.00	26.00	30.00	78.00	78.00	116.00	402.00	41.00	311.00	148.00	28.00	101.00
maker-tulip_contig_871_pilon_pilon-augustus-gene-0.3-mRNA-1	0.00	0.00	0.00	1.00	0.00	2.00	0.00	0.00	0.00	0.00	0.00	0.00	0.00	0.00	1.00	0.00	0.00	0.00
augustus_masked-tulip_contig_454_pilon_pilon-processed-gene-0.2-mRNA-1	0.00	0.00	4.00	42.00	20.00	26.00	21.00	26.00	10.00	16.00	10.00	9.00	66.00	4.00	36.00	20.00	14.00	46.00
maker-tulip_contig_39_pilon_pilon-augustus-gene-1.107-mRNA-1	0.00	0.00	0.00	0.00	4.00	4.00	102.00	14.00	50.00	1.00	3.00	6.00	257.00	28.00	128.00	395.00	171.00	275.00
maker-tulip_contig_333_pilon_pilon-augustus-gene-3.69-mRNA-1	0.00	0.00	0.00	199.00	266.00	272.00	23.00	41.00	10.00	10.00	25.00	21.00	4.00	0.00	0.00	5.00	2.00	3.00
augustus_masked-tulip_contig_264_pilon_pilon-processed-gene-0.23-mRNA-1	0.00	1.00	0.00	1.00	4.00	0.00	0.00	1.00	0.00	0.00	0.00	0.00	0.00	0.00	6.00	10802.00	8093.00	16970.00
augustus_masked-tulip_contig_193_pilon_pilon-processed-gene-0.1-mRNA-1	0.00	0.00	1.00	1.00	2.00	0.00	3.00	0.00	0.00	8.00	3.00	0.00	0.00	0.00	0.00	1.00	0.00	5.00
augustus_masked-tulip_contig_806_pilon_pilon-processed-gene-0.7-mRNA-1	5.00	2.00	4.00	21.00	25.00	11.00	26.83	22.00	12.00	140.29	12.00	63.47	8.00	1.00	1.00	4.00	2.76	0.00
augustus_masked-tulip_contig_584_pilon_pilon-processed-gene-3.71-mRNA-1	0.00	0.00	0.00	1.00	0.00	1.00	0.00	0.00	0.00	2.00	3.00	1.00	0.00	0.00	0.00	1.00	0.00	0.00
augustus_masked-tulip_contig_167_pilon_pilon-processed-gene-0.1-mRNA-1	0.00	3.00	1.00	0.00	0.00	0.00	0.00	0.00	1.00	1.00	0.00	0.00	4.00	1.00	4.00	0.00	0.00	2.00
maker-tulip_contig_623_pilon_pilon-augustus-gene-0.1-mRNA-1	0.00	0.00	0.00	3.00	2.00	5.00	8.00	6.00	4.00	21.00	16.00	22.00	25.00	2.00	15.00	13.00	6.00	24.00
maker-tulip_contig_732_pilon_pilon-augustus-gene-4.25-mRNA-1	9.44	15.26	9.38	25.33	35.57	36.95	22.85	26.83	18.57	23.25	22.28	12.31	60.30	10.91	66.10	12.08	6.03	17.49
maker-tulip_contig_693_pilon_pilon-augustus-gene-0.6-mRNA-1	3.00	7.00	4.00	27.00	8.00	10.00	8.00	7.00	4.00	45.00	27.00	58.00	37.00	4.00	17.00	9.00	0.00	8.00
augustus_masked-tulip_contig_831_pilon_pilon-processed-gene-0.27-mRNA-1	0.00	0.00	0.00	0.00	0.00	0.00	0.00	0.00	0.00	1.00	0.00	0.00	0.00	0.00	0.00	34.00	31.00	61.00
maker-tulip_contig_801_pilon_pilon-augustus-gene-0.0-mRNA-1	5.00	6.00	3.00	53.00	49.00	52.00	252.00	142.00	219.00	22.00	12.00	20.00	47.00	5.00	11.00	57.00	16.00	46.00
maker-tulip_contig_121_pilon_pilon-augustus-gene-4.0-mRNA-1	27063.00	19438.00	24292.00	2472.00	3571.00	3138.00	6528.00	6736.00	4709.00	2032.00	1662.00	1944.00	7220.00	964.00	4113.00	271.00	164.00	308.00
augustus_masked-tulip_contig_740_pilon_pilon-processed-gene-0.0-mRNA-1	0.00	0.00	0.00	0.00	0.00	0.00	0.00	0.00	0.00	0.00	0.00	0.00	0.00	0.00	0.00	0.00	0.00	0.00
maker-tulip_contig_715_pilon_pilon-augustus-gene-5.76-mRNA-1	77.00	38.00	44.00	189.00	292.00	204.00	72.00	51.00	34.00	147.00	90.00	133.00	344.00	64.00	249.00	80.00	22.00	180.00
augustus_masked-tulip_contig_401_pilon_pilon-processed-gene-0.8-mRNA-1	0.00	0.00	0.00	0.00	0.00	0.00	0.00	0.00	0.00	0.00	0.00	0.00	2.00	0.00	0.00	52.00	21.00	50.00
augustus_masked-tulip_contig_316_pilon_pilon-processed-gene-1.11-mRNA-1	5.00	0.00	0.00	10.00	4.00	8.00	13.00	3.00	0.00	11.00	7.00	10.00	33.00	4.00	17.00	4.00	5.00	18.00
maker-tulip_contig_43_pilon_pilon-augustus-gene-4.8-mRNA-1	188.00	229.00	213.00	143.00	116.00	145.00	91.00	85.00	53.00	160.00	117.00	153.00	118.00	16.00	90.00	68.00	16.00	50.00
maker-tulip_contig_586_pilon_pilon-augustus-gene-1.8-mRNA-1	0.00	0.00	0.00	0.00	0.00	1.00	0.00	0.00	0.00	0.00	0.00	0.00	0.00	0.00	0.00	14.00	5.00	13.00
maker-tulip_contig_555_pilon_pilon-augustus-gene-2.51-mRNA-1	75.00	59.00	90.00	189.00	249.00	215.00	172.00	147.00	168.00	232.00	156.00	222.00	1434.00	184.00	764.00	169.00	72.00	175.00
maker-tulip_contig_770_pilon_pilon-augustus-gene-0.24-mRNA-1	25.00	50.00	22.00	20.00	19.00	16.00	39.00	24.00	22.00	120.00	37.00	62.00	60.00	9.00	33.00	24.00	10.00	28.00
augustus_masked-tulip_contig_357_pilon_pilon-processed-gene-1.54-mRNA-1	6.00	5.00	1.00	15.00	24.00	23.00	6.00	5.00	3.00	21.00	15.00	17.00	49.00	12.00	39.00	50.00	9.00	37.00
augustus_masked-tulip_contig_1_pilon_pilon-processed-gene-3.61-mRNA-1	2.00	4.00	4.00	82.00	40.00	57.00	63.00	56.00	49.00	20.00	13.00	14.00	78.00	21.00	85.00	41.00	16.00	67.00
maker-tulip_contig_333_pilon_pilon-augustus-gene-3.119-mRNA-1	5.00	8.00	8.00	274.00	179.00	247.00	161.00	91.00	86.00	45.00	48.00	43.00	242.00	34.00	155.00	162.00	39.00	170.94
augustus_masked-tulip_contig_344_pilon_pilon-processed-gene-0.25-mRNA-1	0.00	1.00	0.00	0.00	3.00	2.00	2.00	5.00	0.00	5.00	1.00	4.00	2.00	1.00	1.00	0.00	0.00	0.00
maker-tulip_contig_89_pilon_pilon-augustus-gene-0.30-mRNA-1	24.53	23.00	20.81	809.00	866.07	822.00	127.93	125.04	92.70	83.00	55.00	93.00	55.79	9.75	68.16	74.76	31.00	36.00
maker-tulip_contig_674_pilon_pilon-augustus-gene-9.25-mRNA-1	2.00	4.00	4.00	22.00	18.00	15.00	24.00	28.00	3.00	8.00	7.00	10.00	34.00	2.00	33.00	31.00	9.00	38.00
maker-tulip_contig_704_pilon_pilon-augustus-gene-2.26-mRNA-1	15.00	25.00	40.00	29.00	46.00	50.00	92.00	78.00	62.00	1218.00	976.00	1187.00	2146.00	259.00	2262.00	5426.08	967.66	4685.01
maker-tulip_contig_852_pilon_pilon-augustus-gene-0.23-mRNA-1	0.00	0.00	0.00	17.00	10.00	11.00	29.00	23.00	26.00	1.00	0.00	1.00	3.00	2.00	3.00	3.00	1.00	2.00
maker-tulip_contig_407_pilon_pilon-augustus-gene-7.87-mRNA-1	0.00	0.00	0.00	0.00	0.00	0.00	0.00	0.00	0.00	0.00	0.00	0.00	1.00	0.00	0.00	0.00	0.00	0.00
maker-tulip_contig_3_pilon_pilon-augustus-gene-5.29-mRNA-1	0.00	2.00	0.00	0.00	1.00	0.00	1.00	3.00	0.00	0.00	0.00	0.00	0.00	0.00	0.00	24.00	9.00	18.00
maker-tulip_contig_661_pilon_pilon-augustus-gene-1.37-mRNA-1	13.16	13.68	32.20	0.00	1.00	0.00	0.00	2.00	0.00	3.16	2.00	0.00	3.82	0.00	0.00	0.00	0.00	4.00
maker-tulip_contig_806_pilon_pilon-augustus-gene-1.10-mRNA-1	0.00	1.00	0.00	0.00	1.00	0.00	1.00	0.00	1.00	23.00	8.00	13.00	7.00	3.00	3.00	24.00	1.00	12.00
maker-tulip_contig_669_pilon_pilon-augustus-gene-0.4-mRNA-1	0.00	0.00	2.00	0.00	5.00	0.00	2.00	1.00	0.00	0.00	0.00	1.00	0.00	0.00	1.00	3412.00	1958.00	3570.00
augustus_masked-tulip_contig_190_pilon_pilon-processed-gene-0.2-mRNA-1	0.00	0.00	0.00	0.00	0.00	0.00	0.00	1.00	0.00	0.00	0.00	0.00	0.00	0.00	0.00	0.00	0.00	0.00
maker-tulip_contig_58_pilon_pilon-augustus-gene-0.50-mRNA-1	0.00	0.00	0.00	0.00	0.00	1.00	0.00	0.00	0.00	0.00	0.00	0.00	0.00	0.00	0.00	1.00	0.00	0.00
maker-tulip_contig_376_pilon_pilon-augustus-gene-0.40-mRNA-1	13.00	16.00	22.00	72.00	54.00	45.00	32.00	40.00	46.00	103.00	107.00	125.00	242.00	30.00	151.00	91.00	29.00	86.00
maker-tulip_contig_474_pilon_pilon-augustus-gene-0.24-mRNA-1	69.00	20.00	22.00	6.00	3.00	4.00	11.00	9.00	12.00	348.00	434.00	530.00	82.00	5.00	15.00	23.00	1.00	20.00
maker-tulip_contig_667_pilon_pilon-augustus-gene-0.91-mRNA-1	2674.00	2159.00	2557.00	3701.00	3678.00	3927.00	2216.00	1696.00	1560.00	2520.00	2318.00	2696.00	2628.00	304.00	1556.00	2556.00	701.00	2482.00
maker-tulip_contig_317_pilon_pilon-augustus-gene-1.62-mRNA-1	2.00	18.00	2.00	0.00	2.00	2.00	0.00	6.99	0.00	17.42	8.00	19.51	8.00	2.00	8.00	0.00	3.00	0.00
augustus_masked-tulip_contig_272_pilon_pilon-processed-gene-2.50-mRNA-1	591.00	412.85	549.00	2656.00	2060.00	2766.00	2558.05	1764.00	1638.00	1846.96	1666.00	1799.00	1635.77	155.14	916.01	1390.01	403.65	1364.69
augustus_masked-tulip_contig_505_pilon_pilon-processed-gene-2.20-mRNA-1	0.00	0.00	0.00	0.00	0.00	0.00	0.00	0.00	0.00	0.00	0.00	0.00	9.00	0.00	0.00	0.00	0.00	0.00
maker-tulip_contig_618_pilon_pilon-augustus-gene-2.2-mRNA-1	0.00	0.00	0.00	6.00	8.00	10.00	0.00	0.00	2.00	0.00	0.00	0.00	0.00	0.00	0.00	84.00	59.00	88.00
augustus_masked-tulip_contig_33_pilon_pilon-processed-gene-1.16-mRNA-1	49.00	21.00	58.00	7.00	18.00	17.00	39.00	22.00	16.00	61.00	30.00	48.00	119.00	16.00	55.00	16.00	3.00	13.00
augustus_masked-tulip_contig_274_pilon_pilon-processed-gene-2.17-mRNA-1	0.00	0.00	0.00	1.00	6.00	1.00	0.00	0.00	0.00	0.00	0.00	0.00	0.00	0.00	0.00	0.00	0.00	0.00
maker-tulip_contig_417_pilon_pilon-augustus-gene-1.9-mRNA-1	1.00	3.00	5.00	68.00	71.00	53.00	17.00	8.00	23.00	47.00	23.00	27.00	46.00	10.00	38.00	28.00	15.00	37.00
maker-tulip_contig_323_pilon_pilon-augustus-gene-6.28-mRNA-1	0.00	0.00	0.00	0.00	0.00	0.00	0.00	0.00	0.00	2.00	0.00	0.00	0.00	0.00	0.00	0.00	0.00	0.00
augustus_masked-tulip_contig_2_pilon_pilon-processed-gene-7.12-mRNA-1	0.00	0.00	0.00	0.00	0.00	0.00	0.00	2.00	0.00	1.00	0.00	1.00	0.00	0.00	0.00	1.00	1.00	0.00
maker-tulip_contig_327_pilon_pilon-augustus-gene-7.15-mRNA-1	0.00	1.00	0.00	381.00	464.00	301.00	132.00	98.00	73.00	15.00	10.00	15.00	33.00	4.00	17.00	26.00	7.00	31.00
augustus_masked-tulip_contig_417_pilon_pilon-processed-gene-1.25-mRNA-1	585.00	665.00	624.00	540.00	390.00	452.00	659.00	374.00	391.00	846.00	729.00	745.00	2658.00	290.00	1534.00	1749.00	556.00	1209.00
maker-tulip_contig_473_pilon_pilon-augustus-gene-2.15-mRNA-1	28.00	14.00	25.00	358.00	416.00	378.00	38.00	32.00	58.00	11.00	7.00	7.00	17.00	5.00	8.00	25.00	12.00	15.00
augustus_masked-tulip_contig_581_pilon_pilon-processed-gene-3.2-mRNA-1	16.00	4.00	3.00	365.00	298.00	308.00	2217.00	1788.00	1398.00	720.00	1067.00	1165.00	619.00	55.00	188.00	280.00	112.00	248.00
maker-tulip_contig_3_pilon_pilon-augustus-gene-2.4-mRNA-1	0.00	0.00	0.00	31.00	0.00	29.00	9.00	11.00	5.00	0.00	0.00	1.00	95.00	14.00	74.00	207.00	81.00	172.00
maker-tulip_contig_691_pilon_pilon-augustus-gene-4.54-mRNA-1	0.00	1.00	0.00	0.00	0.00	0.00	1.00	1.00	0.00	23.00	12.00	6.00	0.00	0.00	0.00	1.00	0.00	0.00
maker-tulip_contig_327_pilon_pilon-augustus-gene-9.33-mRNA-1	2.00	1.00	0.00	7.00	8.00	6.00	21.00	10.00	11.00	6.00	2.00	2.00	11.00	2.00	5.00	10.00	1.00	7.00
maker-tulip_contig_837_pilon_pilon-augustus-gene-9.46-mRNA-1	2.00	1.00	1.00	141.00	158.00	118.00	45.00	116.00	46.00	8.00	2.00	7.00	21.00	5.00	39.00	32.00	5.00	25.00
augustus_masked-tulip_contig_102_pilon_pilon-processed-gene-0.22-mRNA-1	408.00	463.00	445.00	481.00	520.00	516.00	512.00	436.00	318.00	360.00	294.40	358.00	984.00	122.00	633.00	1080.00	418.00	874.00
maker-tulip_contig_89_pilon_pilon-augustus-gene-4.29-mRNA-1	0.00	0.00	0.00	0.00	0.00	3.00	131.00	206.00	83.00	11.00	18.00	17.00	0.00	0.00	0.00	0.00	0.00	0.00
maker-tulip_contig_54_pilon_pilon-augustus-gene-2.25-mRNA-1	0.00	0.00	0.00	1.00	9.00	33.00	267.00	417.00	100.00	0.00	0.00	0.00	0.00	0.00	0.00	0.00	0.00	0.00
augustus_masked-tulip_contig_66_pilon_pilon-processed-gene-0.65-mRNA-1	42.00	45.00	28.00	6.00	8.00	12.00	8.00	14.00	3.00	12.00	2.00	7.00	20.00	4.00	19.00	0.00	1.00	8.00
maker-tulip_contig_441_pilon_pilon-augustus-gene-2.5-mRNA-1	5.00	5.00	11.00	65.00	101.00	117.00	65.00	79.00	21.00	9.00	16.00	26.00	27.00	2.00	17.00	23.00	5.00	10.00
maker-tulip_contig_806_pilon_pilon-augustus-gene-0.4-mRNA-1	0.00	2.00	0.00	17.00	18.00	7.00	86.00	49.00	72.00	151.00	168.00	148.00	56.00	8.00	49.00	99.00	18.00	87.00
maker-tulip_contig_448_pilon_pilon-augustus-gene-0.33-mRNA-1	2.00	1.00	10.00	3.00	0.00	2.00	0.00	2.00	0.00	42.00	26.00	27.00	30.00	4.00	21.00	27.00	19.00	67.00
maker-tulip_contig_290_pilon_pilon-augustus-gene-1.26-mRNA-1	0.00	0.00	0.00	0.00	1.00	1.00	1.00	3.00	0.00	1.00	2.00	2.00	0.00	0.00	0.00	1.00	1.00	2.00
maker-tulip_contig_479_pilon_pilon-augustus-gene-3.20-mRNA-1	1.52	0.00	0.00	0.00	0.00	22.12	658.20	165.99	307.10	18.63	27.04	18.36	0.00	0.00	1.00	0.00	0.00	1.52
maker-tulip_contig_402_pilon_pilon-augustus-gene-2.43-mRNA-1	260.00	217.00	226.00	93.00	121.00	110.00	86.00	98.00	63.00	114.00	104.00	112.00	796.00	94.00	511.00	67.00	26.00	51.00
maker-tulip_contig_125_pilon_pilon-augustus-gene-0.307-mRNA-1	416.00	335.00	388.00	1201.00	1230.00	1256.00	859.00	942.00	552.00	245.00	170.00	223.00	2024.00	202.00	847.00	1787.00	347.00	1399.00
maker-tulip_contig_381_pilon_pilon-augustus-gene-0.88-mRNA-1	163.00	200.00	141.00	259.00	238.00	248.00	233.00	136.00	145.00	123.00	83.00	143.00	201.00	36.00	152.00	71.00	21.00	76.00
maker-tulip_contig_523_pilon_pilon-augustus-gene-0.76-mRNA-1	1291.00	1409.00	1398.00	12.00	11.00	8.00	20.00	52.00	34.00	218.00	161.00	187.00	412.00	56.00	349.00	49.00	24.00	62.00
maker-tulip_contig_473_pilon_pilon-augustus-gene-2.5-mRNA-1	0.00	0.00	0.00	0.00	0.00	0.00	0.00	0.00	0.00	0.00	0.00	0.00	0.00	0.00	0.00	1.00	1.00	2.00
augustus_masked-tulip_contig_661_pilon_pilon-processed-gene-0.10-mRNA-1	0.00	0.00	0.00	0.00	0.00	0.00	0.00	0.00	0.00	0.00	0.00	0.00	0.00	0.00	0.00	0.00	0.00	0.00
maker-tulip_contig_3_pilon_pilon-augustus-gene-1.33-mRNA-1	0.00	1.00	0.00	0.00	0.00	0.00	0.00	0.00	0.00	0.00	0.00	1.00	0.00	1.00	2.00	39.00	30.00	37.00
maker-tulip_contig_519_pilon_pilon-augustus-gene-0.17-mRNA-1	0.00	0.00	0.00	0.00	1.00	0.00	0.00	3.00	0.00	0.00	0.00	0.00	0.00	0.00	0.00	20.00	4.00	23.00
maker-tulip_contig_867_pilon_pilon-augustus-gene-3.33-mRNA-1	602.00	612.00	474.00	382.00	443.00	408.00	380.00	361.00	315.00	823.00	848.00	913.00	4113.00	559.00	2843.00	451.00	221.00	520.00
augustus_masked-tulip_contig_178_pilon_pilon-processed-gene-0.11-mRNA-1	0.00	1.00	2.00	4.00	13.00	8.00	5.00	8.00	3.00	19.00	15.00	13.00	3.00	1.00	1.00	7.00	0.00	2.00
augustus_masked-tulip_contig_473_pilon_pilon-processed-gene-1.11-mRNA-1	3.00	2.00	3.00	2.00	4.00	2.00	3.00	0.00	0.00	16.00	17.00	20.00	26.00	2.00	22.00	13.00	1.00	12.00
maker-tulip_contig_321_pilon_pilon-augustus-gene-0.2-mRNA-1	303.00	270.00	325.00	164.00	198.00	210.00	200.00	105.00	181.00	154.00	117.00	169.00	470.00	65.00	342.00	55.00	28.00	64.00
augustus_masked-tulip_contig_43_pilon_pilon-processed-gene-6.114-mRNA-1	194.00	174.00	243.00	65.00	69.00	72.00	32.00	32.00	21.00	131.00	121.00	127.00	414.00	59.00	305.00	34.00	19.00	32.00
maker-tulip_contig_547_pilon_pilon-augustus-gene-6.39-mRNA-1	0.00	7.00	1.00	143.00	163.00	170.00	18.00	12.00	14.00	7.00	3.00	2.00	10.00	1.00	5.00	34.00	12.00	26.00
maker-tulip_contig_907_pilon_pilon-augustus-gene-2.21-mRNA-1	107.00	119.00	104.00	33.00	25.00	46.00	42.00	23.00	17.00	106.00	57.00	65.00	119.00	16.00	66.00	84.00	25.00	45.00
augustus_masked-tulip_contig_204_pilon_pilon-processed-gene-1.46-mRNA-1	9.00	2.00	19.00	100.00	70.00	83.00	166.00	115.00	98.00	497.00	317.00	444.00	70.00	9.00	59.00	65.00	36.00	65.00
maker-tulip_contig_560_pilon_pilon-augustus-gene-3.19-mRNA-1	0.00	0.00	0.00	29.00	48.00	33.00	4.00	5.00	1.00	2.00	0.00	0.00	1.00	1.00	1.00	4.00	3.00	2.00
maker-tulip_contig_29_pilon_pilon-augustus-gene-1.34-mRNA-1	0.00	1.00	0.00	25.00	6.00	23.00	97.00	56.00	38.00	3.00	3.00	1.00	18.00	2.00	12.00	11.00	5.00	9.00
augustus_masked-tulip_contig_80_pilon_pilon-processed-gene-0.30-mRNA-1	913.00	299.00	704.00	192.00	296.00	243.00	332.00	330.00	182.00	491.00	438.00	504.00	885.00	93.00	515.00	225.00	98.00	237.00
augustus_masked-tulip_contig_784_pilon_pilon-processed-gene-0.34-mRNA-1	42.00	77.00	6.00	48.00	16.00	19.00	5.00	1.00	3.00	287.00	84.00	160.00	267.00	19.00	83.00	30.00	19.00	25.00
maker-tulip_contig_837_pilon_pilon-augustus-gene-7.25-mRNA-1	0.00	0.00	0.00	9.00	3.00	4.00	30.00	19.00	27.00	36.00	36.00	51.00	13.00	0.00	4.00	11.00	1.00	8.00
maker-tulip_contig_44_pilon_pilon-augustus-gene-6.22-mRNA-1	2.00	0.00	0.00	27.00	26.00	32.00	16.00	33.00	18.00	58.00	39.00	46.00	52.00	9.00	37.00	50.00	21.00	67.00
maker-tulip_contig_101_pilon_pilon-augustus-gene-0.11-mRNA-1	307.00	212.00	264.00	130.00	133.00	145.00	347.00	479.00	272.00	172.00	251.00	273.00	381.00	32.00	186.00	389.00	143.00	356.00
maker-tulip_contig_21_pilon_pilon-augustus-gene-0.26-mRNA-1	1.00	3.00	1.00	0.00	2.00	0.00	3.00	2.00	0.00	1.00	0.00	0.00	1.00	0.00	2.00	0.00	1.00	1.00
augustus_masked-tulip_contig_560_pilon_pilon-processed-gene-3.4-mRNA-1	0.00	0.00	0.00	62.00	72.00	75.00	86.00	47.00	43.00	4.00	2.00	5.00	23.00	1.00	15.00	28.00	8.00	31.00
maker-tulip_contig_441_pilon_pilon-augustus-gene-5.61-mRNA-1	529.00	427.00	504.00	321.00	336.00	288.00	77.00	74.00	60.00	169.00	199.00	181.00	1026.00	153.00	779.00	57.00	25.00	56.00
augustus_masked-tulip_contig_531_pilon_pilon-processed-gene-7.35-mRNA-1	0.25	0.00	0.25	0.25	0.25	0.75	0.00	0.25	0.25	0.50	0.00	0.00	5.75	0.75	0.00	3.00	0.25	1.25
maker-tulip_contig_361_pilon_pilon-augustus-gene-1.34-mRNA-1	223.00	149.00	220.00	373.00	336.00	396.00	364.00	259.00	232.00	536.00	431.00	480.00	1265.00	125.00	705.00	972.00	313.00	847.00
maker-tulip_contig_843_pilon_pilon-augustus-gene-9.64-mRNA-1	1.00	4.00	0.00	14.00	10.00	27.00	3.00	1.00	3.00	8.00	5.00	4.00	59.00	9.00	31.00	79.00	12.00	63.00
maker-tulip_contig_323_pilon_pilon-augustus-gene-5.3-mRNA-1	0.00	0.00	0.00	0.00	0.00	0.00	0.00	0.00	0.00	0.00	0.00	0.00	0.00	0.00	0.00	0.00	0.00	0.00
maker-tulip_contig_247_pilon_pilon-augustus-gene-2.134-mRNA-1	62.00	46.00	55.00	914.00	544.00	933.00	869.00	622.00	511.00	1168.00	706.00	821.00	2168.00	277.00	1300.00	2143.00	854.00	2434.00
augustus_masked-tulip_contig_339_pilon_pilon-processed-gene-0.16-mRNA-1	5.00	15.00	3.00	0.00	0.00	0.00	0.00	0.00	0.00	2.00	1.00	0.00	275.00	33.00	140.00	0.00	0.00	0.00
maker-tulip_contig_531_pilon_pilon-augustus-gene-3.5-mRNA-1	701.00	588.00	623.00	15.00	23.00	21.00	63.00	47.00	68.00	651.00	911.00	1103.00	1350.00	146.00	698.00	380.00	177.00	690.00
augustus_masked-tulip_contig_504_pilon_pilon-processed-gene-2.37-mRNA-1	0.00	0.00	0.00	1.00	0.00	2.00	0.00	0.00	0.00	0.00	0.00	0.00	0.00	0.00	0.00	3.00	2.00	1.00
maker-tulip_contig_422_pilon_pilon-augustus-gene-0.15-mRNA-1	351.00	257.00	272.00	1.00	0.00	0.00	0.00	0.00	0.00	0.00	0.00	0.00	384.00	44.00	360.00	0.00	0.00	0.00
augustus_masked-tulip_contig_597_pilon_pilon-processed-gene-5.59-mRNA-1	1.00	2.00	0.00	3.01	1.00	2.00	2.01	4.00	3.00	3.00	1.00	0.00	123.15	18.00	69.12	6.05	2.00	3.00
maker-tulip_contig_508_pilon_pilon-augustus-gene-1.2-mRNA-1	265.00	406.00	285.00	76.00	96.00	85.00	36.00	42.00	46.00	143.00	111.00	131.00	1039.00	124.00	724.00	184.00	121.00	396.00
maker-tulip_contig_121_pilon_pilon-augustus-gene-0.27-mRNA-1	0.00	0.00	0.00	8.00	3.00	5.00	19.00	15.00	9.00	0.00	0.00	0.00	4.00	1.00	1.00	2.00	3.00	2.00
maker-tulip_contig_441_pilon_pilon-augustus-gene-1.182-mRNA-1	38.00	15.00	14.00	0.00	1.00	0.00	15.00	2.00	84.00	15.00	11.00	5.00	1.00	0.00	0.00	2.00	0.00	0.00
augustus_masked-tulip_contig_702_pilon_pilon-processed-gene-0.11-mRNA-1	117.00	63.00	108.00	128.00	135.00	133.00	141.00	136.00	81.00	147.00	108.00	140.00	262.00	32.00	194.00	82.00	38.00	109.00
maker-tulip_contig_362_pilon_pilon-augustus-gene-4.13-mRNA-1	0.00	5.00	0.00	0.00	2.00	0.00	0.00	0.00	1.00	2.00	0.00	1.00	19.00	0.00	15.00	31.00	27.00	26.00
maker-tulip_contig_320_pilon_pilon-augustus-gene-0.10-mRNA-1	611.00	416.00	566.00	217.00	265.00	232.00	304.00	265.00	213.00	216.00	184.00	217.00	560.00	91.00	403.00	129.00	84.00	168.00
maker-tulip_contig_934_pilon_pilon-augustus-gene-4.18-mRNA-1	88.00	115.00	74.00	302.00	328.00	316.00	530.00	469.00	335.00	181.00	246.00	202.00	510.00	73.00	419.00	443.00	228.00	704.00
maker-tulip_contig_351_pilon_pilon-augustus-gene-1.29-mRNA-1	0.00	0.00	0.00	0.00	0.00	0.00	0.00	0.00	0.00	0.00	0.00	0.00	0.00	0.00	0.00	2.00	1.00	1.00
maker-tulip_contig_109_pilon_pilon-augustus-gene-0.7-mRNA-1	195.00	56.00	109.00	182.00	179.00	270.00	367.00	198.00	188.00	223.00	222.00	297.00	466.00	49.00	216.00	291.00	92.00	241.00
augustus_masked-tulip_contig_378_pilon_pilon-processed-gene-1.6-mRNA-1	1.00	3.00	1.00	0.00	2.00	1.00	3.00	1.00	3.00	8.00	1.00	2.00	4.00	0.00	1.00	0.00	0.00	0.00
maker-tulip_contig_168_pilon_pilon-augustus-gene-0.0-mRNA-1	0.00	1.00	2.00	5.00	4.00	2.00	1.00	2.00	1.00	4.00	1.00	2.00	6.00	0.00	5.00	0.00	1.00	3.00
maker-tulip_contig_586_pilon_pilon-augustus-gene-4.7-mRNA-1	0.00	0.00	0.00	0.00	0.00	0.00	0.00	0.00	0.00	0.00	0.00	0.00	0.00	0.00	0.00	0.00	0.00	0.00
augustus_masked-tulip_contig_768_pilon_pilon-processed-gene-0.8-mRNA-1	34.00	17.00	36.00	43.00	17.00	27.00	47.00	40.00	49.00	197.00	131.00	199.00	165.00	31.00	105.00	54.00	35.00	40.00
augustus_masked-tulip_contig_76_pilon_pilon-processed-gene-0.17-mRNA-1	0.00	0.00	0.00	1.00	2.00	0.00	0.00	0.00	0.00	0.00	0.00	0.00	0.00	0.00	0.00	0.00	0.00	0.00
maker-tulip_contig_907_pilon_pilon-augustus-gene-0.16-mRNA-1	0.00	0.00	0.00	0.00	0.00	0.00	0.00	0.00	0.00	0.00	0.00	0.00	0.00	0.00	0.00	0.00	0.00	0.00
maker-tulip_contig_417_pilon_pilon-augustus-gene-2.12-mRNA-1	0.00	0.00	0.00	0.00	0.00	0.00	0.00	0.00	0.00	0.00	0.00	0.00	0.00	0.00	0.00	0.00	0.00	0.00
maker-tulip_contig_531_pilon_pilon-augustus-gene-3.31-mRNA-1	219.00	92.00	118.00	467.00	410.00	446.00	550.00	430.00	259.00	256.00	186.00	244.00	1605.00	206.00	865.00	986.00	353.00	1365.00
maker-tulip_contig_515_pilon_pilon-augustus-gene-6.7-mRNA-1	3.00	2.00	12.00	1.00	1.00	4.00	1.00	2.00	0.00	6.00	2.00	1.00	29.00	3.00	11.00	1.00	2.00	2.00
maker-tulip_contig_527_pilon_pilon-augustus-gene-1.33-mRNA-1	111.00	70.00	89.00	61.00	27.00	29.00	51.00	40.00	41.00	114.00	103.00	133.00	265.00	41.00	166.00	36.00	19.00	53.00
maker-tulip_contig_637_pilon_pilon-augustus-gene-0.23-mRNA-1	0.00	0.80	0.00	0.00	0.00	0.00	0.00	0.00	1.00	0.00	0.00	0.00	0.00	0.00	0.00	0.00	0.00	0.00
maker-tulip_contig_837_pilon_pilon-augustus-gene-5.15-mRNA-1	66.00	34.00	33.00	19.00	17.00	30.00	24.00	14.00	12.00	92.00	48.00	58.00	84.00	15.00	52.00	34.00	16.00	47.00
augustus_masked-tulip_contig_768_pilon_pilon-processed-gene-0.18-mRNA-1	0.00	0.00	0.00	0.00	0.00	0.00	0.00	0.00	0.00	0.00	0.00	0.00	0.00	0.00	0.00	0.00	0.00	0.00
maker-tulip_contig_819_pilon_pilon-augustus-gene-0.50-mRNA-1	187.00	142.00	172.00	65.00	54.00	52.00	31.00	30.00	11.00	79.00	58.00	59.00	186.00	19.00	152.00	71.00	29.00	61.00
maker-tulip_contig_39_pilon_pilon-augustus-gene-1.131-mRNA-1	11.00	49.00	11.00	8.00	3.00	4.00	1.00	0.00	3.00	6.00	3.00	3.00	6.00	0.00	5.00	108.00	41.00	56.00
maker-tulip_contig_781_pilon_pilon-augustus-gene-2.4-mRNA-1	317.18	178.00	314.00	131.00	158.00	111.00	158.00	159.00	130.00	42.00	53.00	46.00	183.00	39.00	163.00	28.00	14.00	30.00
maker-tulip_contig_626_pilon_pilon-augustus-gene-1.46-mRNA-1	0.00	0.00	0.00	0.00	1.00	0.00	0.00	0.00	0.00	2.00	1.00	1.00	2174.00	454.78	2339.55	2.00	0.00	1.00
maker-tulip_contig_443_pilon_pilon-augustus-gene-1.37-mRNA-1	546.00	709.00	642.00	687.00	809.00	819.00	630.00	578.00	400.00	1498.00	1107.00	1237.00	3249.00	352.00	1756.00	1373.00	430.00	990.00
augustus_masked-tulip_contig_515_pilon_pilon-processed-gene-7.61-mRNA-1	26.00	45.00	36.00	37.00	64.00	41.00	17.00	13.00	10.00	112.00	100.00	93.00	132.00	19.00	82.00	22.00	13.00	13.00
augustus_masked-tulip_contig_208_pilon_pilon-processed-gene-1.12-mRNA-1	0.00	1.00	0.00	0.00	0.00	1.00	0.00	0.00	0.00	2.00	0.00	1.00	3927.00	684.00	3578.00	0.00	11.00	0.00
maker-tulip_contig_221_pilon_pilon-augustus-gene-0.62-mRNA-1	1883.00	2135.00	1619.00	2250.00	2106.00	2126.00	1197.00	1023.00	732.00	2166.00	1594.00	1899.00	3889.00	574.00	2904.00	897.00	342.00	1017.00
augustus_masked-tulip_contig_278_pilon_pilon-processed-gene-0.97-mRNA-1	0.00	0.00	0.00	1.00	0.00	0.00	1.00	0.00	0.00	1.00	0.00	0.00	1.00	0.00	0.00	3.00	0.00	0.00
augustus_masked-tulip_contig_437_pilon_pilon-processed-gene-0.93-mRNA-1	0.00	0.00	0.00	0.00	0.00	0.00	0.00	0.00	0.00	0.00	0.00	0.00	0.00	0.00	0.00	0.00	0.00	0.00
maker-tulip_contig_79_pilon_pilon-augustus-gene-0.7-mRNA-1	3077.00	1630.00	2232.00	933.00	1155.00	1173.00	1843.00	1867.00	1110.00	532.00	369.00	484.00	2885.00	347.00	1508.00	174.00	79.00	171.00
augustus_masked-tulip_contig_654_pilon_pilon-processed-gene-0.4-mRNA-1	0.00	0.00	0.00	149.00	147.00	196.00	340.00	99.00	153.00	4.00	2.00	2.00	166.00	12.00	55.00	226.00	102.61	323.00
maker-tulip_contig_603_pilon_pilon-augustus-gene-0.12-mRNA-1	0.00	3.00	0.00	8.00	6.00	13.00	6.00	6.00	10.00	31.00	20.00	26.00	2.00	1.00	4.00	6.00	0.00	2.00
maker-tulip_contig_191_pilon_pilon-augustus-gene-0.256-mRNA-1	0.00	0.00	0.00	0.00	0.00	7.00	156.45	20.11	29.24	0.00	0.00	0.00	0.00	0.00	1.00	0.00	0.00	0.00
maker-tulip_contig_870_pilon_pilon-augustus-gene-2.4-mRNA-1	0.00	0.00	0.00	3394.00	6580.00	6394.00	3133.00	3911.00	1235.00	14.00	18.00	8.00	2.00	0.00	0.00	0.00	0.00	1.00
maker-tulip_contig_334_pilon_pilon-augustus-gene-4.25-mRNA-1	112.00	84.00	125.00	63.00	66.00	76.00	30.00	17.00	21.00	111.00	71.00	91.00	36.00	3.00	21.00	14.00	11.00	19.00
maker-tulip_contig_505_pilon_pilon-augustus-gene-2.53-mRNA-1	8.00	3.00	2.00	8.00	3.00	11.00	11.00	21.00	5.00	17.00	8.00	17.00	40.00	5.00	23.00	1.00	1.00	11.00
augustus_masked-tulip_contig_69_pilon_pilon-processed-gene-0.36-mRNA-1	0.00	0.00	1.00	0.00	0.00	0.00	0.00	0.00	0.00	8.00	8.00	1.00	4.00	0.00	1.00	1.00	0.00	3.00
maker-tulip_contig_645_pilon_pilon-augustus-gene-5.2-mRNA-1	0.00	4.00	1.00	0.00	3.55	1.54	1.16	0.00	1.00	4.76	1.12	0.00	3.01	0.00	3.55	0.00	0.00	6.87
augustus_masked-tulip_contig_247_pilon_pilon-processed-gene-2.154-mRNA-1	0.00	3.01	0.00	26.81	11.99	16.69	82.27	56.32	52.28	15.24	24.65	36.10	6.86	0.00	3.46	11.65	5.92	2.37
maker-tulip_contig_168_pilon_pilon-augustus-gene-1.26-mRNA-1	3102.00	3361.00	3827.00	502.00	497.00	465.00	712.00	649.00	510.00	1898.00	1514.00	2046.00	1281.00	166.00	630.00	574.00	206.00	439.00
augustus_masked-tulip_contig_37_pilon_pilon-processed-gene-2.7-mRNA-1	0.00	0.00	0.00	0.00	0.00	0.00	0.00	0.00	0.00	0.00	0.00	0.00	0.00	0.00	0.00	0.00	0.00	0.00
maker-tulip_contig_698_pilon_pilon-augustus-gene-2.35-mRNA-1	578.00	679.00	613.00	896.00	855.00	1026.00	940.00	1008.00	602.00	377.00	256.00	206.00	1293.00	165.00	886.00	682.00	257.00	936.00
maker-tulip_contig_626_pilon_pilon-augustus-gene-0.22-mRNA-1	12.00	11.00	3.00	4.00	3.00	0.00	1.00	0.00	0.00	2.00	2.00	1.00	5.00	1.00	5.00	110.00	53.00	109.00
maker-tulip_contig_637_pilon_pilon-augustus-gene-1.14-mRNA-1	2.39	0.00	1.00	2.00	0.00	0.00	1.00	1.00	0.00	3.80	2.36	0.00	2.76	0.00	0.00	0.05	0.00	1.00
augustus_masked-tulip_contig_872_pilon_pilon-processed-gene-0.18-mRNA-1	92.18	60.99	58.74	63.60	65.58	75.85	36.50	38.12	33.50	36.50	33.60	40.00	81.70	8.60	58.00	82.75	41.00	110.79
maker-tulip_contig_474_pilon_pilon-augustus-gene-0.63-mRNA-1	207.00	150.00	201.00	769.00	775.00	690.00	373.00	299.00	236.00	469.00	420.00	461.00	683.00	104.00	539.00	372.00	197.00	446.00
maker-tulip_contig_199_pilon_pilon-augustus-gene-5.2-mRNA-1	0.00	0.00	0.00	0.00	0.00	0.00	0.00	0.00	0.00	0.00	0.00	0.00	0.00	0.00	0.00	0.00	0.00	0.00
augustus_masked-tulip_contig_611_pilon_pilon-processed-gene-0.5-mRNA-1	0.00	1.00	0.00	0.00	0.00	0.00	0.00	0.00	0.00	0.00	0.00	0.00	0.00	0.00	0.00	0.00	0.00	0.00
augustus_masked-tulip_contig_316_pilon_pilon-processed-gene-3.7-mRNA-1	0.00	0.00	0.00	0.37	0.00	0.00	0.00	0.00	0.00	0.00	0.00	0.00	0.00	0.00	0.00	0.00	0.00	0.00
augustus_masked-tulip_contig_773_pilon_pilon-processed-gene-4.16-mRNA-1	12.00	18.00	3.00	82.00	69.00	58.00	55.00	29.00	42.00	130.00	132.00	182.00	235.00	18.00	106.00	74.00	36.00	80.00
augustus_masked-tulip_contig_610_pilon_pilon-processed-gene-3.5-mRNA-1	57.00	50.00	89.00	64.00	104.00	95.00	114.00	132.00	64.00	39.00	32.00	28.00	97.00	6.00	69.00	43.00	13.00	35.00
maker-tulip_contig_226_pilon_pilon-augustus-gene-0.48-mRNA-1	0.00	0.00	0.00	38.00	27.00	54.00	61.00	65.00	41.00	0.00	0.00	0.00	459.00	51.00	187.00	0.00	1.00	0.00
augustus_masked-tulip_contig_715_pilon_pilon-processed-gene-5.9-mRNA-1	0.00	5.58	17.78	0.00	5.01	0.00	0.93	0.00	0.00	0.00	5.96	1.47	3.57	0.00	0.00	0.00	0.00	13.33
maker-tulip_contig_828_pilon_pilon-augustus-gene-0.2-mRNA-1	7.00	3.00	5.00	12.00	15.00	6.00	15.00	11.00	8.00	32.00	16.00	29.00	54.00	7.00	33.00	17.00	3.00	18.00
augustus_masked-tulip_contig_553_pilon_pilon-processed-gene-0.35-mRNA-1	0.00	0.00	0.00	0.00	0.00	0.00	0.00	0.00	0.00	0.00	0.00	0.00	1.00	0.00	0.00	0.00	0.00	0.00
maker-tulip_contig_327_pilon_pilon-augustus-gene-0.10-mRNA-1	2856.00	2424.00	2772.00	674.00	326.00	347.00	348.00	840.00	324.00	421.00	386.00	584.00	1026.00	154.00	525.00	720.00	215.00	410.00
maker-tulip_contig_407_pilon_pilon-augustus-gene-0.70-mRNA-1	1.00	0.00	1.00	249.00	286.00	289.00	40.00	32.00	18.00	19.00	16.00	13.00	13.00	1.00	13.00	38.00	11.00	33.00
maker-tulip_contig_88_pilon_pilon-augustus-gene-0.75-mRNA-1	0.00	0.00	0.00	0.00	0.00	0.00	0.00	0.00	0.00	0.00	0.00	0.00	0.00	0.00	0.00	0.00	0.00	0.00
maker-tulip_contig_699_pilon_pilon-augustus-gene-0.9-mRNA-1	0.00	0.00	0.00	0.00	0.00	0.00	0.00	0.00	0.00	0.00	0.00	0.00	0.00	0.00	0.00	0.00	0.00	0.00
maker-tulip_contig_37_pilon_pilon-augustus-gene-2.34-mRNA-1	1.50	0.00	0.00	0.00	0.00	0.00	0.00	0.00	0.50	0.50	0.00	0.00	0.00	0.00	0.00	0.00	0.50	0.50
maker-tulip_contig_102_pilon_pilon-augustus-gene-0.53-mRNA-1	592.00	337.00	493.00	9.00	16.00	16.00	7.00	7.00	9.00	8.00	8.00	9.00	38.00	2.00	19.00	12.00	6.00	8.00
maker-tulip_contig_47_pilon_pilon-augustus-gene-0.67-mRNA-1	0.00	0.00	0.00	0.00	0.00	0.00	0.00	0.00	0.00	0.00	0.00	2.00	0.00	0.00	0.00	1.00	0.00	0.00
maker-tulip_contig_236_pilon_pilon-augustus-gene-2.4-mRNA-1	2.00	0.00	1.00	603.00	707.00	574.00	56.00	53.00	58.00	20.00	19.00	32.00	44.00	5.00	34.00	47.00	17.00	23.00
maker-tulip_contig_307_pilon_pilon-augustus-gene-1.66-mRNA-1	2869.00	2027.00	2558.00	553.00	713.00	660.00	1163.00	1135.00	762.00	570.00	456.00	510.00	2970.00	412.00	1823.00	209.00	97.00	200.00
maker-tulip_contig_598_pilon_pilon-augustus-gene-0.87-mRNA-1	1402.00	1234.00	1359.00	416.00	517.00	591.00	466.00	493.00	299.00	541.00	514.00	547.00	1196.00	153.00	845.00	693.00	231.00	690.00
maker-tulip_contig_318_pilon_pilon-augustus-gene-0.53-mRNA-1	5031.00	3246.00	3990.00	3195.00	3617.00	3282.00	2840.00	2335.00	1902.00	5799.00	4387.00	5828.00	9740.00	1355.00	5509.00	2711.00	1019.00	2704.00
maker-tulip_contig_407_pilon_pilon-augustus-gene-7.101-mRNA-1	1043.00	872.00	873.00	203.00	229.00	247.00	213.00	189.00	137.00	441.00	361.00	383.00	959.00	117.00	671.00	247.00	88.00	177.00
maker-tulip_contig_800_pilon_pilon-augustus-gene-1.24-mRNA-1	0.00	0.00	0.00	0.00	0.00	0.00	0.00	0.00	0.00	0.00	0.00	0.00	0.00	0.00	0.00	0.00	0.00	0.00
maker-tulip_contig_837_pilon_pilon-augustus-gene-8.59-mRNA-1	0.00	0.00	0.00	370.00	523.00	421.00	43.00	34.00	26.00	5.00	11.00	14.00	17.00	3.00	10.00	18.00	16.00	19.00
augustus_masked-tulip_contig_597_pilon_pilon-processed-gene-5.43-mRNA-1	0.00	0.00	6.00	2.00	4.00	0.67	1.00	1.00	0.00	0.00	1.00	0.00	0.00	0.00	0.00	0.00	0.00	0.00
augustus_masked-tulip_contig_112_pilon_pilon-processed-gene-3.3-mRNA-1	0.00	0.00	2.00	0.00	0.00	0.00	1.00	0.00	0.00	1.00	0.00	1.00	1.00	0.00	1.00	0.00	0.00	0.00
augustus_masked-tulip_contig_247_pilon_pilon-processed-gene-2.199-mRNA-1	0.00	0.00	0.00	0.00	0.00	1.00	6.00	0.00	4.00	1.00	0.00	0.00	0.00	0.00	0.00	0.00	0.00	0.00
maker-tulip_contig_125_pilon_pilon-augustus-gene-0.326-mRNA-1	0.00	0.00	0.00	99.00	201.00	90.00	151.00	195.00	39.00	6.00	5.00	1.00	0.00	0.00	0.00	2.00	0.00	0.00
maker-tulip_contig_429_pilon_pilon-augustus-gene-1.4-mRNA-1	3.00	0.00	1.00	27.00	34.00	35.00	29.00	8.00	30.00	20.00	17.00	19.00	38.00	5.00	37.00	10.00	13.00	31.00
augustus_masked-tulip_contig_234_pilon_pilon-processed-gene-3.14-mRNA-1	0.00	0.00	0.00	0.00	0.00	0.00	0.00	0.00	0.00	0.00	0.00	0.00	0.00	0.00	0.00	0.00	0.00	0.00
maker-tulip_contig_691_pilon_pilon-augustus-gene-1.8-mRNA-1	1.00	0.00	0.00	7.00	0.00	0.00	0.00	0.00	0.00	1.00	0.00	0.00	0.00	0.00	0.00	0.00	1.00	2.00
maker-tulip_contig_270_pilon_pilon-augustus-gene-2.80-mRNA-1	0.00	3.00	2.00	92.00	77.00	64.00	5.00	2.00	4.00	6.00	3.00	7.00	7.00	1.00	1.00	11.00	5.00	15.00
augustus_masked-tulip_contig_368_pilon_pilon-processed-gene-0.21-mRNA-1	0.00	0.00	0.00	0.00	0.00	0.00	0.00	0.00	0.00	0.00	0.00	0.00	0.00	0.00	0.00	0.00	0.00	0.00
maker-tulip_contig_555_pilon_pilon-augustus-gene-2.19-mRNA-1	9.00	9.00	6.00	8.00	13.00	7.00	3.00	1.00	1.00	12.00	3.00	5.00	6.00	0.00	6.00	32.00	21.00	42.00
maker-tulip_contig_845_pilon_pilon-augustus-gene-0.35-mRNA-1	0.00	0.00	1.00	0.00	0.00	1.00	1.00	0.00	0.00	0.00	0.00	0.00	0.00	0.00	0.00	0.00	0.00	0.00
maker-tulip_contig_199_pilon_pilon-augustus-gene-1.0-mRNA-1	2.00	6.00	2.00	30.00	30.00	25.00	9.00	12.00	5.00	42.00	31.00	30.00	43.00	3.00	20.00	25.00	9.00	13.00
augustus_masked-tulip_contig_196_pilon_pilon-processed-gene-3.4-mRNA-1	549.00	180.00	504.00	788.00	1187.00	778.00	60.00	59.00	56.00	95.00	96.00	125.00	281.00	37.00	156.00	2.00	0.00	1.00
maker-tulip_contig_711_pilon_pilon-augustus-gene-2.65-mRNA-1	38.00	39.00	36.00	3041.00	2194.00	3156.00	3896.00	4165.00	2645.00	356.00	356.00	330.00	389.00	47.00	243.00	429.00	144.00	351.00
augustus_masked-tulip_contig_75_pilon_pilon-processed-gene-1.39-mRNA-1	0.00	0.00	0.00	0.00	0.00	0.00	1.00	0.00	0.00	0.00	0.00	0.00	0.00	0.00	0.00	0.00	0.00	0.00
maker-tulip_contig_687_pilon_pilon-augustus-gene-0.61-mRNA-1	15477.00	15488.00	15384.00	6691.00	7318.00	7388.00	8817.00	10199.00	5291.00	5870.00	4231.00	4184.00	5954.00	817.00	4143.00	2323.00	894.00	2047.00
maker-tulip_contig_468_pilon_pilon-augustus-gene-3.72-mRNA-1	153.16	59.39	87.67	100.97	119.18	119.39	80.80	128.29	90.00	94.32	87.86	112.80	175.47	29.49	127.62	124.91	37.35	113.17
maker-tulip_contig_59_pilon_pilon-augustus-gene-1.48-mRNA-1	457.00	450.00	447.00	453.00	751.00	630.00	455.00	604.00	262.00	192.00	169.00	166.00	703.00	95.00	470.00	239.00	70.00	205.00
maker-tulip_contig_47_pilon_pilon-augustus-gene-0.50-mRNA-1	525.00	809.00	359.00	625.00	470.00	662.00	211.00	212.00	133.00	77.00	66.00	46.00	1532.00	216.00	1256.00	145.00	56.00	125.00
maker-tulip_contig_334_pilon_pilon-augustus-gene-4.43-mRNA-1	37.00	14.00	31.00	88.00	116.00	110.00	121.00	144.00	88.00	109.00	67.00	73.00	160.00	20.00	95.00	24.00	12.00	34.00
maker-tulip_contig_39_pilon_pilon-augustus-gene-1.71-mRNA-1	804.00	597.00	1183.00	91.00	59.00	59.00	584.00	389.00	386.00	5704.00	4891.00	4914.00	170.00	10.00	57.00	739.00	261.00	461.00
maker-tulip_contig_196_pilon_pilon-augustus-gene-5.56-mRNA-1	2063.00	771.00	1541.00	2023.00	2016.00	2283.00	2486.00	2634.00	1867.00	114.00	31.00	76.00	1343.00	192.00	920.00	132.00	33.00	105.00
augustus_masked-tulip_contig_149_pilon_pilon-processed-gene-0.38-mRNA-1	422.00	502.00	415.00	162.00	200.00	181.00	157.00	146.00	134.00	263.00	241.00	231.00	907.00	111.00	607.00	171.00	108.00	254.00
augustus_masked-tulip_contig_738_pilon_pilon-processed-gene-1.5-mRNA-1	0.36	0.00	0.00	0.00	0.00	1.24	0.00	0.00	0.00	0.00	0.00	0.00	0.00	0.00	0.00	0.00	0.00	0.00
augustus_masked-tulip_contig_773_pilon_pilon-processed-gene-0.4-mRNA-1	2.00	1.00	0.00	276.00	380.00	326.00	243.00	319.00	126.00	13.00	9.00	9.00	78.00	6.00	53.00	75.00	28.00	62.00
augustus_masked-tulip_contig_446_pilon_pilon-processed-gene-0.25-mRNA-1	0.00	0.00	0.00	0.00	0.00	0.00	0.00	0.00	0.00	1.00	0.00	0.00	0.00	0.00	0.00	0.00	0.00	0.00
maker-tulip_contig_799_pilon_pilon-augustus-gene-0.69-mRNA-1	5.00	45.00	7.00	1151.58	1098.00	1257.00	1837.00	1415.00	1440.00	60.00	75.00	80.00	1182.00	110.00	418.00	771.00	220.00	679.00
augustus_masked-tulip_contig_555_pilon_pilon-processed-gene-2.97-mRNA-1	0.00	1.82	3.26	2.13	9.30	3.13	0.00	0.00	0.00	1.64	1.83	11.32	47.69	11.86	37.22	0.00	0.00	8.45
maker-tulip_contig_507_pilon_pilon-augustus-gene-0.49-mRNA-1	735.00	719.00	702.00	442.00	454.00	466.00	445.00	434.00	309.00	508.00	489.00	545.00	916.00	119.00	546.00	396.00	183.00	489.00
maker-tulip_contig_586_pilon_pilon-augustus-gene-0.0-mRNA-1	12.00	1.00	5.00	0.00	0.00	0.00	0.00	0.00	0.00	0.00	3.00	0.00	14.00	3.00	12.00	63.00	27.00	39.00
maker-tulip_contig_703_pilon_pilon-augustus-gene-0.0-mRNA-1	285.00	188.00	260.00	166.00	174.00	172.00	94.00	64.00	55.00	281.00	198.00	268.00	413.00	50.00	246.00	77.00	25.00	66.00
maker-tulip_contig_800_pilon_pilon-augustus-gene-1.67-mRNA-1	721.00	357.00	748.00	3353.00	3416.00	3586.00	4984.00	3309.00	2916.00	1248.00	895.00	1156.00	4907.00	612.00	2774.00	2192.00	771.00	2483.00
augustus_masked-tulip_contig_859_pilon_pilon-processed-gene-0.73-mRNA-1	0.00	1.00	1.00	0.00	0.00	1.00	0.00	0.00	0.00	2.00	0.00	0.00	1.00	0.00	1.00	0.00	0.00	0.00
augustus_masked-tulip_contig_605_pilon_pilon-processed-gene-0.25-mRNA-1	0.00	0.00	0.00	0.00	0.00	0.00	0.00	0.00	0.00	0.00	0.00	0.00	0.00	0.00	0.00	0.00	0.00	0.00
maker-tulip_contig_278_pilon_pilon-augustus-gene-0.73-mRNA-1	0.00	0.00	0.00	54.00	38.00	112.00	761.00	740.00	499.00	7.00	6.00	3.00	112.00	17.00	43.00	119.00	42.00	108.00
augustus_masked-tulip_contig_248_pilon_pilon-processed-gene-0.5-mRNA-1	43.00	17.00	43.00	76.00	31.00	52.00	77.00	47.00	39.00	163.00	99.00	134.00	129.00	20.00	66.00	56.00	29.00	76.00
augustus_masked-tulip_contig_327_pilon_pilon-processed-gene-9.55-mRNA-1	0.00	0.00	0.00	0.00	4.00	1.00	2.00	2.00	1.00	0.00	0.00	0.00	0.00	0.00	0.00	1.00	0.00	0.00
augustus_masked-tulip_contig_90_pilon_pilon-processed-gene-0.6-mRNA-1	52.00	14.00	18.00	254.00	245.00	240.00	173.00	165.00	108.00	272.00	173.00	242.00	363.00	32.00	140.00	246.00	85.00	236.00
maker-tulip_contig_773_pilon_pilon-augustus-gene-2.56-mRNA-1	0.00	0.00	0.00	1.00	1.00	0.00	0.00	4.01	0.00	0.00	0.00	0.00	0.00	0.00	0.00	0.00	0.00	0.00
maker-tulip_contig_530_pilon_pilon-augustus-gene-0.48-mRNA-1	892.00	683.00	861.00	189.00	246.00	203.00	212.00	280.00	181.00	504.00	373.00	454.00	577.00	84.00	345.00	159.00	74.00	174.00
maker-tulip_contig_815_pilon_pilon-augustus-gene-0.2-mRNA-1	3.00	4.00	7.00	156.00	162.00	189.00	233.00	194.00	154.00	264.00	196.00	249.00	84.00	5.00	69.00	107.00	35.00	91.00
maker-tulip_contig_187_pilon_pilon-augustus-gene-1.90-mRNA-1	632.00	340.00	477.00	250.00	223.00	267.00	95.00	122.00	75.00	118.00	124.00	110.00	740.00	95.00	417.00	254.00	118.00	277.00
augustus_masked-tulip_contig_628_pilon_pilon-processed-gene-0.58-mRNA-1	0.00	0.00	2.00	0.00	21.02	71.78	366.37	456.72	94.15	0.00	0.00	0.00	11.00	0.00	0.00	1.38	0.00	18.34
augustus_masked-tulip_contig_242_pilon_pilon-processed-gene-0.2-mRNA-1	0.00	1.75	0.00	0.51	0.00	1.00	1.00	0.00	0.00	0.00	0.00	1.24	0.00	0.00	0.00	0.00	1.89	0.00
maker-tulip_contig_177_pilon_pilon-augustus-gene-0.18-mRNA-1	8.00	4.00	2.00	0.00	1.00	1.00	2.00	3.00	4.00	13.00	8.00	16.00	9.00	1.00	5.00	6.00	4.00	6.00
maker-tulip_contig_236_pilon_pilon-augustus-gene-0.47-mRNA-1	1066.00	1186.00	1281.00	95.00	454.00	157.00	347.00	391.00	263.00	638.00	471.00	580.00	1761.00	211.00	1144.00	116.00	78.00	146.00
maker-tulip_contig_523_pilon_pilon-augustus-gene-0.110-mRNA-1	70.00	54.00	91.00	380.00	357.00	454.00	358.00	402.00	234.00	190.00	164.00	215.00	607.00	69.00	366.00	231.00	103.00	236.00
maker-tulip_contig_400_pilon_pilon-augustus-gene-0.6-mRNA-1	925.00	856.00	917.00	432.00	495.00	468.00	397.00	371.00	332.00	634.00	531.00	624.00	1062.00	146.00	729.00	376.00	236.00	429.00
maker-tulip_contig_75_pilon_pilon-augustus-gene-0.27-mRNA-1	516.00	437.00	502.00	310.00	326.00	321.00	238.00	226.00	184.00	355.00	340.00	329.00	639.00	76.00	420.00	406.00	131.00	348.00
maker-tulip_contig_474_pilon_pilon-augustus-gene-0.0-mRNA-1	2278.00	1199.00	2326.00	1967.00	2190.00	2148.00	3274.00	3073.00	2207.00	1820.00	1386.00	1665.00	3017.00	395.00	1874.00	380.00	219.00	452.00
maker-tulip_contig_773_pilon_pilon-augustus-gene-2.42-mRNA-1	3.00	0.00	0.00	13.00	0.00	4.00	2.00	2.00	0.00	1.00	0.00	1.00	10.00	2.00	15.00	33.00	9.00	31.00
maker-tulip_contig_711_pilon_pilon-augustus-gene-0.25-mRNA-1	721.00	724.00	831.00	225.00	212.00	239.00	214.00	233.00	134.00	362.00	261.00	254.00	554.00	78.00	315.00	201.00	70.00	158.00
augustus_masked-tulip_contig_409_pilon_pilon-processed-gene-0.2-mRNA-1	0.00	0.00	0.00	4.00	4.00	14.00	0.00	1.00	0.00	0.00	0.00	2.00	0.00	1.00	0.00	1.00	2.00	0.00
maker-tulip_contig_490_pilon_pilon-augustus-gene-1.47-mRNA-1	0.00	0.00	0.00	50.00	38.00	32.00	192.00	126.00	151.00	10.00	7.00	6.00	1.00	0.00	0.00	0.00	0.00	0.00
augustus_masked-tulip_contig_604_pilon_pilon-processed-gene-3.21-mRNA-1	0.00	0.00	0.00	0.00	0.00	0.00	0.00	0.00	0.00	0.00	0.00	0.00	0.00	0.00	1.00	0.00	0.00	0.00
augustus_masked-tulip_contig_818_pilon_pilon-processed-gene-0.22-mRNA-1	63.00	24.74	21.22	134.23	82.23	98.17	62.63	34.54	29.93	104.01	96.43	87.18	118.38	22.42	83.97	130.92	33.93	171.59
maker-tulip_contig_667_pilon_pilon-augustus-gene-0.64-mRNA-1	2.00	5.00	11.00	142.00	168.00	179.00	192.00	208.00	137.00	7.00	5.00	4.00	39.00	6.00	25.00	54.00	22.00	47.00
maker-tulip_contig_271_pilon_pilon-augustus-gene-1.20-mRNA-1	0.00	0.00	1.33	0.00	0.00	0.00	0.00	0.00	0.00	0.00	0.00	0.00	0.00	0.00	0.00	0.00	0.00	0.00
maker-tulip_contig_586_pilon_pilon-augustus-gene-8.2-mRNA-1	0.00	0.00	0.00	0.00	0.00	0.00	0.00	0.00	0.00	0.00	0.00	0.00	0.00	0.00	0.00	0.00	0.00	0.00
augustus_masked-tulip_contig_722_pilon_pilon-processed-gene-0.14-mRNA-1	0.00	0.00	0.00	0.00	0.00	0.00	0.00	0.00	0.00	0.00	0.00	0.00	13.00	3.00	2.00	0.00	0.00	0.00
maker-tulip_contig_39_pilon_pilon-augustus-gene-1.70-mRNA-1	0.00	0.00	0.00	0.00	0.00	0.00	5.00	14.00	2.00	0.00	0.00	0.00	0.00	0.00	0.00	0.00	0.00	0.00
maker-tulip_contig_27_pilon_pilon-augustus-gene-0.8-mRNA-1	0.00	0.00	0.00	2.00	6.00	9.00	13.54	5.00	16.00	2.00	0.00	1.00	29.00	11.00	11.00	23.00	6.00	46.00
maker-tulip_contig_687_pilon_pilon-augustus-gene-0.15-mRNA-1	0.00	0.00	0.00	4.00	11.00	6.00	19.00	9.00	14.00	17.00	15.00	22.00	33.00	3.00	16.00	32.00	5.00	25.00
maker-tulip_contig_43_pilon_pilon-augustus-gene-3.9-mRNA-1	630.00	578.00	640.00	138.00	149.00	146.00	182.00	204.00	150.00	522.00	506.00	539.00	624.00	81.00	444.00	94.00	34.00	80.00
maker-tulip_contig_702_pilon_pilon-augustus-gene-0.95-mRNA-1	486.00	559.00	626.00	51.00	64.00	59.00	50.00	69.00	74.00	110.00	111.00	136.00	453.00	71.00	402.00	23.00	8.00	19.00
maker-tulip_contig_507_pilon_pilon-augustus-gene-1.32-mRNA-1	639.00	602.00	788.00	341.00	365.00	384.00	228.00	262.00	141.00	482.00	424.00	458.00	1239.00	135.00	719.00	205.00	75.00	204.00
maker-tulip_contig_211_pilon_pilon-augustus-gene-3.15-mRNA-1	87.00	101.00	129.00	104.00	104.00	135.00	89.00	100.00	91.00	197.00	134.00	160.00	306.00	48.00	184.00	103.00	29.00	85.00
augustus_masked-tulip_contig_406_pilon_pilon-processed-gene-0.10-mRNA-1	0.58	4.93	7.42	0.62	11.94	0.02	0.01	0.00	3.84	0.00	9.02	4.80	1.15	0.15	0.13	0.00	0.00	0.61
maker-tulip_contig_455_pilon_pilon-augustus-gene-1.24-mRNA-1	2114.00	2397.00	2578.00	433.00	413.00	405.00	267.00	204.00	202.00	847.00	731.00	886.00	2311.00	273.00	1710.00	604.00	194.00	582.00
augustus_masked-tulip_contig_272_pilon_pilon-processed-gene-4.85-mRNA-1	2.00	4.00	0.00	8.00	5.00	5.00	1.00	0.00	0.00	3.00	2.00	1.00	9.00	1.00	5.00	395.00	289.00	438.00
maker-tulip_contig_537_pilon_pilon-augustus-gene-2.33-mRNA-1	50.00	57.00	54.00	6371.00	5040.00	6513.00	5672.00	4188.00	3102.00	2704.00	2383.00	3097.00	10413.00	891.00	5058.00	10502.00	2417.00	8114.00
maker-tulip_contig_209_pilon_pilon-augustus-gene-2.38-mRNA-1	32.94	51.11	40.88	3.65	9.57	6.82	3.46	1.73	4.36	2.15	1.62	1.89	8.41	2.08	1.75	0.00	0.00	0.00
augustus_masked-tulip_contig_229_pilon_pilon-processed-gene-0.4-mRNA-1	1.00	8.00	10.00	13.00	10.00	8.00	22.00	10.00	6.00	28.00	12.00	21.00	56.00	4.00	27.00	7.00	3.00	25.00
augustus_masked-tulip_contig_831_pilon_pilon-processed-gene-0.20-mRNA-1	137.00	7.00	9.00	0.00	0.00	0.00	0.00	0.00	0.00	0.00	0.00	0.00	0.00	0.00	0.00	0.00	0.00	0.00
maker-tulip_contig_275_pilon_pilon-augustus-gene-0.5-mRNA-1	9.00	14.00	10.00	31.00	37.00	33.00	48.00	75.00	35.00	362.00	490.00	463.00	207.00	16.00	118.00	306.00	118.00	335.00
maker-tulip_contig_684_pilon_pilon-augustus-gene-0.69-mRNA-1	289.00	210.00	252.00	864.00	711.00	803.00	502.00	485.00	349.00	859.00	655.00	741.00	2028.00	300.00	1306.00	951.00	399.00	1208.00
maker-tulip_contig_345_pilon_pilon-augustus-gene-4.6-mRNA-1	0.00	0.00	0.00	0.00	0.00	0.00	0.00	3.00	0.00	0.00	0.00	0.00	4.00	0.00	1.00	1.00	0.00	1.00
augustus_masked-tulip_contig_553_pilon_pilon-processed-gene-0.40-mRNA-1	0.00	0.00	0.00	1.00	2.00	0.00	0.00	0.00	0.00	0.00	0.00	0.00	1.00	0.00	8.00	0.00	0.00	1.00
augustus_masked-tulip_contig_126_pilon_pilon-processed-gene-2.249-mRNA-1	51.00	129.00	30.00	0.00	0.00	0.00	0.00	0.00	0.00	1.00	0.00	0.00	298.00	44.00	200.00	0.00	0.00	0.00
maker-tulip_contig_58_pilon_pilon-augustus-gene-0.27-mRNA-1	176.00	160.00	224.00	195.00	148.00	184.00	116.00	106.00	86.00	250.00	218.00	233.00	554.00	81.00	301.00	120.00	55.00	129.00
maker-tulip_contig_3_pilon_pilon-augustus-gene-0.0-mRNA-1	3.00	9.00	10.00	57.00	84.00	92.00	41.00	25.00	23.00	68.00	36.00	51.00	258.00	31.00	90.00	150.00	37.00	150.00
augustus_masked-tulip_contig_121_pilon_pilon-processed-gene-0.61-mRNA-1	49.00	32.00	59.00	165.00	133.00	147.00	193.00	91.00	88.00	458.00	386.00	519.00	1677.00	300.00	814.00	1248.00	352.00	996.00
augustus_masked-tulip_contig_208_pilon_pilon-processed-gene-0.5-mRNA-1	0.00	0.00	0.00	0.00	0.00	0.00	0.00	0.00	0.00	0.00	0.00	0.00	0.00	0.00	1.00	0.00	0.00	0.00
maker-tulip_contig_3_pilon_pilon-augustus-gene-6.13-mRNA-1	587.00	727.00	587.00	1439.00	1621.00	1366.00	552.00	596.00	459.00	724.00	661.00	747.00	1248.00	139.00	745.00	791.00	302.00	960.00
maker-tulip_contig_125_pilon_pilon-augustus-gene-0.89-mRNA-1	1.00	0.00	0.00	1.00	1.00	1.00	14.99	55.20	14.00	0.00	0.00	0.00	0.00	0.00	0.00	0.00	0.00	0.00
maker-tulip_contig_698_pilon_pilon-augustus-gene-0.20-mRNA-1	0.00	0.00	0.00	0.00	0.00	2.00	0.00	0.00	0.00	1.00	0.00	0.00	0.00	0.00	0.00	0.00	1.00	0.00
augustus_masked-tulip_contig_473_pilon_pilon-processed-gene-2.32-mRNA-1	1.00	2.00	0.00	0.00	0.00	0.00	0.00	0.00	0.00	0.00	0.00	0.00	0.00	0.00	0.00	0.00	0.00	0.00
augustus_masked-tulip_contig_3_pilon_pilon-processed-gene-0.59-mRNA-1	13.00	10.00	19.00	1.00	2.00	1.00	1.00	3.00	0.00	2.00	2.00	3.00	2.00	1.00	2.00	1.00	0.00	0.00
augustus_masked-tulip_contig_80_pilon_pilon-processed-gene-0.16-mRNA-1	107.86	101.81	107.01	31.66	26.52	36.95	14.51	8.00	14.00	31.27	40.36	46.89	30.38	2.00	12.00	23.16	19.91	29.87
maker-tulip_contig_121_pilon_pilon-augustus-gene-4.33-mRNA-1	0.00	0.00	0.00	23.00	29.00	23.00	72.00	32.00	20.00	0.00	0.00	0.00	34.00	3.00	13.00	57.00	2.00	15.00
maker-tulip_contig_666_pilon_pilon-augustus-gene-0.15-mRNA-1	16.00	13.00	6.00	329.00	342.00	298.00	306.00	221.00	260.00	342.00	216.00	262.00	371.00	50.00	182.00	208.00	75.00	232.00
maker-tulip_contig_372_pilon_pilon-augustus-gene-1.109-mRNA-1	26.00	12.00	39.00	343.00	348.00	313.00	115.00	83.00	62.00	209.00	163.00	195.00	434.00	75.00	225.00	197.00	69.00	223.00
maker-tulip_contig_860_pilon_pilon-augustus-gene-7.23-mRNA-1	0.00	0.00	4.00	0.00	0.00	0.00	1.00	0.00	0.00	0.00	0.00	1.00	2.00	0.00	3.00	1.00	0.00	1.00
maker-tulip_contig_674_pilon_pilon-augustus-gene-8.58-mRNA-1	0.00	0.00	0.00	0.00	0.00	0.00	0.00	0.00	0.00	0.00	0.00	0.00	0.00	0.00	0.00	0.00	0.00	0.00
maker-tulip_contig_80_pilon_pilon-augustus-gene-0.80-mRNA-1	61.63	70.61	59.12	24.63	15.09	0.99	0.00	0.00	0.00	569.23	173.89	89.20	1269.03	116.26	550.00	823.64	135.85	315.16
maker-tulip_contig_169_pilon_pilon-augustus-gene-0.16-mRNA-1	60.00	16.00	52.00	125.00	126.00	128.00	120.00	101.00	68.00	314.00	232.00	250.00	452.00	58.00	246.00	247.00	69.00	207.00
maker-tulip_contig_841_pilon_pilon-augustus-gene-0.87-mRNA-1	372.00	272.00	332.00	178.00	193.00	207.00	144.00	105.00	100.00	213.00	204.00	237.00	532.00	77.00	343.00	121.00	44.00	113.00
maker-tulip_contig_416_pilon_pilon-augustus-gene-0.21-mRNA-1	0.00	0.00	0.00	0.00	0.00	0.00	0.00	0.00	0.00	0.00	0.00	0.00	0.00	0.00	1.00	698.00	388.00	735.00
augustus_masked-tulip_contig_387_pilon_pilon-processed-gene-1.1-mRNA-1	0.00	0.00	0.00	0.00	0.00	0.00	0.00	0.00	0.00	0.00	0.00	0.00	0.00	0.00	0.00	0.00	0.00	0.00
augustus_masked-tulip_contig_623_pilon_pilon-processed-gene-5.6-mRNA-1	0.00	0.00	0.00	1.00	15.00	13.00	2.00	22.00	1.00	5.00	0.00	6.00	0.00	0.00	0.00	0.00	0.00	0.00
maker-tulip_contig_527_pilon_pilon-augustus-gene-3.9-mRNA-1	0.00	0.00	0.00	5.00	6.00	5.00	94.00	27.00	341.00	546.00	337.00	439.00	717.00	118.00	797.00	715.00	249.00	612.00
augustus_masked-tulip_contig_33_pilon_pilon-processed-gene-5.24-mRNA-1	0.00	0.00	0.00	9.00	12.00	4.00	1.00	1.00	0.00	2.00	0.00	1.00	10.00	1.00	2.00	6.00	1.00	10.00
augustus_masked-tulip_contig_1_pilon_pilon-processed-gene-3.75-mRNA-1	0.00	5.00	0.00	0.00	2.00	0.00	0.00	2.00	0.00	0.00	0.00	0.00	1.00	0.00	3.00	3.00	2.00	4.00
maker-tulip_contig_282_pilon_pilon-augustus-gene-0.7-mRNA-1	0.00	0.00	0.00	1872.00	1908.00	1603.00	156.00	119.00	131.00	38.00	36.00	37.00	83.00	11.00	53.00	109.00	50.00	59.00
augustus_masked-tulip_contig_109_pilon_pilon-processed-gene-1.81-mRNA-1	0.00	0.00	0.00	0.00	0.00	0.00	0.00	0.00	0.00	1.00	0.00	1.00	0.00	0.00	1.00	0.00	0.00	0.00
augustus_masked-tulip_contig_217_pilon_pilon-processed-gene-3.66-mRNA-1	597.00	618.00	623.00	62.00	76.00	68.00	87.00	76.00	54.00	198.00	108.00	167.00	631.00	73.00	418.00	13.00	6.00	23.00
maker-tulip_contig_75_pilon_pilon-augustus-gene-1.28-mRNA-1	8.00	5.00	7.00	21.00	27.00	24.00	14.00	16.00	9.00	10.00	9.00	11.00	40.00	6.00	26.00	14.00	3.00	11.00
maker-tulip_contig_199_pilon_pilon-augustus-gene-1.36-mRNA-1	78.00	198.00	63.00	298.00	272.00	251.00	103.00	67.00	79.00	453.00	415.00	483.00	585.00	82.00	309.00	112.00	46.00	113.00
maker-tulip_contig_361_pilon_pilon-augustus-gene-0.0-mRNA-1	626.00	293.00	399.00	283.00	198.00	233.00	184.00	142.00	122.00	124.00	85.00	96.00	209.00	23.00	108.00	195.00	94.00	225.00
augustus_masked-tulip_contig_81_pilon_pilon-processed-gene-0.15-mRNA-1	24.03	122.72	33.50	8.15	12.25	6.08	19.02	18.99	5.34	32.78	10.93	17.63	5.83	8.99	13.25	4.43	3.42	3.84
maker-tulip_contig_862_pilon_pilon-augustus-gene-1.55-mRNA-1	36.14	37.59	45.62	63.24	37.93	31.94	18.84	33.50	23.49	34.96	35.35	39.98	58.59	6.32	36.40	28.66	11.35	31.02
maker-tulip_contig_283_pilon_pilon-augustus-gene-0.1-mRNA-1	0.00	0.00	0.00	0.00	7.00	1.00	1.00	0.00	1.00	7.00	0.00	5.00	1.00	0.00	6.00	2.00	1.00	2.00
maker-tulip_contig_587_pilon_pilon-augustus-gene-0.1-mRNA-1	0.00	0.00	0.00	36.00	28.00	15.00	3.00	1.00	5.00	1.00	1.00	0.00	0.00	0.00	0.00	3.00	0.00	1.00
maker-tulip_contig_196_pilon_pilon-augustus-gene-5.54-mRNA-1	703.00	311.00	547.00	128.00	283.00	117.00	292.00	597.00	253.00	201.00	164.00	109.00	204.00	42.00	413.00	646.00	397.00	929.00
maker-tulip_contig_204_pilon_pilon-augustus-gene-1.26-mRNA-1	14.00	8.00	21.00	83.00	91.00	80.00	24.00	20.00	10.00	30.00	21.00	40.00	29.00	2.00	18.00	44.00	29.00	53.00
maker-tulip_contig_78_pilon_pilon-augustus-gene-0.41-mRNA-1	0.00	0.00	0.00	1.00	0.00	0.00	4.00	0.00	0.00	1.00	0.00	1.00	2.00	0.00	0.00	0.00	1.00	1.00
augustus_masked-tulip_contig_741_pilon_pilon-processed-gene-0.38-mRNA-1	1.00	0.00	1.00	4.00	10.00	12.00	8.00	22.00	7.00	100.00	61.00	80.00	28.00	3.00	23.00	46.00	16.00	23.00
augustus_masked-tulip_contig_323_pilon_pilon-processed-gene-5.14-mRNA-1	33.00	32.00	20.00	290.00	262.00	290.00	160.00	131.00	89.00	185.00	135.00	181.00	202.00	24.00	138.00	116.00	45.00	139.00
maker-tulip_contig_301_pilon_pilon-augustus-gene-0.10-mRNA-1	0.00	0.00	0.00	0.00	1.00	0.00	0.00	1.00	0.00	0.00	0.00	0.00	5.00	1.00	3.00	2.00	1.00	1.00
augustus_masked-tulip_contig_654_pilon_pilon-processed-gene-0.1-mRNA-1	0.00	0.00	0.00	0.00	0.00	0.00	5.00	0.00	3.00	0.00	0.00	0.00	328.00	50.00	147.00	236.00	67.39	137.00
maker-tulip_contig_307_pilon_pilon-augustus-gene-1.243-mRNA-1	65.00	47.00	71.00	51.00	64.00	46.00	28.00	32.00	30.00	164.00	104.00	119.00	170.00	16.00	103.00	58.00	27.00	43.00
maker-tulip_contig_870_pilon_pilon-augustus-gene-1.30-mRNA-1	1.00	1.00	1.00	0.00	3.00	3.00	2.00	1.00	1.00	2.00	0.00	1.00	11.00	2.00	3.00	1.00	0.00	0.00
maker-tulip_contig_307_pilon_pilon-augustus-gene-1.53-mRNA-1	57.00	46.00	62.00	110.00	119.00	100.00	79.00	89.00	52.00	92.00	67.00	54.00	379.00	57.00	209.00	109.00	31.00	80.00
maker-tulip_contig_583_pilon_pilon-augustus-gene-1.26-mRNA-1	0.00	0.00	0.00	0.00	0.00	0.00	0.00	0.00	0.00	0.00	0.00	0.00	0.00	0.00	0.00	10.00	8.00	8.00
maker-tulip_contig_448_pilon_pilon-augustus-gene-0.37-mRNA-1	2.00	2.00	3.00	2.00	2.00	0.00	0.00	0.00	0.00	4.00	1.00	5.00	5.00	0.00	9.00	14.00	11.00	11.00
maker-tulip_contig_123_pilon_pilon-augustus-gene-0.66-mRNA-1	197.00	135.00	153.00	221.00	266.00	244.00	274.00	326.00	163.00	38.00	36.00	47.00	235.00	33.00	143.00	126.00	70.00	127.00
maker-tulip_contig_77_pilon_pilon-augustus-gene-0.33-mRNA-1	31.00	25.00	34.00	43.00	43.00	43.00	40.00	22.00	12.00	36.00	27.00	37.00	61.00	14.00	45.00	24.00	16.00	31.00
augustus_masked-tulip_contig_623_pilon_pilon-processed-gene-2.2-mRNA-1	217.00	201.00	158.00	128.00	153.00	162.00	201.00	193.00	119.00	277.00	182.00	233.00	579.00	92.00	374.00	165.00	63.00	202.00
maker-tulip_contig_46_pilon_pilon-augustus-gene-2.17-mRNA-1	0.00	1.00	0.00	4.00	5.00	4.00	3.00	5.00	2.00	1.00	1.00	1.00	7.00	2.00	1.00	0.00	0.00	0.00
augustus_masked-tulip_contig_264_pilon_pilon-processed-gene-0.25-mRNA-1	0.00	7.00	4.00	4.00	6.00	6.00	7.00	2.00	2.00	4.00	1.00	4.00	12.00	2.00	8.00	3.00	1.00	3.00
augustus_masked-tulip_contig_176_pilon_pilon-processed-gene-0.16-mRNA-1	0.00	0.00	1.00	1.00	0.00	0.00	0.00	0.00	0.00	3.00	2.00	2.00	0.00	0.00	0.00	0.00	0.00	0.00
maker-tulip_contig_683_pilon_pilon-augustus-gene-0.4-mRNA-1	16.00	49.00	93.00	70.00	84.00	99.00	116.00	132.00	96.00	31.00	47.00	49.00	356.00	76.00	367.00	531.00	450.00	918.00
maker-tulip_contig_547_pilon_pilon-augustus-gene-4.1-mRNA-1	0.00	0.00	0.00	2.00	3.00	1.00	0.00	1.00	0.00	0.00	0.00	0.00	0.00	1.00	0.00	0.00	0.00	0.00
maker-tulip_contig_868_pilon_pilon-augustus-gene-0.1-mRNA-1	5.00	7.00	7.00	8.00	7.00	8.00	3.00	3.00	4.00	3.00	1.00	2.00	22.00	2.00	12.00	2.00	1.00	5.00
augustus_masked-tulip_contig_56_pilon_pilon-processed-gene-0.91-mRNA-1	0.00	0.00	0.00	0.00	1.70	0.00	0.00	0.00	0.45	0.00	0.00	0.00	0.00	0.00	0.00	0.00	0.00	0.00
augustus_masked-tulip_contig_504_pilon_pilon-processed-gene-2.55-mRNA-1	639.00	413.00	559.00	610.00	786.00	676.00	786.00	714.00	471.00	979.00	795.00	996.00	445.00	53.00	249.00	267.00	76.00	191.00
augustus_masked-tulip_contig_362_pilon_pilon-processed-gene-9.9-mRNA-1	7.00	4.00	5.00	5.00	4.00	6.00	10.00	1.00	3.00	13.00	12.00	10.00	72.00	4.00	41.00	53.00	29.00	52.00
augustus_masked-tulip_contig_698_pilon_pilon-processed-gene-4.9-mRNA-1	0.00	1.00	0.00	9.00	7.00	6.00	2.00	2.00	0.00	16.00	19.00	11.00	11.00	0.00	4.00	6.00	5.00	11.00
maker-tulip_contig_583_pilon_pilon-augustus-gene-0.22-mRNA-1	0.00	1.00	0.00	0.00	1.00	0.00	0.00	0.00	0.00	2.00	0.00	2.00	0.00	0.00	6.00	0.00	0.00	2.00
maker-tulip_contig_661_pilon_pilon-augustus-gene-1.44-mRNA-1	50.00	22.00	48.00	285.00	351.00	352.00	204.00	193.00	194.00	263.00	236.00	206.00	439.00	54.00	279.00	275.00	135.00	336.00
augustus_masked-tulip_contig_199_pilon_pilon-processed-gene-3.10-mRNA-1	39.00	40.00	30.00	45.00	65.00	46.00	58.00	66.00	43.00	11.00	10.00	8.00	52.00	8.00	42.00	12.00	6.00	8.00
maker-tulip_contig_745_pilon_pilon-augustus-gene-1.29-mRNA-1	111.00	72.00	62.00	23.00	29.00	22.00	25.00	17.00	9.00	39.00	28.00	42.00	78.00	22.00	61.00	18.00	3.00	15.00
maker-tulip_contig_72_pilon_pilon-augustus-gene-0.26-mRNA-1	908.63	807.02	828.79	280.31	276.97	292.78	362.99	347.45	282.01	867.71	591.83	760.62	1594.15	207.42	966.57	278.25	144.63	410.52
maker-tulip_contig_327_pilon_pilon-augustus-gene-4.12-mRNA-1	2392.00	2246.00	2499.00	1563.00	1078.00	1251.00	2430.00	2411.00	1662.00	1622.00	1502.00	1582.00	4581.00	511.00	2587.00	2578.00	952.00	3000.00
augustus_masked-tulip_contig_3_pilon_pilon-processed-gene-5.12-mRNA-1	0.00	0.00	0.00	3.00	2.00	0.00	12.00	6.00	2.00	0.00	0.00	0.00	0.00	0.00	0.00	72.00	45.00	98.00
maker-tulip_contig_498_pilon_pilon-augustus-gene-0.7-mRNA-1	0.00	0.00	0.00	1.00	1.00	0.00	1.00	2.00	0.00	6.00	1.00	3.00	7.00	2.00	8.00	0.00	0.00	1.00
augustus_masked-tulip_contig_560_pilon_pilon-processed-gene-1.17-mRNA-1	11.00	6.00	19.00	32.00	35.00	18.00	16.00	21.00	18.00	25.00	16.00	24.00	41.00	2.00	27.00	19.00	5.00	24.00
maker-tulip_contig_691_pilon_pilon-augustus-gene-4.42-mRNA-1	136.00	53.00	87.00	53.00	48.00	40.00	34.00	21.00	19.00	212.00	183.00	207.00	124.00	18.00	132.00	93.00	42.00	73.00
maker-tulip_contig_559_pilon_pilon-augustus-gene-1.16-mRNA-1	132.00	157.00	138.00	615.00	652.00	654.00	264.00	347.00	230.00	1981.00	1924.00	2175.00	1551.00	201.00	862.00	1084.00	435.00	1221.00
augustus_masked-tulip_contig_677_pilon_pilon-processed-gene-1.85-mRNA-1	16.00	17.00	10.00	55.00	46.00	31.00	34.00	22.00	27.00	81.00	55.00	62.00	112.00	18.00	60.00	28.00	17.00	38.00
maker-tulip_contig_584_pilon_pilon-augustus-gene-3.0-mRNA-1	1.00	0.00	0.00	327.00	402.00	320.00	115.00	114.00	79.00	31.00	23.00	24.00	74.00	10.00	50.00	58.00	22.00	83.00
maker-tulip_contig_661_pilon_pilon-augustus-gene-0.29-mRNA-1	1632.00	1680.00	1767.00	961.00	983.00	997.00	524.00	616.00	422.00	1032.00	912.00	1016.00	2479.00	287.00	1606.00	560.00	253.00	513.00
maker-tulip_contig_535_pilon_pilon-augustus-gene-0.1-mRNA-1	0.00	0.00	0.00	613.00	719.00	619.00	50.00	46.00	55.00	14.00	15.00	12.00	41.00	4.00	31.00	86.00	32.00	63.00
maker-tulip_contig_628_pilon_pilon-augustus-gene-0.4-mRNA-1	0.00	0.00	0.00	321.00	648.98	586.22	580.63	831.28	267.85	6.00	4.00	9.00	0.00	3.00	10.00	10.62	6.00	10.66
maker-tulip_contig_677_pilon_pilon-augustus-gene-0.23-mRNA-1	0.00	0.00	0.00	6.00	9.00	3.00	0.00	0.00	3.00	2.00	2.00	0.00	2.00	0.00	1.00	1.00	0.00	1.00
augustus_masked-tulip_contig_362_pilon_pilon-processed-gene-3.6-mRNA-1	63.00	92.00	101.00	15.00	30.00	31.00	62.00	105.00	52.00	8141.00	2720.00	4294.00	33.00	7.00	16.00	59.00	15.00	53.00
maker-tulip_contig_236_pilon_pilon-augustus-gene-4.104-mRNA-1	74.00	54.00	71.00	113.00	132.00	103.00	240.00	155.00	107.00	18.00	25.00	23.00	190.00	22.00	46.00	238.00	56.00	115.00
maker-tulip_contig_361_pilon_pilon-augustus-gene-0.40-mRNA-1	38.00	52.00	26.00	431.00	196.00	365.00	843.00	740.00	441.00	4129.00	3146.00	2073.00	5472.00	611.00	2754.00	2528.00	855.00	2382.00
maker-tulip_contig_6_pilon_pilon-augustus-gene-0.11-mRNA-1	2018.00	1323.00	1652.00	513.00	675.00	648.00	908.00	766.00	561.00	443.00	355.00	364.00	1586.00	196.00	1090.00	222.00	76.00	191.00
maker-tulip_contig_354_pilon_pilon-augustus-gene-0.21-mRNA-1	0.00	0.00	0.00	0.00	0.00	0.00	0.00	0.00	0.00	0.00	0.00	0.00	0.00	0.00	0.00	0.00	0.00	0.00
maker-tulip_contig_581_pilon_pilon-augustus-gene-1.14-mRNA-1	217.00	349.00	290.00	526.00	656.00	557.00	707.00	1028.00	478.00	1175.00	690.00	842.00	2765.00	366.00	912.00	1410.00	705.00	2068.00
augustus_masked-tulip_contig_72_pilon_pilon-processed-gene-1.126-mRNA-1	0.00	0.00	0.00	4.00	9.00	5.00	1.00	1.00	1.00	2.00	4.00	4.00	2.00	0.00	1.00	0.00	0.00	7.00
maker-tulip_contig_41_pilon_pilon-augustus-gene-0.9-mRNA-1	0.00	0.00	0.00	35.00	36.00	19.00	34.00	31.00	25.00	0.00	4.00	2.00	7.00	1.00	8.00	13.00	6.00	9.00
maker-tulip_contig_648_pilon_pilon-augustus-gene-1.16-mRNA-1	319.00	359.00	330.00	71.00	101.00	74.00	64.00	45.00	48.00	56.00	56.00	55.00	384.00	60.00	324.00	19.00	6.00	17.00
augustus_masked-tulip_contig_659_pilon_pilon-processed-gene-1.27-mRNA-1	0.00	0.00	0.00	2.00	0.00	0.00	0.00	0.00	0.00	0.00	1.00	0.00	0.00	0.00	0.00	0.00	0.00	0.00
maker-tulip_contig_334_pilon_pilon-augustus-gene-3.9-mRNA-1	0.00	4.00	0.00	4.00	9.00	1.00	1.00	2.00	1.00	1.00	1.00	1.00	1.00	0.00	0.00	0.00	0.00	0.00
maker-tulip_contig_360_pilon_pilon-augustus-gene-2.26-mRNA-1	0.00	0.00	0.00	0.00	0.00	0.00	0.00	0.00	0.00	0.00	0.00	0.00	0.00	0.00	0.00	38.00	20.00	43.00
maker-tulip_contig_3_pilon_pilon-augustus-gene-2.27-mRNA-1	61.00	20.00	60.00	862.00	897.00	860.00	1533.00	1087.00	1091.00	17.00	8.00	16.00	240.00	28.00	148.00	467.00	285.00	697.00
augustus_masked-tulip_contig_29_pilon_pilon-processed-gene-1.23-mRNA-1	1.00	3.00	1.00	2.00	4.00	3.00	1.00	1.00	1.00	5.00	3.00	4.00	2.00	0.00	0.00	4.00	0.00	2.00
augustus_masked-tulip_contig_907_pilon_pilon-processed-gene-1.1-mRNA-1	1.00	5.00	0.00	0.00	0.00	0.00	0.00	0.00	0.00	0.00	0.00	0.00	1.00	0.00	1.00	0.00	0.00	0.00
augustus_masked-tulip_contig_843_pilon_pilon-processed-gene-4.6-mRNA-1	0.00	9.27	0.00	0.00	0.00	0.00	12.58	0.00	0.00	5.90	5.73	0.00	14.51	0.00	29.58	0.00	0.00	10.25
maker-tulip_contig_586_pilon_pilon-augustus-gene-2.21-mRNA-1	0.00	0.00	0.00	0.00	0.00	0.00	1.00	0.00	0.00	1.00	0.00	0.00	0.00	0.00	1.00	0.00	0.00	0.00
maker-tulip_contig_829_pilon_pilon-augustus-gene-2.11-mRNA-1	3.00	1.00	6.00	3.00	2.00	2.00	1.00	3.00	1.00	1.00	2.00	0.00	11.00	1.00	5.00	10.00	4.00	5.00
augustus_masked-tulip_contig_95_pilon_pilon-processed-gene-0.15-mRNA-1	0.00	3.00	0.00	0.00	1.00	1.00	0.00	0.00	0.00	0.00	0.00	0.00	0.00	0.00	1.00	0.00	0.00	0.00
maker-tulip_contig_710_pilon_pilon-augustus-gene-0.65-mRNA-1	9.00	5.00	10.00	805.45	1632.42	1910.08	379.13	4256.16	235.00	110.89	156.97	228.66	47.00	4.00	41.00	51.00	16.00	55.00
maker-tulip_contig_907_pilon_pilon-augustus-gene-8.9-mRNA-1	403.00	416.00	414.00	407.00	370.00	350.00	310.00	230.00	189.00	1431.00	1301.00	1238.00	699.00	69.00	492.00	436.00	194.00	464.00
augustus_masked-tulip_contig_753_pilon_pilon-processed-gene-0.0-mRNA-1	0.00	0.00	0.00	0.00	0.00	0.00	0.00	0.00	1.00	0.00	0.00	1.00	11.00	2.00	6.00	8.00	2.00	4.00
augustus_masked-tulip_contig_843_pilon_pilon-processed-gene-1.2-mRNA-1	15.00	17.00	13.00	63.00	49.00	60.00	78.00	147.00	76.00	78.00	63.00	71.00	207.00	25.00	173.00	128.00	49.00	121.00
maker-tulip_contig_229_pilon_pilon-augustus-gene-0.12-mRNA-1	13.00	13.00	12.00	27.00	38.00	30.00	20.00	22.00	25.00	62.00	19.00	27.00	254.00	31.00	126.00	192.00	69.00	144.00
maker-tulip_contig_514_pilon_pilon-augustus-gene-0.16-mRNA-1	45.00	21.00	40.00	1328.00	1532.00	1524.00	533.00	647.00	380.00	131.00	141.00	182.00	154.00	17.00	101.00	257.00	129.00	328.00
maker-tulip_contig_321_pilon_pilon-augustus-gene-0.19-mRNA-1	0.00	0.00	0.00	0.00	0.00	1.00	0.00	3.00	1.00	0.00	1.00	0.00	1.00	1.00	0.00	0.00	0.00	1.00
maker-tulip_contig_112_pilon_pilon-augustus-gene-3.77-mRNA-1	1.00	0.00	0.00	0.00	0.00	0.00	0.00	0.00	0.00	1.00	1.00	0.00	0.00	0.00	0.00	2.00	0.00	0.00
augustus_masked-tulip_contig_559_pilon_pilon-processed-gene-3.33-mRNA-1	0.00	0.00	0.00	178.00	306.00	293.00	140.00	183.00	71.00	0.00	0.00	0.00	6.00	4.00	14.00	16.00	0.00	5.00
maker-tulip_contig_257_pilon_pilon-augustus-gene-0.8-mRNA-1	2.00	7.00	1.00	1.00	1.00	0.00	0.00	0.00	0.00	12.00	7.00	12.00	121.00	7.00	45.00	156.00	96.00	220.00
maker-tulip_contig_584_pilon_pilon-augustus-gene-1.12-mRNA-1	0.00	0.00	0.00	12.00	19.00	13.00	5.00	4.00	3.00	0.00	1.00	0.00	2.00	0.00	0.00	0.00	0.00	0.00
augustus_masked-tulip_contig_327_pilon_pilon-processed-gene-8.5-mRNA-1	0.00	0.00	0.00	2.00	0.00	0.00	0.00	0.00	0.00	0.00	0.00	0.00	3.00	0.00	0.00	0.00	0.00	0.00
maker-tulip_contig_39_pilon_pilon-augustus-gene-0.24-mRNA-1	0.00	0.00	0.00	72.00	70.00	60.00	27.00	35.00	12.00	18.00	16.00	6.00	7.00	0.00	8.00	6.00	3.00	11.00
maker-tulip_contig_186_pilon_pilon-augustus-gene-0.12-mRNA-1	0.00	0.00	0.00	0.00	0.00	0.00	0.00	0.00	0.00	0.00	0.00	0.00	0.00	0.00	0.00	0.00	0.00	0.00
maker-tulip_contig_312_pilon_pilon-augustus-gene-0.1-mRNA-1	1496.00	860.00	1171.00	401.00	446.00	507.00	607.00	554.00	366.00	487.00	335.00	460.00	1355.00	197.00	787.00	214.00	80.00	180.00
maker-tulip_contig_441_pilon_pilon-augustus-gene-1.172-mRNA-1	0.00	1.00	0.00	0.00	0.00	0.00	0.00	0.00	0.00	0.00	0.00	0.00	0.00	0.00	0.00	0.00	0.00	0.00
augustus_masked-tulip_contig_69_pilon_pilon-processed-gene-0.28-mRNA-1	0.00	0.00	0.00	0.00	0.00	0.00	0.00	0.00	0.00	0.00	0.00	0.00	0.00	0.00	0.00	0.00	0.00	0.00
augustus_masked-tulip_contig_612_pilon_pilon-processed-gene-0.6-mRNA-1	0.00	0.00	0.00	0.00	0.00	0.00	0.00	0.00	0.00	0.00	0.00	0.00	0.00	0.00	0.00	0.00	0.00	0.00
maker-tulip_contig_583_pilon_pilon-augustus-gene-2.42-mRNA-1	16.78	2.90	2.66	5.84	5.51	5.59	1.00	0.00	0.00	0.00	0.00	0.00	0.00	0.00	1.52	1.00	1.00	3.73
augustus_masked-tulip_contig_505_pilon_pilon-processed-gene-0.38-mRNA-1	31.00	20.00	43.00	16.00	17.00	19.00	19.00	22.00	20.00	122.00	92.00	117.00	84.00	17.00	51.00	21.00	8.00	7.00
augustus_masked-tulip_contig_327_pilon_pilon-processed-gene-8.8-mRNA-1	1.00	0.00	1.00	0.00	0.00	0.00	0.00	0.00	0.00	0.00	0.00	0.00	0.00	0.00	0.00	0.00	0.00	0.00
maker-tulip_contig_351_pilon_pilon-augustus-gene-0.17-mRNA-1	0.00	0.00	0.00	1.00	0.00	0.00	2.00	0.00	0.00	0.00	0.00	1.00	4.00	0.00	0.00	30.00	19.00	21.00
augustus_masked-tulip_contig_631_pilon_pilon-processed-gene-0.5-mRNA-1	0.00	0.00	0.00	0.00	0.00	0.00	0.00	0.00	0.00	0.00	0.00	0.00	0.00	0.00	0.00	0.00	0.00	0.00
augustus_masked-tulip_contig_287_pilon_pilon-processed-gene-1.155-mRNA-1	380.00	237.00	441.00	1017.00	1211.00	913.00	333.00	315.00	221.00	1186.00	680.00	1039.00	322.00	56.00	258.00	289.00	98.00	240.00
augustus_masked-tulip_contig_339_pilon_pilon-processed-gene-3.14-mRNA-1	0.00	0.00	2.00	15.00	4.00	14.00	14.00	6.00	8.00	2.00	3.00	6.00	31.00	5.00	29.00	6.00	0.00	4.00
augustus_masked-tulip_contig_512_pilon_pilon-processed-gene-0.76-mRNA-1	1489.00	1390.00	1584.00	473.00	476.00	486.00	297.00	323.00	239.00	1002.00	691.00	942.00	1747.00	231.00	1071.00	432.00	181.00	458.00
maker-tulip_contig_474_pilon_pilon-augustus-gene-0.109-mRNA-1	1237.00	1224.00	1360.00	700.00	882.00	845.00	1355.00	2095.00	1012.00	1271.00	847.00	1089.00	2419.00	364.00	1306.00	390.00	230.00	538.00
maker-tulip_contig_603_pilon_pilon-augustus-gene-2.9-mRNA-1	6.00	11.00	9.00	192.00	229.00	225.00	41.00	24.00	34.00	14.00	9.00	17.00	10.00	0.00	5.00	20.00	17.00	31.00
maker-tulip_contig_837_pilon_pilon-augustus-gene-2.18-mRNA-1	68.00	77.00	85.00	232.00	201.00	221.00	124.00	126.00	86.00	145.00	95.00	131.00	433.00	49.00	280.00	191.00	140.00	311.00
maker-tulip_contig_732_pilon_pilon-augustus-gene-5.6-mRNA-1	14.00	16.00	10.00	223.00	229.00	221.00	645.00	530.00	415.00	94.00	96.00	110.00	352.00	36.00	246.00	236.00	78.00	513.00
augustus_masked-tulip_contig_778_pilon_pilon-processed-gene-0.9-mRNA-1	0.00	0.00	0.00	0.00	0.00	0.00	0.00	0.00	0.00	0.00	0.00	0.00	0.00	0.00	0.00	0.00	0.00	0.00
augustus_masked-tulip_contig_4_pilon_pilon-processed-gene-1.57-mRNA-1	32.00	32.00	18.00	22.00	19.00	13.00	10.00	9.00	5.00	19.00	17.00	19.00	146.00	15.00	92.00	63.00	28.00	49.00
augustus_masked-tulip_contig_316_pilon_pilon-processed-gene-2.38-mRNA-1	0.25	0.00	0.25	0.25	0.25	0.75	0.00	0.25	0.25	0.50	0.00	0.00	5.75	0.75	0.00	3.00	0.25	1.25
maker-tulip_contig_54_pilon_pilon-augustus-gene-0.9-mRNA-1	778.00	656.00	728.00	323.00	319.00	338.00	269.00	227.00	165.00	558.00	472.00	575.00	1447.00	169.00	831.00	299.00	153.00	328.00
maker-tulip_contig_610_pilon_pilon-augustus-gene-0.26-mRNA-1	91.00	52.00	82.00	129.00	137.00	111.00	88.00	49.00	61.00	197.00	134.00	195.00	232.00	40.00	172.00	114.00	50.00	140.00
augustus_masked-tulip_contig_187_pilon_pilon-processed-gene-0.5-mRNA-1	2.12	3.22	0.00	0.00	0.00	3.49	0.00	7.12	0.00	6.04	3.58	17.60	1.95	0.00	2.10	2.27	1.56	2.48
augustus_masked-tulip_contig_768_pilon_pilon-processed-gene-0.5-mRNA-1	0.00	0.00	0.00	0.00	0.00	0.00	0.00	0.00	0.00	0.00	0.00	0.00	0.00	0.00	0.00	0.00	0.00	0.00
maker-tulip_contig_515_pilon_pilon-augustus-gene-3.36-mRNA-1	588.00	507.00	560.00	864.00	1010.00	977.00	1176.00	1375.00	763.00	968.00	758.00	912.00	1954.00	282.00	1336.00	411.00	242.00	522.00
maker-tulip_contig_73_pilon_pilon-augustus-gene-0.89-mRNA-1	131.00	121.00	101.00	188.00	222.00	201.00	326.00	232.00	233.00	2454.00	2371.00	2593.00	1678.00	210.00	856.00	851.00	314.00	782.00
augustus_masked-tulip_contig_201_pilon_pilon-processed-gene-0.1-mRNA-1	0.00	0.00	0.00	0.00	0.00	0.00	0.00	0.00	0.00	1.00	0.00	0.00	0.00	0.00	0.00	0.00	0.00	0.00
maker-tulip_contig_169_pilon_pilon-augustus-gene-0.21-mRNA-1	44.00	50.00	39.00	86.00	101.00	108.00	50.00	58.00	52.00	32.00	28.00	23.00	75.00	11.00	61.36	34.00	16.96	30.00
augustus_masked-tulip_contig_228_pilon_pilon-processed-gene-1.13-mRNA-1	16.00	12.00	12.00	23.00	7.00	11.00	13.00	9.00	11.00	36.00	19.00	32.00	36.00	4.00	17.00	23.00	8.00	25.00
maker-tulip_contig_531_pilon_pilon-augustus-gene-0.25-mRNA-1	0.00	0.00	0.00	2.00	0.00	2.00	4.00	21.00	0.00	1.00	1.00	0.00	0.00	0.00	0.00	0.00	0.00	0.00
maker-tulip_contig_128_pilon_pilon-augustus-gene-0.7-mRNA-1	100.00	245.00	84.77	5.00	8.00	6.14	0.00	1.02	2.00	6.00	7.00	10.00	1036.03	145.00	756.00	6.87	1.00	5.45
augustus_masked-tulip_contig_281_pilon_pilon-processed-gene-3.58-mRNA-1	436.93	126.39	175.85	0.00	0.00	0.00	14.85	14.12	3.98	77.55	36.27	93.35	0.00	0.00	0.00	19.30	4.28	1.45
augustus_masked-tulip_contig_745_pilon_pilon-processed-gene-1.2-mRNA-1	0.00	0.00	0.00	0.00	0.00	0.00	0.00	0.00	0.00	0.00	0.00	0.00	0.00	0.00	1.00	13.00	6.00	10.00
maker-tulip_contig_57_pilon_pilon-augustus-gene-0.0-mRNA-1	0.00	0.00	0.00	1.00	0.00	0.00	0.00	1.00	0.00	0.00	0.00	0.00	0.00	0.00	0.00	0.00	0.00	0.00
augustus_masked-tulip_contig_37_pilon_pilon-processed-gene-0.5-mRNA-1	0.00	0.00	1.00	13.00	13.00	24.00	252.00	108.00	149.00	2.00	3.00	0.00	55.00	6.00	18.00	27.00	6.00	16.00
maker-tulip_contig_339_pilon_pilon-augustus-gene-0.83-mRNA-1	23.00	47.00	27.00	1.00	1.00	2.00	0.00	0.00	1.00	0.00	3.00	1.00	680.00	104.00	416.00	1.00	0.00	0.00
maker-tulip_contig_868_pilon_pilon-augustus-gene-0.9-mRNA-1	382.00	58.00	134.00	399.00	353.00	331.00	403.00	194.00	224.00	402.00	460.00	507.00	571.00	55.00	365.00	643.00	246.00	758.00
maker-tulip_contig_2_pilon_pilon-augustus-gene-2.29-mRNA-1	23.00	43.00	52.00	67.00	44.00	32.00	170.00	156.00	154.00	2726.00	2240.00	2238.00	1058.00	91.00	674.00	575.00	280.00	637.00
maker-tulip_contig_460_pilon_pilon-augustus-gene-0.22-mRNA-1	3.00	1.00	0.00	8.00	10.00	2.00	4.00	4.00	4.00	14.00	3.00	8.00	9.00	2.00	4.00	2.00	4.00	15.00
maker-tulip_contig_90_pilon_pilon-augustus-gene-0.41-mRNA-1	0.00	0.00	0.00	0.00	1.00	0.00	0.00	0.00	0.00	0.00	0.00	0.00	0.00	0.00	0.00	0.00	0.00	4.00
augustus_masked-tulip_contig_482_pilon_pilon-processed-gene-1.52-mRNA-1	0.00	0.00	0.00	1.00	0.00	0.00	4.00	2.00	0.00	0.00	0.00	0.00	3.00	0.00	1.00	1.00	0.00	0.00
maker-tulip_contig_581_pilon_pilon-augustus-gene-0.2-mRNA-1	4.00	7.00	1.00	0.00	0.00	0.00	0.00	0.00	0.00	0.00	0.00	0.00	38.00	5.00	13.00	0.00	0.00	0.00
augustus_masked-tulip_contig_361_pilon_pilon-processed-gene-1.105-mRNA-1	365.00	399.00	412.00	1852.61	1645.53	2097.63	2504.82	1398.00	1466.00	2144.98	2109.00	2593.99	980.61	115.81	517.00	734.80	282.82	604.00
augustus_masked-tulip_contig_271_pilon_pilon-processed-gene-0.9-mRNA-1	3.00	0.00	1.00	0.00	2.00	1.00	0.00	0.00	0.00	0.00	0.00	0.00	30.25	0.00	6.23	0.00	1.52	0.00
augustus_masked-tulip_contig_288_pilon_pilon-processed-gene-1.36-mRNA-1	0.58	4.93	7.42	0.62	11.94	0.02	0.01	0.00	3.84	0.00	9.02	4.80	1.15	0.15	0.13	0.00	0.00	0.61
maker-tulip_contig_356_pilon_pilon-augustus-gene-1.42-mRNA-1	268.00	233.00	246.00	233.00	217.00	184.00	150.00	155.00	142.00	282.00	192.00	266.00	356.00	43.00	160.00	241.00	69.00	191.00
maker-tulip_contig_425_pilon_pilon-augustus-gene-0.5-mRNA-1	22.00	10.00	28.00	63.00	46.00	46.00	24.00	17.00	15.00	61.00	35.00	51.00	74.00	6.00	28.00	17.00	2.00	19.00
augustus_masked-tulip_contig_52_pilon_pilon-processed-gene-1.1-mRNA-1	0.00	0.00	0.00	0.00	0.00	0.00	0.00	0.00	0.00	0.00	0.00	0.00	0.00	0.00	0.00	0.00	0.00	0.00
maker-tulip_contig_270_pilon_pilon-augustus-gene-3.68-mRNA-1	72.00	52.00	64.00	190.00	188.00	190.00	227.00	188.00	178.00	100.00	88.00	76.00	244.00	32.00	171.00	111.00	39.00	95.00
maker-tulip_contig_776_pilon_pilon-augustus-gene-0.58-mRNA-1	30.00	17.00	47.00	59.00	58.00	61.00	54.00	42.00	37.00	66.00	51.00	59.00	164.00	21.00	83.00	46.00	25.00	57.00
augustus_masked-tulip_contig_515_pilon_pilon-processed-gene-3.69-mRNA-1	0.00	3.00	3.00	83.00	124.00	93.00	6.00	12.00	5.00	1.00	1.00	0.00	0.00	0.00	1.00	1.00	0.00	1.00
maker-tulip_contig_674_pilon_pilon-augustus-gene-0.42-mRNA-1	281.00	225.00	212.00	244.00	228.00	240.00	215.00	150.00	144.00	418.00	328.00	394.00	519.00	61.00	361.00	300.00	142.00	331.00
maker-tulip_contig_597_pilon_pilon-augustus-gene-2.2-mRNA-1	739.00	909.00	1009.00	831.00	761.00	825.00	594.00	577.00	410.00	1213.00	1006.00	1254.00	1119.00	137.00	726.00	685.00	351.00	859.00
maker-tulip_contig_657_pilon_pilon-augustus-gene-0.3-mRNA-1	3.00	0.00	0.00	45.00	67.00	71.00	326.00	134.00	168.00	527.00	240.00	229.00	3252.00	362.00	1905.00	1799.00	895.00	3519.00
maker-tulip_contig_145_pilon_pilon-augustus-gene-6.12-mRNA-1	49.00	47.00	49.00	508.00	369.00	496.00	290.00	224.00	198.00	101.00	90.00	84.00	579.00	67.00	467.00	393.00	194.00	470.00
maker-tulip_contig_208_pilon_pilon-augustus-gene-1.74-mRNA-1	38.00	19.00	45.00	14.00	11.00	21.00	11.00	17.00	8.00	24.00	12.00	12.00	39.00	5.00	20.00	4.00	3.00	10.00
augustus_masked-tulip_contig_538_pilon_pilon-processed-gene-0.102-mRNA-1	69293.00	50064.00	62597.00	66376.00	72002.00	69027.00	74185.00	63901.00	43655.00	74994.00	57029.00	67525.00	94221.00	12380.00	51247.00	35457.00	12955.00	37457.00
augustus_masked-tulip_contig_698_pilon_pilon-processed-gene-2.13-mRNA-1	1.00	0.00	0.00	2.00	3.00	4.00	2.00	1.00	0.00	4.00	0.00	4.00	3.00	0.00	2.00	0.00	1.00	1.00
maker-tulip_contig_75_pilon_pilon-augustus-gene-0.2-mRNA-1	1927.00	1003.00	1364.00	383.00	487.00	523.00	636.00	776.00	389.00	160.00	123.00	145.00	729.00	105.00	510.00	44.00	21.00	40.00
maker-tulip_contig_177_pilon_pilon-augustus-gene-1.32-mRNA-1	249.00	32.00	29.00	0.00	0.00	0.00	0.00	0.00	0.00	0.00	0.00	0.00	0.00	0.00	0.00	0.00	0.00	0.00
augustus_masked-tulip_contig_635_pilon_pilon-processed-gene-0.1-mRNA-1	0.00	1.00	0.00	1.00	0.00	0.00	0.00	0.00	0.00	0.00	0.00	0.00	1.00	0.00	0.00	0.00	0.00	0.00
augustus_masked-tulip_contig_417_pilon_pilon-processed-gene-2.6-mRNA-1	0.00	0.00	0.00	0.00	0.00	0.00	0.00	0.00	0.00	0.00	0.00	0.00	0.00	0.00	0.00	0.00	0.00	0.00
maker-tulip_contig_54_pilon_pilon-augustus-gene-1.6-mRNA-1	172.00	333.00	258.00	183.00	241.00	244.00	150.00	261.00	104.00	1135.00	725.00	1090.00	266.00	33.00	208.00	293.00	83.00	288.00
maker-tulip_contig_196_pilon_pilon-augustus-gene-5.27-mRNA-1	49.00	75.00	62.00	73.00	114.00	71.00	26.00	43.00	37.00	71.00	54.00	68.00	14.00	0.00	9.00	5.00	3.00	7.00
maker-tulip_contig_462_pilon_pilon-augustus-gene-0.5-mRNA-1	204.00	184.00	179.00	348.00	313.00	333.00	241.00	197.00	152.00	280.00	210.00	313.00	533.00	79.00	393.00	294.00	127.00	290.00
maker-tulip_contig_113_pilon_pilon-augustus-gene-0.40-mRNA-1	0.00	0.00	0.00	70.00	83.00	73.00	49.00	169.00	49.00	77.00	76.00	71.00	81.00	15.00	79.00	95.00	16.00	95.00
augustus_masked-tulip_contig_907_pilon_pilon-processed-gene-0.3-mRNA-1	0.00	0.00	0.00	7.00	9.00	1.00	2.00	1.00	0.00	2.00	0.00	2.00	3.00	0.00	1.00	39.00	21.00	37.00
augustus_masked-tulip_contig_732_pilon_pilon-processed-gene-6.30-mRNA-1	0.00	0.00	0.00	0.00	0.00	1.00	2.00	0.00	0.00	1.00	0.00	0.00	0.00	0.00	0.00	0.00	0.00	0.00
augustus_masked-tulip_contig_16_pilon_pilon-processed-gene-0.4-mRNA-1	0.00	0.00	1.00	2.00	1.00	0.00	1.00	0.00	0.00	2.00	0.00	0.00	4.00	1.00	4.00	14.00	16.00	23.00
augustus_masked-tulip_contig_586_pilon_pilon-processed-gene-7.2-mRNA-1	0.00	1.00	3.00	0.00	0.00	0.00	0.00	0.00	0.00	10.32	2.11	1.22	4.51	1.12	0.00	2.48	2.00	4.98
maker-tulip_contig_147_pilon_pilon-augustus-gene-1.36-mRNA-1	0.00	0.00	0.00	247.40	325.84	250.12	56.06	41.00	40.94	35.61	26.96	35.06	366.56	45.08	167.08	66.32	24.90	54.73
augustus_masked-tulip_contig_611_pilon_pilon-processed-gene-3.20-mRNA-1	362.00	346.00	334.00	44.00	48.00	46.00	35.00	61.00	32.00	123.00	94.00	125.00	552.00	64.00	382.00	46.00	26.00	70.00
augustus_masked-tulip_contig_815_pilon_pilon-processed-gene-0.21-mRNA-1	0.00	0.00	0.00	0.00	0.00	0.00	0.00	0.00	0.00	0.00	0.00	0.00	0.00	0.00	0.00	0.00	0.00	0.00
maker-tulip_contig_284_pilon_pilon-augustus-gene-1.26-mRNA-1	1.00	6.00	6.00	185.00	88.00	151.00	224.00	114.00	223.00	296.00	225.00	234.00	120.00	12.00	58.00	191.00	56.00	135.00
maker-tulip_contig_777_pilon_pilon-augustus-gene-1.58-mRNA-1	4.03	0.00	0.00	0.00	2.42	3.22	0.00	0.00	1.59	7.72	6.44	17.33	4.43	0.00	3.76	5.59	0.00	4.16
augustus_masked-tulip_contig_1_pilon_pilon-processed-gene-4.23-mRNA-1	0.00	0.00	0.00	0.00	0.00	0.00	0.00	0.00	0.00	0.00	0.00	0.00	0.00	0.00	0.00	3.00	2.00	0.00
maker-tulip_contig_336_pilon_pilon-augustus-gene-0.65-mRNA-1	569.00	649.00	721.00	82.00	99.00	90.00	104.00	146.00	100.00	201.00	171.00	195.00	733.00	112.00	602.00	140.00	47.00	127.00
maker-tulip_contig_456_pilon_pilon-augustus-gene-0.11-mRNA-1	300.26	410.48	345.72	380.79	410.32	394.04	481.00	436.64	318.03	772.34	611.95	622.00	1030.01	121.00	666.68	425.23	235.34	564.12
maker-tulip_contig_505_pilon_pilon-augustus-gene-3.76-mRNA-1	0.00	0.00	0.00	0.00	0.00	0.00	0.00	0.00	0.00	0.00	0.00	0.00	0.00	0.00	1.00	177.00	88.00	169.00
augustus_masked-tulip_contig_31_pilon_pilon-processed-gene-0.27-mRNA-1	0.00	0.00	0.00	0.00	0.00	0.00	1.00	0.00	0.00	0.00	0.00	0.00	0.00	0.00	0.00	8.00	8.00	3.00
maker-tulip_contig_82_pilon_pilon-augustus-gene-1.36-mRNA-1	5.00	2.00	14.00	0.00	0.00	2.00	3.00	4.00	12.00	48.00	49.00	45.00	97.00	16.00	42.00	109.00	31.00	120.00
maker-tulip_contig_211_pilon_pilon-augustus-gene-4.101-mRNA-1	500.00	653.00	580.00	172.00	259.00	243.00	237.00	238.00	155.00	612.00	423.00	473.00	837.00	117.00	626.00	393.00	160.00	367.00
maker-tulip_contig_326_pilon_pilon-augustus-gene-1.4-mRNA-1	708.00	416.00	450.00	412.00	524.00	489.00	509.00	504.00	301.00	106.00	76.00	82.00	441.00	49.00	279.00	163.00	50.00	115.00
augustus_masked-tulip_contig_272_pilon_pilon-processed-gene-5.4-mRNA-1	0.00	1.00	0.00	0.00	0.00	0.00	0.00	0.00	0.00	0.00	0.00	0.00	2.00	0.00	0.00	657.00	383.00	498.00
maker-tulip_contig_474_pilon_pilon-augustus-gene-0.104-mRNA-1	3641.00	3204.00	3597.00	125.00	173.00	164.00	302.00	401.00	307.00	948.00	859.00	1049.00	1459.00	228.00	989.00	94.00	32.00	87.00
augustus_masked-tulip_contig_31_pilon_pilon-processed-gene-1.17-mRNA-1	10.00	23.00	13.00	111.00	127.00	164.00	157.00	70.00	79.00	67.00	42.00	45.00	48.00	5.00	19.00	11.00	5.00	26.00
maker-tulip_contig_257_pilon_pilon-augustus-gene-0.23-mRNA-1	1564.00	1947.00	1927.00	657.00	696.00	765.00	611.00	522.00	406.00	2512.00	2615.00	2940.00	1736.00	239.00	1052.00	897.00	290.00	791.00
maker-tulip_contig_198_pilon_pilon-augustus-gene-5.35-mRNA-1	1320.00	956.00	1349.00	123.00	168.00	169.00	221.00	263.00	173.00	209.00	185.00	203.00	850.00	109.00	630.00	55.00	39.00	44.00
augustus_masked-tulip_contig_555_pilon_pilon-processed-gene-0.1-mRNA-1	23.00	9.00	23.00	67.00	44.00	56.00	65.00	61.00	48.00	71.00	67.00	104.00	111.00	19.00	76.00	74.00	32.00	93.00
maker-tulip_contig_212_pilon_pilon-augustus-gene-1.104-mRNA-1	43.00	40.00	35.00	372.00	447.00	447.00	124.00	86.00	75.00	886.00	865.00	951.00	911.00	105.00	359.00	700.00	184.00	338.00
maker-tulip_contig_270_pilon_pilon-augustus-gene-1.43-mRNA-1	0.00	0.00	0.00	0.00	0.00	0.00	0.00	0.00	0.00	0.00	0.00	0.00	4.01	1.00	5.00	0.00	0.00	0.00
augustus_masked-tulip_contig_58_pilon_pilon-processed-gene-5.53-mRNA-1	0.00	0.00	0.00	0.00	0.00	0.00	0.00	0.00	0.00	0.00	0.00	0.00	0.00	0.00	0.00	0.00	0.00	0.00
augustus_masked-tulip_contig_334_pilon_pilon-processed-gene-2.73-mRNA-1	0.00	2.00	1.00	0.00	1.00	0.00	0.00	0.00	0.00	9.55	6.00	6.85	5.06	0.00	16.00	12.68	0.00	12.45
maker-tulip_contig_208_pilon_pilon-augustus-gene-1.96-mRNA-1	2.00	0.00	3.00	1.00	2.00	0.00	2.00	7.00	0.00	0.00	1.00	0.00	2.00	0.00	1.00	8.00	5.00	8.00
maker-tulip_contig_441_pilon_pilon-augustus-gene-4.25-mRNA-1	134.00	105.00	120.00	13.00	28.00	35.00	14.00	16.00	12.00	60.00	29.00	41.00	112.00	12.00	67.00	27.00	8.00	16.00
augustus_masked-tulip_contig_934_pilon_pilon-processed-gene-3.27-mRNA-1	207.00	156.00	143.00	12.00	18.00	19.00	26.00	37.00	10.00	20.00	13.00	19.00	68.00	9.00	46.00	2.00	2.00	4.00
maker-tulip_contig_281_pilon_pilon-augustus-gene-3.45-mRNA-1	23.00	15.00	19.00	51.00	42.00	39.00	52.00	36.00	24.00	79.00	64.00	95.00	74.00	4.00	52.00	19.00	12.00	35.00
maker-tulip_contig_843_pilon_pilon-augustus-gene-4.7-mRNA-1	100.00	59.00	66.00	226.00	234.00	230.00	131.00	96.00	82.00	156.00	135.00	169.00	252.00	27.00	141.00	81.00	32.00	103.00
maker-tulip_contig_575_pilon_pilon-augustus-gene-0.6-mRNA-1	0.00	0.00	0.99	0.00	0.00	0.00	0.00	0.00	0.00	0.00	0.00	0.00	0.00	0.00	0.00	0.00	0.00	0.00
maker-tulip_contig_234_pilon_pilon-augustus-gene-3.22-mRNA-1	17.00	9.00	23.00	43.00	55.00	30.00	19.00	11.00	19.00	42.00	27.00	28.00	123.00	20.00	74.00	35.00	10.00	32.00
maker-tulip_contig_140_pilon_pilon-augustus-gene-0.7-mRNA-1	114.19	32.44	36.04	0.00	0.00	0.00	0.00	0.00	0.00	0.00	0.00	0.00	0.00	0.00	1.25	0.00	0.00	0.00
maker-tulip_contig_674_pilon_pilon-augustus-gene-5.23-mRNA-1	21.00	6.00	13.00	686.00	829.00	768.00	805.00	794.00	420.00	467.00	315.00	476.00	1557.00	173.00	678.00	909.00	281.00	1063.00
maker-tulip_contig_216_pilon_pilon-augustus-gene-0.66-mRNA-1	180.00	284.00	216.00	114.00	126.00	174.00	30.00	22.00	30.00	451.00	455.00	388.00	603.00	83.00	451.00	22.00	11.00	30.00
maker-tulip_contig_628_pilon_pilon-augustus-gene-4.25-mRNA-1	389.63	326.45	339.79	202.74	209.47	231.17	159.36	108.55	94.82	172.69	172.67	144.73	278.62	46.22	193.05	191.18	58.26	118.59
maker-tulip_contig_473_pilon_pilon-augustus-gene-0.13-mRNA-1	0.00	0.00	0.00	0.00	0.00	0.00	0.00	0.00	0.00	0.00	0.00	0.00	0.00	0.00	0.00	1.00	1.00	2.00
maker-tulip_contig_815_pilon_pilon-augustus-gene-1.10-mRNA-1	24.00	12.00	36.00	2.48	4.00	3.00	13.00	6.00	7.45	1263.00	1125.00	1129.00	450.00	70.00	387.00	948.00	427.00	939.00
maker-tulip_contig_216_pilon_pilon-augustus-gene-0.60-mRNA-1	428.00	584.00	279.00	91.00	115.00	137.00	145.00	87.00	92.00	132.00	148.00	152.00	1669.00	209.00	1160.00	149.00	32.00	103.00
maker-tulip_contig_674_pilon_pilon-augustus-gene-2.12-mRNA-1	969.00	811.00	840.00	9.00	33.00	21.00	38.00	60.00	30.00	220.00	176.00	223.00	3478.00	603.00	2755.00	19.00	5.00	9.00
maker-tulip_contig_671_pilon_pilon-augustus-gene-0.66-mRNA-1	0.00	0.00	0.00	0.00	0.00	0.00	0.00	0.00	0.00	0.00	0.00	0.00	0.00	0.00	0.00	0.00	0.00	0.00
augustus_masked-tulip_contig_891_pilon_pilon-processed-gene-0.16-mRNA-1	0.00	0.00	0.00	0.00	0.00	0.00	0.00	0.00	0.00	0.00	0.97	0.00	0.00	0.00	0.00	0.00	0.00	0.00
maker-tulip_contig_178_pilon_pilon-augustus-gene-0.60-mRNA-1	0.00	0.00	0.00	208.00	298.00	216.00	41.00	32.00	20.00	4.00	5.00	8.00	8.00	1.00	3.00	9.00	5.00	11.00
augustus_masked-tulip_contig_424_pilon_pilon-processed-gene-2.119-mRNA-1	0.00	0.00	0.00	0.00	0.00	0.00	0.00	0.00	0.00	0.00	0.00	0.00	0.00	0.00	0.00	4.00	0.00	5.00
maker-tulip_contig_560_pilon_pilon-augustus-gene-0.19-mRNA-1	276.00	325.00	365.00	184.00	263.00	193.00	29.00	40.00	32.00	47.00	28.00	28.00	411.00	55.00	269.00	29.00	5.00	16.00
maker-tulip_contig_176_pilon_pilon-augustus-gene-0.75-mRNA-1	5.00	3.00	6.00	0.00	0.00	3.00	0.00	2.00	0.00	1.00	0.00	1.00	1.00	0.00	3.00	0.00	0.00	0.00
augustus_masked-tulip_contig_474_pilon_pilon-processed-gene-1.77-mRNA-1	0.00	0.00	0.00	0.00	0.00	0.00	0.00	0.00	0.00	1.00	0.00	1.00	1.00	0.00	0.00	0.00	0.00	0.00
maker-tulip_contig_159_pilon_pilon-augustus-gene-1.45-mRNA-1	13.00	8.00	10.00	0.00	3.00	1.00	0.00	1.00	0.00	18.00	18.00	11.00	73.00	2.00	18.00	37.00	2.00	12.00
maker-tulip_contig_860_pilon_pilon-augustus-gene-0.31-mRNA-1	0.00	0.00	0.00	0.00	0.00	0.00	0.00	0.00	0.00	0.00	0.00	0.00	0.00	0.00	0.00	18.00	3.00	11.00
maker-tulip_contig_855_pilon_pilon-augustus-gene-2.19-mRNA-1	3.00	0.00	5.00	15.00	19.00	21.00	9.00	9.00	8.00	56.00	25.00	40.00	16.00	5.00	7.00	20.00	13.00	29.00
maker-tulip_contig_387_pilon_pilon-augustus-gene-1.78-mRNA-1	50.00	107.00	34.00	444.00	337.00	514.00	622.00	416.00	432.00	780.00	657.00	805.00	1568.00	160.00	1161.00	532.00	287.00	557.00
augustus_masked-tulip_contig_378_pilon_pilon-processed-gene-2.56-mRNA-1	37.00	15.00	68.00	123.00	140.00	110.00	62.00	60.00	46.00	116.00	97.00	107.00	168.00	17.00	103.00	43.00	17.00	50.00
maker-tulip_contig_1_pilon_pilon-augustus-gene-1.11-mRNA-1	1491.00	1118.00	1274.00	595.00	586.00	639.00	671.00	1099.00	502.00	3273.00	3684.00	4210.00	2887.00	478.00	3047.00	1436.00	887.00	2500.00
maker-tulip_contig_112_pilon_pilon-augustus-gene-1.5-mRNA-1	3.00	1.00	2.00	7.00	6.00	11.00	65.00	28.00	21.00	58.00	33.00	38.00	555.00	58.00	234.00	206.00	89.00	273.00
maker-tulip_contig_318_pilon_pilon-augustus-gene-0.56-mRNA-1	0.00	0.00	0.00	204.00	207.00	171.00	126.00	108.00	68.00	95.00	52.00	83.00	138.00	10.00	84.00	154.00	50.00	199.00
maker-tulip_contig_482_pilon_pilon-augustus-gene-2.10-mRNA-1	34.00	26.00	46.00	448.00	246.00	397.00	267.00	230.00	173.00	138.00	87.00	144.00	327.00	26.00	186.00	302.00	97.00	340.00
maker-tulip_contig_66_pilon_pilon-augustus-gene-2.28-mRNA-1	0.00	0.00	0.00	0.00	0.00	0.00	0.00	0.00	0.00	0.00	0.00	0.00	0.00	0.00	0.00	0.00	0.00	0.00
maker-tulip_contig_78_pilon_pilon-augustus-gene-0.27-mRNA-1	74.00	113.00	100.00	15.00	16.00	7.00	15.00	20.00	10.00	41.00	26.00	28.00	66.00	6.00	51.00	16.00	3.00	4.00
maker-tulip_contig_480_pilon_pilon-augustus-gene-0.6-mRNA-1	0.00	0.00	0.00	0.00	5.00	5.00	0.00	1.00	1.00	0.00	1.00	0.00	2.00	1.00	3.00	0.00	0.00	3.00
maker-tulip_contig_2_pilon_pilon-augustus-gene-5.68-mRNA-1	0.00	11.00	16.00	2019.00	2168.00	2257.00	2389.00	1615.00	1547.00	630.00	1046.00	1314.00	194.00	30.00	96.00	138.00	68.00	116.00
maker-tulip_contig_2_pilon_pilon-augustus-gene-8.12-mRNA-1	10738.00	9677.00	9110.00	9104.00	9837.00	9724.00	11540.00	12188.00	6855.00	5513.00	4219.00	4747.00	6569.00	1041.00	4590.00	2413.00	952.00	2148.00
maker-tulip_contig_59_pilon_pilon-augustus-gene-1.32-mRNA-1	1013.00	1261.00	1265.00	80.00	109.00	102.00	141.00	186.00	138.00	362.00	250.00	334.00	1565.00	242.00	1179.00	65.00	25.00	37.00
maker-tulip_contig_507_pilon_pilon-augustus-gene-0.75-mRNA-1	726.00	511.00	647.00	352.00	371.00	385.00	367.00	359.00	303.00	633.00	524.00	616.00	1240.00	173.00	854.00	327.00	138.00	312.00
maker-tulip_contig_778_pilon_pilon-augustus-gene-0.15-mRNA-1	2.78	4.71	0.00	0.00	3.00	0.00	1.00	1.00	0.00	1.00	0.00	1.00	0.31	0.00	6.89	1.00	0.00	0.00
maker-tulip_contig_622_pilon_pilon-augustus-gene-0.22-mRNA-1	0.00	0.00	0.00	0.00	0.00	0.00	0.00	0.00	0.00	1.00	0.00	1.00	1.00	0.00	0.00	1.00	0.00	0.00
maker-tulip_contig_360_pilon_pilon-augustus-gene-0.46-mRNA-1	52.88	66.13	37.41	27.43	14.84	19.62	7.29	3.22	9.90	115.98	85.05	135.49	30.41	5.61	10.00	33.49	10.71	34.99
augustus_masked-tulip_contig_774_pilon_pilon-processed-gene-0.41-mRNA-1	0.00	1.00	0.00	5.00	2.00	0.00	2.00	1.00	1.00	3.00	0.00	0.00	5.00	1.00	4.00	3.00	0.00	1.00
maker-tulip_contig_704_pilon_pilon-augustus-gene-1.12-mRNA-1	13653.00	13038.00	12548.00	6973.00	8056.00	8032.00	9806.00	10111.00	5620.00	6095.00	4516.00	5081.00	8138.00	1124.00	5221.00	2014.00	781.00	1869.00
maker-tulip_contig_199_pilon_pilon-augustus-gene-0.27-mRNA-1	271.00	66.00	197.00	106.00	107.00	78.00	97.00	98.00	81.00	121.00	83.00	119.00	253.00	31.00	97.00	100.00	22.00	52.00
maker-tulip_contig_667_pilon_pilon-augustus-gene-0.77-mRNA-1	534.58	658.71	682.37	586.87	576.28	632.52	563.11	430.14	348.39	1095.16	711.62	978.73	1730.67	213.71	1015.62	784.64	246.86	690.04
augustus_masked-tulip_contig_661_pilon_pilon-processed-gene-1.51-mRNA-1	9.00	10.00	19.00	110.00	90.00	77.00	51.00	29.00	56.00	55.00	54.00	50.00	170.00	14.00	60.00	88.00	43.00	88.00
maker-tulip_contig_121_pilon_pilon-augustus-gene-2.2-mRNA-1	914.00	528.00	646.00	728.00	1435.00	1024.00	944.00	1210.00	831.00	238.00	242.00	244.00	886.00	116.00	631.00	435.00	225.00	564.00
maker-tulip_contig_909_pilon_pilon-augustus-gene-0.35-mRNA-1	1.00	0.00	0.00	0.00	0.00	0.00	0.00	0.00	0.00	0.00	0.00	0.00	0.00	0.00	5.00	0.00	0.00	0.00
maker-tulip_contig_40_pilon_pilon-augustus-gene-0.8-mRNA-1	367.00	415.00	298.00	236.00	225.00	262.00	232.00	198.00	132.00	225.00	207.00	199.00	1401.00	209.00	985.00	228.00	96.00	267.00
maker-tulip_contig_424_pilon_pilon-augustus-gene-0.81-mRNA-1	234.00	201.00	253.00	90.00	92.00	113.00	48.00	40.00	32.00	138.00	131.00	128.00	475.00	58.00	396.00	99.00	40.00	92.00
maker-tulip_contig_289_pilon_pilon-augustus-gene-0.23-mRNA-1	0.00	0.00	0.00	5.00	8.00	11.00	1.00	8.00	2.00	0.00	5.00	6.00	20.00	1.00	25.00	7.00	20.00	95.00
maker-tulip_contig_362_pilon_pilon-augustus-gene-7.16-mRNA-1	262.00	230.00	319.00	68.00	73.00	92.00	62.00	84.00	52.00	270.00	254.00	297.00	184.00	31.00	151.00	66.00	27.00	58.00
maker-tulip_contig_90_pilon_pilon-augustus-gene-0.62-mRNA-1	0.00	0.00	0.00	0.00	0.00	0.00	0.00	0.00	0.00	0.00	0.00	0.00	0.00	0.00	0.00	0.00	0.00	0.00
augustus_masked-tulip_contig_333_pilon_pilon-processed-gene-1.64-mRNA-1	95.00	63.00	75.00	69.00	64.00	73.00	70.00	89.00	59.00	53.00	51.00	71.00	372.00	47.00	219.00	192.00	48.00	219.00
maker-tulip_contig_112_pilon_pilon-augustus-gene-0.11-mRNA-1	4.00	10.00	8.00	1.00	2.00	3.00	15.00	5.00	1.00	8.00	2.00	2.00	0.00	2.00	2.00	2.00	0.00	3.00
maker-tulip_contig_148_pilon_pilon-augustus-gene-0.4-mRNA-1	0.00	0.00	2.00	8.00	7.00	8.00	11.00	10.00	11.00	12.00	5.00	2.00	13.00	1.00	13.00	12.00	4.00	13.00
maker-tulip_contig_234_pilon_pilon-augustus-gene-2.26-mRNA-1	743.00	438.00	589.00	169.00	224.00	193.00	377.00	326.00	231.00	277.00	196.00	244.00	314.00	64.00	208.00	93.00	43.00	78.00
augustus_masked-tulip_contig_603_pilon_pilon-processed-gene-0.1-mRNA-1	0.00	0.00	0.00	1.00	0.00	0.00	1.00	0.00	0.00	0.00	1.00	0.00	0.00	0.00	0.00	0.00	0.00	0.00
augustus_masked-tulip_contig_437_pilon_pilon-processed-gene-0.91-mRNA-1	0.00	0.00	0.00	0.00	0.00	0.00	0.00	0.00	0.00	0.00	0.00	0.00	0.00	0.00	0.00	2.00	0.00	1.00
maker-tulip_contig_138_pilon_pilon-augustus-gene-0.73-mRNA-1	554.00	407.00	525.00	1167.00	1579.00	1526.00	1434.00	1380.00	621.00	226.00	91.00	81.00	1669.00	248.00	1270.00	108.00	48.00	108.00
maker-tulip_contig_59_pilon_pilon-augustus-gene-2.31-mRNA-1	4857.00	4089.00	4896.00	923.00	1397.00	1155.00	998.00	1294.00	892.00	2022.00	1598.00	1926.00	7904.00	1117.00	4447.00	576.00	345.00	590.00
maker-tulip_contig_212_pilon_pilon-augustus-gene-0.39-mRNA-1	0.83	15.56	2.86	7.26	11.11	6.77	0.00	0.00	0.00	12.35	4.47	0.00	2.35	0.75	1.78	3.75	0.00	2.29
maker-tulip_contig_687_pilon_pilon-augustus-gene-2.11-mRNA-1	1.00	0.00	0.00	0.00	0.00	0.00	0.00	0.00	0.00	1.00	1.00	2.00	4.00	1.00	2.00	157.00	7.00	31.00
maker-tulip_contig_65_pilon_pilon-augustus-gene-0.4-mRNA-1	91.00	75.00	89.00	118.00	107.00	112.00	87.00	142.00	78.00	121.00	100.00	83.00	282.97	43.00	199.87	62.00	38.00	70.00
maker-tulip_contig_745_pilon_pilon-augustus-gene-0.15-mRNA-1	0.00	0.00	0.00	0.00	0.00	0.00	0.00	0.00	0.00	0.00	0.00	0.00	0.00	0.00	0.00	0.00	0.00	0.00
augustus_masked-tulip_contig_698_pilon_pilon-processed-gene-1.10-mRNA-1	0.00	3.00	0.00	110.00	157.00	121.00	34.00	31.00	34.00	13.00	5.00	6.00	16.00	1.00	8.00	16.00	12.00	21.00
maker-tulip_contig_738_pilon_pilon-augustus-gene-0.1-mRNA-1	13.53	15.23	13.89	0.00	0.00	0.00	1.70	1.03	1.95	4.79	0.00	3.62	1.29	1.00	2.85	10.67	3.00	3.86
augustus_masked-tulip_contig_931_pilon_pilon-processed-gene-0.1-mRNA-1	3.00	5.00	3.00	0.00	0.00	0.00	0.00	1.00	0.00	2.00	0.00	1.00	3.00	3.00	3.00	2.00	2.00	5.00
maker-tulip_contig_372_pilon_pilon-augustus-gene-2.11-mRNA-1	0.00	4.00	0.00	2.00	0.00	0.00	0.00	0.00	0.00	0.00	1.00	0.00	0.00	0.00	0.00	18.00	6.00	15.00
maker-tulip_contig_137_pilon_pilon-augustus-gene-0.2-mRNA-1	1225.00	1018.00	1135.00	1242.00	1396.00	1324.00	1082.00	1087.00	731.00	851.00	536.00	642.00	1255.00	193.00	735.00	564.00	207.00	512.00
maker-tulip_contig_516_pilon_pilon-augustus-gene-2.30-mRNA-1	2.00	6.00	9.00	1.00	2.00	1.00	0.00	1.00	0.00	1.00	1.00	2.00	2.00	0.00	3.00	0.00	0.00	0.00
maker-tulip_contig_620_pilon_pilon-augustus-gene-0.90-mRNA-1	6.00	6.00	1.00	3.00	7.00	5.00	4.00	3.00	2.00	9.00	5.00	6.00	5.00	0.00	2.00	2.00	1.00	7.00
augustus_masked-tulip_contig_778_pilon_pilon-processed-gene-0.7-mRNA-1	3.00	0.00	2.00	5.00	23.00	26.00	48.00	65.00	35.00	118.00	80.00	73.00	127.00	14.00	82.00	102.00	43.00	115.00
maker-tulip_contig_279_pilon_pilon-augustus-gene-3.4-mRNA-1	26.00	24.00	30.00	227.00	193.00	194.00	75.00	62.00	72.00	204.00	150.00	203.00	213.00	29.00	134.00	135.00	48.00	161.00
augustus_masked-tulip_contig_938_pilon_pilon-processed-gene-0.8-mRNA-1	0.00	0.00	0.00	0.00	0.00	0.00	0.00	0.00	0.00	0.00	0.60	0.00	0.00	0.00	0.00	0.00	0.00	0.00
maker-tulip_contig_586_pilon_pilon-augustus-gene-10.51-mRNA-1	0.00	0.00	0.00	722.00	1105.00	1157.00	391.00	603.00	196.00	213.00	197.00	249.00	66.00	12.00	34.00	88.00	19.00	50.00
maker-tulip_contig_586_pilon_pilon-augustus-gene-12.35-mRNA-1	0.00	0.00	0.00	426.00	417.00	413.00	143.00	146.00	106.00	27.00	32.00	26.00	800.00	75.00	346.00	654.00	183.00	763.00
maker-tulip_contig_59_pilon_pilon-augustus-gene-2.27-mRNA-1	0.00	0.00	0.00	0.00	0.00	0.00	0.00	0.00	0.00	0.00	0.00	0.00	2.00	1.00	2.00	9.00	3.00	4.00
augustus_masked-tulip_contig_620_pilon_pilon-processed-gene-3.34-mRNA-1	0.00	0.00	0.00	0.00	0.00	0.00	0.00	0.00	0.00	0.00	0.00	0.00	0.00	0.00	0.00	0.00	0.00	0.00
augustus_masked-tulip_contig_747_pilon_pilon-processed-gene-0.9-mRNA-1	321.32	209.20	227.84	12.46	30.99	15.10	15.84	10.48	7.00	25.79	21.70	20.62	22.79	8.52	36.85	30.21	8.44	10.96
maker-tulip_contig_211_pilon_pilon-augustus-gene-2.50-mRNA-1	32.00	64.00	23.00	8.00	5.00	6.00	4.00	10.00	9.00	892.00	591.00	839.00	318.00	51.00	244.00	19.00	4.00	12.00
augustus_masked-tulip_contig_169_pilon_pilon-processed-gene-0.3-mRNA-1	168.00	139.00	143.00	2315.00	1397.00	1773.00	2712.00	1008.00	1378.00	247.00	201.00	180.00	1721.00	194.00	921.00	1074.00	380.00	1234.00
augustus_masked-tulip_contig_831_pilon_pilon-processed-gene-0.2-mRNA-1	839.00	53.00	253.00	15.00	8.00	13.00	10.00	10.00	6.00	1.00	4.00	0.00	15.00	3.00	10.00	33.00	5.00	9.00
maker-tulip_contig_218_pilon_pilon-augustus-gene-0.98-mRNA-1	0.00	0.00	0.00	12.00	6.00	224.00	11845.00	4414.00	4873.00	2.00	0.00	0.00	0.00	0.00	1.00	0.00	0.00	0.00
maker-tulip_contig_145_pilon_pilon-augustus-gene-2.107-mRNA-1	246.00	129.00	221.00	403.00	496.00	431.00	537.00	455.00	383.00	189.00	126.00	137.00	576.00	74.00	310.00	78.00	30.00	90.00
augustus_masked-tulip_contig_653_pilon_pilon-processed-gene-0.163-mRNA-1	0.00	3.00	0.00	15.00	5.22	2.00	11.00	6.00	9.00	1.00	1.00	2.00	1.00	0.00	1.00	2.00	0.00	0.00
maker-tulip_contig_867_pilon_pilon-augustus-gene-0.10-mRNA-1	31.00	9.00	31.00	14765.00	13620.00	14563.00	13050.00	9001.00	8080.00	6953.00	5615.00	6827.00	10120.00	826.00	5253.00	8943.00	2985.00	10667.00
augustus_masked-tulip_contig_645_pilon_pilon-processed-gene-2.38-mRNA-1	233.00	341.00	161.00	1005.00	822.00	731.00	607.00	695.00	396.00	957.00	543.00	588.00	2117.00	171.00	757.00	901.00	322.00	903.00
maker-tulip_contig_15_pilon_pilon-augustus-gene-3.77-mRNA-1	0.00	0.00	0.00	0.00	0.00	0.00	0.00	0.00	0.00	2.00	2.00	2.00	0.00	0.00	0.00	0.00	0.00	0.00
augustus_masked-tulip_contig_895_pilon_pilon-processed-gene-2.8-mRNA-1	3.00	12.00	17.00	34.00	31.00	36.00	12.00	16.00	12.00	50.00	46.00	72.00	201.00	31.00	119.00	33.00	21.00	27.00
maker-tulip_contig_537_pilon_pilon-augustus-gene-1.4-mRNA-1	36.00	80.00	62.00	254.04	211.00	213.00	457.00	344.00	243.00	542.36	587.00	638.00	314.14	46.35	307.00	134.00	59.00	205.00
augustus_masked-tulip_contig_673_pilon_pilon-processed-gene-1.4-mRNA-1	45.00	64.00	52.00	432.00	588.00	471.00	342.00	436.00	244.00	263.00	229.00	230.00	591.00	71.00	311.00	345.00	137.00	268.00
augustus_masked-tulip_contig_481_pilon_pilon-processed-gene-0.29-mRNA-1	2.00	5.77	9.59	6.05	0.00	9.59	3.11	5.56	0.00	17.74	10.12	15.17	9.02	0.00	6.65	9.16	2.80	4.00
augustus_masked-tulip_contig_416_pilon_pilon-processed-gene-0.4-mRNA-1	0.00	0.00	0.00	0.00	0.00	0.00	0.00	0.00	0.00	7.00	0.00	1.00	0.00	0.00	0.00	2261.00	1068.00	1939.00
augustus_masked-tulip_contig_769_pilon_pilon-processed-gene-0.4-mRNA-1	1.00	0.00	0.00	0.00	0.00	0.00	0.00	0.00	0.00	0.00	0.00	0.00	0.00	0.00	0.00	1.00	0.00	0.00
maker-tulip_contig_362_pilon_pilon-augustus-gene-0.21-mRNA-1	150.00	119.00	109.00	70.00	75.00	59.00	27.00	29.00	21.00	144.00	102.00	134.00	330.00	54.00	257.00	34.00	26.00	63.00
maker-tulip_contig_429_pilon_pilon-augustus-gene-1.51-mRNA-1	183.00	154.00	155.00	513.00	619.00	590.00	214.00	156.00	135.00	434.00	362.00	454.00	603.00	63.00	429.00	242.00	97.00	195.00
maker-tulip_contig_859_pilon_pilon-augustus-gene-0.20-mRNA-1	13.21	19.78	35.17	3.11	0.00	10.94	7.16	5.91	5.37	21.63	6.31	15.81	18.10	0.00	11.97	7.21	3.06	6.28
maker-tulip_contig_441_pilon_pilon-augustus-gene-10.12-mRNA-1	2522.00	1792.00	2331.00	2824.00	2996.00	2892.00	1185.00	1153.00	811.00	1152.00	1062.00	1059.00	2951.00	311.00	1884.00	2536.00	1212.00	2941.00
maker-tulip_contig_505_pilon_pilon-augustus-gene-0.5-mRNA-1	21.00	37.00	35.00	68.00	110.00	84.00	104.00	66.00	38.00	329.00	228.00	235.00	516.00	84.00	454.00	937.00	407.00	864.00
maker-tulip_contig_673_pilon_pilon-augustus-gene-1.31-mRNA-1	10.00	14.00	5.00	42.00	40.00	43.00	21.00	15.00	13.00	20.00	10.00	21.00	47.00	6.00	30.00	23.00	6.00	23.00
augustus_masked-tulip_contig_504_pilon_pilon-processed-gene-2.51-mRNA-1	12.98	15.01	9.50	4.18	4.34	4.32	3.12	1.03	2.00	4.14	3.14	6.20	0.00	0.00	3.16	4.05	1.00	0.00
maker-tulip_contig_198_pilon_pilon-augustus-gene-2.9-mRNA-1	0.00	0.00	0.00	0.00	1.00	0.00	2.00	0.00	0.00	0.00	1.00	0.00	1.00	0.00	1.00	0.00	0.00	0.00
augustus_masked-tulip_contig_807_pilon_pilon-processed-gene-0.6-mRNA-1	0.00	0.00	0.00	0.00	0.00	1.91	0.00	0.00	0.00	0.00	0.00	0.00	0.00	0.00	0.00	0.00	0.00	1.00
maker-tulip_contig_674_pilon_pilon-augustus-gene-2.17-mRNA-1	0.00	2.00	0.00	16.00	16.00	20.00	1.00	3.00	0.00	4.00	2.00	2.00	2.00	0.00	2.00	4.00	0.00	1.00
maker-tulip_contig_531_pilon_pilon-augustus-gene-3.8-mRNA-1	289.00	181.00	176.00	223.00	297.00	256.00	433.00	343.00	209.00	108.00	65.00	61.00	519.00	52.00	234.00	114.00	29.00	71.00
maker-tulip_contig_687_pilon_pilon-augustus-gene-1.29-mRNA-1	0.00	0.00	0.00	0.00	0.00	0.00	0.00	0.00	0.00	0.00	0.00	0.00	0.00	0.00	0.00	0.00	0.00	0.00
maker-tulip_contig_95_pilon_pilon-augustus-gene-0.56-mRNA-1	25.00	35.00	24.00	1676.00	1589.00	1586.00	196.00	123.00	93.00	50.00	29.00	43.00	215.00	27.00	175.00	336.00	168.00	366.00
augustus_masked-tulip_contig_112_pilon_pilon-processed-gene-2.55-mRNA-1	256.00	117.00	193.00	935.00	963.00	945.00	1867.00	2427.00	1376.00	435.00	398.00	474.00	1919.00	302.00	1309.00	1411.00	847.00	1964.00
maker-tulip_contig_194_pilon_pilon-augustus-gene-0.13-mRNA-1	407.00	339.00	416.00	375.00	256.00	274.00	258.00	223.00	230.00	1558.00	1554.00	1582.00	1796.00	209.00	990.00	941.00	328.00	883.00
maker-tulip_contig_69_pilon_pilon-augustus-gene-1.6-mRNA-1	0.00	0.00	2.00	1.00	1.00	1.00	0.00	0.00	1.00	0.00	1.00	0.00	29.00	2.00	11.00	0.00	0.00	0.00
augustus_masked-tulip_contig_586_pilon_pilon-processed-gene-2.46-mRNA-1	140.03	247.52	139.81	179.57	220.84	200.37	135.01	156.64	101.00	358.63	295.62	311.26	603.11	96.00	411.50	267.97	200.60	536.49
maker-tulip_contig_616_pilon_pilon-augustus-gene-0.14-mRNA-1	403.00	345.00	331.00	336.00	365.00	398.00	427.00	471.00	266.00	102.00	73.00	70.00	454.00	37.00	289.00	128.00	37.00	102.00
augustus_masked-tulip_contig_40_pilon_pilon-processed-gene-0.52-mRNA-1	60.00	42.00	57.00	50.00	49.00	75.00	64.00	70.00	35.00	33.00	21.00	19.00	82.00	14.00	75.00	34.00	9.00	44.00
maker-tulip_contig_531_pilon_pilon-augustus-gene-5.2-mRNA-1	0.00	0.00	0.00	0.00	0.00	0.00	0.00	0.00	0.00	0.00	0.00	0.00	1.00	0.00	0.00	0.00	0.00	0.00
maker-tulip_contig_340_pilon_pilon-augustus-gene-0.21-mRNA-1	414.00	208.00	324.00	151.00	207.00	204.00	276.00	244.00	176.00	141.00	70.00	91.00	437.00	49.00	269.00	35.00	20.00	30.00
maker-tulip_contig_339_pilon_pilon-augustus-gene-2.8-mRNA-1	0.00	0.00	0.00	0.00	0.00	0.00	0.00	0.00	0.00	0.00	0.00	0.00	2.00	0.00	0.00	116.00	54.00	55.00
augustus_masked-tulip_contig_479_pilon_pilon-processed-gene-1.10-mRNA-1	196.71	130.50	156.58	6.00	0.00	6.00	2.00	2.00	1.00	5.00	4.29	12.00	28.23	6.00	16.00	5.00	3.00	4.00
maker-tulip_contig_907_pilon_pilon-augustus-gene-2.16-mRNA-1	12.00	8.00	12.00	30.00	38.00	44.00	18.00	33.00	18.00	34.00	29.00	23.00	225.00	26.00	65.00	93.00	66.00	69.00
maker-tulip_contig_815_pilon_pilon-augustus-gene-0.4-mRNA-1	0.00	0.00	0.00	1.00	1.00	0.00	0.00	0.00	0.00	0.00	0.00	0.00	0.00	0.00	0.00	0.00	0.00	0.00
maker-tulip_contig_468_pilon_pilon-augustus-gene-3.27-mRNA-1	54.00	4.00	20.00	1925.00	1484.00	1808.00	3355.00	2118.00	2046.00	1150.00	907.00	1109.00	1916.00	218.00	918.00	1648.00	555.00	1439.00
maker-tulip_contig_595_pilon_pilon-augustus-gene-0.28-mRNA-1	0.00	2.00	4.59	4.00	6.00	2.00	1.98	1.00	4.00	16.90	2.00	10.00	25.00	2.00	15.00	6.00	2.00	12.00
maker-tulip_contig_635_pilon_pilon-augustus-gene-0.9-mRNA-1	0.00	0.00	0.00	0.00	0.00	0.00	0.00	0.00	0.00	0.00	0.00	0.00	0.00	0.00	0.00	0.00	0.00	0.00
augustus_masked-tulip_contig_537_pilon_pilon-processed-gene-1.34-mRNA-1	3458.00	3851.00	4066.00	515.00	511.00	552.00	380.00	312.00	255.00	741.00	816.00	875.00	652.00	87.00	440.00	353.00	136.00	353.00
maker-tulip_contig_33_pilon_pilon-augustus-gene-1.34-mRNA-1	2.00	2.00	3.00	1.00	0.00	0.00	0.00	0.00	0.00	0.00	0.00	0.00	25.00	2.00	21.00	12.00	10.00	11.00
augustus_masked-tulip_contig_773_pilon_pilon-processed-gene-1.11-mRNA-1	242.00	180.00	202.00	474.00	443.00	498.00	698.00	589.00	390.00	236.00	236.00	249.00	869.00	108.00	553.00	283.00	109.00	253.00
maker-tulip_contig_556_pilon_pilon-augustus-gene-0.0-mRNA-1	0.00	0.00	4.00	0.00	0.00	1.00	2.00	1.00	1.00	0.00	1.00	0.00	0.00	0.00	0.00	0.00	0.00	0.00
maker-tulip_contig_698_pilon_pilon-augustus-gene-3.2-mRNA-1	0.00	0.00	0.00	0.00	0.00	0.00	19.00	272.00	113.00	1.00	0.00	0.00	6.00	0.00	10.00	0.00	0.00	0.00
maker-tulip_contig_199_pilon_pilon-augustus-gene-1.1-mRNA-1	334.00	332.00	326.00	607.00	580.00	610.00	409.00	448.00	233.00	657.00	645.00	675.00	824.04	117.86	601.09	453.00	174.00	432.01
maker-tulip_contig_402_pilon_pilon-augustus-gene-2.31-mRNA-1	92.00	61.00	113.00	57.00	51.00	57.00	20.00	20.00	20.00	72.00	65.00	105.00	212.00	28.00	156.00	32.00	14.00	37.00
augustus_masked-tulip_contig_364_pilon_pilon-processed-gene-0.5-mRNA-1	1125.95	905.20	954.46	496.89	594.85	611.26	684.66	774.57	484.74	231.88	164.00	197.73	985.72	96.56	650.59	237.33	89.09	134.01
maker-tulip_contig_3_pilon_pilon-augustus-gene-2.13-mRNA-1	0.00	0.00	0.00	0.00	0.00	0.00	0.00	0.00	0.00	0.00	0.00	0.00	0.00	0.00	0.00	3.00	2.00	0.00
maker-tulip_contig_318_pilon_pilon-augustus-gene-1.26-mRNA-1	1037.00	659.00	888.00	486.00	434.00	341.00	1011.00	517.00	591.00	138.00	130.00	156.00	618.00	114.00	466.00	92.00	49.00	119.00
maker-tulip_contig_196_pilon_pilon-augustus-gene-0.1-mRNA-1	27.00	49.00	23.00	60.00	40.00	34.00	40.00	27.00	23.00	62.00	61.00	71.00	143.00	14.00	79.00	49.00	31.00	63.00
maker-tulip_contig_114_pilon_pilon-augustus-gene-0.0-mRNA-1	777.46	648.66	688.95	398.41	396.67	405.97	185.47	217.61	121.61	1680.62	1586.69	1586.65	1207.00	155.00	862.22	576.71	381.29	1102.15
augustus_masked-tulip_contig_854_pilon_pilon-processed-gene-2.5-mRNA-1	0.00	0.00	0.00	0.00	0.00	0.00	0.00	0.00	0.00	0.00	0.00	0.00	0.00	0.00	0.00	0.00	0.00	0.00
augustus_masked-tulip_contig_351_pilon_pilon-processed-gene-1.120-mRNA-1	41.20	42.00	82.20	11.66	0.00	10.93	23.40	25.54	2.20	16.91	15.06	19.22	8.97	3.52	5.82	6.33	0.00	3.64
augustus_masked-tulip_contig_168_pilon_pilon-processed-gene-0.90-mRNA-1	531.05	504.00	633.86	391.16	377.97	394.21	263.73	244.44	185.42	273.91	235.83	261.08	563.50	77.00	345.19	152.28	63.45	194.03
augustus_masked-tulip_contig_716_pilon_pilon-processed-gene-0.0-mRNA-1	96.00	98.00	137.00	475.00	604.00	469.00	624.00	507.00	385.00	667.00	498.00	659.00	1335.00	224.00	750.00	419.00	158.00	427.00
maker-tulip_contig_329_pilon_pilon-augustus-gene-0.10-mRNA-1	134.00	91.00	84.00	21.00	21.00	29.00	21.00	22.00	9.00	15.00	12.00	15.00	21.00	3.00	9.00	12.00	5.00	12.00
maker-tulip_contig_441_pilon_pilon-augustus-gene-10.8-mRNA-1	652.00	649.00	580.00	747.00	843.00	829.00	856.00	864.00	449.00	635.00	404.00	486.00	1496.00	159.00	653.00	1040.00	333.00	757.00
maker-tulip_contig_468_pilon_pilon-augustus-gene-1.29-mRNA-1	395.00	224.00	314.00	1447.00	1571.00	1535.00	1191.00	1352.00	945.00	1209.00	967.00	1082.00	2032.00	272.00	1201.00	1760.00	834.00	1817.00
augustus_masked-tulip_contig_58_pilon_pilon-processed-gene-5.51-mRNA-1	26.39	8.19	7.83	37.18	30.06	21.94	65.19	20.51	17.23	66.87	74.37	77.52	345.72	41.24	263.97	214.69	45.09	180.23
augustus_masked-tulip_contig_687_pilon_pilon-processed-gene-2.23-mRNA-1	0.00	0.00	0.00	3.00	3.00	1.00	0.00	0.00	0.00	0.00	0.00	0.00	0.00	0.00	0.00	1.00	0.00	2.00
maker-tulip_contig_523_pilon_pilon-augustus-gene-0.105-mRNA-1	1598.00	1282.00	1334.00	2131.00	2393.00	2272.00	2010.00	2249.00	1241.00	397.00	297.00	338.00	3614.00	324.00	1854.00	4496.00	675.00	2701.00
augustus_masked-tulip_contig_405_pilon_pilon-processed-gene-0.6-mRNA-1	0.00	1.00	0.00	0.00	1.00	1.00	0.00	0.00	0.00	0.00	0.00	0.00	0.00	0.00	1.00	868.00	134.00	220.00
augustus_masked-tulip_contig_136_pilon_pilon-processed-gene-0.2-mRNA-1	0.00	0.00	0.00	0.00	0.00	0.00	0.00	0.00	0.00	0.00	0.00	0.00	0.00	0.00	0.00	0.00	0.00	0.00
augustus_masked-tulip_contig_482_pilon_pilon-processed-gene-1.57-mRNA-1	0.00	0.00	0.00	0.50	0.00	0.00	2.00	0.00	1.00	2.50	5.00	0.50	7.67	3.00	12.67	13.00	3.00	0.00
maker-tulip_contig_715_pilon_pilon-augustus-gene-1.0-mRNA-1	12.00	12.00	20.00	29.00	23.00	18.00	50.00	51.00	36.00	69.00	42.00	52.00	29.00	4.00	17.00	29.00	7.00	24.00
maker-tulip_contig_15_pilon_pilon-augustus-gene-1.13-mRNA-1	10465.00	7696.00	9556.00	1311.00	1349.00	1230.00	1010.00	1344.00	846.00	6382.00	4924.00	5377.00	4304.00	538.00	2529.00	1780.00	720.00	1704.00
augustus_masked-tulip_contig_474_pilon_pilon-processed-gene-2.27-mRNA-1	0.00	12.00	0.00	0.00	0.00	0.00	0.00	0.00	0.00	0.00	0.00	0.00	0.00	0.00	0.00	184.00	98.00	144.00
maker-tulip_contig_327_pilon_pilon-augustus-gene-2.32-mRNA-1	0.00	0.00	0.00	0.00	0.00	0.00	0.00	0.00	0.00	0.00	1.00	0.00	0.00	0.00	0.00	1.00	0.00	0.00
maker-tulip_contig_294_pilon_pilon-augustus-gene-1.0-mRNA-1	0.00	3.00	1.00	20.00	41.58	32.00	6.00	11.00	4.58	6.55	8.00	0.00	22.76	2.00	13.00	30.00	14.86	23.79
maker-tulip_contig_555_pilon_pilon-augustus-gene-2.22-mRNA-1	0.00	7.47	0.00	0.00	0.00	0.00	0.00	0.00	0.00	0.00	1.07	0.00	0.00	0.00	0.00	0.00	0.00	0.00
maker-tulip_contig_623_pilon_pilon-augustus-gene-3.34-mRNA-1	0.00	0.00	0.00	193.00	267.00	213.00	367.00	331.00	219.00	0.00	0.00	0.00	0.00	0.00	0.00	0.00	0.00	0.00
augustus_masked-tulip_contig_732_pilon_pilon-processed-gene-4.5-mRNA-1	2.00	4.00	1.00	73.00	83.00	67.00	56.00	26.00	23.00	12.00	8.00	12.00	25.00	11.00	16.00	15.00	3.00	11.00
maker-tulip_contig_611_pilon_pilon-augustus-gene-3.29-mRNA-1	0.00	0.00	0.00	0.00	0.00	0.00	0.00	0.00	0.00	0.00	1.00	0.00	0.00	0.00	1.00	8.00	5.00	9.00
maker-tulip_contig_667_pilon_pilon-augustus-gene-0.33-mRNA-1	211.00	49.00	244.00	272.00	217.00	195.00	275.00	204.00	216.00	241.00	179.00	251.00	455.00	56.00	202.00	147.00	60.00	160.00
augustus_masked-tulip_contig_147_pilon_pilon-processed-gene-0.18-mRNA-1	33.00	33.00	29.00	177.00	140.00	149.00	139.00	94.00	82.00	194.00	153.00	194.00	506.00	67.00	302.00	214.00	69.00	167.00
augustus_masked-tulip_contig_414_pilon_pilon-processed-gene-0.4-mRNA-1	36.23	19.38	28.20	18.02	8.91	10.67	1.09	0.00	1.42	8.47	8.23	0.00	0.00	2.00	0.92	2.81	4.58	0.00
maker-tulip_contig_112_pilon_pilon-augustus-gene-0.32-mRNA-1	2.00	3.00	3.00	13.00	9.00	4.00	8.00	8.00	2.00	14.00	8.00	17.00	24.00	1.00	6.00	9.00	1.00	24.00
maker-tulip_contig_905_pilon_pilon-augustus-gene-0.62-mRNA-1	0.00	0.00	1.00	1.00	0.00	0.00	0.00	0.00	0.00	32.75	11.44	19.56	0.00	0.00	0.00	0.00	0.00	0.00
maker-tulip_contig_919_pilon_pilon-augustus-gene-0.0-mRNA-1	0.00	0.00	1.00	0.00	0.00	0.00	0.00	0.00	0.00	0.00	0.00	0.00	0.00	0.00	0.00	25.00	61.00	110.00
maker-tulip_contig_572_pilon_pilon-augustus-gene-0.0-mRNA-1	7.00	7.00	13.00	3.00	1.00	0.00	3.00	0.00	0.00	1.00	2.70	0.00	1.42	0.00	0.00	0.00	0.00	1.00
maker-tulip_contig_669_pilon_pilon-augustus-gene-2.81-mRNA-1	0.00	0.00	0.00	0.00	0.00	0.00	0.00	0.00	0.00	0.00	0.00	0.00	0.00	0.00	0.00	11.00	11.00	24.00
maker-tulip_contig_168_pilon_pilon-augustus-gene-1.23-mRNA-1	95.00	64.00	129.00	24.00	15.00	33.00	36.00	17.00	15.00	84.00	30.00	48.00	3.00	0.00	1.00	3.00	1.00	1.00
maker-tulip_contig_321_pilon_pilon-augustus-gene-0.16-mRNA-1	35.00	12.00	36.00	22.00	26.00	32.00	30.00	28.00	15.00	62.00	28.00	55.00	79.00	9.00	30.00	17.00	5.00	18.00
maker-tulip_contig_632_pilon_pilon-augustus-gene-3.39-mRNA-1	210.00	250.00	166.00	361.00	445.00	369.00	261.00	271.00	186.00	185.00	175.00	182.00	1019.00	150.00	727.00	695.00	411.00	862.00
maker-tulip_contig_360_pilon_pilon-augustus-gene-2.70-mRNA-1	0.00	0.00	0.00	118.00	206.00	180.00	148.00	164.00	55.00	1.00	1.00	1.00	0.00	0.00	0.00	3.00	0.00	0.00
augustus_masked-tulip_contig_711_pilon_pilon-processed-gene-2.21-mRNA-1	0.00	0.00	1.79	5.69	7.48	3.67	10.86	4.50	0.80	16.74	6.68	6.07	32.90	4.86	16.37	9.51	7.17	19.65
augustus_masked-tulip_contig_119_pilon_pilon-processed-gene-0.2-mRNA-1	1.00	2.00	0.00	0.00	0.00	1.00	2.00	0.00	0.00	1.00	0.00	1.00	1.00	0.00	0.00	0.00	0.00	1.00
maker-tulip_contig_211_pilon_pilon-augustus-gene-4.87-mRNA-1	0.00	0.00	0.00	0.00	0.00	0.00	0.00	0.00	0.00	0.00	0.00	0.00	0.00	0.00	0.00	0.00	0.00	0.00
maker-tulip_contig_3_pilon_pilon-augustus-gene-6.15-mRNA-1	1298.00	1497.00	1472.00	1455.00	1626.00	1475.00	1119.00	1062.00	856.00	1830.00	1506.00	1775.00	2834.00	390.00	1523.00	1100.00	439.00	1206.00
augustus_masked-tulip_contig_687_pilon_pilon-processed-gene-1.69-mRNA-1	717.00	699.00	651.00	511.00	678.00	601.00	685.00	642.00	392.00	715.00	440.00	555.00	1430.00	219.00	858.00	279.00	110.00	334.00
maker-tulip_contig_84_pilon_pilon-augustus-gene-0.23-mRNA-1	36.14	37.00	27.99	0.00	0.00	0.00	0.00	0.00	0.00	0.00	0.00	0.00	0.00	0.00	0.00	2.00	0.00	1.00
augustus_masked-tulip_contig_541_pilon_pilon-processed-gene-0.0-mRNA-1	213.00	129.00	182.00	43.00	76.00	60.00	55.00	49.00	56.00	128.00	150.00	163.00	271.00	29.00	273.00	61.00	13.00	65.00
maker-tulip_contig_270_pilon_pilon-augustus-gene-3.86-mRNA-1	0.00	0.00	0.00	20.45	34.00	17.00	5.00	9.00	6.00	4.16	2.00	2.00	7.10	0.00	1.00	7.00	1.00	7.30
maker-tulip_contig_831_pilon_pilon-augustus-gene-0.97-mRNA-1	244.00	246.00	217.00	896.00	719.00	859.00	711.00	430.00	399.00	166.00	162.00	178.00	1838.00	209.00	926.00	1384.00	353.00	1398.00
augustus_masked-tulip_contig_287_pilon_pilon-processed-gene-0.24-mRNA-1	195.00	46.00	205.00	277.00	313.00	267.00	107.00	100.00	100.00	194.00	170.00	162.00	396.00	67.00	280.00	81.00	52.00	134.00
maker-tulip_contig_360_pilon_pilon-augustus-gene-1.33-mRNA-1	0.00	0.00	2.00	0.00	2.00	0.00	1.00	0.00	0.00	1.00	0.00	2.00	0.00	1.00	0.00	0.00	0.00	0.00
maker-tulip_contig_909_pilon_pilon-augustus-gene-0.31-mRNA-1	116.00	57.00	90.00	146.00	141.00	115.00	101.00	73.00	79.00	145.00	149.00	133.00	941.00	141.00	508.00	168.00	88.00	250.00
augustus_masked-tulip_contig_732_pilon_pilon-processed-gene-3.28-mRNA-1	0.00	0.00	4.00	0.00	1.00	0.00	0.00	0.00	0.00	0.00	3.00	2.00	3.00	1.00	2.00	2.00	0.00	1.00
augustus_masked-tulip_contig_82_pilon_pilon-processed-gene-1.10-mRNA-1	0.00	0.00	0.00	0.00	0.00	0.00	0.00	0.00	0.00	0.00	0.00	0.00	0.00	0.00	1.00	0.00	0.00	0.00
augustus_masked-tulip_contig_4_pilon_pilon-processed-gene-1.59-mRNA-1	10.00	5.00	8.00	56.00	73.00	60.00	167.00	144.00	97.00	60.00	52.00	61.00	359.00	38.00	258.00	319.00	80.00	398.00
maker-tulip_contig_776_pilon_pilon-augustus-gene-0.21-mRNA-1	1.00	3.00	3.00	214.00	321.00	315.00	537.00	455.00	322.00	1.00	2.00	2.00	7.00	2.00	9.00	172.00	57.00	137.00
maker-tulip_contig_24_pilon_pilon-augustus-gene-0.55-mRNA-1	7.00	6.00	6.00	0.00	0.00	7.00	4.00	0.00	0.00	6.00	5.00	15.00	3.00	1.00	4.00	0.00	0.00	0.00
maker-tulip_contig_523_pilon_pilon-augustus-gene-0.75-mRNA-1	10.00	22.00	13.00	1.00	0.00	0.00	3.00	0.00	0.00	12.00	10.00	8.00	7.00	2.00	11.00	4.00	0.00	5.00
maker-tulip_contig_378_pilon_pilon-augustus-gene-2.28-mRNA-1	2.00	4.00	6.00	15.00	16.00	19.00	13.00	8.00	9.00	27.00	13.00	16.00	24.00	3.00	18.00	4.00	3.00	8.00
augustus_masked-tulip_contig_550_pilon_pilon-processed-gene-0.21-mRNA-1	68.00	69.00	61.00	74.00	79.00	76.00	35.00	39.00	24.00	100.00	68.00	89.00	256.00	40.00	191.00	53.00	25.00	78.00
augustus_masked-tulip_contig_224_pilon_pilon-processed-gene-1.3-mRNA-1	0.00	0.00	0.00	22.00	40.00	14.00	0.00	2.00	0.00	1.00	1.00	0.00	6.00	1.00	7.00	2.00	1.00	5.00
maker-tulip_contig_394_pilon_pilon-augustus-gene-3.22-mRNA-1	667.00	324.00	497.00	806.00	936.00	854.00	500.00	496.00	229.00	511.00	354.00	462.00	1110.00	145.00	616.00	582.00	170.00	363.00
maker-tulip_contig_59_pilon_pilon-augustus-gene-2.64-mRNA-1	1910.00	2359.70	2495.36	314.88	315.33	364.94	538.73	432.01	411.75	472.17	392.55	459.61	2406.16	297.32	1437.93	112.89	45.14	96.30
augustus_masked-tulip_contig_603_pilon_pilon-processed-gene-0.5-mRNA-1	0.00	0.00	0.00	5.00	2.00	1.00	2.00	1.00	0.00	0.00	4.00	2.00	1.00	0.00	1.00	5.00	0.00	1.00
maker-tulip_contig_176_pilon_pilon-augustus-gene-0.58-mRNA-1	0.00	1.00	1.00	0.00	0.00	0.00	0.00	0.00	0.00	0.00	0.00	0.00	0.00	0.00	0.00	0.00	1.00	0.00
maker-tulip_contig_236_pilon_pilon-augustus-gene-8.17-mRNA-1	6346.00	8048.00	8247.00	4170.00	2713.00	2728.00	1479.00	1124.00	856.00	1604.00	1067.00	1320.00	3501.00	476.00	3783.00	2739.00	901.00	4190.00
augustus_masked-tulip_contig_194_pilon_pilon-processed-gene-0.78-mRNA-1	0.00	1.00	0.00	2.00	0.00	2.00	0.00	0.00	0.00	1.00	0.00	0.00	2.00	0.00	0.00	0.00	0.00	0.00
maker-tulip_contig_845_pilon_pilon-augustus-gene-0.37-mRNA-1	0.00	0.00	2.00	1.00	0.00	1.00	2.00	0.00	1.00	1.00	0.00	3.00	0.00	1.00	1.00	2.00	0.00	0.00
maker-tulip_contig_387_pilon_pilon-augustus-gene-1.54-mRNA-1	196.00	119.00	175.00	67.00	61.00	68.00	55.00	54.00	56.00	213.00	189.00	238.00	134.00	17.00	88.00	97.00	33.00	81.00
maker-tulip_contig_81_pilon_pilon-augustus-gene-4.12-mRNA-1	160.00	201.00	139.00	830.00	754.00	851.00	736.00	478.00	516.00	750.00	626.00	731.00	1402.00	165.00	829.00	1062.00	376.00	1067.00
maker-tulip_contig_58_pilon_pilon-augustus-gene-1.0-mRNA-1	2311.00	1850.00	2091.00	556.00	643.00	613.00	419.00	394.00	337.00	1147.00	1009.00	1092.00	2215.00	265.00	1695.00	339.00	166.00	317.00
maker-tulip_contig_34_pilon_pilon-augustus-gene-0.99-mRNA-1	0.00	0.00	0.00	5.00	0.00	10.00	9.00	11.00	2.00	0.00	0.00	0.00	0.00	0.00	0.00	0.00	0.00	0.00
maker-tulip_contig_56_pilon_pilon-augustus-gene-0.35-mRNA-1	0.00	0.00	0.00	146.00	120.00	163.00	167.00	125.00	81.00	117.00	74.00	94.00	496.00	51.00	309.00	415.00	73.00	621.00
augustus_masked-tulip_contig_860_pilon_pilon-processed-gene-2.9-mRNA-1	1.00	0.00	0.00	0.00	1.00	3.00	0.00	0.00	2.00	1.00	0.00	0.00	1.00	1.00	0.00	1.00	0.00	1.00
augustus_masked-tulip_contig_236_pilon_pilon-processed-gene-4.25-mRNA-1	0.00	0.00	0.00	0.00	0.00	0.00	0.00	0.00	0.00	0.00	0.00	0.00	0.00	0.00	0.00	2.26	1.58	0.00
augustus_masked-tulip_contig_430_pilon_pilon-processed-gene-0.21-mRNA-1	0.00	3.00	0.00	1.00	3.00	1.00	1.00	1.00	2.00	4.00	1.00	3.00	6.00	0.00	6.00	3.00	2.00	6.00
maker-tulip_contig_362_pilon_pilon-augustus-gene-4.27-mRNA-1	0.00	0.00	0.00	2.00	4.00	1.00	0.00	3.00	0.00	0.00	1.00	1.00	5.00	2.00	6.00	1.00	0.00	3.00
augustus_masked-tulip_contig_290_pilon_pilon-processed-gene-5.55-mRNA-1	0.00	4.00	0.00	0.00	0.00	0.00	0.00	0.00	0.00	1.00	0.00	0.00	0.00	0.00	1.00	369.00	262.00	422.00
maker-tulip_contig_463_pilon_pilon-augustus-gene-0.35-mRNA-1	2.00	6.00	0.00	0.00	0.00	0.00	0.00	0.00	0.00	12.00	4.00	6.00	20.00	4.00	19.00	5.00	2.00	11.00
maker-tulip_contig_284_pilon_pilon-augustus-gene-2.17-mRNA-1	169.00	133.00	151.00	19.00	22.00	36.00	16.00	23.00	16.00	23.00	11.00	28.00	134.00	20.00	111.00	7.00	2.00	8.00
maker-tulip_contig_407_pilon_pilon-augustus-gene-9.187-mRNA-1	19.00	37.00	32.00	16.00	11.00	23.00	17.00	27.00	17.00	15.00	16.00	16.00	81.00	7.00	45.00	11.00	5.00	20.00
maker-tulip_contig_465_pilon_pilon-augustus-gene-0.80-mRNA-1	0.00	0.00	0.00	1002.96	635.99	878.12	2687.98	9987.66	1455.74	131.36	95.96	127.58	1.00	0.00	1.00	1.00	0.00	0.00
augustus_masked-tulip_contig_66_pilon_pilon-processed-gene-3.7-mRNA-1	0.00	0.00	0.00	36.31	18.04	0.53	0.00	4.08	0.00	5.30	5.85	15.63	74.95	18.00	75.93	0.00	0.00	3.10
maker-tulip_contig_448_pilon_pilon-augustus-gene-2.10-mRNA-1	994.00	1213.00	1233.00	421.00	344.00	416.00	296.00	275.00	228.00	434.00	407.00	468.00	719.00	98.00	482.00	266.00	107.00	320.00
maker-tulip_contig_126_pilon_pilon-augustus-gene-1.30-mRNA-1	1473.00	954.00	1596.00	2324.00	3417.00	2914.00	3234.00	4158.00	1870.00	13553.00	14038.00	13563.00	7242.00	1130.00	6060.00	4485.00	3758.00	7580.00
maker-tulip_contig_2_pilon_pilon-augustus-gene-6.16-mRNA-1	27.41	39.11	8.37	18.78	6.53	17.91	5.54	7.62	5.84	18.38	35.96	46.64	45.30	4.25	29.44	58.48	21.46	55.48
maker-tulip_contig_43_pilon_pilon-augustus-gene-1.8-mRNA-1	177.00	292.00	284.00	343.00	438.00	359.00	67.00	29.00	29.00	66.00	46.00	68.00	57.00	7.00	43.00	34.00	12.00	40.00
augustus_masked-tulip_contig_61_pilon_pilon-processed-gene-0.71-mRNA-1	0.00	0.00	0.00	0.00	0.00	0.00	0.00	0.00	0.00	0.00	0.00	0.00	0.00	0.00	0.00	660.00	356.00	617.00
maker-tulip_contig_505_pilon_pilon-augustus-gene-3.103-mRNA-1	1.00	0.00	0.00	208.00	192.00	198.00	347.00	165.00	219.00	331.00	227.00	253.00	765.00	113.00	487.00	831.00	455.00	966.00
maker-tulip_contig_934_pilon_pilon-augustus-gene-4.21-mRNA-1	0.00	0.00	0.00	0.00	0.00	0.00	0.00	0.00	0.00	0.00	0.00	0.00	0.00	0.00	0.00	0.00	0.00	0.00
maker-tulip_contig_637_pilon_pilon-augustus-gene-1.21-mRNA-1	0.00	0.00	0.00	0.00	0.00	0.00	0.00	0.00	0.00	0.00	0.00	0.00	0.00	0.00	0.00	10.00	17.00	24.00
maker-tulip_contig_677_pilon_pilon-augustus-gene-0.4-mRNA-1	468.00	468.00	485.00	141.00	131.00	147.00	92.00	96.00	60.00	207.00	170.00	161.00	510.00	63.00	394.00	154.00	54.00	126.00
augustus_masked-tulip_contig_818_pilon_pilon-processed-gene-0.2-mRNA-1	1.00	0.00	1.00	0.00	0.00	0.00	7.14	1.00	50.00	4.60	1.00	9.00	4.00	0.00	5.00	3.00	4.00	3.54
augustus_masked-tulip_contig_270_pilon_pilon-processed-gene-1.91-mRNA-1	1.00	3.00	0.00	0.00	0.00	0.00	0.00	0.00	0.00	0.00	0.00	0.00	0.00	2.00	0.00	322.00	193.00	311.00
augustus_masked-tulip_contig_506_pilon_pilon-processed-gene-1.32-mRNA-1	0.00	0.00	0.00	0.00	0.00	0.00	0.00	0.00	0.00	0.00	0.00	0.00	0.00	0.00	0.00	0.00	0.00	0.00
maker-tulip_contig_557_pilon_pilon-augustus-gene-0.4-mRNA-1	679.00	540.00	572.00	512.00	571.00	552.00	374.00	342.00	245.00	263.00	216.00	225.00	655.00	74.00	367.00	291.00	100.00	220.00
augustus_masked-tulip_contig_333_pilon_pilon-processed-gene-3.36-mRNA-1	0.00	0.00	0.00	0.00	0.00	0.00	0.00	0.00	0.00	0.00	0.00	0.00	0.00	0.00	0.00	0.00	0.00	0.00
augustus_masked-tulip_contig_368_pilon_pilon-processed-gene-0.3-mRNA-1	0.00	4.00	0.00	0.00	0.00	0.00	0.00	0.00	0.00	0.00	0.00	0.00	1.00	0.00	1.00	0.00	1.00	0.00
augustus_masked-tulip_contig_531_pilon_pilon-processed-gene-4.9-mRNA-1	0.00	0.00	0.00	2.00	2.00	2.00	2.00	0.00	0.00	3.00	1.00	1.00	0.00	0.00	1.00	1.00	1.00	2.00
augustus_masked-tulip_contig_697_pilon_pilon-processed-gene-0.11-mRNA-1	0.00	0.17	0.00	0.00	0.67	0.33	1.67	0.33	0.17	2.50	0.67	1.17	0.33	0.00	0.33	0.33	0.00	0.50
maker-tulip_contig_237_pilon_pilon-augustus-gene-0.41-mRNA-1	220.00	527.00	434.00	467.00	532.00	598.00	426.00	402.00	276.00	1071.00	704.00	936.00	1051.00	157.00	621.00	353.00	159.00	338.00
augustus_masked-tulip_contig_536_pilon_pilon-processed-gene-0.18-mRNA-1	19.00	32.43	32.01	0.00	7.00	5.51	3.52	6.01	11.00	19.54	16.48	20.00	0.00	0.00	9.83	7.30	3.00	4.78
maker-tulip_contig_677_pilon_pilon-augustus-gene-0.6-mRNA-1	710.00	327.00	905.00	262.00	274.00	315.00	437.00	446.00	345.00	674.00	469.00	612.00	1781.00	274.00	1078.00	123.00	82.00	203.00
maker-tulip_contig_667_pilon_pilon-augustus-gene-0.13-mRNA-1	23.42	23.29	32.63	71.13	42.72	51.48	47.89	22.86	17.61	107.84	77.38	72.27	70.33	10.29	49.38	55.36	17.14	74.96
augustus_masked-tulip_contig_387_pilon_pilon-processed-gene-1.28-mRNA-1	0.00	0.00	0.00	1.00	3.00	4.00	0.00	0.00	1.00	0.00	0.00	1.00	3.00	0.00	2.00	1.00	3.00	1.00
augustus_masked-tulip_contig_144_pilon_pilon-processed-gene-0.1-mRNA-1	0.00	0.00	0.00	0.00	0.00	0.00	0.00	0.00	0.00	0.00	0.00	0.00	0.00	0.00	0.00	0.00	0.00	0.00
augustus_masked-tulip_contig_180_pilon_pilon-processed-gene-0.32-mRNA-1	0.00	3.00	0.00	0.00	0.00	0.00	0.00	0.00	0.00	0.00	0.00	0.00	0.00	0.00	0.00	0.00	0.00	0.00
augustus_masked-tulip_contig_236_pilon_pilon-processed-gene-2.3-mRNA-1	0.00	0.00	0.00	0.00	0.00	0.00	0.00	0.00	0.00	0.00	0.00	0.00	0.00	0.00	0.00	0.00	0.00	0.00
augustus_masked-tulip_contig_72_pilon_pilon-processed-gene-0.9-mRNA-1	901.00	493.00	674.00	359.00	418.00	405.00	510.00	594.00	380.00	211.00	155.00	202.00	1211.00	149.00	798.00	58.00	31.00	67.00
augustus_masked-tulip_contig_121_pilon_pilon-processed-gene-3.35-mRNA-1	0.00	0.00	0.00	0.00	0.00	0.00	10.14	0.00	3.00	0.00	0.00	0.00	0.00	0.00	0.00	0.00	0.00	0.00
maker-tulip_contig_702_pilon_pilon-augustus-gene-0.64-mRNA-1	312.00	384.00	338.00	249.00	244.00	252.00	341.00	337.00	234.00	257.00	280.00	248.00	1518.00	164.00	985.00	170.00	61.00	160.00
augustus_masked-tulip_contig_515_pilon_pilon-processed-gene-1.23-mRNA-1	0.00	0.00	0.00	1909.00	3629.00	2777.00	12138.00	7393.01	3351.00	488.00	262.00	239.00	0.00	0.00	0.00	0.00	0.00	0.00
augustus_masked-tulip_contig_77_pilon_pilon-processed-gene-1.26-mRNA-1	0.00	0.00	0.00	0.00	0.00	0.00	0.00	0.00	0.00	17.00	1.00	4.00	5.00	0.00	2.00	2.00	1.00	2.00
augustus_masked-tulip_contig_309_pilon_pilon-processed-gene-0.79-mRNA-1	0.00	0.00	0.00	43.00	80.00	54.00	53.00	27.00	32.00	7.00	11.00	20.00	144.00	25.00	141.00	884.00	492.00	960.00
augustus_masked-tulip_contig_441_pilon_pilon-processed-gene-6.13-mRNA-1	0.00	0.00	0.00	27.00	18.00	35.00	5.00	9.00	3.00	3.00	2.00	6.00	4.00	1.00	1.00	9.00	6.00	15.00
augustus_masked-tulip_contig_217_pilon_pilon-processed-gene-2.5-mRNA-1	36.00	19.00	23.00	40.00	25.00	41.00	56.00	37.00	28.00	52.00	29.00	34.00	112.00	17.00	90.00	67.00	28.00	68.00
augustus_masked-tulip_contig_778_pilon_pilon-processed-gene-1.30-mRNA-1	0.00	0.00	0.00	0.00	0.00	0.00	0.00	0.00	0.00	0.00	0.00	1.81	0.00	0.00	0.75	0.00	0.00	0.00
maker-tulip_contig_827_pilon_pilon-augustus-gene-2.100-mRNA-1	0.00	0.00	3.00	4403.00	2268.00	2823.00	10807.00	10589.00	6757.00	1753.00	999.00	1050.00	2358.00	326.00	1542.00	2404.00	1012.00	4460.00
maker-tulip_contig_318_pilon_pilon-augustus-gene-3.7-mRNA-1	0.00	0.00	0.00	0.00	0.00	0.00	0.00	0.00	1.00	0.00	0.00	1.00	7.00	4.00	14.00	19.00	19.00	22.00
augustus_masked-tulip_contig_531_pilon_pilon-processed-gene-4.5-mRNA-1	26.00	7.00	22.00	22.00	29.00	41.00	37.00	26.00	16.00	22.00	11.00	20.00	25.00	6.00	26.00	20.00	4.00	14.00
augustus_masked-tulip_contig_808_pilon_pilon-processed-gene-0.1-mRNA-1	0.00	0.00	0.00	0.00	0.00	0.00	0.00	0.00	0.00	0.00	0.00	0.00	2.00	0.00	0.00	0.00	0.00	0.00
maker-tulip_contig_381_pilon_pilon-augustus-gene-0.146-mRNA-1	37.00	26.00	21.00	34.00	44.00	28.00	29.00	29.00	15.00	58.00	36.00	41.00	139.00	20.00	69.00	36.00	11.00	17.00
maker-tulip_contig_491_pilon_pilon-augustus-gene-1.66-mRNA-1	610.15	506.37	496.44	113.76	169.62	122.44	105.80	159.58	107.82	224.21	212.73	184.33	1421.08	215.00	1079.05	113.36	42.88	71.18
maker-tulip_contig_671_pilon_pilon-augustus-gene-0.52-mRNA-1	1134.00	938.00	1090.00	502.00	460.00	545.00	628.00	571.00	393.00	296.00	225.00	310.00	1165.00	154.00	845.00	205.00	99.00	250.00
augustus_masked-tulip_contig_283_pilon_pilon-processed-gene-0.5-mRNA-1	0.00	0.00	1.00	3.00	1.00	1.00	0.00	1.00	0.00	4.00	0.00	2.00	0.00	0.00	0.00	0.00	0.00	2.00
augustus_masked-tulip_contig_1_pilon_pilon-processed-gene-5.2-mRNA-1	0.00	0.00	0.00	0.00	0.00	0.00	0.00	0.00	1.00	0.00	0.00	0.00	0.00	0.00	0.00	0.00	0.00	0.00
maker-tulip_contig_236_pilon_pilon-augustus-gene-7.77-mRNA-1	6822.00	7386.00	7717.00	3737.00	4346.00	4327.00	4430.00	4462.00	2979.00	6473.00	5077.00	5821.00	11240.00	1600.00	6161.00	3108.00	1409.00	2928.00
maker-tulip_contig_320_pilon_pilon-augustus-gene-2.16-mRNA-1	984.00	602.00	728.00	664.00	730.00	671.00	104.00	310.00	73.00	1178.00	810.00	1018.00	1354.00	261.00	1489.00	1620.00	1131.00	2445.00
maker-tulip_contig_95_pilon_pilon-augustus-gene-0.23-mRNA-1	0.00	0.00	0.00	0.00	0.00	0.00	0.00	0.00	0.00	0.00	0.00	0.00	2.00	0.00	0.00	1.00	0.00	0.00
maker-tulip_contig_305_pilon_pilon-augustus-gene-0.1-mRNA-1	0.00	0.00	0.00	1202.00	655.00	1664.00	1383.00	905.00	849.00	0.00	0.00	2.00	147.00	12.00	87.00	92.00	79.00	149.00
maker-tulip_contig_109_pilon_pilon-augustus-gene-0.23-mRNA-1	4.00	2.00	2.00	0.00	0.00	0.00	0.00	2.00	0.00	0.00	0.00	0.00	0.00	0.00	0.00	18.40	11.30	10.00
augustus_masked-tulip_contig_735_pilon_pilon-processed-gene-0.6-mRNA-1	1.00	0.00	0.00	0.00	1.00	5.00	0.00	0.00	0.00	0.00	0.00	0.00	0.00	0.00	12.00	23876.00	12374.00	34306.00
maker-tulip_contig_693_pilon_pilon-augustus-gene-1.8-mRNA-1	594.00	433.00	436.00	855.00	826.00	894.00	324.00	306.00	270.00	918.00	694.00	921.00	1694.00	170.00	1137.00	1110.00	290.00	1370.00
augustus_masked-tulip_contig_583_pilon_pilon-processed-gene-2.27-mRNA-1	0.00	3.00	0.00	232.00	214.00	217.00	45.00	44.00	30.00	41.00	38.00	57.00	41.00	7.00	40.00	86.00	29.00	63.00
augustus_masked-tulip_contig_907_pilon_pilon-processed-gene-8.43-mRNA-1	0.00	0.00	0.00	0.00	0.00	0.00	0.00	0.00	0.00	0.00	0.00	0.00	0.00	0.00	0.00	20.00	8.00	9.00
maker-tulip_contig_773_pilon_pilon-augustus-gene-1.44-mRNA-1	234.00	153.00	237.00	1179.00	880.00	1154.00	1358.00	842.00	772.00	1713.00	1352.00	1711.00	2515.00	333.00	1259.00	1375.00	476.00	1581.00
augustus_masked-tulip_contig_126_pilon_pilon-processed-gene-1.3-mRNA-1	9.00	18.00	10.00	4.00	2.00	3.00	2.00	1.00	0.00	9.00	4.00	3.00	14.00	1.00	11.00	560.00	364.00	609.00
augustus_masked-tulip_contig_247_pilon_pilon-processed-gene-2.172-mRNA-1	0.00	1.00	0.00	27.00	11.00	32.00	177.00	83.00	64.00	55.00	40.00	62.00	134.00	13.00	33.00	89.00	27.00	50.00
augustus_masked-tulip_contig_390_pilon_pilon-processed-gene-0.18-mRNA-1	0.00	0.00	0.00	2.00	0.00	0.00	0.67	0.00	0.00	0.00	0.50	0.00	3.00	0.00	1.51	0.00	0.00	0.00
augustus_masked-tulip_contig_597_pilon_pilon-processed-gene-5.62-mRNA-1	0.00	0.00	0.00	0.00	0.00	0.00	0.00	0.00	0.00	0.06	0.00	0.00	0.00	0.00	0.00	0.00	0.00	0.00
augustus_masked-tulip_contig_515_pilon_pilon-processed-gene-1.14-mRNA-1	0.00	0.00	0.00	1009.00	1214.14	1324.40	1622.20	1567.28	325.01	1.00	0.00	0.00	0.00	0.00	0.00	0.00	0.00	0.00
augustus_masked-tulip_contig_818_pilon_pilon-processed-gene-0.17-mRNA-1	0.00	0.00	0.00	0.00	0.00	0.00	1.00	1.00	0.00	0.00	0.00	0.00	0.00	0.00	1.00	0.00	0.00	0.00
augustus_masked-tulip_contig_18_pilon_pilon-processed-gene-0.26-mRNA-1	0.00	0.00	1.00	1.00	0.00	0.00	0.00	0.00	0.00	0.00	0.00	0.00	0.00	0.00	0.00	0.00	0.00	0.00
maker-tulip_contig_360_pilon_pilon-augustus-gene-0.30-mRNA-1	215.00	159.00	170.00	62.00	65.00	73.00	69.00	67.00	62.00	172.00	119.00	146.00	262.00	28.00	157.00	56.00	29.00	61.00
augustus_masked-tulip_contig_904_pilon_pilon-processed-gene-0.11-mRNA-1	0.00	0.00	5.00	0.00	0.00	0.00	1.00	0.00	0.00	2.99	0.99	0.00	0.00	0.00	0.00	0.00	0.00	0.00
maker-tulip_contig_420_pilon_pilon-augustus-gene-2.81-mRNA-1	45.00	6.00	15.00	1093.00	395.00	293.00	758.00	636.00	485.00	241.00	177.00	231.00	470.00	53.00	175.00	387.00	184.00	548.00
augustus_masked-tulip_contig_410_pilon_pilon-processed-gene-0.0-mRNA-1	8.00	58.00	1.00	16.00	4.00	8.00	27.00	47.00	25.00	260.00	322.00	399.00	164.00	15.00	81.00	145.00	51.00	89.00
augustus_masked-tulip_contig_774_pilon_pilon-processed-gene-0.1-mRNA-1	0.00	2.00	0.00	2.00	6.00	6.00	0.00	0.00	0.00	1.00	0.00	0.00	0.00	0.00	0.00	0.00	0.00	0.00
maker-tulip_contig_33_pilon_pilon-augustus-gene-0.78-mRNA-1	15.00	6.00	15.00	23.00	43.00	32.00	18.00	13.00	6.00	31.00	26.00	22.00	94.00	21.00	45.00	22.00	13.00	22.00
maker-tulip_contig_674_pilon_pilon-augustus-gene-8.49-mRNA-1	25.00	14.00	19.00	74.00	66.00	74.00	62.00	36.00	26.00	44.00	34.00	65.00	140.00	15.00	78.00	36.00	15.00	64.00
maker-tulip_contig_252_pilon_pilon-augustus-gene-1.4-mRNA-1	0.00	1.00	0.00	0.00	0.00	0.00	0.00	0.00	0.00	0.00	0.00	0.00	0.00	0.00	0.00	19.00	11.00	9.00
maker-tulip_contig_759_pilon_pilon-augustus-gene-0.40-mRNA-1	1014.00	1017.00	1095.00	1011.00	871.00	958.00	620.00	483.00	339.00	1348.00	1360.00	1686.00	2154.00	294.00	1176.00	1156.00	433.00	1341.00
augustus_masked-tulip_contig_144_pilon_pilon-processed-gene-0.3-mRNA-1	41.00	52.00	31.00	0.00	2.00	1.00	4.00	3.00	1.00	1.00	2.00	1.00	4.00	1.00	0.00	2.00	0.00	1.00
augustus_masked-tulip_contig_657_pilon_pilon-processed-gene-0.9-mRNA-1	0.00	0.00	0.00	3.00	1.00	2.00	3.00	1.00	2.00	13.00	0.00	1.00	35.00	4.00	31.00	30.00	18.00	59.00
maker-tulip_contig_774_pilon_pilon-augustus-gene-0.111-mRNA-1	347.00	388.00	306.00	1410.00	1627.00	1540.00	969.00	838.00	633.00	1563.00	1298.00	1379.00	1054.00	123.00	919.00	501.00	152.00	413.00
maker-tulip_contig_178_pilon_pilon-augustus-gene-0.52-mRNA-1	3.01	4.00	1.00	122.00	149.00	116.42	21.00	28.00	8.00	55.00	27.00	43.57	20.00	1.00	10.00	39.13	22.17	34.00
maker-tulip_contig_572_pilon_pilon-augustus-gene-0.30-mRNA-1	0.00	2.00	0.00	0.00	0.00	0.00	0.00	0.00	0.00	0.00	0.00	0.00	0.00	0.00	0.00	2.00	0.00	0.00
maker-tulip_contig_855_pilon_pilon-augustus-gene-2.13-mRNA-1	7.00	2.00	2.00	256.00	312.00	293.00	81.00	63.00	50.00	6.00	5.00	12.00	23.00	3.00	38.00	18.00	7.00	22.00
maker-tulip_contig_190_pilon_pilon-augustus-gene-0.9-mRNA-1	248.33	235.53	260.42	194.14	178.85	205.02	194.36	182.59	126.48	197.11	170.64	185.35	394.30	43.56	264.90	215.13	89.64	255.89
augustus_masked-tulip_contig_29_pilon_pilon-processed-gene-1.0-mRNA-1	6.00	17.00	14.00	86.00	50.00	66.00	63.00	25.00	26.00	172.00	132.00	182.00	220.00	22.00	99.00	112.00	41.00	105.00
augustus_masked-tulip_contig_104_pilon_pilon-processed-gene-0.16-mRNA-1	263.00	183.00	231.00	300.00	368.00	331.00	285.00	204.00	185.00	378.00	320.00	358.00	1014.00	159.00	582.00	161.00	72.00	162.00
maker-tulip_contig_354_pilon_pilon-augustus-gene-0.57-mRNA-1	112.00	137.00	139.00	404.00	401.00	392.00	268.00	159.00	160.00	709.00	629.00	669.00	700.00	69.00	442.00	765.00	266.00	783.00
augustus_masked-tulip_contig_595_pilon_pilon-processed-gene-0.17-mRNA-1	0.00	0.00	0.00	0.00	0.00	3.00	1.00	1.00	0.00	1.00	1.00	0.00	1.00	0.00	1.00	0.00	0.00	0.00
augustus_masked-tulip_contig_777_pilon_pilon-processed-gene-0.25-mRNA-1	0.00	4.00	3.00	101.00	78.00	106.00	36.00	19.00	34.00	30.00	6.00	7.00	23.00	0.00	11.00	13.00	4.00	13.00
maker-tulip_contig_270_pilon_pilon-augustus-gene-2.66-mRNA-1	0.00	0.00	0.00	4.00	1.00	4.00	9.00	26.00	5.00	4.00	6.00	17.00	8.00	1.00	4.00	7.00	0.00	2.00
maker-tulip_contig_491_pilon_pilon-augustus-gene-0.38-mRNA-1	7.06	2.89	2.40	1.47	1.12	2.31	0.00	2.55	0.00	0.00	8.76	6.15	7.17	0.00	3.72	7.08	0.00	2.42
maker-tulip_contig_149_pilon_pilon-augustus-gene-0.7-mRNA-1	427.94	221.00	411.00	675.90	528.00	482.89	543.92	379.58	285.89	1037.23	1069.39	1171.41	5765.92	839.00	3239.99	5594.99	3555.00	6386.98
maker-tulip_contig_504_pilon_pilon-augustus-gene-2.32-mRNA-1	92.00	97.65	104.00	40.00	44.08	47.00	12.00	10.00	13.53	32.00	32.36	43.00	50.00	4.00	54.00	20.15	11.00	30.00
maker-tulip_contig_146_pilon_pilon-augustus-gene-0.0-mRNA-1	0.00	0.00	0.00	3.00	0.00	0.00	0.00	0.00	0.00	1.00	0.00	0.00	0.00	0.00	2.00	6.00	3.00	6.00
maker-tulip_contig_30_pilon_pilon-augustus-gene-0.38-mRNA-1	1.00	0.00	0.00	0.00	0.00	0.00	0.00	0.00	0.00	1.00	0.00	0.00	0.00	0.00	0.00	0.00	0.00	0.00
maker-tulip_contig_468_pilon_pilon-augustus-gene-3.89-mRNA-1	93.00	72.00	129.00	99.00	79.00	84.00	72.00	63.00	45.00	139.00	108.00	156.00	289.00	50.00	267.00	74.00	30.00	89.00
augustus_masked-tulip_contig_426_pilon_pilon-processed-gene-1.9-mRNA-1	23.00	22.00	38.00	464.00	549.00	505.00	228.00	179.00	109.00	3.00	7.00	5.00	407.00	65.00	218.00	77.00	24.00	62.00
maker-tulip_contig_383_pilon_pilon-augustus-gene-0.29-mRNA-1	7.00	11.00	13.00	1.00	3.00	2.00	3.00	1.00	2.00	6.00	5.00	1.00	3.00	1.00	2.00	1.00	0.00	0.00
maker-tulip_contig_407_pilon_pilon-augustus-gene-0.59-mRNA-1	0.00	0.00	0.00	0.00	0.00	0.00	0.00	0.00	0.00	0.00	0.00	0.00	0.00	0.00	0.00	104.00	57.00	53.00
maker-tulip_contig_490_pilon_pilon-augustus-gene-1.4-mRNA-1	8.00	7.00	2.00	12.00	12.00	13.00	8.00	1.00	5.00	19.00	7.00	10.00	16.00	1.00	15.00	3.00	2.00	5.00
augustus_masked-tulip_contig_313_pilon_pilon-processed-gene-0.4-mRNA-1	0.00	0.00	0.00	0.00	0.00	0.00	0.00	0.00	0.00	0.00	1.00	0.00	1.77	0.00	0.00	2.00	2.00	0.00
maker-tulip_contig_168_pilon_pilon-augustus-gene-0.51-mRNA-1	426.00	299.00	303.00	202.00	195.00	212.00	230.00	184.00	148.00	370.00	239.00	293.00	926.00	109.00	557.00	379.00	110.00	378.00
maker-tulip_contig_860_pilon_pilon-augustus-gene-6.20-mRNA-1	19.00	28.00	24.00	242.00	296.00	282.00	51.00	41.00	31.00	34.00	35.00	33.00	761.00	94.00	412.00	384.00	178.00	401.00
augustus_masked-tulip_contig_44_pilon_pilon-processed-gene-6.11-mRNA-1	0.00	0.00	0.00	24.00	53.00	34.00	61.00	105.00	19.00	16.00	11.00	10.00	4.00	0.00	3.00	6.00	10.00	26.00
maker-tulip_contig_451_pilon_pilon-augustus-gene-1.35-mRNA-1	19.00	8.00	19.00	2.00	1.00	1.00	2.00	3.00	3.00	53.00	33.00	41.00	14.00	1.00	2.00	21.00	5.00	15.00
augustus_masked-tulip_contig_112_pilon_pilon-processed-gene-2.51-mRNA-1	1.00	0.00	0.00	346.97	165.18	407.00	199.00	520.87	144.00	11.00	75.72	28.00	5.00	0.00	1.00	4.00	2.00	3.00
maker-tulip_contig_372_pilon_pilon-augustus-gene-0.1-mRNA-1	295.00	272.00	215.00	86.00	69.00	101.00	91.00	69.00	45.00	416.00	241.00	365.00	205.00	25.00	138.00	133.00	24.00	69.00
augustus_masked-tulip_contig_491_pilon_pilon-processed-gene-1.79-mRNA-1	6.65	12.39	0.00	0.00	0.00	0.00	2.04	0.00	2.42	11.57	8.51	6.60	0.00	0.00	0.00	0.00	0.00	0.00
augustus_masked-tulip_contig_407_pilon_pilon-processed-gene-1.22-mRNA-1	9.00	3.00	10.00	58.00	37.00	80.00	91.00	51.00	39.00	69.00	82.00	92.00	107.00	8.00	65.00	23.00	2.00	10.00
augustus_masked-tulip_contig_715_pilon_pilon-processed-gene-0.27-mRNA-1	0.00	0.00	0.00	0.00	0.00	0.00	0.00	0.00	0.00	1.00	0.00	0.00	0.00	0.00	0.00	0.00	1.00	0.00
augustus_masked-tulip_contig_839_pilon_pilon-processed-gene-0.1-mRNA-1	80.00	42.00	125.00	89.00	97.00	54.00	72.00	49.00	63.00	602.00	522.00	707.00	223.00	29.00	143.00	79.00	41.00	80.00
augustus_masked-tulip_contig_714_pilon_pilon-processed-gene-0.91-mRNA-1	254.00	256.00	231.00	87.00	78.00	77.00	41.00	49.00	26.00	205.00	152.00	164.00	572.00	81.00	404.00	103.00	35.00	119.00
augustus_masked-tulip_contig_673_pilon_pilon-processed-gene-0.19-mRNA-1	52.00	73.00	63.00	13.00	7.00	12.00	6.00	7.00	1.00	24.00	15.00	23.00	46.00	6.00	20.00	16.00	2.00	13.00
maker-tulip_contig_603_pilon_pilon-augustus-gene-3.39-mRNA-1	1952.00	1647.00	1853.00	338.00	407.00	440.00	385.00	301.00	196.00	504.00	307.00	377.00	1051.00	156.00	732.00	274.00	98.00	199.00
augustus_masked-tulip_contig_20_pilon_pilon-processed-gene-0.9-mRNA-1	385.00	417.00	413.00	182.00	248.00	231.00	226.00	166.00	102.00	456.00	343.00	417.00	745.00	95.00	483.00	382.00	97.00	278.00
maker-tulip_contig_456_pilon_pilon-augustus-gene-1.13-mRNA-1	8.00	11.00	4.00	24.00	30.00	36.00	18.00	6.00	21.00	24.00	12.00	24.00	35.00	3.00	19.00	8.00	5.00	11.00
augustus_masked-tulip_contig_407_pilon_pilon-processed-gene-3.63-mRNA-1	166.00	89.00	190.00	125.00	147.00	139.00	90.00	61.00	47.00	263.00	222.00	238.00	342.00	48.00	266.00	159.00	77.00	167.00
maker-tulip_contig_190_pilon_pilon-augustus-gene-3.29-mRNA-1	0.00	0.00	0.00	0.00	0.00	0.00	0.00	0.00	0.00	0.00	0.00	0.00	0.00	0.00	0.00	0.00	0.00	0.00
augustus_masked-tulip_contig_208_pilon_pilon-processed-gene-0.8-mRNA-1	0.00	0.00	0.00	0.00	0.00	0.00	0.00	0.00	0.00	0.00	0.00	0.00	0.00	0.00	0.00	0.00	0.00	0.00
augustus_masked-tulip_contig_666_pilon_pilon-processed-gene-2.62-mRNA-1	4.00	6.00	3.00	34.00	39.00	29.00	18.00	7.00	13.00	35.00	20.00	33.00	48.00	9.00	34.00	13.00	1.00	19.00
augustus_masked-tulip_contig_555_pilon_pilon-processed-gene-1.37-mRNA-1	1158.00	1076.00	1103.00	503.00	526.00	522.00	487.00	447.00	313.00	1286.00	1070.00	1265.00	3572.00	440.00	1503.00	1583.00	383.00	776.00
maker-tulip_contig_15_pilon_pilon-augustus-gene-3.217-mRNA-1	0.00	0.00	0.00	0.00	0.00	0.00	0.00	0.00	0.00	3.00	0.00	1.00	2.00	0.00	0.00	0.00	0.00	0.00
augustus_masked-tulip_contig_571_pilon_pilon-processed-gene-0.5-mRNA-1	8.00	6.00	7.00	900.00	644.00	800.00	287.00	160.00	450.00	96.00	33.00	38.00	119.00	17.00	53.00	129.00	99.00	205.00
augustus_masked-tulip_contig_474_pilon_pilon-processed-gene-2.29-mRNA-1	2.00	1.00	0.00	1.00	0.00	1.00	0.00	0.00	0.00	0.00	0.00	0.00	4.00	0.00	0.00	397.00	210.00	321.00
augustus_masked-tulip_contig_777_pilon_pilon-processed-gene-1.11-mRNA-1	0.00	0.00	0.00	0.00	0.00	0.00	0.00	0.00	0.00	1.00	0.00	1.00	0.00	0.00	1.00	0.00	0.00	0.00
maker-tulip_contig_200_pilon_pilon-augustus-gene-0.8-mRNA-1	19.00	22.00	13.00	0.00	0.00	2.00	1.00	0.00	0.00	1.00	0.00	2.00	214.00	49.00	176.00	1.00	0.00	2.00
maker-tulip_contig_859_pilon_pilon-augustus-gene-0.1-mRNA-1	0.00	0.00	0.00	0.00	0.00	0.00	0.00	0.00	0.00	0.00	0.00	0.00	0.00	0.00	0.00	0.00	0.00	0.00
augustus_masked-tulip_contig_357_pilon_pilon-processed-gene-1.60-mRNA-1	0.00	0.00	0.00	0.00	0.00	0.00	0.00	0.00	0.00	0.00	0.00	0.00	0.00	0.00	0.00	0.00	0.00	0.00
augustus_masked-tulip_contig_323_pilon_pilon-processed-gene-4.26-mRNA-1	0.00	0.00	0.00	190.00	149.00	156.00	225.00	195.00	86.00	151.00	49.00	85.00	136.00	14.00	97.00	84.00	34.00	142.00
maker-tulip_contig_559_pilon_pilon-augustus-gene-2.57-mRNA-1	0.00	0.00	0.00	0.00	4.00	2.00	199.00	312.00	87.00	0.00	0.00	0.00	0.00	0.00	0.00	1.00	0.00	0.00
maker-tulip_contig_89_pilon_pilon-augustus-gene-0.27-mRNA-1	810.00	922.00	856.00	49.00	38.00	21.00	47.00	53.00	54.00	205.00	182.00	243.00	1140.00	176.00	709.00	13.00	8.00	12.00
augustus_masked-tulip_contig_704_pilon_pilon-processed-gene-2.97-mRNA-1	7.00	11.00	0.00	7.00	7.00	5.00	13.00	1.00	0.00	10.00	8.00	9.00	9.00	1.00	11.00	10.00	0.00	1.00
maker-tulip_contig_130_pilon_pilon-augustus-gene-0.21-mRNA-1	14.00	13.00	8.00	70.00	64.00	69.00	39.00	40.00	20.00	103.00	60.00	87.00	226.00	32.00	110.00	31.00	8.00	35.00
maker-tulip_contig_731_pilon_pilon-augustus-gene-0.27-mRNA-1	4086.00	3909.00	4214.00	965.00	1114.00	960.00	811.00	634.00	462.00	1481.00	1313.00	1509.00	1961.00	293.00	1192.00	541.00	204.00	579.00
maker-tulip_contig_82_pilon_pilon-augustus-gene-1.38-mRNA-1	0.00	0.00	0.00	1.00	9.00	11.00	0.00	8.00	1.00	0.00	0.00	0.00	0.00	0.00	1.00	0.00	0.00	0.00
augustus_masked-tulip_contig_33_pilon_pilon-processed-gene-4.67-mRNA-1	1.40	0.00	0.00	0.00	0.00	0.00	0.00	0.00	0.00	0.00	3.52	14.54	86.77	15.28	51.57	0.00	2.88	6.19
maker-tulip_contig_272_pilon_pilon-augustus-gene-3.7-mRNA-1	18.64	8.29	11.76	16.28	13.47	13.39	10.17	3.94	5.26	20.82	23.00	10.08	37.93	7.00	24.23	23.82	9.00	19.05
augustus_masked-tulip_contig_287_pilon_pilon-processed-gene-0.22-mRNA-1	0.00	0.00	0.00	1.00	0.00	0.00	0.00	0.00	0.00	0.00	0.00	0.00	0.00	0.00	0.00	0.00	0.00	0.00
maker-tulip_contig_636_pilon_pilon-augustus-gene-0.34-mRNA-1	153.28	144.58	156.00	102.29	130.95	119.24	91.81	69.03	53.20	150.38	104.21	127.78	79.20	8.20	53.10	64.30	19.65	51.12
augustus_masked-tulip_contig_704_pilon_pilon-processed-gene-1.39-mRNA-1	23.00	15.00	22.00	100.00	126.00	95.00	55.00	51.00	53.00	134.00	81.00	101.00	115.00	21.00	57.00	43.00	22.00	89.00
maker-tulip_contig_16_pilon_pilon-augustus-gene-0.10-mRNA-1	3185.00	1858.00	2535.00	278.00	309.00	321.00	280.00	221.00	165.00	602.00	542.00	553.00	1008.00	125.00	579.00	597.00	180.00	405.00
maker-tulip_contig_732_pilon_pilon-augustus-gene-5.10-mRNA-1	0.00	0.00	0.00	0.00	1.00	1.00	7.00	1.00	0.00	1.00	0.00	1.00	0.00	0.00	0.00	0.00	0.00	0.00
maker-tulip_contig_669_pilon_pilon-augustus-gene-0.2-mRNA-1	2.00	0.00	0.00	211.00	185.00	211.00	249.00	234.00	172.00	185.00	134.00	180.00	275.00	25.00	146.00	162.00	56.00	176.00
maker-tulip_contig_178_pilon_pilon-augustus-gene-0.69-mRNA-1	271.00	443.00	485.00	203.00	193.00	306.00	191.00	235.00	167.00	52.00	30.00	30.00	24.00	4.00	19.00	38.00	17.00	28.00
maker-tulip_contig_482_pilon_pilon-augustus-gene-3.27-mRNA-1	0.00	0.00	0.00	4.00	6.00	3.00	1.00	1.00	0.00	0.00	0.00	0.00	2.00	0.00	0.00	0.00	0.00	0.00
augustus_masked-tulip_contig_175_pilon_pilon-processed-gene-3.1-mRNA-1	0.00	0.00	0.00	0.00	0.00	0.00	0.00	0.00	0.00	0.00	0.00	0.00	0.00	0.00	0.00	0.00	0.00	0.00
maker-tulip_contig_583_pilon_pilon-augustus-gene-1.7-mRNA-1	0.00	0.00	0.00	0.00	0.00	0.00	0.00	0.00	0.00	0.00	0.00	0.00	0.00	0.00	0.00	0.00	0.00	0.00
maker-tulip_contig_716_pilon_pilon-augustus-gene-0.26-mRNA-1	43.00	57.00	60.00	72.00	74.00	69.00	38.00	17.00	23.00	66.00	45.00	46.00	259.00	40.00	206.00	58.00	13.00	60.00
augustus_masked-tulip_contig_474_pilon_pilon-processed-gene-5.2-mRNA-1	0.00	2.00	4.00	0.00	0.00	0.00	0.00	0.00	0.00	0.00	0.00	1.00	1.00	0.00	2.00	0.00	0.00	0.00
maker-tulip_contig_698_pilon_pilon-augustus-gene-2.30-mRNA-1	995.00	952.00	1083.00	687.00	557.00	674.00	282.00	256.00	204.00	430.00	457.00	439.00	1749.00	223.00	1494.00	1313.00	566.00	2349.00
maker-tulip_contig_159_pilon_pilon-augustus-gene-1.48-mRNA-1	0.00	0.00	0.00	0.00	0.00	0.00	0.00	0.00	0.00	0.00	0.00	0.00	0.00	0.00	0.00	0.00	0.00	0.00
maker-tulip_contig_338_pilon_pilon-augustus-gene-1.12-mRNA-1	0.00	4.00	1.00	150.00	188.00	150.00	19.00	18.00	13.00	6.00	1.00	4.00	34.00	3.00	14.00	35.00	13.00	25.00
augustus_masked-tulip_contig_894_pilon_pilon-processed-gene-0.0-mRNA-1	3.00	8.00	22.00	42.00	53.00	52.00	37.00	19.00	24.00	85.00	51.00	67.00	136.00	5.00	45.00	25.00	9.00	18.00
maker-tulip_contig_228_pilon_pilon-augustus-gene-1.93-mRNA-1	456.21	365.63	380.63	9.01	12.00	6.00	24.06	33.06	18.03	115.38	83.23	93.23	379.76	45.39	248.15	13.00	4.00	10.00
augustus_masked-tulip_contig_321_pilon_pilon-processed-gene-0.32-mRNA-1	0.00	0.00	0.00	0.00	0.00	0.00	0.00	1.00	0.00	0.00	0.00	0.00	0.00	0.00	0.00	0.00	0.00	1.74
maker-tulip_contig_745_pilon_pilon-augustus-gene-2.5-mRNA-1	4.00	0.00	2.00	1393.00	1645.00	1348.00	184.00	120.00	115.00	134.00	105.00	119.00	61.00	3.00	20.00	73.00	40.00	65.00
maker-tulip_contig_809_pilon_pilon-augustus-gene-3.41-mRNA-1	0.00	0.00	0.00	0.00	0.00	0.00	1.00	0.00	0.00	0.00	0.00	2.00	0.00	0.00	0.00	0.00	0.00	1.00
augustus_masked-tulip_contig_236_pilon_pilon-processed-gene-8.77-mRNA-1	1.00	0.00	0.00	2.00	0.00	1.00	1.00	0.00	0.00	0.00	0.00	0.00	1.00	0.00	0.00	158.00	101.00	153.00
augustus_masked-tulip_contig_827_pilon_pilon-processed-gene-0.10-mRNA-1	0.00	26.14	24.14	0.00	0.00	0.00	0.00	2.76	0.00	0.00	0.00	0.00	5.60	1.81	0.00	0.00	0.00	0.00
augustus_masked-tulip_contig_80_pilon_pilon-processed-gene-0.39-mRNA-1	14.00	21.00	36.00	60.00	60.00	105.00	41.00	190.00	38.00	20.00	27.00	21.00	44.00	10.00	8.00	17.00	3.00	12.00
maker-tulip_contig_378_pilon_pilon-augustus-gene-3.1-mRNA-1	3.00	3.00	4.00	1182.00	1357.00	1836.00	2877.00	2968.00	2235.00	1859.00	1165.00	1418.00	326.00	36.00	160.00	230.00	99.00	232.00
maker-tulip_contig_343_pilon_pilon-augustus-gene-0.9-mRNA-1	0.00	0.00	0.00	1.00	6.00	11.00	3.00	23.00	1.00	0.00	0.00	0.00	0.00	0.00	0.00	0.00	0.00	0.00
maker-tulip_contig_236_pilon_pilon-augustus-gene-4.57-mRNA-1	0.00	0.00	0.00	14.00	17.00	12.00	23.00	4.00	8.00	299.00	375.00	442.00	249.00	29.00	135.00	254.00	91.00	280.00
augustus_masked-tulip_contig_495_pilon_pilon-processed-gene-0.19-mRNA-1	141.00	24.00	113.00	55.00	51.00	38.00	68.00	46.00	57.00	74.00	77.00	77.00	40.00	5.00	32.00	22.00	14.00	38.00
maker-tulip_contig_80_pilon_pilon-augustus-gene-0.138-mRNA-1	0.00	0.00	0.00	3.00	0.00	0.00	0.00	0.00	0.00	0.00	0.00	0.00	0.00	0.00	0.00	28.00	24.00	18.00
maker-tulip_contig_33_pilon_pilon-augustus-gene-2.2-mRNA-1	8.00	18.00	15.00	165.00	110.00	156.00	206.00	109.00	133.00	126.00	64.00	85.00	5.00	0.00	2.00	10.00	2.00	7.00
maker-tulip_contig_634_pilon_pilon-augustus-gene-0.5-mRNA-1	0.00	0.00	0.00	0.00	0.00	0.00	0.00	0.00	0.00	0.00	0.00	0.00	0.00	0.00	1.00	669.00	292.00	552.00
maker-tulip_contig_523_pilon_pilon-augustus-gene-0.133-mRNA-1	568.00	265.00	355.00	189.00	279.00	250.00	354.00	391.00	233.00	81.00	62.00	70.00	317.00	38.00	220.00	26.00	19.00	45.00
augustus_masked-tulip_contig_666_pilon_pilon-processed-gene-1.0-mRNA-1	0.00	2.98	1.00	0.00	5.16	19.94	3.35	0.00	1.41	0.00	6.75	6.43	9.88	0.00	6.74	2.88	1.00	2.00
augustus_masked-tulip_contig_716_pilon_pilon-processed-gene-1.12-mRNA-1	0.00	0.00	0.00	0.00	0.00	0.00	0.00	0.00	0.00	0.00	0.00	0.00	0.00	0.00	0.00	1.00	0.00	0.00
maker-tulip_contig_143_pilon_pilon-augustus-gene-2.28-mRNA-1	212.00	176.00	204.00	159.00	191.00	191.00	183.00	160.00	156.00	100.00	71.00	105.00	309.00	37.00	171.00	49.00	27.00	68.00
maker-tulip_contig_414_pilon_pilon-augustus-gene-0.17-mRNA-1	0.00	0.00	0.00	0.00	4.00	3.00	1.47	0.00	0.00	0.01	0.00	0.00	1.84	0.00	0.00	0.00	0.00	0.00
maker-tulip_contig_224_pilon_pilon-augustus-gene-1.0-mRNA-1	0.00	0.00	0.00	1.00	2.00	1.00	0.00	0.00	0.00	0.00	0.00	0.00	0.00	0.00	0.00	2.00	0.00	0.00
augustus_masked-tulip_contig_208_pilon_pilon-processed-gene-1.36-mRNA-1	0.00	1.00	0.00	4.00	0.00	0.00	0.00	1.00	0.00	0.00	0.00	0.00	0.00	0.00	205.00	0.00	0.00	0.00
augustus_masked-tulip_contig_507_pilon_pilon-processed-gene-0.15-mRNA-1	175.75	67.96	157.38	28.26	48.84	43.00	81.27	62.73	35.85	1754.80	1276.76	1581.96	1302.55	302.99	1174.86	1172.81	671.76	1567.02
augustus_masked-tulip_contig_759_pilon_pilon-processed-gene-0.11-mRNA-1	233.00	117.00	189.00	73.00	67.00	70.00	90.00	71.00	56.00	66.00	55.00	46.00	191.00	25.00	166.00	33.00	20.00	23.00
maker-tulip_contig_845_pilon_pilon-augustus-gene-0.39-mRNA-1	12.00	12.00	25.00	73.00	105.00	79.00	51.00	39.00	39.00	114.00	58.00	77.00	112.00	20.00	76.00	37.00	9.00	48.00
maker-tulip_contig_669_pilon_pilon-augustus-gene-2.90-mRNA-1	9.00	8.00	7.00	372.00	852.00	588.00	1168.00	1735.00	521.00	1591.00	800.00	842.00	830.00	148.00	616.00	224.00	85.00	229.00
maker-tulip_contig_362_pilon_pilon-augustus-gene-0.34-mRNA-1	0.00	0.00	0.00	0.00	0.00	0.00	0.00	0.00	0.00	0.00	0.00	0.00	0.00	0.00	0.00	14.00	7.00	5.00
augustus_masked-tulip_contig_132_pilon_pilon-processed-gene-1.3-mRNA-1	4729.00	4561.00	4635.00	3977.00	4159.00	4061.00	2726.00	2179.00	1791.00	6097.00	4460.00	5588.00	20021.00	2684.00	12959.00	3411.00	1302.00	3453.00
augustus_masked-tulip_contig_85_pilon_pilon-processed-gene-0.3-mRNA-1	1.00	0.00	0.00	1.00	0.00	0.00	0.00	0.00	1.00	0.00	0.00	0.00	0.00	0.00	1.00	0.00	0.00	0.00
augustus_masked-tulip_contig_85_pilon_pilon-processed-gene-0.1-mRNA-1	131.12	86.57	118.83	20.00	19.00	22.00	28.00	9.00	17.00	115.00	91.00	98.00	97.00	12.00	65.00	63.00	23.00	55.00
augustus_masked-tulip_contig_586_pilon_pilon-processed-gene-3.33-mRNA-1	0.00	5.13	1.45	14.45	18.83	11.67	8.86	5.43	9.46	22.45	17.38	17.80	17.95	0.00	6.09	14.05	3.87	2.34
augustus_masked-tulip_contig_345_pilon_pilon-processed-gene-1.16-mRNA-1	0.00	0.00	0.00	1.00	1.00	0.00	0.00	0.00	0.00	0.00	0.00	0.00	0.00	0.00	1.00	0.00	0.00	0.00
maker-tulip_contig_555_pilon_pilon-augustus-gene-2.12-mRNA-1	3188.00	1650.00	2329.00	796.00	1047.00	968.00	1426.00	1369.00	863.00	602.00	481.00	568.00	3444.00	398.00	2196.00	187.00	78.00	180.00
augustus_masked-tulip_contig_2_pilon_pilon-processed-gene-7.8-mRNA-1	3.05	22.13	8.30	2.00	2.49	0.00	0.50	0.00	1.00	3.56	3.50	3.73	3.16	0.00	0.00	4.50	1.50	4.07
maker-tulip_contig_123_pilon_pilon-augustus-gene-0.2-mRNA-1	35.00	57.00	27.00	56.00	60.00	48.00	49.00	42.00	23.00	48.00	51.00	81.00	201.00	16.00	106.00	79.00	33.00	107.00
maker-tulip_contig_843_pilon_pilon-augustus-gene-1.6-mRNA-1	148.00	72.00	142.00	202.00	204.00	220.00	160.00	197.00	154.00	291.00	280.00	336.00	282.00	27.00	156.00	199.00	76.00	232.00
maker-tulip_contig_260_pilon_pilon-augustus-gene-0.10-mRNA-1	39.00	47.00	37.00	276.00	284.00	224.00	163.00	156.00	134.00	240.00	219.00	250.00	459.00	65.00	270.00	132.00	56.00	201.00
maker-tulip_contig_716_pilon_pilon-augustus-gene-1.77-mRNA-1	914.00	1042.00	885.00	1221.00	1237.00	1186.00	760.00	641.00	552.00	1321.00	1160.00	1371.00	2308.00	321.00	1407.00	625.00	304.00	736.00
maker-tulip_contig_773_pilon_pilon-augustus-gene-2.36-mRNA-1	149.00	227.00	151.00	40.00	35.00	49.00	34.00	41.00	18.00	99.00	65.00	66.00	170.00	25.00	116.00	57.00	13.00	50.00
augustus_masked-tulip_contig_402_pilon_pilon-processed-gene-2.15-mRNA-1	0.00	0.00	2.98	73.79	25.36	44.33	60.79	48.53	13.37	492.80	422.80	489.87	648.33	91.56	549.28	200.80	57.72	277.86
maker-tulip_contig_298_pilon_pilon-augustus-gene-0.28-mRNA-1	6.00	3.00	2.00	0.00	0.00	0.00	2.00	1.00	0.00	1.00	1.00	0.00	0.00	0.00	0.00	1.00	0.00	0.00
maker-tulip_contig_84_pilon_pilon-augustus-gene-0.18-mRNA-1	1.00	2.26	0.00	0.00	0.00	0.00	0.00	0.00	3.00	0.00	0.00	0.00	1.00	0.00	0.00	0.00	0.00	1.00
augustus_masked-tulip_contig_406_pilon_pilon-processed-gene-0.11-mRNA-1	0.00	0.00	0.00	0.00	0.00	0.00	0.00	0.00	0.00	0.00	0.00	0.00	0.00	0.00	0.00	0.00	0.00	0.00
maker-tulip_contig_271_pilon_pilon-augustus-gene-0.1-mRNA-1	0.00	0.00	0.00	0.00	0.00	0.00	0.00	0.00	0.00	0.00	0.00	0.00	1.00	0.00	0.00	0.00	0.00	0.00
maker-tulip_contig_691_pilon_pilon-augustus-gene-4.46-mRNA-1	0.00	0.00	0.00	0.00	0.00	0.00	5.00	0.00	0.00	46.00	44.00	22.00	5.00	0.00	1.00	5.00	2.00	5.00
augustus_masked-tulip_contig_628_pilon_pilon-processed-gene-4.15-mRNA-1	93.05	0.00	33.91	0.00	0.00	0.00	0.00	0.00	0.00	38.14	31.06	23.99	44.54	12.52	80.60	0.00	0.00	0.00
maker-tulip_contig_799_pilon_pilon-augustus-gene-0.6-mRNA-1	1272.00	901.00	1067.00	903.00	887.00	991.00	1247.00	1083.00	816.00	474.00	339.00	430.00	971.00	144.00	769.00	228.00	99.00	224.00
augustus_masked-tulip_contig_812_pilon_pilon-processed-gene-1.3-mRNA-1	0.00	0.00	0.00	0.00	0.00	0.00	0.00	0.00	0.00	0.00	0.00	0.00	0.00	0.00	0.00	0.00	0.00	0.00
augustus_masked-tulip_contig_673_pilon_pilon-processed-gene-0.15-mRNA-1	0.00	0.00	0.00	0.00	0.00	0.00	1.00	0.00	1.00	0.00	0.00	1.00	2.00	4.00	3.00	0.00	0.00	0.00
augustus_masked-tulip_contig_362_pilon_pilon-processed-gene-9.6-mRNA-1	0.00	0.00	0.00	208.00	251.00	173.00	37.00	20.00	21.00	17.00	6.00	15.00	32.00	5.00	15.00	46.00	14.00	33.00
maker-tulip_contig_191_pilon_pilon-augustus-gene-0.74-mRNA-1	0.00	0.00	0.00	0.00	0.00	2.00	46.00	7.00	31.00	0.00	1.00	1.00	1.00	0.00	0.00	0.00	0.00	1.00
maker-tulip_contig_934_pilon_pilon-augustus-gene-1.16-mRNA-1	3.00	3.00	0.00	0.00	0.00	1.00	0.00	0.00	0.00	4.00	3.00	3.00	13.00	3.00	9.00	1692.00	1404.00	2215.00
maker-tulip_contig_327_pilon_pilon-augustus-gene-10.51-mRNA-1	68.00	124.00	94.00	474.00	514.00	496.00	425.00	423.00	255.00	145.00	120.00	139.00	1025.00	100.00	610.00	837.00	210.00	838.00
augustus_masked-tulip_contig_238_pilon_pilon-processed-gene-0.9-mRNA-1	9.00	2.00	2.00	222.00	182.00	227.00	237.00	186.00	170.00	75.00	79.00	70.00	279.00	40.00	161.00	221.00	81.00	317.00
maker-tulip_contig_327_pilon_pilon-augustus-gene-10.39-mRNA-1	2727.00	1974.00	2573.00	2445.00	2602.00	2568.00	2207.00	1831.00	1439.00	1850.00	1326.00	1765.00	5506.00	688.00	3023.00	1454.00	579.00	1649.00
augustus_masked-tulip_contig_236_pilon_pilon-processed-gene-7.8-mRNA-1	276.00	212.00	203.00	134.00	134.00	180.00	132.00	111.00	105.00	112.00	95.00	99.00	607.00	86.00	485.00	86.00	42.00	73.00
augustus_masked-tulip_contig_505_pilon_pilon-processed-gene-1.22-mRNA-1	27.00	5.00	29.00	102.00	94.00	62.00	43.00	39.00	23.00	88.00	55.00	89.00	185.00	55.00	262.00	111.00	94.00	254.00
augustus_masked-tulip_contig_224_pilon_pilon-processed-gene-2.12-mRNA-1	0.00	1.00	0.00	0.00	5.00	5.00	32.00	62.00	54.00	10.00	4.00	18.00	13.00	0.00	4.00	10.00	11.00	7.00
maker-tulip_contig_112_pilon_pilon-augustus-gene-3.102-mRNA-1	113.00	83.00	74.00	36.00	33.00	46.00	26.00	30.00	24.00	45.00	46.00	38.00	82.00	18.00	81.00	34.00	22.00	25.00
augustus_masked-tulip_contig_303_pilon_pilon-processed-gene-0.16-mRNA-1	133.27	134.40	124.52	64.91	68.43	104.01	180.19	205.84	117.79	14.46	12.16	13.22	143.88	21.05	116.05	72.08	32.92	91.86
maker-tulip_contig_632_pilon_pilon-augustus-gene-3.57-mRNA-1	0.00	0.00	0.00	0.00	0.00	0.00	0.00	0.00	0.00	0.00	0.00	0.00	0.00	1.00	2.00	0.00	2.00	3.00
maker-tulip_contig_333_pilon_pilon-augustus-gene-1.16-mRNA-1	68.00	84.00	72.00	39.00	37.00	33.00	44.00	48.00	32.00	28.00	17.00	20.00	101.00	15.00	74.00	13.00	9.00	14.00
maker-tulip_contig_396_pilon_pilon-augustus-gene-0.38-mRNA-1	1.00	0.00	0.00	0.00	0.00	0.00	0.00	0.00	0.00	0.00	0.00	0.00	1.00	0.00	1.00	0.00	0.00	0.00
augustus_masked-tulip_contig_777_pilon_pilon-processed-gene-0.9-mRNA-1	4.00	2.00	2.00	661.00	487.00	542.00	682.00	396.00	412.00	24.00	13.00	12.00	961.00	129.00	713.00	783.00	289.00	876.00
maker-tulip_contig_704_pilon_pilon-augustus-gene-1.5-mRNA-1	891.00	797.00	927.00	123.00	178.00	178.00	150.00	265.00	115.00	242.00	218.00	250.00	809.00	111.00	592.00	97.00	53.00	96.00
maker-tulip_contig_177_pilon_pilon-augustus-gene-1.6-mRNA-1	0.00	3.00	0.00	2.00	5.00	3.00	0.00	0.00	0.00	1.00	5.00	2.00	5.00	0.00	0.00	0.00	0.00	0.00
maker-tulip_contig_407_pilon_pilon-augustus-gene-8.75-mRNA-1	21.00	14.00	11.00	325.00	280.00	322.00	150.00	157.00	115.00	170.00	114.00	150.00	505.00	67.00	262.00	153.00	65.00	230.00
maker-tulip_contig_333_pilon_pilon-augustus-gene-2.42-mRNA-1	649.00	568.00	665.00	74.00	93.00	117.00	113.00	71.00	68.00	171.00	122.00	172.00	216.00	37.00	125.00	86.00	42.00	83.00
augustus_masked-tulip_contig_85_pilon_pilon-processed-gene-1.12-mRNA-1	78.00	59.00	50.00	538.00	473.00	527.00	347.00	264.00	185.00	265.00	204.00	269.00	488.00	58.00	337.00	451.00	117.00	534.00
augustus_masked-tulip_contig_632_pilon_pilon-processed-gene-1.14-mRNA-1	0.00	0.00	0.00	0.00	0.00	0.00	0.00	0.00	0.00	0.00	0.00	0.00	0.00	0.00	0.00	0.00	0.00	0.00
augustus_masked-tulip_contig_603_pilon_pilon-processed-gene-1.58-mRNA-1	0.00	0.00	0.00	0.33	0.00	0.00	0.00	0.00	0.33	0.00	0.00	0.00	0.00	0.00	0.67	0.00	0.00	0.00
augustus_masked-tulip_contig_586_pilon_pilon-processed-gene-5.14-mRNA-1	48.00	54.00	43.00	1340.00	1546.00	1312.00	156.00	112.00	117.00	39.00	21.00	27.00	57.00	9.00	46.00	45.00	28.00	46.00
maker-tulip_contig_317_pilon_pilon-augustus-gene-1.16-mRNA-1	0.00	0.00	0.00	0.00	0.00	0.00	0.00	0.00	0.00	0.00	0.00	0.00	0.00	0.00	0.00	0.00	0.00	0.00
augustus_masked-tulip_contig_560_pilon_pilon-processed-gene-2.3-mRNA-1	33.00	9.00	38.00	12.00	29.00	23.00	24.00	21.00	14.00	39.00	36.00	56.00	144.00	22.00	120.00	19.00	12.00	22.00
maker-tulip_contig_2_pilon_pilon-augustus-gene-6.14-mRNA-1	0.00	0.00	0.00	0.00	0.00	3.00	0.00	0.00	0.00	5.00	11.00	6.00	3.00	0.00	2.00	3.00	2.00	6.00
maker-tulip_contig_125_pilon_pilon-augustus-gene-0.314-mRNA-1	282.22	340.54	351.46	444.36	434.10	378.16	367.15	164.55	197.78	347.41	363.40	364.80	2421.01	310.53	1464.78	774.88	257.00	813.84
augustus_masked-tulip_contig_702_pilon_pilon-processed-gene-0.25-mRNA-1	2.00	0.00	0.00	100.00	109.00	126.00	214.00	187.00	164.00	58.00	58.00	57.00	22.00	2.00	28.00	25.00	13.00	38.00
augustus_masked-tulip_contig_4_pilon_pilon-processed-gene-1.35-mRNA-1	0.00	0.00	0.00	0.00	0.00	0.00	0.00	0.00	0.00	0.00	0.00	0.00	0.00	0.00	0.00	5.00	5.00	12.00
maker-tulip_contig_529_pilon_pilon-augustus-gene-1.45-mRNA-1	244.92	327.38	290.28	47.87	53.16	48.50	88.52	78.95	60.43	126.55	116.95	107.32	626.72	59.19	405.91	65.11	22.53	38.76
maker-tulip_contig_689_pilon_pilon-augustus-gene-4.25-mRNA-1	6724.00	5446.00	5559.00	2636.00	2892.00	2950.00	2867.00	3026.00	1706.00	3028.00	2309.00	2711.00	4466.00	615.00	2865.00	1772.00	559.00	1491.00
maker-tulip_contig_626_pilon_pilon-augustus-gene-1.32-mRNA-1	1.00	3.00	3.00	48.00	57.00	46.00	107.00	76.00	62.00	4.00	0.00	1.00	1040.00	73.00	388.00	448.00	162.00	373.00
augustus_masked-tulip_contig_715_pilon_pilon-processed-gene-5.18-mRNA-1	38.00	123.00	58.00	1159.00	1142.00	1117.00	233.00	212.00	163.00	267.00	255.00	260.00	347.00	43.00	222.00	248.00	125.00	309.00
maker-tulip_contig_4_pilon_pilon-augustus-gene-1.13-mRNA-1	733.00	655.00	675.00	300.00	312.00	266.00	170.00	100.00	121.00	575.00	446.00	558.00	1363.00	158.00	880.00	378.00	104.00	266.00
augustus_masked-tulip_contig_58_pilon_pilon-processed-gene-4.74-mRNA-1	4.00	0.00	0.00	3.00	5.00	6.00	1.00	0.00	3.00	6.00	4.00	7.00	15.00	4.00	5.00	12.00	1.00	6.00
augustus_masked-tulip_contig_807_pilon_pilon-processed-gene-1.76-mRNA-1	0.00	0.00	0.00	0.00	0.00	0.00	0.00	0.00	0.00	0.00	0.00	0.00	0.00	0.00	0.00	0.00	0.00	0.00
maker-tulip_contig_570_pilon_pilon-augustus-gene-0.3-mRNA-1	335.00	409.00	269.00	1279.00	1315.00	1419.00	1224.00	1071.00	660.00	681.00	481.00	591.00	2351.00	295.00	1350.00	1186.00	297.00	941.00
maker-tulip_contig_770_pilon_pilon-augustus-gene-0.23-mRNA-1	0.00	0.00	0.00	0.00	1.00	1.00	0.00	2.00	0.00	1.00	1.00	0.00	1.00	1.00	0.00	0.00	0.00	1.00
augustus_masked-tulip_contig_81_pilon_pilon-processed-gene-0.14-mRNA-1	2.00	2.00	0.00	0.00	0.00	0.00	0.00	2.00	0.00	1.00	0.00	0.00	2.00	1.00	0.00	131.00	80.00	159.00
augustus_masked-tulip_contig_315_pilon_pilon-processed-gene-0.15-mRNA-1	5.71	28.34	15.00	6.85	7.61	4.16	7.99	6.48	1.89	6.68	2.22	0.00	24.62	0.00	2.71	4.93	0.00	7.20
maker-tulip_contig_829_pilon_pilon-augustus-gene-3.13-mRNA-1	23.00	17.00	7.00	25.00	21.00	15.00	18.00	28.00	15.00	51.00	29.00	19.00	56.00	6.00	29.00	19.00	16.00	26.00
augustus_masked-tulip_contig_334_pilon_pilon-processed-gene-4.5-mRNA-1	1.00	3.00	4.00	6588.00	9093.00	8500.00	2258.00	6661.00	1518.00	4.00	1.00	4.00	16.00	0.00	6.00	0.00	0.00	0.00
maker-tulip_contig_484_pilon_pilon-augustus-gene-0.2-mRNA-1	883.00	672.00	649.00	456.00	558.00	498.00	184.00	173.00	111.00	468.00	415.00	511.00	802.00	87.00	571.00	348.00	153.00	375.00
maker-tulip_contig_635_pilon_pilon-augustus-gene-0.10-mRNA-1	0.00	0.00	0.00	1.00	0.00	0.00	0.00	0.00	0.00	0.00	0.00	0.00	1.00	0.00	0.00	0.00	0.00	0.00
augustus_masked-tulip_contig_490_pilon_pilon-processed-gene-0.8-mRNA-1	0.00	1.00	0.00	3.00	0.00	0.00	0.00	0.00	0.00	0.00	0.00	0.00	0.00	0.00	0.00	0.00	0.00	0.00
maker-tulip_contig_819_pilon_pilon-augustus-gene-0.64-mRNA-1	24284.00	26244.00	25304.00	10819.00	12177.00	12443.00	14321.00	14616.00	7762.00	9720.00	7079.00	8021.00	11109.00	1731.00	8230.00	4001.00	1181.00	2886.00
maker-tulip_contig_181_pilon_pilon-augustus-gene-1.21-mRNA-1	160.00	132.00	165.00	80.00	119.00	91.00	67.00	93.00	75.00	212.00	190.00	265.00	1960.00	259.00	1321.00	61.00	33.00	63.00
maker-tulip_contig_907_pilon_pilon-augustus-gene-3.17-mRNA-1	21556.00	18028.00	20243.00	10030.00	11952.00	10905.00	15229.00	15958.00	9351.00	14384.00	11235.00	12746.00	15790.00	2388.00	10211.00	2962.00	1344.00	3521.00
maker-tulip_contig_33_pilon_pilon-augustus-gene-1.53-mRNA-1	865.00	702.00	787.00	68.00	122.00	112.00	124.00	154.00	117.00	193.00	97.00	163.00	316.00	56.00	168.00	73.00	22.00	39.00
maker-tulip_contig_837_pilon_pilon-augustus-gene-7.59-mRNA-1	132.00	69.00	145.00	283.00	251.00	262.00	241.00	184.00	150.00	410.00	383.00	474.00	882.00	108.00	485.00	201.00	70.00	214.00
maker-tulip_contig_55_pilon_pilon-augustus-gene-1.49-mRNA-1	0.00	2.00	1.00	73.00	94.00	57.00	122.00	86.00	43.00	49.00	24.00	24.00	10.00	2.00	12.00	24.00	6.00	15.00
augustus_masked-tulip_contig_597_pilon_pilon-processed-gene-4.50-mRNA-1	11.00	0.00	4.00	6.00	3.00	9.00	2.00	7.00	3.00	457.00	271.00	434.00	16.00	2.00	6.00	25.00	9.00	40.00
augustus_masked-tulip_contig_3_pilon_pilon-processed-gene-4.21-mRNA-1	4.00	11.00	2.00	34.00	26.00	14.00	12.00	16.00	10.00	38.00	28.00	39.00	97.00	11.00	39.00	23.00	15.00	35.00
augustus_masked-tulip_contig_168_pilon_pilon-processed-gene-0.95-mRNA-1	147.00	136.00	93.00	71.00	74.00	74.00	100.00	88.00	81.00	174.00	160.00	126.00	855.00	121.00	558.00	131.00	63.00	139.00
maker-tulip_contig_504_pilon_pilon-augustus-gene-2.19-mRNA-1	3496.00	2059.00	3034.00	502.00	629.00	617.00	510.00	748.00	449.00	1593.00	1273.00	1478.00	2241.00	281.00	1284.00	479.00	207.00	403.00
maker-tulip_contig_616_pilon_pilon-augustus-gene-0.31-mRNA-1	3056.00	4085.00	3496.00	2030.00	2215.00	2209.00	3458.00	3908.00	1956.00	2162.00	1077.00	1174.00	2034.00	360.00	1595.00	639.00	284.00	664.00
maker-tulip_contig_586_pilon_pilon-augustus-gene-8.3-mRNA-1	0.00	0.00	0.00	1.00	0.00	0.00	0.00	0.00	0.00	0.00	0.00	0.00	0.00	0.00	0.00	0.00	0.00	0.00
augustus_masked-tulip_contig_373_pilon_pilon-processed-gene-0.3-mRNA-1	0.00	0.00	0.00	2.89	3.37	0.00	0.00	0.00	2.00	3.39	0.00	1.00	3.53	1.00	0.00	1.00	0.00	2.25
augustus_masked-tulip_contig_916_pilon_pilon-processed-gene-0.34-mRNA-1	519.00	440.00	514.00	176.00	163.00	146.00	116.00	78.00	77.00	157.00	156.00	184.00	894.00	128.00	607.00	97.00	33.00	97.00
maker-tulip_contig_504_pilon_pilon-augustus-gene-3.9-mRNA-1	1.00	0.00	4.00	0.00	0.00	1.00	0.00	2.00	0.00	0.00	0.00	0.00	0.00	0.00	0.00	7.00	3.00	6.00
maker-tulip_contig_340_pilon_pilon-augustus-gene-0.26-mRNA-1	61.00	54.00	72.00	1440.00	1681.00	1437.00	174.00	163.00	150.00	26.00	34.00	43.00	49.00	4.00	25.00	62.00	9.00	27.00
augustus_masked-tulip_contig_479_pilon_pilon-processed-gene-1.5-mRNA-1	1.00	2.00	4.00	43.00	26.00	14.00	46.00	29.00	3.00	54.00	35.00	5.00	49.00	3.00	7.00	29.00	15.00	12.00
maker-tulip_contig_839_pilon_pilon-augustus-gene-1.48-mRNA-1	0.00	0.00	0.00	385.00	656.00	706.00	150.00	552.00	54.00	1.00	0.00	1.00	3.00	0.00	3.00	5.00	1.00	2.00
augustus_masked-tulip_contig_24_pilon_pilon-processed-gene-0.26-mRNA-1	0.00	0.00	0.00	0.00	0.00	1.00	0.00	2.00	1.00	0.00	0.00	0.00	3.00	0.00	0.00	0.00	0.00	0.00
maker-tulip_contig_356_pilon_pilon-augustus-gene-0.0-mRNA-1	0.00	0.00	0.00	0.00	0.00	0.00	0.00	0.00	0.00	0.00	0.00	0.00	1.00	0.00	0.00	0.00	0.00	0.00
maker-tulip_contig_777_pilon_pilon-augustus-gene-1.64-mRNA-1	10.98	23.56	17.52	13.74	14.62	9.66	9.65	14.79	4.51	12.09	17.03	16.78	14.53	2.27	1.54	16.44	3.77	9.42
maker-tulip_contig_168_pilon_pilon-augustus-gene-0.17-mRNA-1	15.00	10.00	30.00	73.00	85.00	55.00	47.00	43.00	24.00	173.00	141.00	138.00	163.00	23.00	82.00	98.00	36.00	121.00
maker-tulip_contig_773_pilon_pilon-augustus-gene-3.35-mRNA-1	549.00	267.00	601.00	3315.00	2479.00	2720.00	2209.00	2207.00	1197.00	716.00	687.00	740.00	3685.00	358.00	1392.00	3680.00	819.00	2438.00
maker-tulip_contig_387_pilon_pilon-augustus-gene-1.87-mRNA-1	384.00	417.00	386.00	522.00	433.00	520.00	294.00	161.00	182.00	288.00	301.00	306.00	747.00	80.00	342.00	558.00	219.00	438.00
maker-tulip_contig_204_pilon_pilon-augustus-gene-1.10-mRNA-1	0.00	0.00	0.00	0.00	0.00	0.00	0.00	2.00	0.00	0.00	0.00	0.00	0.00	0.00	1.00	1.00	0.00	1.00
augustus_masked-tulip_contig_205_pilon_pilon-processed-gene-0.14-mRNA-1	1.00	0.00	7.00	3.00	12.00	8.00	4.00	3.00	3.00	24.00	10.00	22.00	16.00	3.00	2.00	8.00	2.00	9.00
maker-tulip_contig_633_pilon_pilon-augustus-gene-0.25-mRNA-1	14.00	6.00	13.00	17.00	22.00	12.00	7.00	8.00	11.00	16.00	19.00	16.00	65.00	10.00	30.00	14.00	6.00	17.00
maker-tulip_contig_387_pilon_pilon-augustus-gene-1.93-mRNA-1	0.00	4.00	0.00	0.00	5.00	3.00	0.00	0.00	0.00	0.00	0.00	0.00	2.00	0.00	2.00	4.00	1.00	1.00
augustus_masked-tulip_contig_571_pilon_pilon-processed-gene-0.1-mRNA-1	32.00	25.00	46.00	402.00	360.00	435.00	232.00	154.00	128.00	163.00	97.00	92.00	264.00	44.00	142.00	40.00	21.00	71.00
augustus_masked-tulip_contig_77_pilon_pilon-processed-gene-1.2-mRNA-1	3.00	0.00	0.00	0.00	1.00	5.00	4.00	0.00	0.00	3.00	0.00	0.00	15.00	1.00	4.00	2.00	0.00	6.00
maker-tulip_contig_633_pilon_pilon-augustus-gene-0.80-mRNA-1	105.00	177.00	80.00	244.00	199.00	215.00	68.00	42.00	40.00	1220.00	549.00	1018.00	1914.00	260.00	1268.00	265.00	67.00	245.00
maker-tulip_contig_620_pilon_pilon-augustus-gene-2.12-mRNA-1	0.00	0.00	0.00	0.00	2.00	1.00	0.00	5.00	3.00	0.00	0.00	4.00	7.00	0.00	3.00	0.00	0.00	0.00
maker-tulip_contig_318_pilon_pilon-augustus-gene-0.34-mRNA-1	248.00	231.00	234.00	1366.00	1449.00	1509.00	996.00	1006.00	616.00	399.00	326.00	340.00	2186.00	240.00	1036.00	2215.00	470.00	1660.00
augustus_masked-tulip_contig_667_pilon_pilon-processed-gene-0.199-mRNA-1	13.00	27.00	34.00	27.00	32.00	13.00	6.00	10.00	4.00	64.00	27.00	35.00	56.00	8.00	51.00	35.00	19.00	20.00
maker-tulip_contig_716_pilon_pilon-augustus-gene-1.33-mRNA-1	346.00	328.00	346.00	184.00	185.00	181.00	123.00	114.00	88.00	289.00	260.00	219.00	773.00	104.00	458.00	166.00	82.00	185.00
maker-tulip_contig_121_pilon_pilon-augustus-gene-4.49-mRNA-1	0.00	0.00	0.00	9.00	17.00	19.00	10.00	41.00	22.00	0.00	0.00	0.00	0.00	0.00	0.00	0.00	0.00	0.00
maker-tulip_contig_247_pilon_pilon-augustus-gene-1.58-mRNA-1	2.00	2.00	6.00	13.00	6.00	4.00	11.00	12.00	2.00	11.00	5.00	5.00	6.00	1.00	4.00	6.00	4.00	6.00
augustus_masked-tulip_contig_381_pilon_pilon-processed-gene-0.6-mRNA-1	0.00	0.00	0.00	0.00	0.00	0.00	0.00	0.00	0.00	0.00	1.07	0.00	0.00	0.00	0.00	0.00	0.00	0.00
maker-tulip_contig_226_pilon_pilon-augustus-gene-0.4-mRNA-1	0.00	0.00	0.00	6.00	1.00	5.00	0.00	1.00	1.00	0.00	0.00	0.00	2.00	2.00	2.00	4.00	7.00	7.00
augustus_masked-tulip_contig_234_pilon_pilon-processed-gene-0.37-mRNA-1	1167.00	691.00	895.00	393.00	497.00	479.00	702.00	750.00	468.00	212.00	183.00	174.00	605.00	73.00	398.00	64.00	22.00	55.00
augustus_masked-tulip_contig_298_pilon_pilon-processed-gene-0.18-mRNA-1	0.00	0.00	0.00	0.00	0.00	0.00	0.00	0.00	0.00	0.00	0.00	0.00	0.00	0.00	0.00	0.00	0.00	0.00
maker-tulip_contig_506_pilon_pilon-augustus-gene-1.140-mRNA-1	300.00	256.00	249.00	277.00	261.00	244.00	229.00	144.00	125.00	280.00	223.00	293.00	731.00	101.00	475.00	208.00	90.00	217.00
maker-tulip_contig_468_pilon_pilon-augustus-gene-2.27-mRNA-1	277.00	161.00	211.00	278.00	299.00	270.00	176.00	162.00	154.00	339.00	365.00	361.00	525.00	70.00	299.00	296.00	91.00	300.00
maker-tulip_contig_406_pilon_pilon-augustus-gene-0.23-mRNA-1	130.00	99.00	105.00	152.00	165.00	139.00	116.00	122.00	103.00	215.00	144.00	154.00	365.00	41.00	178.00	159.00	65.00	161.00
augustus_masked-tulip_contig_43_pilon_pilon-processed-gene-0.126-mRNA-1	0.00	0.00	0.00	0.00	3.00	4.00	3.00	1.00	2.00	4.00	0.00	0.00	0.00	0.00	0.00	25.00	6.00	20.00
maker-tulip_contig_479_pilon_pilon-augustus-gene-3.53-mRNA-1	3.00	6.00	2.00	76.00	62.00	244.00	7435.00	7972.00	4977.00	106.00	238.00	162.00	3.00	0.00	0.00	0.00	0.00	0.00
augustus_masked-tulip_contig_426_pilon_pilon-processed-gene-1.16-mRNA-1	7.03	0.00	0.00	0.00	0.02	1.08	1.97	0.00	3.88	0.00	0.00	0.00	1.96	0.47	3.08	7.55	0.00	0.00
maker-tulip_contig_192_pilon_pilon-augustus-gene-1.171-mRNA-1	777.00	1033.00	1126.00	196.00	260.00	278.00	440.00	339.00	254.00	965.00	822.00	902.00	840.00	102.00	557.00	640.00	156.00	421.00
augustus_masked-tulip_contig_841_pilon_pilon-processed-gene-0.127-mRNA-1	89.00	87.00	77.00	57.00	51.00	48.00	34.00	34.00	23.00	95.00	67.00	72.00	288.00	55.00	204.00	47.00	22.00	32.00
maker-tulip_contig_668_pilon_pilon-augustus-gene-0.8-mRNA-1	1077.00	1099.00	1120.00	426.00	406.00	438.00	355.00	321.00	245.00	851.00	1032.00	1023.00	958.00	113.00	594.00	430.00	200.00	502.00
maker-tulip_contig_47_pilon_pilon-augustus-gene-0.22-mRNA-1	19.00	22.00	49.00	17.00	23.00	20.00	42.00	15.00	19.00	60.00	55.00	51.00	59.00	7.00	45.00	32.00	8.00	19.00
augustus_masked-tulip_contig_34_pilon_pilon-processed-gene-0.14-mRNA-1	0.00	0.00	0.00	11.00	9.90	9.00	5.00	19.00	3.00	0.00	0.00	2.00	0.00	0.00	0.00	1.00	0.00	0.00
maker-tulip_contig_276_pilon_pilon-augustus-gene-2.8-mRNA-1	10.00	2.00	5.00	37.00	24.00	26.00	12.00	22.00	7.00	16.00	13.00	12.00	26.00	8.00	28.00	7.00	5.00	18.00
maker-tulip_contig_236_pilon_pilon-augustus-gene-0.34-mRNA-1	4.00	0.00	5.00	23.00	26.00	16.00	3.00	1.00	3.00	12.00	9.00	6.00	10.00	0.00	4.00	6.00	1.00	7.00
maker-tulip_contig_332_pilon_pilon-augustus-gene-0.22-mRNA-1	3.00	0.00	0.00	0.00	0.00	0.00	0.00	0.00	0.00	0.00	0.00	0.00	1.72	0.00	5.64	0.00	0.00	0.00
maker-tulip_contig_907_pilon_pilon-augustus-gene-5.0-mRNA-1	45.00	32.00	40.00	14.00	17.00	10.00	2.00	6.00	4.00	27.00	12.00	21.00	34.00	13.00	40.00	1.00	2.00	2.00
augustus_masked-tulip_contig_196_pilon_pilon-processed-gene-4.20-mRNA-1	0.00	0.00	0.00	0.00	0.00	0.00	0.00	0.00	0.00	0.00	0.00	0.00	0.00	0.00	0.00	0.00	0.00	0.00
augustus_masked-tulip_contig_272_pilon_pilon-processed-gene-4.84-mRNA-1	0.00	0.00	0.00	36.00	15.00	31.00	9.00	6.00	3.00	0.00	0.00	0.00	5.00	0.00	0.00	8.00	1.00	6.00
maker-tulip_contig_343_pilon_pilon-augustus-gene-0.5-mRNA-1	2.00	0.00	0.00	3.00	3.00	6.00	5.00	2.00	0.00	0.00	0.00	0.00	1.00	0.00	3.00	0.00	1.00	3.00
maker-tulip_contig_654_pilon_pilon-augustus-gene-1.129-mRNA-1	0.00	0.00	2.00	8.00	10.00	4.00	7.00	6.00	4.00	4.00	1.00	4.00	9.00	4.00	6.00	6.00	1.00	8.00
maker-tulip_contig_550_pilon_pilon-augustus-gene-0.17-mRNA-1	2.00	3.00	1.00	311.00	338.00	259.00	52.00	51.00	31.00	10.00	40.00	50.00	24.00	4.00	9.00	65.00	22.00	74.00
augustus_masked-tulip_contig_42_pilon_pilon-processed-gene-1.76-mRNA-1	187.00	196.00	189.00	338.00	354.00	405.00	325.00	290.00	205.00	71.00	58.00	46.00	2191.00	208.00	978.00	2001.00	290.00	1830.00
maker-tulip_contig_275_pilon_pilon-augustus-gene-0.10-mRNA-1	9.92	9.27	22.27	0.00	1.09	1.66	1.41	1.89	1.21	9.69	1.72	8.63	9.84	0.00	5.52	1.26	1.17	1.39
maker-tulip_contig_531_pilon_pilon-augustus-gene-7.17-mRNA-1	0.00	0.00	0.00	0.00	0.00	1.00	0.00	0.00	0.00	0.00	0.00	0.00	0.00	0.00	0.00	0.00	0.00	1.00
maker-tulip_contig_556_pilon_pilon-augustus-gene-0.6-mRNA-1	1.00	0.00	1.00	17.00	11.00	8.00	0.00	2.00	1.00	4.00	0.00	0.00	21.00	1.00	7.00	8.00	3.00	6.00
maker-tulip_contig_807_pilon_pilon-augustus-gene-1.44-mRNA-1	16.00	13.00	21.00	39.00	42.00	39.00	19.00	20.00	18.00	71.00	63.00	55.00	152.00	26.00	87.00	54.00	20.00	57.00
maker-tulip_contig_356_pilon_pilon-augustus-gene-1.47-mRNA-1	25.00	17.00	12.00	15.00	26.00	17.00	22.00	15.00	10.00	53.00	51.00	37.00	76.00	8.00	45.00	19.00	11.00	23.00
maker-tulip_contig_307_pilon_pilon-augustus-gene-1.145-mRNA-1	23.00	14.00	17.00	23.00	24.00	25.00	20.00	25.00	13.00	43.00	39.00	43.00	138.00	10.00	70.00	15.00	12.00	13.00
maker-tulip_contig_806_pilon_pilon-augustus-gene-2.31-mRNA-1	405.00	303.00	345.00	3752.00	3596.00	3997.00	2113.00	1876.00	1559.00	208.00	178.00	181.00	2779.00	316.00	3101.00	2445.00	994.00	3423.00
augustus_masked-tulip_contig_584_pilon_pilon-processed-gene-2.46-mRNA-1	4.00	7.00	6.00	14.00	8.00	12.00	6.00	8.00	4.00	26.00	13.00	14.00	40.00	12.00	32.00	11.00	7.00	15.00
augustus_masked-tulip_contig_807_pilon_pilon-processed-gene-1.52-mRNA-1	0.00	0.00	1.00	0.00	0.00	1.00	0.00	0.00	1.00	0.00	1.00	0.00	1.00	0.00	1.00	0.00	0.00	0.00
maker-tulip_contig_674_pilon_pilon-augustus-gene-0.41-mRNA-1	468.00	296.00	444.00	182.00	163.00	162.00	181.00	138.00	109.00	304.00	218.00	275.00	566.00	52.00	316.00	226.00	74.00	160.00
maker-tulip_contig_302_pilon_pilon-augustus-gene-0.0-mRNA-1	0.00	3.00	3.00	0.00	0.00	2.00	1.00	3.00	1.00	6.00	0.00	7.00	1.00	0.00	0.00	4.00	3.00	0.00
augustus_masked-tulip_contig_2_pilon_pilon-processed-gene-6.10-mRNA-1	9.00	10.00	8.00	45.00	36.00	31.00	19.00	11.00	10.00	59.00	43.00	79.00	58.00	4.00	30.00	27.00	9.00	47.00
augustus_masked-tulip_contig_639_pilon_pilon-processed-gene-0.30-mRNA-1	0.00	0.00	0.00	0.00	0.00	0.00	0.00	0.00	0.00	0.00	0.00	0.00	0.00	0.00	0.00	0.00	0.00	0.00
augustus_masked-tulip_contig_228_pilon_pilon-processed-gene-0.4-mRNA-1	0.00	0.00	0.00	0.00	1.00	0.00	0.00	0.00	0.00	0.00	0.00	0.00	0.00	0.00	0.00	1.00	0.00	0.00
augustus_masked-tulip_contig_714_pilon_pilon-processed-gene-0.101-mRNA-1	0.00	3.00	0.00	1.00	1.00	1.00	24.00	42.00	10.00	371.00	108.00	144.00	68.00	5.00	74.00	109.00	34.00	79.00
augustus_masked-tulip_contig_474_pilon_pilon-processed-gene-5.5-mRNA-1	374.00	230.00	264.00	101.00	108.00	126.00	70.00	59.00	32.00	249.00	160.00	196.00	157.00	30.00	116.00	57.00	29.00	101.00
maker-tulip_contig_872_pilon_pilon-augustus-gene-0.80-mRNA-1	10.00	2.00	6.00	53.00	41.00	48.00	68.00	95.00	39.00	4.00	12.00	9.00	32.00	5.00	9.00	20.00	5.00	19.00
maker-tulip_contig_80_pilon_pilon-augustus-gene-0.144-mRNA-1	6.00	17.00	12.00	28.00	25.00	37.00	33.00	32.00	14.00	14.00	6.00	11.00	48.00	9.00	59.00	79.00	27.00	66.00
augustus_masked-tulip_contig_584_pilon_pilon-processed-gene-3.74-mRNA-1	1892.00	1947.00	2050.00	20.00	37.00	22.00	87.00	162.00	105.00	566.00	469.00	583.00	1692.00	256.00	1173.00	23.00	19.00	19.00
augustus_masked-tulip_contig_732_pilon_pilon-processed-gene-1.2-mRNA-1	33.00	18.00	27.00	9.00	13.00	15.00	11.00	7.00	2.00	10.00	9.00	7.00	16.00	2.00	14.00	1.00	1.00	2.00
maker-tulip_contig_583_pilon_pilon-augustus-gene-2.51-mRNA-1	0.00	0.00	0.00	0.00	2.11	0.00	0.00	0.00	1.12	0.00	3.85	0.00	0.00	0.00	0.00	1.10	0.00	0.00
maker-tulip_contig_586_pilon_pilon-augustus-gene-3.0-mRNA-1	1.40	0.00	0.00	3.30	2.21	0.00	0.00	0.00	0.00	3.86	0.00	0.00	4.10	0.00	0.00	0.00	0.00	4.14
augustus_masked-tulip_contig_15_pilon_pilon-processed-gene-0.13-mRNA-1	0.00	4.00	0.00	166.00	209.00	158.00	42.00	38.00	48.00	16.00	17.00	26.00	33.00	4.00	18.00	36.00	8.00	41.00
augustus_masked-tulip_contig_212_pilon_pilon-processed-gene-0.18-mRNA-1	0.00	0.00	0.00	0.00	0.00	0.00	0.00	0.00	1.00	0.00	0.00	0.00	0.00	0.00	0.00	0.00	0.00	0.00
augustus_masked-tulip_contig_323_pilon_pilon-processed-gene-3.5-mRNA-1	6.00	13.00	9.00	1.00	2.00	6.00	25.00	23.00	8.00	10.00	7.00	8.00	24.00	0.00	19.00	8.00	6.00	8.00
maker-tulip_contig_35_pilon_pilon-augustus-gene-0.21-mRNA-1	1.00	6.00	3.00	4.00	1.00	5.00	3.00	6.00	3.00	26.00	9.00	13.00	2.00	4.00	13.00	19.00	6.00	12.00
augustus_masked-tulip_contig_157_pilon_pilon-processed-gene-0.6-mRNA-1	5.00	4.00	7.00	158.00	202.00	156.00	144.00	134.00	90.00	252.00	178.00	213.00	431.00	48.00	238.00	134.00	52.00	113.00
maker-tulip_contig_362_pilon_pilon-augustus-gene-3.42-mRNA-1	0.00	0.00	0.00	8.00	5.00	7.00	5.00	4.00	4.00	19.00	30.00	29.00	73.00	13.00	46.00	87.00	18.00	117.00
maker-tulip_contig_827_pilon_pilon-augustus-gene-1.23-mRNA-1	41.00	5.00	16.00	589.00	775.00	808.00	4840.00	2697.00	3437.00	7.00	4.00	2.00	41.00	7.00	23.00	65.00	13.00	29.00
maker-tulip_contig_258_pilon_pilon-augustus-gene-0.14-mRNA-1	2.00	2.00	0.00	0.00	0.00	1.00	0.00	1.00	0.00	2.00	1.00	1.00	0.00	0.00	1.00	0.00	0.00	5.00
augustus_masked-tulip_contig_674_pilon_pilon-processed-gene-8.19-mRNA-1	127.00	120.00	169.00	23.00	35.00	35.00	36.00	28.00	18.00	194.00	93.00	85.00	34.00	6.00	44.00	0.00	0.00	1.00
maker-tulip_contig_748_pilon_pilon-augustus-gene-1.9-mRNA-1	0.00	0.00	2.00	41.00	76.00	88.00	25.00	42.00	20.00	0.00	0.00	0.00	35.00	12.00	22.00	12.00	10.00	5.00
maker-tulip_contig_248_pilon_pilon-augustus-gene-0.26-mRNA-1	13.00	10.00	13.00	32.00	17.00	29.00	10.00	11.00	10.00	55.00	42.00	81.00	155.00	20.00	55.00	127.00	29.00	72.00
maker-tulip_contig_272_pilon_pilon-augustus-gene-5.47-mRNA-1	1203.00	1152.00	1196.00	1456.00	1571.00	1433.00	946.00	777.00	617.00	1152.00	719.00	975.00	2934.00	398.00	1819.00	1294.00	479.00	1158.00
maker-tulip_contig_424_pilon_pilon-augustus-gene-0.84-mRNA-1	5.00	0.00	2.00	28.00	27.00	19.00	21.00	13.00	7.00	33.00	13.00	29.00	34.00	15.00	16.00	19.00	5.00	21.00
augustus_masked-tulip_contig_417_pilon_pilon-processed-gene-0.21-mRNA-1	0.00	0.00	4.00	2.00	1.00	1.00	5.00	2.00	1.00	0.00	0.00	0.00	11.00	0.00	2.00	1.00	0.00	0.00
maker-tulip_contig_715_pilon_pilon-augustus-gene-5.57-mRNA-1	0.00	0.00	0.00	2.00	1.00	1.00	0.00	0.00	0.00	0.00	2.00	0.00	0.00	0.00	0.00	0.00	0.00	0.00
maker-tulip_contig_738_pilon_pilon-augustus-gene-1.16-mRNA-1	0.00	0.00	0.00	0.00	0.00	0.00	0.00	0.00	0.00	0.00	0.00	0.00	0.00	0.00	0.00	304.00	105.00	186.00
maker-tulip_contig_145_pilon_pilon-augustus-gene-4.67-mRNA-1	94.00	134.00	120.00	438.00	529.00	525.00	74.00	51.00	45.00	103.00	54.00	69.00	113.00	19.00	95.00	160.00	41.00	126.00
maker-tulip_contig_441_pilon_pilon-augustus-gene-4.27-mRNA-1	0.00	0.00	0.00	0.00	3.00	1.00	4.00	0.00	2.00	15.00	7.00	5.00	206.00	43.00	172.00	601.00	414.00	918.00
maker-tulip_contig_895_pilon_pilon-augustus-gene-3.7-mRNA-1	0.00	0.00	0.00	44.00	34.00	23.00	17.00	32.00	12.00	22.00	15.00	22.00	24.00	1.00	23.00	48.00	18.00	36.00
augustus_masked-tulip_contig_441_pilon_pilon-processed-gene-0.5-mRNA-1	214.00	164.00	337.00	211.00	225.00	230.00	44.00	43.00	31.00	376.00	300.00	414.00	47.00	2.00	16.00	32.00	11.00	25.00
augustus_masked-tulip_contig_603_pilon_pilon-processed-gene-3.14-mRNA-1	0.00	0.00	0.00	0.00	0.00	0.00	0.00	0.00	0.00	0.00	0.00	0.00	0.00	0.00	0.00	0.00	0.00	0.00
augustus_masked-tulip_contig_325_pilon_pilon-processed-gene-0.47-mRNA-1	0.00	4.00	0.00	0.00	0.00	0.00	0.00	0.00	0.00	1.00	0.00	0.00	0.00	0.00	0.00	0.00	0.00	0.00
maker-tulip_contig_381_pilon_pilon-augustus-gene-0.123-mRNA-1	1.00	1.00	1.00	5.00	5.00	2.00	2.00	6.00	2.00	78.00	10.00	28.00	8.00	0.00	4.00	2.00	0.00	3.00
augustus_masked-tulip_contig_100_pilon_pilon-processed-gene-0.42-mRNA-1	0.00	0.00	0.00	0.00	0.00	0.00	0.00	0.00	0.00	0.00	0.00	0.00	0.00	0.00	0.00	2.00	2.00	3.00
augustus_masked-tulip_contig_812_pilon_pilon-processed-gene-2.10-mRNA-1	0.00	0.00	0.00	0.00	0.00	0.00	0.00	0.00	1.00	1.30	0.00	0.00	0.00	0.00	0.00	0.00	0.00	0.00
augustus_masked-tulip_contig_854_pilon_pilon-processed-gene-0.26-mRNA-1	21.00	45.00	18.00	302.00	325.00	242.00	85.00	121.00	72.00	47.00	37.00	49.00	134.00	25.00	105.00	63.00	25.00	94.00
maker-tulip_contig_687_pilon_pilon-augustus-gene-1.56-mRNA-1	0.00	0.00	0.00	1.00	0.00	0.00	0.00	0.00	0.00	0.00	0.00	0.00	0.00	0.00	0.00	0.00	0.00	1.00
maker-tulip_contig_809_pilon_pilon-augustus-gene-4.5-mRNA-1	72.00	23.00	69.00	252.00	394.00	238.00	217.00	290.00	105.00	24.00	9.00	10.00	261.00	37.00	286.00	382.00	168.00	318.00
augustus_masked-tulip_contig_39_pilon_pilon-processed-gene-1.4-mRNA-1	0.00	2.00	1.00	1.00	5.00	1.00	0.00	2.00	0.00	2.00	2.00	1.00	6.00	0.00	2.00	34.00	22.00	28.00
augustus_masked-tulip_contig_146_pilon_pilon-processed-gene-0.34-mRNA-1	134.00	63.00	129.00	607.00	600.00	545.00	304.00	194.00	164.00	247.00	175.00	201.00	962.00	133.00	552.00	392.00	198.00	612.00
maker-tulip_contig_198_pilon_pilon-augustus-gene-3.6-mRNA-1	321.00	350.00	397.00	562.00	454.00	537.00	344.00	274.00	310.00	553.00	542.00	540.00	1055.00	107.00	633.00	1026.00	383.00	1014.00
maker-tulip_contig_113_pilon_pilon-augustus-gene-0.10-mRNA-1	1753.00	969.00	1293.00	301.00	527.00	443.00	707.00	803.00	477.00	251.00	138.00	200.00	1108.00	132.00	691.00	60.00	28.00	69.00
augustus_masked-tulip_contig_447_pilon_pilon-processed-gene-1.4-mRNA-1	3.00	11.00	2.00	5.00	1.00	2.00	5.00	2.00	0.00	5.00	1.00	2.00	6.00	0.00	1.00	2.00	1.00	8.00
augustus_masked-tulip_contig_114_pilon_pilon-processed-gene-0.23-mRNA-1	0.00	2.00	0.00	3.00	6.00	3.00	3.00	1.00	1.00	5.00	2.00	5.00	8.00	0.00	5.00	10.00	0.00	3.00
maker-tulip_contig_3_pilon_pilon-augustus-gene-4.102-mRNA-1	0.00	0.00	0.00	0.00	1.00	0.00	0.00	0.00	0.00	1.00	0.00	0.00	0.00	0.00	0.00	0.00	0.00	1.00
augustus_masked-tulip_contig_565_pilon_pilon-processed-gene-0.2-mRNA-1	60.00	34.00	45.00	111.00	99.00	99.00	69.00	57.00	68.00	227.00	182.00	252.00	278.00	39.00	110.00	125.00	33.00	115.00
maker-tulip_contig_104_pilon_pilon-augustus-gene-0.18-mRNA-1	0.00	1.00	0.00	2.00	0.00	0.00	1.00	0.00	0.00	0.00	1.00	0.00	1.00	0.00	1.00	0.00	0.00	0.00
augustus_masked-tulip_contig_146_pilon_pilon-processed-gene-0.39-mRNA-1	843.51	473.20	572.84	214.12	340.58	299.41	526.00	471.50	343.59	112.55	104.28	77.70	857.59	126.96	691.71	1.16	13.86	28.89
maker-tulip_contig_799_pilon_pilon-augustus-gene-0.9-mRNA-1	2.00	1.00	3.00	1.00	1.00	1.00	0.00	1.00	2.00	1.00	1.00	0.00	3.00	0.00	7.00	1281.00	674.00	1529.00
augustus_masked-tulip_contig_102_pilon_pilon-processed-gene-0.16-mRNA-1	136.00	111.00	116.00	241.00	217.00	233.00	211.00	286.00	113.00	314.00	297.00	278.00	580.00	67.00	339.00	363.00	117.00	342.00
augustus_masked-tulip_contig_209_pilon_pilon-processed-gene-2.4-mRNA-1	5.00	3.00	7.00	283.00	180.00	165.00	297.00	604.00	199.00	1585.00	971.00	1000.00	997.00	87.00	551.00	464.00	126.00	272.00
maker-tulip_contig_640_pilon_pilon-augustus-gene-2.4-mRNA-1	3.00	1.00	1.00	111.00	85.00	131.00	124.00	98.00	60.00	1275.00	1282.00	1402.00	212.00	27.90	112.00	144.00	57.00	111.00
maker-tulip_contig_854_pilon_pilon-augustus-gene-1.46-mRNA-1	84.00	141.00	102.00	108.00	119.00	107.00	120.00	132.00	106.00	202.00	201.00	207.00	722.00	113.00	511.00	122.00	47.00	70.00
augustus_masked-tulip_contig_276_pilon_pilon-processed-gene-3.83-mRNA-1	117.00	183.00	138.00	15.00	21.00	24.00	20.00	11.00	12.00	74.00	16.00	26.00	40.00	13.00	43.00	18.00	6.00	25.00
augustus_masked-tulip_contig_401_pilon_pilon-processed-gene-0.11-mRNA-1	2819.00	2820.00	2633.00	2514.00	2990.00	2534.00	1628.00	1625.00	1070.00	5219.00	4291.00	5361.00	3811.00	540.00	2243.00	731.00	301.00	783.00
maker-tulip_contig_309_pilon_pilon-augustus-gene-0.6-mRNA-1	0.00	0.00	1.00	2.00	0.00	0.00	0.00	0.00	0.00	0.00	0.00	0.00	14.00	1.00	6.00	17.00	12.00	23.00
maker-tulip_contig_199_pilon_pilon-augustus-gene-3.43-mRNA-1	5.00	16.00	22.00	184.00	238.00	177.00	198.00	101.00	79.00	23.00	22.00	27.00	94.00	13.00	56.09	19.00	8.00	37.00
augustus_masked-tulip_contig_145_pilon_pilon-processed-gene-5.9-mRNA-1	0.00	0.00	0.00	23.00	8.00	19.00	19.00	3.00	12.00	0.00	0.00	0.00	150.00	6.00	3.00	51.00	1.00	0.00
maker-tulip_contig_218_pilon_pilon-augustus-gene-0.29-mRNA-1	0.00	0.00	0.00	1827.00	1730.00	1724.00	2706.00	2446.00	1501.00	6.00	10.00	10.00	180.00	24.00	125.00	219.00	70.00	196.00
augustus_masked-tulip_contig_637_pilon_pilon-processed-gene-0.4-mRNA-1	0.00	0.00	0.00	0.00	0.00	0.00	0.00	0.00	0.00	0.00	0.00	0.00	0.00	0.00	0.00	0.00	0.00	0.00
augustus_masked-tulip_contig_323_pilon_pilon-processed-gene-1.39-mRNA-1	1.00	4.00	1.00	3.00	3.00	10.00	1.00	2.00	1.00	0.00	0.00	1.00	11.00	0.00	6.00	1.00	0.00	2.00
augustus_masked-tulip_contig_130_pilon_pilon-processed-gene-0.44-mRNA-1	2164.00	1903.00	1862.00	962.00	1123.00	929.00	529.00	556.00	415.00	1220.00	942.00	1196.00	2596.00	366.00	1687.00	510.00	235.00	557.00
maker-tulip_contig_46_pilon_pilon-augustus-gene-0.11-mRNA-1	0.00	4.00	1.00	4.00	21.00	17.00	365.00	364.00	274.00	648.00	437.00	527.00	223.00	41.00	895.00	14.00	5.00	10.00
maker-tulip_contig_429_pilon_pilon-augustus-gene-1.26-mRNA-1	167.00	101.00	163.00	77.00	27.00	94.00	45.00	96.00	92.00	55.60	80.00	99.00	3.00	2.00	43.00	19.00	2.00	58.00
augustus_masked-tulip_contig_622_pilon_pilon-processed-gene-0.3-mRNA-1	0.00	0.00	0.00	0.00	0.00	0.00	1.00	0.00	0.00	0.00	0.30	0.00	0.65	0.00	0.00	0.00	0.00	0.00
augustus_masked-tulip_contig_855_pilon_pilon-processed-gene-1.12-mRNA-1	75.00	77.00	52.00	73.00	107.00	89.00	49.00	30.00	30.00	71.00	58.00	54.00	219.00	36.00	167.00	138.00	35.00	90.00
maker-tulip_contig_331_pilon_pilon-augustus-gene-0.28-mRNA-1	4571.00	3541.00	4576.00	162.00	161.00	196.00	141.00	214.00	182.00	882.00	744.00	960.00	527.00	90.00	394.00	271.00	129.00	233.00
maker-tulip_contig_441_pilon_pilon-augustus-gene-2.10-mRNA-1	340.00	247.00	206.00	114.00	148.00	156.00	157.00	134.00	73.00	390.00	313.00	429.00	633.00	93.00	406.00	74.00	35.00	76.00
augustus_masked-tulip_contig_34_pilon_pilon-processed-gene-0.1-mRNA-1	0.00	0.00	0.00	0.00	0.00	0.00	0.00	0.00	0.00	0.00	0.00	0.00	0.00	0.00	0.00	3.00	3.00	3.00
maker-tulip_contig_525_pilon_pilon-augustus-gene-0.42-mRNA-1	1.00	2.00	1.00	8.00	20.00	7.00	4.00	0.00	2.00	4.00	2.00	4.00	11.00	3.00	2.00	4.00	2.00	14.00
maker-tulip_contig_537_pilon_pilon-augustus-gene-1.6-mRNA-1	3.00	8.00	13.00	96.00	85.00	93.00	108.00	106.00	60.00	249.00	173.00	221.00	34.00	4.00	14.00	46.00	8.00	39.00
maker-tulip_contig_773_pilon_pilon-augustus-gene-0.13-mRNA-1	0.00	0.00	0.00	0.00	0.00	1.00	0.00	0.00	0.00	0.00	0.00	0.00	0.00	0.00	0.00	0.00	0.00	0.00
augustus_masked-tulip_contig_715_pilon_pilon-processed-gene-0.46-mRNA-1	0.00	2.00	4.00	4.00	2.00	1.00	0.00	0.00	1.00	12.00	4.00	4.00	4.00	3.00	5.00	2.00	0.00	3.00
augustus_masked-tulip_contig_473_pilon_pilon-processed-gene-0.21-mRNA-1	0.00	0.00	0.00	0.00	0.00	0.00	0.00	0.00	0.00	0.00	0.00	0.00	0.00	0.00	0.00	0.00	0.00	0.00
augustus_masked-tulip_contig_583_pilon_pilon-processed-gene-1.34-mRNA-1	77.00	51.00	70.00	45.00	30.00	56.00	30.00	19.00	31.00	99.00	114.00	99.00	195.00	25.00	155.00	21.00	17.00	44.00
maker-tulip_contig_272_pilon_pilon-augustus-gene-4.3-mRNA-1	111.00	102.00	131.00	141.00	137.00	130.00	83.00	73.00	65.00	157.00	124.00	172.00	334.00	45.00	219.00	90.00	35.00	112.00
maker-tulip_contig_339_pilon_pilon-augustus-gene-2.13-mRNA-1	0.00	0.00	0.00	0.00	0.00	0.00	0.00	0.00	0.00	0.00	0.00	0.00	1.00	0.00	0.00	0.00	0.00	1.00
maker-tulip_contig_28_pilon_pilon-augustus-gene-0.4-mRNA-1	2.93	0.00	0.00	0.00	0.00	0.00	0.00	2.71	1.20	0.00	0.00	0.00	0.00	0.00	0.00	0.00	0.00	0.00
maker-tulip_contig_597_pilon_pilon-augustus-gene-3.4-mRNA-1	733.00	582.00	677.00	85.00	126.00	144.00	109.00	126.00	76.00	160.00	111.00	158.00	470.00	55.00	385.00	118.00	28.00	111.00
maker-tulip_contig_244_pilon_pilon-augustus-gene-0.36-mRNA-1	0.00	0.00	2.00	4.00	0.00	0.00	0.00	0.00	1.00	0.00	0.00	0.00	0.00	1.00	0.00	0.00	0.00	2.00
maker-tulip_contig_279_pilon_pilon-augustus-gene-1.11-mRNA-1	0.00	4.00	4.00	1.00	3.00	1.00	1.00	1.00	0.00	2.00	1.00	0.00	7.00	0.00	3.00	1.00	2.00	4.00
maker-tulip_contig_831_pilon_pilon-augustus-gene-4.60-mRNA-1	12.00	8.00	13.00	28.00	39.00	24.00	11.00	3.00	16.00	41.00	12.00	25.00	89.00	4.00	48.00	41.00	12.00	42.00
augustus_masked-tulip_contig_583_pilon_pilon-processed-gene-2.6-mRNA-1	4.00	10.00	7.00	26.00	25.00	25.00	6.00	8.00	1.00	13.00	9.00	15.00	15.00	2.00	10.00	6.00	2.00	3.00
augustus_masked-tulip_contig_53_pilon_pilon-processed-gene-0.5-mRNA-1	0.00	0.00	0.00	0.00	0.00	0.00	0.00	0.00	0.00	0.00	0.00	0.00	0.00	0.00	1.00	0.00	0.00	0.00
maker-tulip_contig_854_pilon_pilon-augustus-gene-2.44-mRNA-1	0.00	0.00	0.00	4.00	0.00	3.00	0.00	0.00	0.00	0.00	0.00	0.00	0.00	0.00	0.00	0.00	0.00	0.00
augustus_masked-tulip_contig_620_pilon_pilon-processed-gene-2.26-mRNA-1	0.00	0.00	0.00	0.00	0.00	1.00	0.00	1.00	0.00	0.00	0.00	0.00	5.00	0.00	1.00	6.00	4.00	1.00
augustus_masked-tulip_contig_327_pilon_pilon-processed-gene-4.17-mRNA-1	3.00	2.00	1.00	11.00	19.00	13.00	2.00	1.00	5.00	28.00	17.00	31.00	5.00	0.00	1.00	2.00	5.00	4.00
maker-tulip_contig_697_pilon_pilon-augustus-gene-0.20-mRNA-1	89.00	95.00	73.00	155.00	89.00	106.00	102.00	80.00	87.00	82.00	96.00	90.00	313.00	46.00	233.00	93.00	33.00	95.00
maker-tulip_contig_46_pilon_pilon-augustus-gene-0.15-mRNA-1	3.00	0.00	0.00	26.00	64.00	52.00	30.00	35.00	16.00	254.00	161.00	158.00	273.00	39.00	166.00	257.00	69.00	167.00
augustus_masked-tulip_contig_654_pilon_pilon-processed-gene-1.34-mRNA-1	0.00	0.00	0.00	55.00	58.00	68.00	93.00	72.00	77.00	236.00	132.00	198.00	20.00	1.00	3.00	7.00	2.00	8.00
maker-tulip_contig_157_pilon_pilon-augustus-gene-0.45-mRNA-1	1.00	5.00	13.00	7.00	16.00	16.00	9.00	6.00	10.00	51.00	34.00	35.00	44.00	10.00	24.00	13.00	3.00	19.00
maker-tulip_contig_620_pilon_pilon-augustus-gene-0.41-mRNA-1	5.00	13.00	13.00	0.00	3.00	6.00	0.00	2.00	3.00	9.00	4.00	10.00	45.00	5.00	15.00	10.00	12.00	11.00
augustus_masked-tulip_contig_43_pilon_pilon-processed-gene-5.5-mRNA-1	0.69	0.00	0.00	0.00	0.00	0.00	0.00	0.00	0.00	0.00	0.00	0.00	0.00	0.00	0.00	0.00	0.00	0.00
maker-tulip_contig_318_pilon_pilon-augustus-gene-0.29-mRNA-1	460.00	323.00	436.00	91.00	146.00	96.00	127.00	148.00	83.00	99.00	76.00	102.00	330.00	55.00	238.00	28.00	20.00	40.00
augustus_masked-tulip_contig_303_pilon_pilon-processed-gene-2.1-mRNA-1	14.76	16.25	14.72	59.68	58.63	79.00	38.72	41.42	48.67	50.71	40.60	44.85	82.38	2.55	55.26	72.05	14.01	42.99
maker-tulip_contig_852_pilon_pilon-augustus-gene-0.20-mRNA-1	0.00	0.00	0.00	74.00	74.00	70.00	25.00	22.00	13.00	56.00	26.00	29.00	1.00	0.00	0.00	0.00	0.00	0.00
maker-tulip_contig_674_pilon_pilon-augustus-gene-0.52-mRNA-1	14.00	6.00	20.00	35.00	37.00	45.00	130.00	102.00	81.00	9945.00	5638.00	8723.00	78.00	17.00	80.00	704.00	450.00	1270.00
maker-tulip_contig_907_pilon_pilon-augustus-gene-2.1-mRNA-1	383.00	441.00	476.00	276.00	277.00	278.00	284.00	273.00	232.00	427.00	383.00	430.00	649.00	89.00	448.00	236.00	139.00	285.00
augustus_masked-tulip_contig_870_pilon_pilon-processed-gene-2.15-mRNA-1	0.00	0.00	0.00	0.00	0.00	0.00	0.00	0.00	0.00	0.00	0.00	0.00	0.00	0.00	0.00	0.00	0.00	1.00
maker-tulip_contig_598_pilon_pilon-augustus-gene-0.50-mRNA-1	44.00	37.00	66.00	238.00	263.00	262.00	201.00	182.00	129.00	377.00	241.00	322.00	791.00	118.00	460.00	397.00	109.00	425.00
augustus_masked-tulip_contig_68_pilon_pilon-processed-gene-0.77-mRNA-1	159.00	138.00	150.00	188.00	183.00	199.00	140.00	112.00	82.00	281.00	238.00	271.00	753.00	109.00	423.00	244.00	89.00	239.00
maker-tulip_contig_473_pilon_pilon-augustus-gene-0.9-mRNA-1	1559.00	499.00	1011.00	720.00	533.00	702.00	753.00	593.00	563.00	1899.00	1528.00	1790.00	1589.00	180.00	965.00	845.00	303.00	662.00
maker-tulip_contig_560_pilon_pilon-augustus-gene-3.45-mRNA-1	453.00	522.00	551.00	593.00	589.00	577.00	306.00	317.00	253.00	346.00	300.00	299.00	628.00	98.00	497.00	206.00	130.00	270.00
maker-tulip_contig_860_pilon_pilon-augustus-gene-1.9-mRNA-1	1.00	0.00	0.00	3705.00	3145.00	4027.00	5909.00	4354.00	3561.00	766.00	689.00	808.00	1437.00	141.00	887.00	1724.00	660.00	2318.00
maker-tulip_contig_632_pilon_pilon-augustus-gene-2.7-mRNA-1	0.00	0.00	0.00	0.00	0.00	0.00	0.00	0.00	0.00	0.00	0.00	0.00	0.00	0.00	0.00	0.00	0.00	0.00
maker-tulip_contig_828_pilon_pilon-augustus-gene-0.4-mRNA-1	0.00	0.00	0.00	18.00	13.00	16.00	32.00	35.00	27.00	10.00	4.00	3.00	21.00	1.00	12.00	10.00	2.00	7.00
maker-tulip_contig_298_pilon_pilon-augustus-gene-0.27-mRNA-1	23.00	6.00	19.00	2.00	2.00	2.00	2.00	6.00	2.00	5.00	0.00	4.00	7.00	4.00	1.00	2.00	1.00	3.00
augustus_masked-tulip_contig_516_pilon_pilon-processed-gene-3.91-mRNA-1	0.00	0.00	0.00	15.00	8.00	14.00	134.00	178.00	100.00	0.00	0.00	0.00	1.00	0.00	0.00	0.00	0.00	0.00
augustus_masked-tulip_contig_368_pilon_pilon-processed-gene-0.28-mRNA-1	1.00	2.00	0.00	5.00	4.00	3.00	10.00	6.00	1.00	14.00	6.00	9.00	13.00	0.00	9.00	3.00	1.00	13.00
maker-tulip_contig_537_pilon_pilon-augustus-gene-1.11-mRNA-1	24.00	7.00	43.00	18.00	32.00	21.00	16.00	16.00	10.00	72.00	59.00	72.00	42.00	2.00	35.00	24.00	4.00	22.00
maker-tulip_contig_446_pilon_pilon-augustus-gene-1.22-mRNA-1	1944.00	677.00	846.00	72.00	45.00	44.00	57.00	31.00	29.00	87.00	66.00	86.00	126.00	25.00	52.00	49.00	16.00	46.00
maker-tulip_contig_190_pilon_pilon-augustus-gene-2.11-mRNA-1	0.00	0.00	0.00	0.00	0.00	0.00	3.00	3.00	0.00	4.00	4.00	6.00	10.00	1.00	1.00	7.00	1.00	4.00
augustus_masked-tulip_contig_597_pilon_pilon-processed-gene-1.20-mRNA-1	0.00	0.00	0.00	0.00	1.00	0.00	0.00	0.00	0.00	0.00	0.00	0.00	0.00	0.00	0.00	0.00	0.00	0.00
maker-tulip_contig_583_pilon_pilon-augustus-gene-1.11-mRNA-1	1.00	5.00	2.00	7.00	9.00	4.00	4.00	6.00	2.00	10.00	4.00	8.00	5.00	1.00	4.00	0.00	0.00	9.00
maker-tulip_contig_16_pilon_pilon-augustus-gene-1.4-mRNA-1	62.00	13.00	88.00	227.00	264.00	179.00	41.00	25.00	37.00	367.00	243.00	373.00	43.00	11.00	38.00	22.00	8.00	19.00
augustus_masked-tulip_contig_483_pilon_pilon-processed-gene-0.22-mRNA-1	2.00	2.72	3.00	3.00	1.00	5.00	2.00	0.00	0.00	1.18	0.00	2.00	3.00	2.00	1.00	3.00	3.00	3.00
maker-tulip_contig_75_pilon_pilon-augustus-gene-0.56-mRNA-1	273.00	325.00	245.00	1360.00	1046.00	842.00	1119.00	1323.00	793.00	201.00	244.00	251.00	2032.00	273.00	1314.00	476.00	188.00	433.00
maker-tulip_contig_392_pilon_pilon-augustus-gene-0.32-mRNA-1	7.00	7.00	10.00	1.00	2.00	2.00	3.00	2.00	0.00	1.00	2.00	0.00	2.00	0.00	2.00	0.00	0.00	0.00
maker-tulip_contig_272_pilon_pilon-augustus-gene-4.40-mRNA-1	6.00	1.00	1.00	60.00	50.00	61.00	75.00	36.00	29.00	14.00	3.00	15.00	76.00	10.00	46.00	40.00	22.00	70.00
maker-tulip_contig_837_pilon_pilon-augustus-gene-9.38-mRNA-1	1.00	0.00	0.00	3.00	0.00	1.00	0.00	1.00	0.00	0.00	0.00	0.00	1.00	0.00	4.00	4.00	3.00	4.00
augustus_masked-tulip_contig_190_pilon_pilon-processed-gene-1.10-mRNA-1	0.00	1.00	0.00	4.00	6.00	4.00	3.00	13.00	4.00	15.00	11.00	10.00	312.00	34.00	869.00	792.00	304.00	649.00
augustus_masked-tulip_contig_410_pilon_pilon-processed-gene-0.4-mRNA-1	2.00	0.00	0.00	0.00	0.00	0.00	3.00	1.00	0.00	0.00	2.98	0.00	0.04	0.00	0.00	3.00	0.00	0.52
maker-tulip_contig_63_pilon_pilon-augustus-gene-0.68-mRNA-1	16.00	12.00	9.00	38.00	60.00	31.00	25.00	26.00	18.00	35.00	21.00	22.00	67.00	8.00	50.00	8.00	8.00	22.00
maker-tulip_contig_901_pilon_pilon-augustus-gene-0.0-mRNA-1	0.00	1.00	0.00	0.00	0.00	0.00	0.00	0.00	0.00	0.00	0.00	0.00	0.00	1.00	0.00	0.00	0.00	0.00
maker-tulip_contig_323_pilon_pilon-augustus-gene-8.56-mRNA-1	82.00	21.00	58.00	155.00	230.00	150.00	68.00	58.00	65.00	227.00	139.00	197.00	120.00	25.00	51.00	44.00	18.00	67.00
augustus_masked-tulip_contig_441_pilon_pilon-processed-gene-10.26-mRNA-1	2.00	0.00	0.00	0.00	0.00	0.00	0.00	0.00	0.00	0.00	0.00	0.00	0.00	0.00	0.00	0.00	0.00	0.00
augustus_masked-tulip_contig_482_pilon_pilon-processed-gene-3.30-mRNA-1	0.00	2.00	0.00	2592.00	21.00	2772.00	426.00	344.00	235.00	9.00	2.00	8.00	9.00	2.00	13.00	13.00	14.00	36.00
augustus_masked-tulip_contig_531_pilon_pilon-processed-gene-7.25-mRNA-1	0.00	2.00	0.00	0.00	0.00	0.00	3.00	0.00	0.00	0.00	0.00	0.00	1.21	0.00	2.00	0.00	0.00	0.00
augustus_masked-tulip_contig_479_pilon_pilon-processed-gene-1.8-mRNA-1	0.00	2.00	0.00	0.00	0.00	0.00	0.00	0.00	0.00	1.00	0.00	0.00	0.00	0.00	0.00	1.00	2.00	2.00
maker-tulip_contig_507_pilon_pilon-augustus-gene-1.1-mRNA-1	0.00	0.00	0.00	1.00	3.00	0.00	0.00	2.00	0.00	1.00	1.00	2.00	0.00	0.00	0.00	0.00	3.00	1.00
augustus_masked-tulip_contig_506_pilon_pilon-processed-gene-1.4-mRNA-1	3.53	4.33	0.00	0.00	0.00	0.00	0.00	0.00	1.00	0.00	0.00	0.00	12.17	2.89	14.16	0.00	1.94	6.86
maker-tulip_contig_841_pilon_pilon-augustus-gene-0.51-mRNA-1	417.00	289.00	402.00	211.00	251.00	209.00	173.00	132.00	115.00	320.00	287.00	328.00	737.00	111.00	522.00	172.00	51.00	123.00
maker-tulip_contig_320_pilon_pilon-augustus-gene-3.44-mRNA-1	235.00	199.00	306.00	26.00	42.00	42.00	35.00	34.00	21.00	61.00	59.00	52.00	250.00	29.00	246.00	27.00	14.00	25.00
augustus_masked-tulip_contig_305_pilon_pilon-processed-gene-0.40-mRNA-1	0.00	0.00	0.00	7.00	4.00	12.00	0.00	1.00	0.00	0.00	0.00	0.00	1.00	0.00	1.00	7.00	9.00	19.00
maker-tulip_contig_394_pilon_pilon-augustus-gene-3.36-mRNA-1	2088.00	2064.00	2345.00	1345.00	1349.00	1440.00	1369.00	1200.00	926.00	2160.00	1544.00	1827.00	3417.00	543.00	2197.00	786.00	328.00	776.00
maker-tulip_contig_218_pilon_pilon-augustus-gene-1.43-mRNA-1	0.00	0.00	0.00	112.00	25.00	128.00	5110.00	1903.00	2653.00	2.00	0.00	1.00	2.00	0.00	0.00	0.00	1.00	0.00
maker-tulip_contig_702_pilon_pilon-augustus-gene-0.97-mRNA-1	722.00	352.00	588.00	1095.00	1156.00	1064.00	965.00	1234.00	659.00	941.00	860.00	966.00	4331.00	685.00	2965.00	2972.00	1281.00	3423.00
maker-tulip_contig_841_pilon_pilon-augustus-gene-0.54-mRNA-1	239.00	103.00	137.00	380.00	322.00	268.00	247.00	154.00	180.00	278.00	198.00	309.00	1233.00	152.00	630.00	531.00	172.00	536.00
maker-tulip_contig_176_pilon_pilon-augustus-gene-0.77-mRNA-1	0.00	0.00	0.00	0.00	0.00	1.00	0.00	0.00	0.00	1.00	0.00	0.00	0.00	0.00	0.00	0.00	0.00	0.00
maker-tulip_contig_110_pilon_pilon-augustus-gene-2.68-mRNA-1	3.00	1.00	2.00	1595.00	1679.00	1488.00	243.00	191.00	187.00	28.00	23.00	27.00	141.00	19.00	67.00	204.00	81.00	152.00
maker-tulip_contig_227_pilon_pilon-augustus-gene-0.2-mRNA-1	1.00	0.00	1.00	78.00	66.00	58.00	27.00	22.00	20.00	742.00	573.00	744.00	123.00	13.00	92.00	46.00	17.00	63.00
augustus_masked-tulip_contig_85_pilon_pilon-processed-gene-0.4-mRNA-1	2.00	2.00	0.00	30.00	31.00	26.00	10.00	5.00	8.00	10.00	11.00	31.00	16.00	1.00	18.00	16.00	15.00	24.00
maker-tulip_contig_323_pilon_pilon-augustus-gene-6.24-mRNA-1	865.00	627.00	653.00	738.00	858.00	784.00	643.00	768.00	466.00	3203.00	2240.00	3037.00	2685.00	345.00	1507.00	3140.00	1496.00	3355.00
maker-tulip_contig_441_pilon_pilon-augustus-gene-5.31-mRNA-1	951.00	854.00	962.00	241.00	328.00	350.00	354.00	363.00	332.00	408.00	350.00	414.00	1047.00	160.00	731.00	181.00	88.00	226.00
augustus_masked-tulip_contig_60_pilon_pilon-processed-gene-0.11-mRNA-1	0.00	0.00	0.00	71.00	57.00	47.00	253.00	82.00	119.00	36.00	27.00	21.00	3.00	0.00	1.00	21.00	13.00	18.00
maker-tulip_contig_420_pilon_pilon-augustus-gene-2.91-mRNA-1	1601.00	1171.00	1509.00	644.00	800.00	741.00	1188.00	1198.00	900.00	645.00	529.00	626.00	1352.00	156.00	788.00	180.00	72.00	185.00
augustus_masked-tulip_contig_168_pilon_pilon-processed-gene-1.32-mRNA-1	29.00	43.00	22.00	469.00	385.00	478.00	768.00	683.00	527.00	963.00	677.00	881.00	1580.00	163.00	638.00	1247.00	347.00	981.00
augustus_masked-tulip_contig_643_pilon_pilon-processed-gene-0.2-mRNA-1	0.00	0.00	0.00	0.00	0.00	0.00	0.00	0.00	1.00	5.00	22.00	6.00	0.00	0.00	0.00	0.00	0.00	0.00
augustus_masked-tulip_contig_852_pilon_pilon-processed-gene-0.4-mRNA-1	0.00	1.00	1.00	4.00	4.00	4.00	49.00	34.00	38.00	520.00	484.00	324.00	339.00	34.00	230.00	182.00	180.00	310.00
augustus_masked-tulip_contig_303_pilon_pilon-processed-gene-0.19-mRNA-1	0.00	1.00	0.00	0.00	0.00	0.00	0.00	0.00	0.00	0.00	0.00	0.00	3.00	1.00	4.00	68.00	53.00	90.00
maker-tulip_contig_316_pilon_pilon-augustus-gene-1.32-mRNA-1	0.00	0.00	0.00	390.00	306.00	402.00	466.00	369.00	231.00	119.00	49.00	81.00	227.00	26.00	90.00	183.00	51.00	224.00
augustus_masked-tulip_contig_182_pilon_pilon-processed-gene-0.14-mRNA-1	0.00	0.00	0.00	0.00	0.00	0.00	0.00	0.00	0.00	0.00	1.05	0.00	0.00	0.00	0.00	0.00	0.00	0.00
augustus_masked-tulip_contig_167_pilon_pilon-processed-gene-0.0-mRNA-1	2.00	2.00	3.00	0.00	1.00	1.00	2.00	2.00	0.00	1.00	0.00	2.00	6.00	0.00	5.00	0.00	0.00	0.00
maker-tulip_contig_806_pilon_pilon-augustus-gene-0.6-mRNA-1	0.00	0.00	0.00	57.00	59.00	81.00	11.00	5.00	7.00	0.00	0.00	0.00	13.00	0.00	8.00	28.00	10.00	26.00
augustus_masked-tulip_contig_778_pilon_pilon-processed-gene-1.23-mRNA-1	0.00	0.00	0.00	1.67	0.00	0.00	19.54	2.31	2.76	0.00	0.00	0.00	3.25	0.00	0.00	0.00	0.00	0.00
maker-tulip_contig_759_pilon_pilon-augustus-gene-1.45-mRNA-1	0.00	1.00	0.00	3.00	6.00	2.00	3.00	3.00	2.00	1.00	0.00	2.00	0.00	0.00	2.00	51.00	23.00	48.00
maker-tulip_contig_555_pilon_pilon-augustus-gene-0.27-mRNA-1	0.00	0.00	0.00	0.00	0.00	0.00	0.00	0.00	0.00	0.00	0.00	0.00	2.00	1.00	3.00	2460.00	855.00	1713.00
maker-tulip_contig_799_pilon_pilon-augustus-gene-0.7-mRNA-1	272.00	138.00	246.00	283.00	289.00	304.00	287.00	338.00	220.00	821.00	349.00	426.00	678.00	86.00	418.00	408.00	166.00	354.00
maker-tulip_contig_523_pilon_pilon-augustus-gene-0.143-mRNA-1	34.00	18.00	49.00	83.00	103.00	98.00	87.00	85.00	37.00	223.00	126.00	180.00	170.00	48.00	108.00	70.00	32.00	98.00
augustus_masked-tulip_contig_768_pilon_pilon-processed-gene-0.9-mRNA-1	0.00	0.00	0.00	0.00	0.00	0.00	0.00	0.00	0.00	0.00	0.00	0.00	2.99	0.00	0.00	0.00	0.00	0.00
maker-tulip_contig_375_pilon_pilon-augustus-gene-0.0-mRNA-1	660.00	313.00	427.00	65.00	71.00	64.00	89.00	84.00	67.00	184.00	130.00	167.00	280.00	23.00	155.00	79.00	24.00	59.00
maker-tulip_contig_691_pilon_pilon-augustus-gene-1.4-mRNA-1	46.00	81.00	56.00	855.00	439.00	687.00	1024.00	780.00	700.00	394.00	330.00	257.00	1086.00	157.00	783.00	842.00	417.00	893.00
maker-tulip_contig_507_pilon_pilon-augustus-gene-1.41-mRNA-1	5.00	14.00	6.00	114.00	35.00	54.00	42.00	45.00	62.00	45.00	22.00	21.00	25.00	7.00	13.00	23.00	3.00	11.00
maker-tulip_contig_455_pilon_pilon-augustus-gene-0.38-mRNA-1	1674.00	1219.00	1449.00	275.00	240.00	326.00	362.00	383.00	272.00	1136.00	895.00	1027.00	1593.00	232.00	1068.00	497.00	164.00	502.00
augustus_masked-tulip_contig_217_pilon_pilon-processed-gene-1.5-mRNA-1	0.00	0.00	0.00	0.00	0.00	0.00	0.00	0.00	0.00	0.00	0.00	0.00	0.00	0.00	0.00	0.00	0.00	0.00
maker-tulip_contig_318_pilon_pilon-augustus-gene-1.35-mRNA-1	1832.00	1694.00	1955.00	560.00	453.00	555.00	427.00	334.00	333.00	910.00	773.00	919.00	2056.00	277.00	1334.00	391.00	194.00	416.00
maker-tulip_contig_73_pilon_pilon-augustus-gene-0.91-mRNA-1	34.00	57.00	38.00	106.00	93.00	60.00	80.00	53.00	42.00	208.00	166.00	214.00	630.00	75.00	304.00	111.00	52.00	178.00
maker-tulip_contig_697_pilon_pilon-augustus-gene-2.13-mRNA-1	2432.00	2668.00	2600.00	9922.00	10110.00	10512.00	8130.00	7077.00	4614.00	1574.00	1261.00	1445.00	19393.00	2000.00	8349.00	14152.00	3110.00	14235.00
augustus_masked-tulip_contig_598_pilon_pilon-processed-gene-0.16-mRNA-1	0.00	0.00	0.00	0.00	0.00	0.00	0.00	0.00	0.00	0.00	0.00	0.00	0.00	0.00	1.00	0.01	0.00	0.00
augustus_masked-tulip_contig_15_pilon_pilon-processed-gene-3.17-mRNA-1	0.00	0.00	0.00	0.00	0.00	0.00	0.00	0.00	0.00	0.00	1.00	0.00	0.00	0.00	0.00	0.00	0.00	0.00
augustus_masked-tulip_contig_654_pilon_pilon-processed-gene-1.31-mRNA-1	0.00	0.00	0.00	0.00	0.00	0.00	0.00	0.00	1.95	0.00	0.00	0.00	0.00	0.00	0.00	0.00	0.00	0.00
maker-tulip_contig_907_pilon_pilon-augustus-gene-2.29-mRNA-1	22.00	40.00	36.00	117.00	107.00	106.00	57.00	45.00	32.00	449.00	53.00	216.00	43.00	11.00	49.00	19.00	6.00	36.00
maker-tulip_contig_841_pilon_pilon-augustus-gene-0.68-mRNA-1	25.18	60.78	27.84	10.72	6.67	2.41	4.89	8.45	8.27	19.60	20.71	25.00	27.11	3.00	13.91	10.00	4.56	7.76
augustus_masked-tulip_contig_714_pilon_pilon-processed-gene-0.94-mRNA-1	20.00	12.00	17.00	33.00	22.00	33.00	15.00	13.00	6.00	57.00	47.00	39.00	101.00	11.00	66.00	31.00	6.00	27.00
augustus_masked-tulip_contig_22_pilon_pilon-processed-gene-0.18-mRNA-1	0.00	0.00	0.00	6191.00	3325.00	2389.00	1267.00	537.00	772.00	50.00	66.00	72.00	999.00	109.00	557.00	793.00	287.00	742.00
maker-tulip_contig_538_pilon_pilon-augustus-gene-0.14-mRNA-1	0.00	0.00	0.00	0.00	1.04	2.05	0.00	0.00	0.00	0.00	0.00	0.00	0.00	0.00	0.00	0.00	0.00	0.00
maker-tulip_contig_454_pilon_pilon-augustus-gene-3.10-mRNA-1	33.00	20.00	36.00	128.00	141.00	112.00	119.00	98.00	73.00	129.00	115.00	124.00	378.00	46.00	236.00	135.00	60.00	156.00
maker-tulip_contig_63_pilon_pilon-augustus-gene-0.22-mRNA-1	0.00	0.00	2.00	2.00	3.00	3.00	1.00	1.00	0.00	3.00	0.00	2.00	5.00	1.00	6.00	0.00	0.00	0.00
maker-tulip_contig_762_pilon_pilon-augustus-gene-0.22-mRNA-1	0.00	0.00	0.00	119.00	139.00	82.00	17.00	12.00	6.00	5.00	0.00	0.00	15.00	0.00	5.00	20.00	14.00	9.00
maker-tulip_contig_39_pilon_pilon-augustus-gene-0.33-mRNA-1	1136.71	1014.18	1101.06	176.37	185.00	198.52	202.56	191.52	159.52	256.95	256.93	228.97	1426.75	186.88	1134.03	120.67	32.99	91.48
maker-tulip_contig_716_pilon_pilon-augustus-gene-1.41-mRNA-1	692.00	499.00	543.00	154.00	203.00	193.00	170.00	162.00	97.00	301.00	217.00	246.00	517.00	69.00	302.00	184.00	56.00	180.00
maker-tulip_contig_4_pilon_pilon-augustus-gene-1.0-mRNA-1	187.00	164.00	165.00	181.00	226.00	190.00	148.00	210.00	130.00	345.00	251.00	260.00	438.00	69.00	302.00	412.00	180.00	398.00
maker-tulip_contig_199_pilon_pilon-augustus-gene-3.59-mRNA-1	322.00	174.00	289.00	30.00	39.00	37.00	20.00	34.00	16.00	78.00	64.00	60.00	180.00	17.00	128.00	34.00	13.00	33.00
augustus_masked-tulip_contig_547_pilon_pilon-processed-gene-6.34-mRNA-1	16.00	2.00	6.00	30.00	19.00	33.00	18.00	10.00	11.00	44.00	50.00	43.00	39.00	6.00	34.00	31.00	19.00	36.00
maker-tulip_contig_35_pilon_pilon-augustus-gene-0.4-mRNA-1	20.00	14.00	20.00	17.00	34.00	24.00	20.00	31.00	15.00	61.00	43.00	45.00	101.00	22.00	83.00	25.00	28.00	49.00
augustus_masked-tulip_contig_199_pilon_pilon-processed-gene-5.34-mRNA-1	1.00	3.00	0.00	2.00	3.00	3.00	1.00	2.00	1.00	9.00	6.00	4.00	16.00	4.00	13.00	46.00	19.00	31.00
maker-tulip_contig_448_pilon_pilon-augustus-gene-2.26-mRNA-1	4.00	0.00	0.00	0.00	0.00	0.00	0.00	0.00	1.00	0.00	0.00	0.00	0.00	0.00	0.00	63.00	43.00	56.00
maker-tulip_contig_934_pilon_pilon-augustus-gene-4.35-mRNA-1	1.00	3.00	1.00	1.00	3.00	0.00	3.00	2.00	0.00	3.00	1.00	3.00	14.00	1.00	7.00	1.00	0.00	2.00
augustus_masked-tulip_contig_3_pilon_pilon-processed-gene-1.5-mRNA-1	0.00	0.00	0.00	0.00	0.00	0.00	0.00	0.00	0.00	0.00	0.00	0.00	0.00	0.00	0.00	0.00	0.00	0.00
maker-tulip_contig_89_pilon_pilon-augustus-gene-3.28-mRNA-1	0.00	0.00	3.00	3.00	4.00	11.00	4.00	0.00	2.00	1.00	1.00	2.00	5.00	1.00	6.00	0.00	3.00	6.00
maker-tulip_contig_193_pilon_pilon-augustus-gene-0.19-mRNA-1	13.00	5.00	5.00	32.00	43.00	20.00	7.00	9.00	16.00	34.00	31.00	46.00	64.00	12.00	52.00	25.00	6.00	30.00
augustus_masked-tulip_contig_669_pilon_pilon-processed-gene-2.6-mRNA-1	0.00	0.00	0.00	0.00	0.00	0.00	0.00	0.00	0.00	0.00	0.00	0.00	0.00	0.00	0.00	0.00	0.00	0.00
maker-tulip_contig_704_pilon_pilon-augustus-gene-1.13-mRNA-1	212.00	186.93	205.00	125.00	135.00	155.00	118.00	117.00	67.00	172.00	154.00	143.00	334.00	54.00	222.00	105.00	59.00	118.00
augustus_masked-tulip_contig_584_pilon_pilon-processed-gene-3.102-mRNA-1	1.00	0.00	2.00	10.00	13.00	7.00	7.00	2.00	4.00	16.00	7.00	11.00	23.00	7.00	21.00	9.00	5.00	17.00
augustus_masked-tulip_contig_393_pilon_pilon-processed-gene-0.8-mRNA-1	1.00	1.22	1.00	0.00	0.00	2.00	0.00	0.00	0.50	1.00	0.00	2.29	0.00	0.00	0.00	0.99	0.00	1.00
maker-tulip_contig_340_pilon_pilon-augustus-gene-0.24-mRNA-1	357.00	404.00	370.00	81.00	103.00	95.00	117.00	112.00	59.00	247.00	235.00	249.00	1683.00	183.00	1034.00	250.00	94.00	156.00
maker-tulip_contig_514_pilon_pilon-augustus-gene-1.37-mRNA-1	1.00	2.00	4.00	95.00	82.00	115.00	64.00	31.00	27.00	37.00	39.00	45.00	122.00	20.00	77.00	60.00	22.00	121.00
augustus_masked-tulip_contig_81_pilon_pilon-processed-gene-5.7-mRNA-1	7.00	3.00	6.00	319.00	210.00	315.00	166.00	125.00	102.00	66.00	48.00	53.00	345.00	84.00	376.00	358.00	137.00	402.00
augustus_masked-tulip_contig_1_pilon_pilon-processed-gene-3.65-mRNA-1	61.00	79.00	58.00	98.00	77.00	62.00	65.00	43.00	40.00	314.00	259.00	281.00	323.00	53.00	217.00	218.00	89.00	196.00
augustus_masked-tulip_contig_619_pilon_pilon-processed-gene-1.45-mRNA-1	0.00	0.00	0.00	0.00	0.00	0.00	0.00	0.00	0.21	0.00	1.34	0.00	0.00	0.00	0.00	0.00	0.00	0.00
maker-tulip_contig_474_pilon_pilon-augustus-gene-3.11-mRNA-1	0.00	0.00	0.00	0.00	1.00	0.00	1.00	0.00	0.00	0.00	0.00	0.00	0.00	0.00	0.00	0.00	0.00	0.00
maker-tulip_contig_843_pilon_pilon-augustus-gene-0.1-mRNA-1	1825.00	1371.00	1799.00	1333.00	1444.00	1450.00	1884.00	2125.00	1400.00	651.00	525.00	625.00	2707.00	343.00	1443.00	569.00	240.00	641.00
maker-tulip_contig_236_pilon_pilon-augustus-gene-7.89-mRNA-1	2082.00	1776.00	2034.00	1441.00	1349.00	1488.00	1274.00	1044.00	814.00	1314.00	1240.00	1221.00	3561.00	410.00	2605.00	1517.00	633.00	2424.00
augustus_masked-tulip_contig_61_pilon_pilon-processed-gene-0.81-mRNA-1	282.00	345.00	483.00	154.00	205.00	229.00	219.00	514.00	178.00	171.00	129.00	165.00	656.00	74.00	427.00	87.00	22.00	57.00
augustus_masked-tulip_contig_697_pilon_pilon-processed-gene-1.30-mRNA-1	106.00	111.00	97.00	3.00	5.00	5.00	2.00	2.00	2.00	65.00	44.00	55.00	107.00	11.00	84.00	3.00	1.00	2.00
augustus_masked-tulip_contig_145_pilon_pilon-processed-gene-6.98-mRNA-1	260.00	234.00	278.00	399.00	379.00	370.00	227.00	216.00	201.00	614.00	479.00	568.00	1173.00	155.00	641.00	245.00	93.00	256.00
maker-tulip_contig_271_pilon_pilon-augustus-gene-1.43-mRNA-1	3.00	4.00	1.00	0.00	1.00	0.00	0.00	2.00	0.00	0.00	0.00	0.00	0.00	0.00	0.00	4.00	1.00	0.00
augustus_masked-tulip_contig_854_pilon_pilon-processed-gene-1.57-mRNA-1	0.00	0.00	0.00	0.00	0.00	0.00	0.00	0.00	0.00	0.00	0.00	0.00	0.00	0.00	0.00	0.00	0.00	0.00
maker-tulip_contig_891_pilon_pilon-augustus-gene-0.2-mRNA-1	5.00	4.00	11.02	0.00	0.00	0.00	0.00	0.00	0.00	167.78	95.30	258.16	0.00	0.00	0.00	0.00	0.00	0.00
maker-tulip_contig_331_pilon_pilon-augustus-gene-1.5-mRNA-1	1.00	0.00	2.00	1.00	0.00	0.00	0.00	0.00	0.00	0.00	0.00	0.00	0.00	0.00	0.00	0.00	0.00	0.00
maker-tulip_contig_1_pilon_pilon-augustus-gene-5.35-mRNA-1	55.00	43.00	57.00	802.00	827.00	915.00	202.00	266.00	113.00	162.00	108.00	164.00	1382.00	231.00	934.00	323.00	77.00	462.00
maker-tulip_contig_196_pilon_pilon-augustus-gene-1.38-mRNA-1	7.00	9.00	7.00	13.00	6.00	10.00	3.00	3.00	6.00	19.00	12.00	25.00	76.00	9.00	23.00	25.00	9.00	25.00
maker-tulip_contig_547_pilon_pilon-augustus-gene-6.42-mRNA-1	0.00	0.00	1.00	3.00	0.00	1.00	3.00	2.00	0.00	13.00	4.00	15.00	0.00	1.00	5.00	1.00	1.00	3.00
maker-tulip_contig_317_pilon_pilon-augustus-gene-1.63-mRNA-1	5.31	6.83	4.21	0.00	0.00	0.00	0.72	0.00	0.50	1.44	0.00	2.20	0.00	0.00	1.34	0.00	2.04	0.00
maker-tulip_contig_92_pilon_pilon-augustus-gene-0.0-mRNA-1	0.00	0.00	1.00	1.00	5.00	2.00	2.00	1.00	0.00	6.00	1.00	0.00	1.00	0.00	0.00	0.00	0.00	0.00
augustus_masked-tulip_contig_147_pilon_pilon-processed-gene-0.3-mRNA-1	0.00	0.00	0.00	0.00	0.00	0.00	0.00	0.00	0.00	0.00	0.00	0.00	0.00	0.00	0.00	0.00	0.00	1.00
augustus_masked-tulip_contig_173_pilon_pilon-processed-gene-0.7-mRNA-1	2.00	0.00	1.00	2.00	6.00	2.00	8.00	2.00	4.00	677.00	224.00	229.00	226.00	22.00	131.00	225.00	66.00	277.00
augustus_masked-tulip_contig_152_pilon_pilon-processed-gene-0.35-mRNA-1	0.00	1.00	0.00	0.00	1.00	0.00	0.00	0.00	0.00	3.00	3.00	1.00	0.00	0.00	1.00	3.00	0.00	1.00
maker-tulip_contig_394_pilon_pilon-augustus-gene-0.10-mRNA-1	0.00	0.00	0.00	8.00	9.00	6.00	1.00	1.00	2.00	0.00	0.00	2.00	1.00	0.00	0.00	1.00	0.00	0.00
maker-tulip_contig_645_pilon_pilon-augustus-gene-3.25-mRNA-1	5.00	13.00	5.00	26.00	26.00	16.00	6.00	12.00	12.00	43.00	26.00	24.00	89.00	19.00	53.00	12.00	2.00	22.00
maker-tulip_contig_516_pilon_pilon-augustus-gene-3.7-mRNA-1	77.00	112.00	74.00	83.00	66.00	81.00	458.00	237.00	299.00	1109.00	635.00	1013.00	1757.00	246.00	925.00	437.00	134.00	329.00
augustus_masked-tulip_contig_523_pilon_pilon-processed-gene-0.48-mRNA-1	0.00	0.00	1.00	0.00	1.00	3.00	2.00	1.00	1.00	6.00	0.00	0.00	0.00	0.00	0.00	1.00	0.00	1.00
augustus_masked-tulip_contig_4_pilon_pilon-processed-gene-1.61-mRNA-1	0.00	7.00	4.00	2.00	6.00	3.00	3.00	8.00	1.00	2.00	0.00	1.00	5.00	1.00	1.00	2.00	2.00	2.00
maker-tulip_contig_507_pilon_pilon-augustus-gene-2.68-mRNA-1	0.00	0.00	0.00	0.00	0.00	0.00	0.00	0.00	0.00	0.00	0.00	0.00	0.00	0.00	1.00	47.00	16.00	42.00
augustus_masked-tulip_contig_3_pilon_pilon-processed-gene-4.13-mRNA-1	2.00	1.00	5.00	25.00	22.00	21.00	1.00	2.00	2.00	1.00	1.00	4.00	18.00	1.00	7.00	31.00	21.00	47.00
maker-tulip_contig_114_pilon_pilon-augustus-gene-0.2-mRNA-1	971.00	1296.00	1203.00	21.00	14.00	16.00	93.00	86.00	91.00	384.00	329.00	394.00	1802.00	235.00	1379.00	12.00	4.00	0.00
maker-tulip_contig_731_pilon_pilon-augustus-gene-0.41-mRNA-1	808.00	799.00	756.00	68.00	114.00	111.00	132.00	150.00	65.00	209.00	133.00	130.00	479.00	65.00	317.00	76.00	34.00	87.00
maker-tulip_contig_584_pilon_pilon-augustus-gene-3.22-mRNA-1	0.00	0.00	0.00	0.00	0.00	0.00	0.00	0.00	0.00	0.00	0.00	0.00	0.00	0.00	0.00	0.00	0.00	0.00
augustus_masked-tulip_contig_537_pilon_pilon-processed-gene-1.36-mRNA-1	3.48	1.70	4.29	34.64	31.64	27.32	29.58	28.00	22.21	74.48	71.18	89.85	35.82	1.66	31.38	35.45	20.01	54.00
maker-tulip_contig_209_pilon_pilon-augustus-gene-1.23-mRNA-1	3.00	11.00	8.00	28.00	41.00	57.00	43.00	44.00	41.00	160.00	114.00	144.00	61.00	10.00	51.00	30.00	12.00	38.00
maker-tulip_contig_33_pilon_pilon-augustus-gene-3.56-mRNA-1	839.00	447.00	582.00	197.00	276.00	242.00	261.00	316.00	175.00	245.00	182.00	241.00	632.00	74.00	362.00	127.00	44.00	95.00
augustus_masked-tulip_contig_343_pilon_pilon-processed-gene-0.84-mRNA-1	806.00	682.00	646.00	52.00	56.00	72.00	72.00	120.00	59.00	157.00	69.00	84.00	228.00	31.00	123.00	26.00	16.00	21.00
augustus_masked-tulip_contig_583_pilon_pilon-processed-gene-0.27-mRNA-1	0.00	3.00	0.00	1.00	1.00	0.00	0.00	0.00	0.00	1.00	0.00	1.00	3.00	0.00	0.00	0.00	0.00	0.00
augustus_masked-tulip_contig_374_pilon_pilon-processed-gene-0.5-mRNA-1	0.00	0.00	0.00	0.00	0.00	0.00	0.00	0.00	1.00	1.00	0.00	0.00	1.00	0.00	0.00	0.00	0.00	0.00
augustus_masked-tulip_contig_318_pilon_pilon-processed-gene-0.66-mRNA-1	54.00	37.00	69.00	41.00	47.00	46.00	31.00	43.00	20.00	157.00	126.00	147.00	128.00	17.00	83.00	25.00	15.00	30.00
maker-tulip_contig_424_pilon_pilon-augustus-gene-2.5-mRNA-1	71.33	47.73	55.30	24.21	33.35	37.28	39.78	29.35	28.75	15.52	7.88	15.47	62.88	10.85	42.48	27.92	5.41	22.30
maker-tulip_contig_381_pilon_pilon-augustus-gene-0.103-mRNA-1	12.00	5.00	12.00	33.00	29.00	37.00	29.00	14.00	16.00	69.00	38.00	38.00	109.00	19.00	47.00	46.00	28.00	28.00
augustus_masked-tulip_contig_420_pilon_pilon-processed-gene-2.30-mRNA-1	68.00	23.00	49.00	587.00	463.00	654.00	546.00	322.00	341.00	437.00	446.00	466.00	510.00	70.00	251.00	450.00	241.00	660.00
augustus_masked-tulip_contig_773_pilon_pilon-processed-gene-2.14-mRNA-1	0.00	0.00	0.00	59.00	71.00	72.00	2.00	4.00	2.00	1.00	0.00	0.00	0.00	0.00	0.00	3.00	4.00	2.00
maker-tulip_contig_583_pilon_pilon-augustus-gene-0.14-mRNA-1	121.00	18.00	168.00	676.00	801.00	824.00	1189.00	1241.00	758.00	279.00	161.00	251.00	829.00	114.00	412.00	168.00	75.00	218.00
maker-tulip_contig_843_pilon_pilon-augustus-gene-7.5-mRNA-1	0.00	0.00	0.00	0.00	0.00	0.00	0.00	0.00	0.00	0.00	0.00	0.00	0.00	0.00	0.00	0.00	0.00	1.00
maker-tulip_contig_674_pilon_pilon-augustus-gene-3.7-mRNA-1	6.00	4.00	5.00	314.00	519.00	315.00	324.00	289.00	197.00	321.00	393.00	290.00	620.00	82.00	48.00	91.00	28.00	48.00
maker-tulip_contig_281_pilon_pilon-augustus-gene-3.0-mRNA-1	522.00	604.00	481.00	2790.00	2954.00	3252.00	3190.00	2828.00	2065.00	523.00	444.00	500.00	9408.00	837.00	3039.00	6036.00	2025.00	6285.00
maker-tulip_contig_362_pilon_pilon-augustus-gene-1.19-mRNA-1	75.00	43.00	46.00	152.00	113.00	140.00	120.00	107.00	118.00	305.00	206.00	201.00	1449.00	221.00	1239.00	1482.00	733.00	1705.00
augustus_masked-tulip_contig_159_pilon_pilon-processed-gene-2.40-mRNA-1	0.00	0.00	0.00	0.00	0.00	0.00	0.00	0.00	0.00	0.00	0.00	0.00	0.00	0.00	3.00	2924.00	3580.00	6971.00
augustus_masked-tulip_contig_586_pilon_pilon-processed-gene-5.15-mRNA-1	10.87	4.00	0.00	0.00	0.00	2.89	2.03	0.00	0.00	0.00	1.00	0.00	2.00	0.00	1.33	0.00	0.00	0.00
maker-tulip_contig_346_pilon_pilon-augustus-gene-0.2-mRNA-1	0.00	0.00	2.00	5.00	1.00	0.00	1.00	1.00	1.00	2.00	1.00	1.00	5.00	0.00	0.00	1.00	1.00	0.00
augustus_masked-tulip_contig_931_pilon_pilon-processed-gene-1.9-mRNA-1	14.00	4.00	9.00	818.00	839.00	714.00	698.00	472.00	342.00	103.00	47.00	58.00	782.00	86.00	319.00	696.00	219.00	647.00
maker-tulip_contig_234_pilon_pilon-augustus-gene-1.36-mRNA-1	0.00	3.00	0.00	4.00	9.00	9.00	0.00	2.00	1.00	0.00	0.00	3.00	16.00	2.00	13.00	2.00	1.00	2.00
maker-tulip_contig_860_pilon_pilon-augustus-gene-3.23-mRNA-1	0.00	0.00	1.00	1.00	1.00	0.00	0.00	0.00	0.00	0.00	0.00	0.00	0.00	0.00	0.00	12.00	8.00	10.00
maker-tulip_contig_281_pilon_pilon-augustus-gene-3.38-mRNA-1	519.00	342.00	428.00	63.00	79.00	69.00	88.00	147.00	49.00	113.00	74.00	78.00	128.00	12.00	68.00	66.00	12.00	40.00
maker-tulip_contig_474_pilon_pilon-augustus-gene-0.19-mRNA-1	133.00	136.00	155.00	347.00	350.00	309.00	344.00	283.00	182.00	196.00	141.00	198.00	954.00	115.00	617.00	581.00	151.00	652.00
maker-tulip_contig_211_pilon_pilon-augustus-gene-2.27-mRNA-1	5.00	20.00	12.00	1442.00	1582.00	1457.00	259.00	266.00	182.00	48.00	43.00	36.00	132.00	14.00	77.00	195.00	58.00	110.00
maker-tulip_contig_145_pilon_pilon-augustus-gene-2.59-mRNA-1	0.00	0.00	0.00	24.00	22.00	12.00	26.00	30.00	20.00	0.00	0.00	0.00	1.00	0.00	1.00	26.00	18.00	31.00
maker-tulip_contig_39_pilon_pilon-augustus-gene-1.161-mRNA-1	0.00	1.00	0.00	23553.00	19662.00	19890.00	7798.00	5609.00	5158.00	9426.00	8168.00	9158.00	1567.00	196.00	1032.00	2233.00	847.00	1681.00
augustus_masked-tulip_contig_598_pilon_pilon-processed-gene-0.13-mRNA-1	0.00	3.00	0.00	2.00	0.00	1.00	0.00	1.00	1.00	1.00	3.00	4.00	4.00	0.00	1.00	13.00	3.00	11.00
maker-tulip_contig_388_pilon_pilon-augustus-gene-0.18-mRNA-1	791.00	619.00	723.00	585.00	677.00	654.00	524.00	437.00	295.00	704.00	548.00	601.00	1300.00	193.00	916.00	627.00	226.00	569.00
augustus_masked-tulip_contig_632_pilon_pilon-processed-gene-1.8-mRNA-1	190.00	209.00	145.00	123.00	182.00	160.00	160.00	161.00	170.00	94.00	83.00	121.00	323.00	43.00	233.00	152.00	63.00	169.00
maker-tulip_contig_354_pilon_pilon-augustus-gene-0.22-mRNA-1	101.00	98.00	102.00	63.00	82.00	58.00	72.00	58.00	41.00	92.00	114.00	89.00	263.00	21.00	162.00	165.00	63.00	111.00
maker-tulip_contig_402_pilon_pilon-augustus-gene-1.21-mRNA-1	134.00	112.00	133.00	55.00	51.00	31.00	31.00	27.00	12.00	32.00	40.00	32.00	229.00	31.00	191.00	23.00	7.00	22.00
maker-tulip_contig_527_pilon_pilon-augustus-gene-3.36-mRNA-1	0.00	0.00	0.00	2049.00	1785.00	1908.00	1093.00	907.00	636.00	555.00	597.00	725.00	829.00	102.00	430.00	413.00	157.00	481.00
maker-tulip_contig_407_pilon_pilon-augustus-gene-4.67-mRNA-1	71.00	97.00	44.00	56.00	52.00	33.00	29.00	45.00	22.00	85.00	62.00	71.00	258.00	32.00	190.00	44.00	20.00	43.00
maker-tulip_contig_781_pilon_pilon-augustus-gene-4.28-mRNA-1	0.00	4.00	1.00	72.00	117.75	94.00	205.00	130.00	100.00	38.00	20.16	23.00	80.00	4.00	90.00	166.00	57.00	207.00
maker-tulip_contig_567_pilon_pilon-augustus-gene-0.2-mRNA-1	2.00	10.00	8.00	752.00	632.00	801.00	548.00	407.00	362.00	183.00	190.00	170.00	597.00	63.00	371.00	473.00	234.00	541.00
maker-tulip_contig_175_pilon_pilon-augustus-gene-4.43-mRNA-1	175.00	186.00	213.00	139.00	186.00	157.00	120.00	86.00	94.00	140.00	109.00	123.00	289.00	42.00	216.00	110.00	36.00	125.00
augustus_masked-tulip_contig_704_pilon_pilon-processed-gene-1.31-mRNA-1	1.00	2.00	2.00	24.00	50.00	49.00	38.00	24.00	11.00	70.00	74.00	77.00	99.00	17.00	67.00	37.00	17.00	66.00
augustus_masked-tulip_contig_343_pilon_pilon-processed-gene-0.104-mRNA-1	0.00	0.00	1.00	2.00	3.00	1.00	1.00	1.00	0.00	2.00	1.00	0.00	28.00	7.00	7.00	3.00	3.00	2.00
augustus_masked-tulip_contig_862_pilon_pilon-processed-gene-1.11-mRNA-1	162.00	177.00	186.00	93.00	70.00	74.00	57.00	45.00	42.00	351.00	286.00	329.00	436.00	69.00	343.00	151.00	53.00	142.00
maker-tulip_contig_209_pilon_pilon-augustus-gene-2.16-mRNA-1	0.33	0.00	0.33	1.00	0.00	1.00	0.67	0.33	0.00	1.33	0.00	0.33	1.67	0.00	0.00	0.67	0.00	1.00
maker-tulip_contig_56_pilon_pilon-augustus-gene-0.20-mRNA-1	0.00	0.00	0.00	376.00	1831.00	725.00	282.00	283.00	371.00	333.00	580.00	156.00	13.00	2.00	22.00	3.00	4.00	11.00
augustus_masked-tulip_contig_907_pilon_pilon-processed-gene-8.34-mRNA-1	2.00	0.00	0.00	0.00	0.00	0.00	0.00	0.00	0.00	0.00	0.00	0.00	0.00	0.00	1.00	0.00	0.00	0.00
augustus_masked-tulip_contig_23_pilon_pilon-processed-gene-0.11-mRNA-1	318.00	254.00	241.00	117.00	155.00	142.00	178.00	176.00	97.00	97.00	43.00	60.00	210.00	34.00	190.00	43.00	23.00	62.00
augustus_masked-tulip_contig_529_pilon_pilon-processed-gene-1.56-mRNA-1	32.00	6.00	22.00	724.00	630.00	724.00	452.00	374.00	291.00	305.00	275.00	306.00	745.00	91.00	497.00	691.00	335.00	922.00
maker-tulip_contig_112_pilon_pilon-augustus-gene-3.69-mRNA-1	0.00	0.00	0.00	0.00	0.00	0.00	0.00	0.00	0.00	0.00	0.00	0.00	0.00	0.00	0.00	0.00	0.00	0.00
maker-tulip_contig_604_pilon_pilon-augustus-gene-2.0-mRNA-1	10.74	8.05	6.71	37.06	45.62	25.94	18.93	12.22	6.59	49.31	14.41	15.75	59.03	7.15	41.28	15.75	5.61	26.24
augustus_masked-tulip_contig_556_pilon_pilon-processed-gene-0.34-mRNA-1	0.00	0.00	0.00	0.00	1.00	3.00	2.00	0.00	0.00	0.00	0.00	0.00	1.00	1.00	0.00	0.00	0.00	1.00
augustus_masked-tulip_contig_714_pilon_pilon-processed-gene-0.99-mRNA-1	0.00	0.00	0.00	37.00	15.00	16.00	62.00	55.00	47.00	63.00	43.00	28.00	157.00	9.00	87.00	168.00	18.00	101.00
augustus_masked-tulip_contig_147_pilon_pilon-processed-gene-0.0-mRNA-1	0.00	0.00	0.00	0.00	0.00	0.00	0.00	1.00	2.00	0.00	0.00	0.00	0.00	0.00	0.00	56.00	15.00	50.00
maker-tulip_contig_336_pilon_pilon-augustus-gene-0.27-mRNA-1	312.00	482.00	418.00	450.00	541.00	510.00	387.00	436.00	209.00	935.00	546.00	752.00	1269.00	166.00	669.00	479.00	163.00	458.00
maker-tulip_contig_572_pilon_pilon-augustus-gene-0.20-mRNA-1	104.00	42.00	76.00	82.00	98.00	89.00	84.00	91.00	66.00	119.00	81.00	110.00	318.00	55.00	201.00	27.00	12.00	42.00
maker-tulip_contig_217_pilon_pilon-augustus-gene-0.36-mRNA-1	139.00	121.00	131.00	92.00	139.00	131.00	166.00	174.00	120.00	105.00	120.00	111.00	812.00	115.00	457.00	57.00	20.00	81.00
augustus_masked-tulip_contig_46_pilon_pilon-processed-gene-1.18-mRNA-1	0.00	0.00	0.00	0.00	0.00	0.00	0.00	0.00	0.00	0.00	0.00	0.00	0.00	0.00	0.00	193.00	159.00	242.00
maker-tulip_contig_479_pilon_pilon-augustus-gene-2.5-mRNA-1	0.00	0.00	0.00	422.00	448.00	509.00	4488.00	2037.00	2485.00	1.00	6.00	24.00	925.00	93.00	727.00	1569.00	387.00	1120.00
maker-tulip_contig_351_pilon_pilon-augustus-gene-1.0-mRNA-1	70.00	58.00	93.00	23.00	36.00	22.00	110.00	68.00	52.00	28.00	27.00	41.00	185.00	22.00	133.00	20.00	4.00	45.00
augustus_masked-tulip_contig_683_pilon_pilon-processed-gene-0.0-mRNA-1	0.00	0.00	2.78	0.00	0.00	0.00	12.25	0.30	0.00	25.20	0.00	25.51	14.09	6.15	0.00	0.00	0.00	0.39
maker-tulip_contig_603_pilon_pilon-augustus-gene-4.23-mRNA-1	73.00	95.00	80.00	135.00	146.00	165.00	173.00	140.00	101.00	91.00	70.00	72.00	383.00	51.00	259.00	158.00	79.00	159.00
maker-tulip_contig_209_pilon_pilon-augustus-gene-1.24-mRNA-1	0.00	0.00	0.00	0.00	0.00	0.00	0.00	0.00	0.00	0.00	0.00	0.00	0.00	0.00	0.00	0.00	0.00	0.00
augustus_masked-tulip_contig_715_pilon_pilon-processed-gene-0.48-mRNA-1	0.00	0.00	0.00	0.00	0.00	0.00	0.00	0.00	0.00	57.98	40.64	52.28	120.82	25.37	16.25	6.19	10.31	19.03
augustus_masked-tulip_contig_198_pilon_pilon-processed-gene-2.4-mRNA-1	145.00	99.00	98.00	170.00	175.00	159.00	131.00	51.00	107.00	222.00	247.00	279.00	1210.00	166.00	768.00	400.00	162.00	390.00
augustus_masked-tulip_contig_636_pilon_pilon-processed-gene-0.2-mRNA-1	1147.00	991.00	1112.00	207.00	197.00	274.00	247.00	196.00	140.00	510.00	413.00	531.00	1105.00	114.00	621.00	381.00	188.00	458.00
maker-tulip_contig_806_pilon_pilon-augustus-gene-2.18-mRNA-1	1.00	5.00	4.00	0.00	0.00	1.00	0.00	0.00	0.00	0.00	0.00	0.00	392.00	66.00	157.00	18.00	2.00	17.00
maker-tulip_contig_645_pilon_pilon-augustus-gene-0.29-mRNA-1	808.00	1338.00	831.00	378.00	375.00	417.00	208.00	168.00	167.00	655.00	639.00	608.00	4317.00	643.00	3003.00	629.00	314.00	763.00
maker-tulip_contig_407_pilon_pilon-augustus-gene-4.33-mRNA-1	20.00	33.00	9.00	203.00	146.00	147.00	73.00	43.00	50.00	81.00	67.00	71.00	307.00	39.00	138.00	116.00	62.00	178.00
maker-tulip_contig_31_pilon_pilon-augustus-gene-1.57-mRNA-1	8.00	9.00	20.00	20.00	13.00	15.00	8.00	14.00	4.00	23.00	16.00	6.00	7.00	2.00	12.00	10.00	5.00	9.00
augustus_masked-tulip_contig_372_pilon_pilon-processed-gene-0.30-mRNA-1	0.00	0.00	0.00	0.00	0.00	0.00	0.00	0.00	0.00	0.00	0.00	0.00	0.00	0.00	0.00	0.00	0.00	0.00
maker-tulip_contig_121_pilon_pilon-augustus-gene-4.34-mRNA-1	0.00	0.00	0.00	0.00	0.00	1.00	3.00	7.00	0.00	0.00	0.00	0.00	2.00	0.00	1.00	0.00	0.00	3.00
augustus_masked-tulip_contig_715_pilon_pilon-processed-gene-0.29-mRNA-1	0.00	0.00	0.00	0.00	0.00	0.00	0.00	0.00	0.00	0.00	0.00	0.00	0.00	0.00	0.00	0.00	0.00	0.00
augustus_masked-tulip_contig_829_pilon_pilon-processed-gene-1.0-mRNA-1	0.00	0.00	0.00	0.00	0.00	0.00	0.00	0.00	0.00	0.00	0.00	0.00	0.61	2.16	0.00	0.00	0.00	0.00
maker-tulip_contig_194_pilon_pilon-augustus-gene-1.10-mRNA-1	410.00	526.00	479.00	1866.00	1443.00	1784.00	1614.00	1479.00	1005.00	1549.00	1187.00	1312.00	2267.00	326.00	1487.00	857.00	417.00	959.00
maker-tulip_contig_519_pilon_pilon-augustus-gene-2.79-mRNA-1	12.00	11.00	12.00	54.00	56.00	46.00	30.00	51.00	33.00	96.00	47.00	85.00	105.00	20.00	71.00	30.00	20.00	62.00
augustus_masked-tulip_contig_279_pilon_pilon-processed-gene-3.9-mRNA-1	0.00	0.00	0.00	53.00	65.00	36.00	5.00	6.00	6.00	1.00	0.00	2.00	2.00	0.00	6.00	5.00	0.00	0.00
maker-tulip_contig_93_pilon_pilon-augustus-gene-0.2-mRNA-1	430.00	358.00	375.00	2403.00	2069.00	2345.00	1963.00	1685.00	1350.00	2555.00	1667.00	1856.00	2911.00	378.00	1891.00	2838.00	999.00	2183.00
maker-tulip_contig_89_pilon_pilon-augustus-gene-4.24-mRNA-1	0.00	0.00	0.00	0.00	0.00	0.00	0.00	0.00	0.00	0.00	0.00	0.00	0.00	0.00	0.00	0.00	0.00	0.00
maker-tulip_contig_715_pilon_pilon-augustus-gene-5.87-mRNA-1	0.00	0.00	0.00	2.00	2.00	2.00	1.00	0.00	1.00	7.00	0.00	3.00	5.00	0.00	0.00	3.00	0.00	1.00
augustus_masked-tulip_contig_572_pilon_pilon-processed-gene-0.78-mRNA-1	0.00	0.00	0.00	0.00	0.00	0.00	0.00	0.00	0.00	0.00	0.00	0.00	0.00	0.00	0.00	0.00	0.00	0.00
maker-tulip_contig_77_pilon_pilon-augustus-gene-0.70-mRNA-1	38.00	32.00	32.00	12.00	21.00	19.00	10.00	10.00	2.00	7.00	4.00	7.00	10.00	1.00	5.00	1.00	3.00	2.00
maker-tulip_contig_280_pilon_pilon-augustus-gene-2.27-mRNA-1	0.00	0.00	0.00	3.00	5.00	1.00	1.00	0.00	1.00	3.00	0.00	0.00	1.00	0.00	0.00	0.00	0.00	0.00
maker-tulip_contig_217_pilon_pilon-augustus-gene-1.162-mRNA-1	0.00	0.00	0.00	3.00	1.00	4.00	38.00	32.00	60.00	2.00	23.00	0.00	0.00	0.00	3.00	0.00	0.00	28.00
augustus_masked-tulip_contig_767_pilon_pilon-processed-gene-0.12-mRNA-1	0.00	0.00	0.00	59.00	22.00	24.00	33.00	22.00	16.00	0.00	0.00	0.00	6.00	3.00	15.00	9.00	4.00	2.00
maker-tulip_contig_819_pilon_pilon-augustus-gene-0.33-mRNA-1	92.00	90.00	96.00	88.00	96.00	88.00	68.00	69.00	31.00	220.00	193.00	226.00	353.00	50.00	222.00	166.00	77.00	193.00
maker-tulip_contig_407_pilon_pilon-augustus-gene-8.86-mRNA-1	0.00	0.00	0.00	0.00	0.00	0.00	0.00	0.00	0.00	0.00	0.00	0.00	0.00	0.00	1.00	417.00	318.00	716.00
maker-tulip_contig_345_pilon_pilon-augustus-gene-1.66-mRNA-1	0.00	0.00	0.00	3.00	5.00	2.00	3.00	4.00	1.00	18.00	38.00	33.00	0.00	0.00	0.00	0.00	0.00	0.00
augustus_masked-tulip_contig_691_pilon_pilon-processed-gene-4.95-mRNA-1	416.00	262.00	299.00	63.00	68.00	48.00	20.00	17.00	20.00	92.00	39.00	65.00	90.00	12.00	51.00	54.00	16.00	42.00
maker-tulip_contig_59_pilon_pilon-augustus-gene-2.67-mRNA-1	0.00	0.00	0.00	2.00	0.00	1.00	2.00	0.00	0.00	0.00	0.00	0.00	0.00	0.00	0.00	0.00	0.00	0.00
augustus_masked-tulip_contig_290_pilon_pilon-processed-gene-0.38-mRNA-1	150.00	99.00	176.00	117.00	133.00	126.00	90.00	46.00	75.00	134.00	160.00	152.00	354.00	51.00	263.00	125.00	64.00	189.00
maker-tulip_contig_674_pilon_pilon-augustus-gene-7.34-mRNA-1	95.00	76.00	97.00	268.00	312.00	223.00	366.00	321.00	262.00	97.00	68.00	83.00	384.00	49.00	256.00	67.00	22.00	50.00
augustus_masked-tulip_contig_331_pilon_pilon-processed-gene-2.27-mRNA-1	623.00	543.00	585.00	1590.00	1703.00	1746.00	1860.00	2075.00	1309.00	490.00	412.00	420.00	3979.00	447.00	2294.00	1224.00	643.00	1462.00
augustus_masked-tulip_contig_740_pilon_pilon-processed-gene-2.10-mRNA-1	14.61	6.33	10.02	12.80	7.81	8.16	9.23	2.57	8.69	12.66	5.81	9.15	3.46	0.00	3.67	6.66	1.00	7.73
augustus_masked-tulip_contig_515_pilon_pilon-processed-gene-1.13-mRNA-1	0.00	0.00	0.00	1.00	1.00	2.00	40.00	41.00	16.00	16.00	13.00	23.00	0.00	0.00	0.00	0.00	0.00	0.00
augustus_masked-tulip_contig_702_pilon_pilon-processed-gene-0.34-mRNA-1	18.00	19.00	30.00	90.00	107.00	92.00	30.00	38.00	35.00	89.00	71.00	108.00	206.00	36.00	137.00	57.00	19.00	39.00
maker-tulip_contig_272_pilon_pilon-augustus-gene-5.81-mRNA-1	64.00	35.00	56.00	196.00	167.00	140.00	51.00	67.00	42.00	78.00	63.00	78.00	170.00	17.00	98.00	84.00	27.00	77.00
maker-tulip_contig_474_pilon_pilon-augustus-gene-0.60-mRNA-1	29.00	71.00	47.00	157.00	98.00	98.00	130.00	168.00	91.00	1457.00	678.00	811.00	520.00	79.00	226.00	565.00	150.00	324.00
maker-tulip_contig_331_pilon_pilon-augustus-gene-2.0-mRNA-1	33129.00	34167.00	39758.00	5842.00	6036.00	6256.00	7289.00	6441.00	5684.00	4023.00	3778.00	5255.00	11660.00	1406.00	7572.00	2347.00	1190.00	2266.00
maker-tulip_contig_407_pilon_pilon-augustus-gene-0.33-mRNA-1	232.00	235.00	284.00	99.00	69.00	87.00	85.00	58.00	59.00	147.00	130.00	142.00	797.00	103.00	521.00	143.00	40.00	106.00
augustus_masked-tulip_contig_333_pilon_pilon-processed-gene-1.68-mRNA-1	143.00	80.00	81.00	10.00	12.00	14.00	25.00	28.00	17.00	11.00	4.00	2.00	43.00	3.00	27.00	1.00	1.00	0.00
maker-tulip_contig_3_pilon_pilon-augustus-gene-5.18-mRNA-1	18.00	13.00	17.00	209.24	220.00	178.00	132.00	90.00	65.00	187.00	136.20	170.00	417.00	52.00	308.00	203.24	73.00	222.00
maker-tulip_contig_132_pilon_pilon-augustus-gene-1.49-mRNA-1	0.00	0.00	1.00	2.00	2.00	1.00	3.00	1.00	0.00	1.00	3.00	0.00	1.00	0.00	1.00	0.00	0.00	0.00
augustus_masked-tulip_contig_668_pilon_pilon-processed-gene-0.28-mRNA-1	3.00	0.00	0.00	0.00	0.00	0.00	0.00	0.00	0.00	0.00	0.00	0.00	0.00	0.00	0.00	0.00	0.00	0.00
augustus_masked-tulip_contig_318_pilon_pilon-processed-gene-3.41-mRNA-1	14.74	14.77	4.28	2.35	1.54	0.00	1.51	4.48	0.00	1.53	1.49	3.02	2.89	0.00	0.00	2.27	0.00	0.00
maker-tulip_contig_196_pilon_pilon-augustus-gene-2.14-mRNA-1	0.00	0.00	0.00	53.00	124.00	58.00	16.00	13.00	8.00	3.00	3.00	2.00	4.00	1.00	8.00	13.00	4.00	14.00
augustus_masked-tulip_contig_493_pilon_pilon-processed-gene-1.5-mRNA-1	0.00	0.00	0.00	0.00	0.00	0.00	0.00	0.00	0.00	0.00	0.00	0.00	0.00	0.00	0.00	0.00	0.00	2.00
augustus_masked-tulip_contig_236_pilon_pilon-processed-gene-4.0-mRNA-1	52.00	42.00	44.00	227.00	237.00	226.00	121.00	101.00	92.00	336.00	217.00	293.00	455.00	55.00	244.00	184.00	68.00	200.00
augustus_masked-tulip_contig_381_pilon_pilon-processed-gene-0.33-mRNA-1	0.00	0.00	0.00	0.00	0.00	0.00	0.00	0.00	0.00	0.00	0.00	0.00	0.00	0.00	0.00	0.00	0.00	0.00
maker-tulip_contig_518_pilon_pilon-augustus-gene-0.2-mRNA-1	47.99	8.36	21.46	0.00	0.00	0.00	0.00	0.00	0.00	0.00	0.00	0.00	0.00	0.00	0.00	0.00	0.00	0.00
maker-tulip_contig_515_pilon_pilon-augustus-gene-7.16-mRNA-1	65.00	56.00	81.00	307.00	439.00	336.00	291.00	219.00	187.00	549.00	451.00	578.00	788.00	83.00	416.00	180.00	73.00	169.00
maker-tulip_contig_781_pilon_pilon-augustus-gene-1.18-mRNA-1	0.00	6.00	1.00	5.00	1.00	2.00	1.00	1.00	2.00	6.00	5.00	9.00	8.00	0.00	6.00	4.00	0.00	5.00
maker-tulip_contig_632_pilon_pilon-augustus-gene-2.0-mRNA-1	0.00	0.00	0.00	0.00	0.00	0.00	0.00	0.00	0.00	0.00	0.00	0.00	0.00	0.00	0.00	0.00	0.00	0.00
maker-tulip_contig_327_pilon_pilon-augustus-gene-6.0-mRNA-1	485.00	352.00	489.00	288.00	282.00	282.00	169.00	230.00	131.00	402.00	347.00	433.00	603.00	86.00	318.00	94.00	61.00	126.00
maker-tulip_contig_477_pilon_pilon-augustus-gene-0.29-mRNA-1	6031.00	6510.00	6876.00	633.00	657.00	783.00	864.00	770.00	525.00	1354.00	954.00	1198.00	2420.00	340.00	1805.00	671.00	203.00	445.00
augustus_masked-tulip_contig_211_pilon_pilon-processed-gene-1.5-mRNA-1	61.00	57.00	40.00	38.00	43.00	23.00	45.00	27.00	21.00	89.00	60.00	76.00	147.00	15.00	54.00	31.00	24.00	40.00
[truncated: 16,480 more rows]
