# Supplementary material
Source: publisher figshare collection journal article supplement (https://gsajournals.figshare.com/articles/dataset/_/14995326)

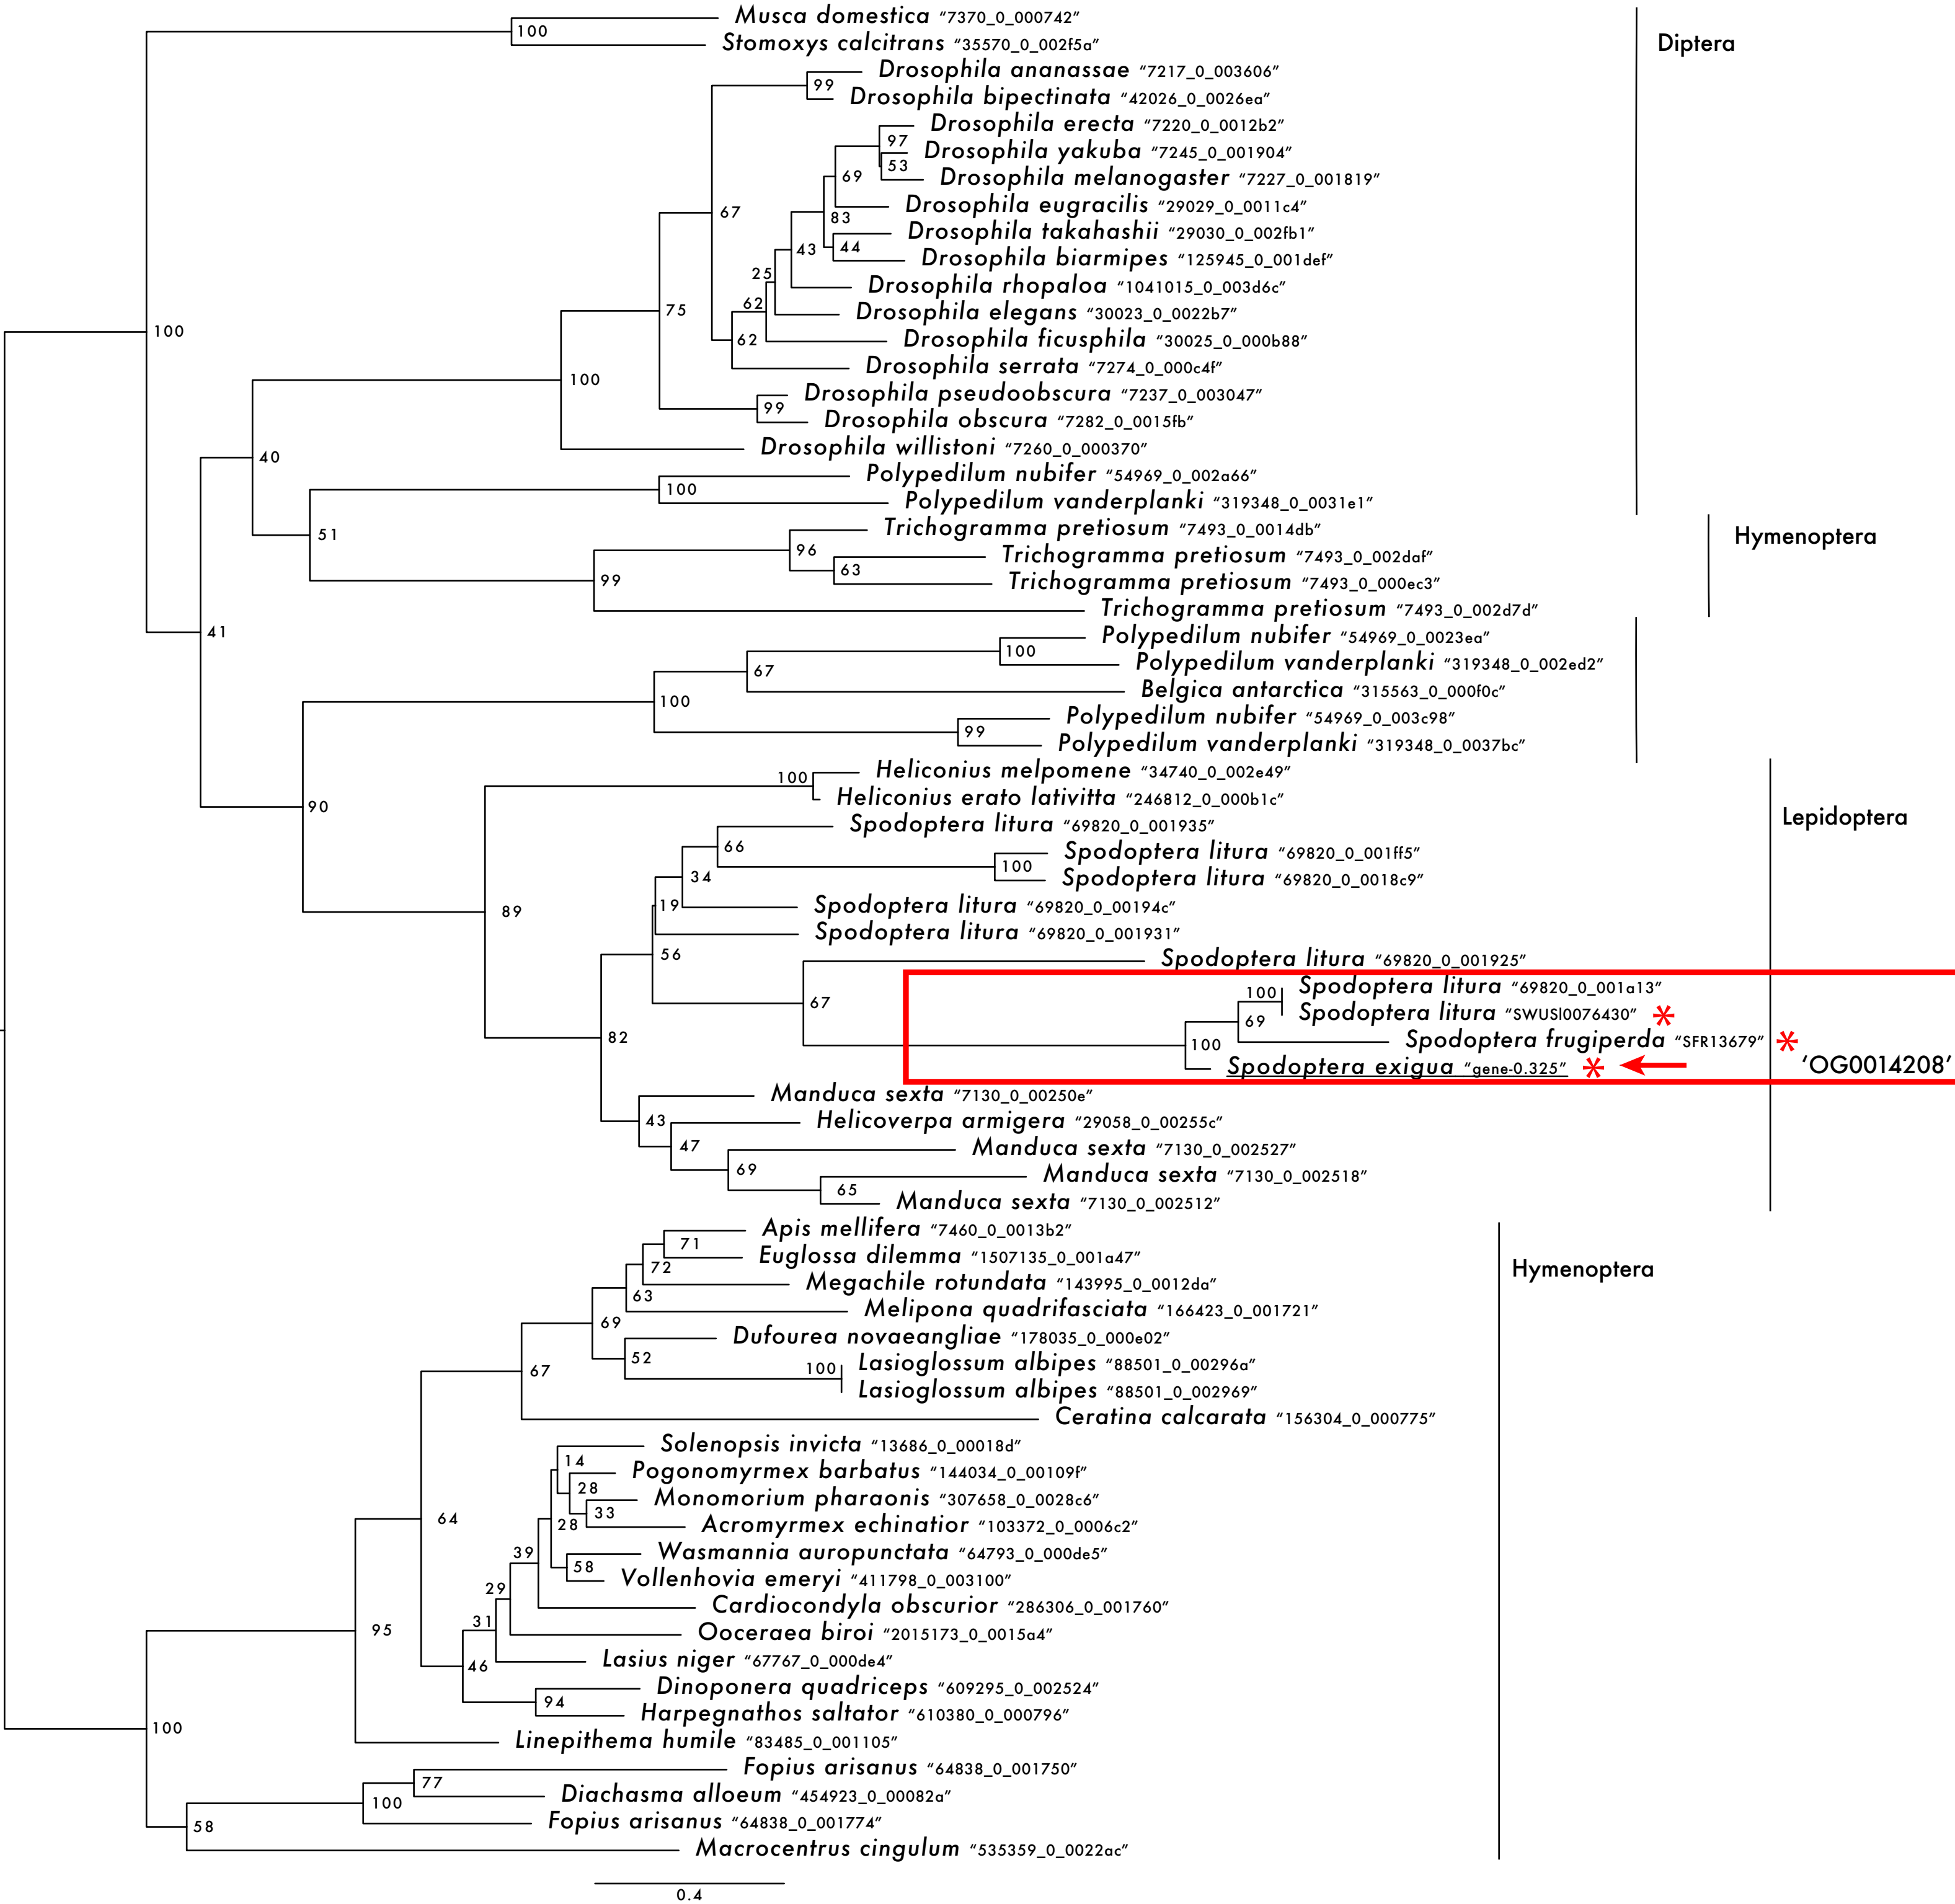

Supplement: Supplementary file 1 [file 1]

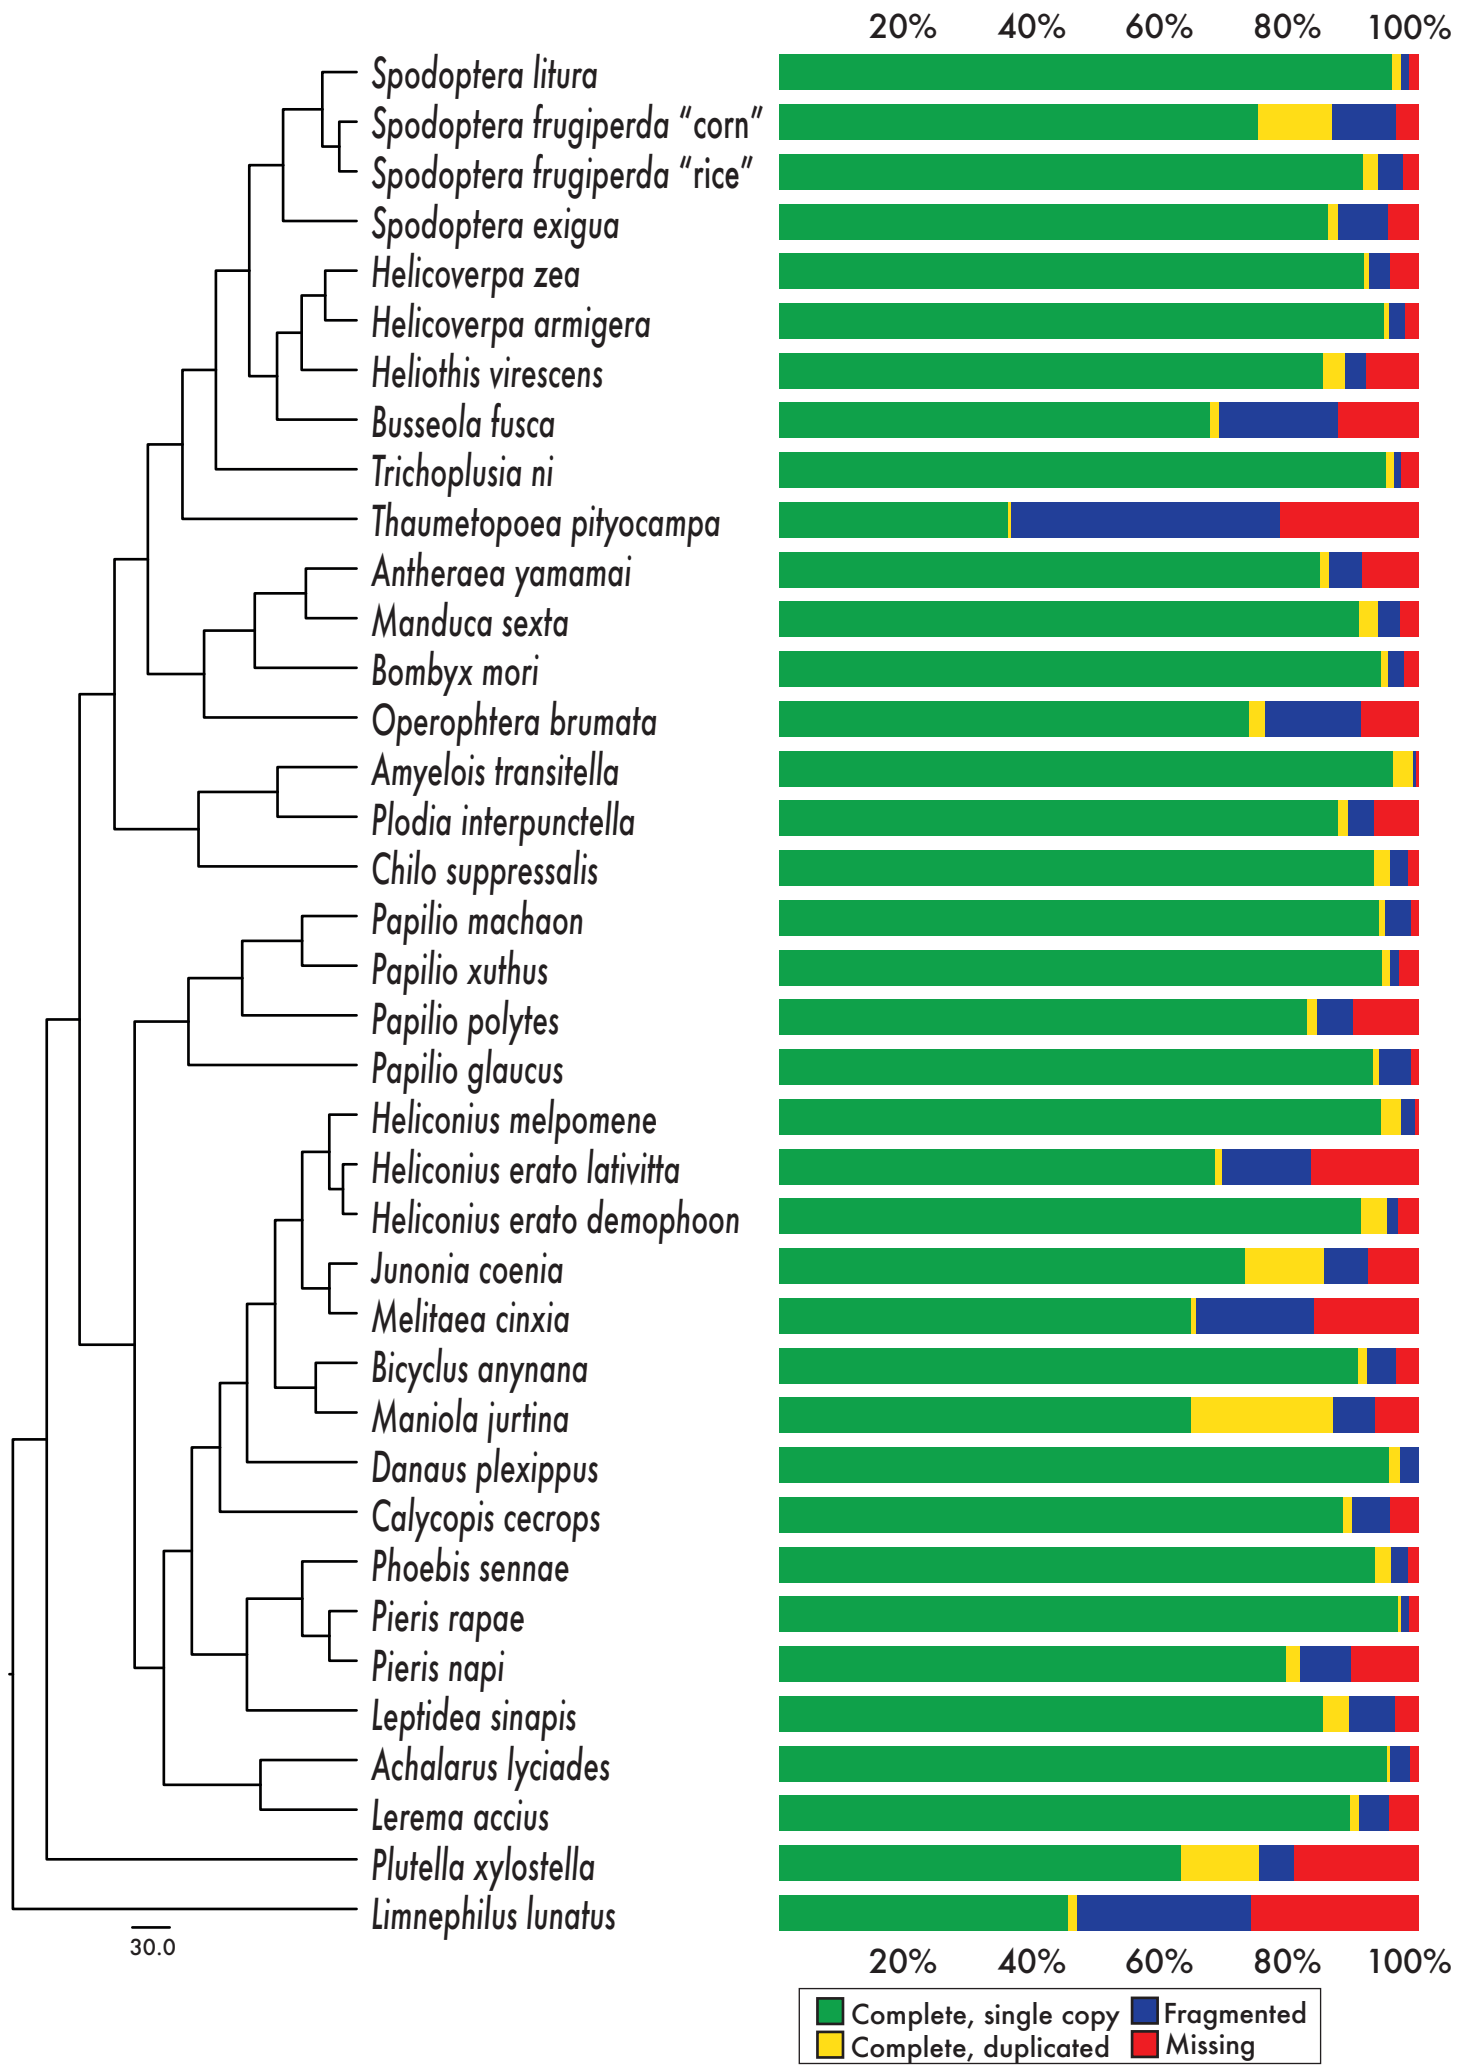

Supplement: Supplementary file 3 [file 1]

Color Key

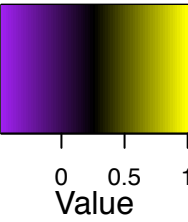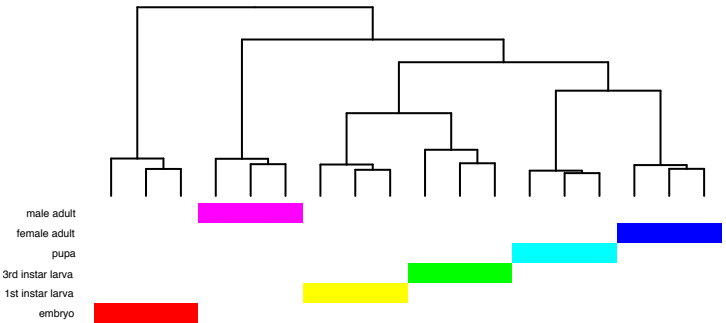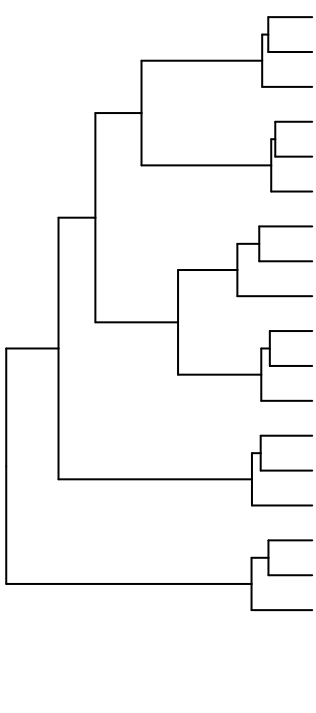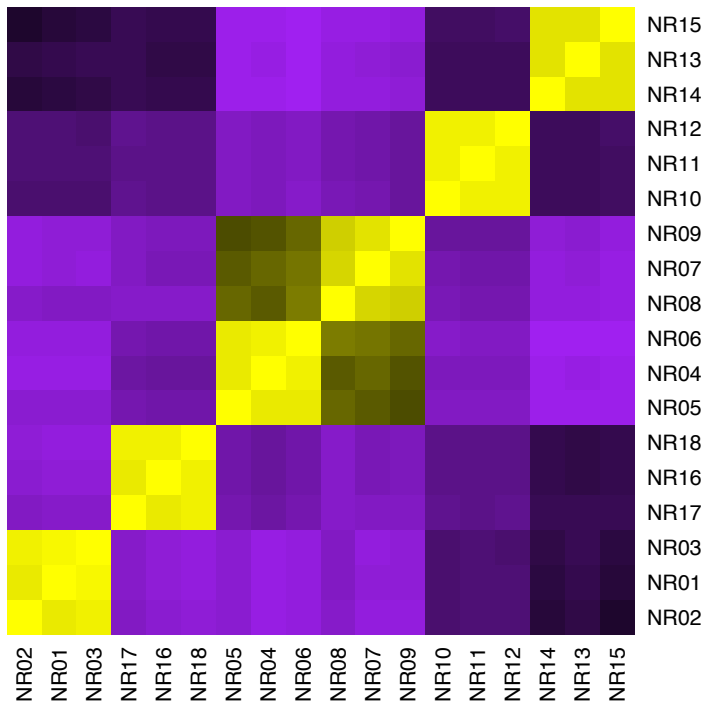

Supplement: Supplementary file 4 [file 1]

Group III βREPAT

Group IV βREPAT

Group VI βREPAT

Group V βREPAT

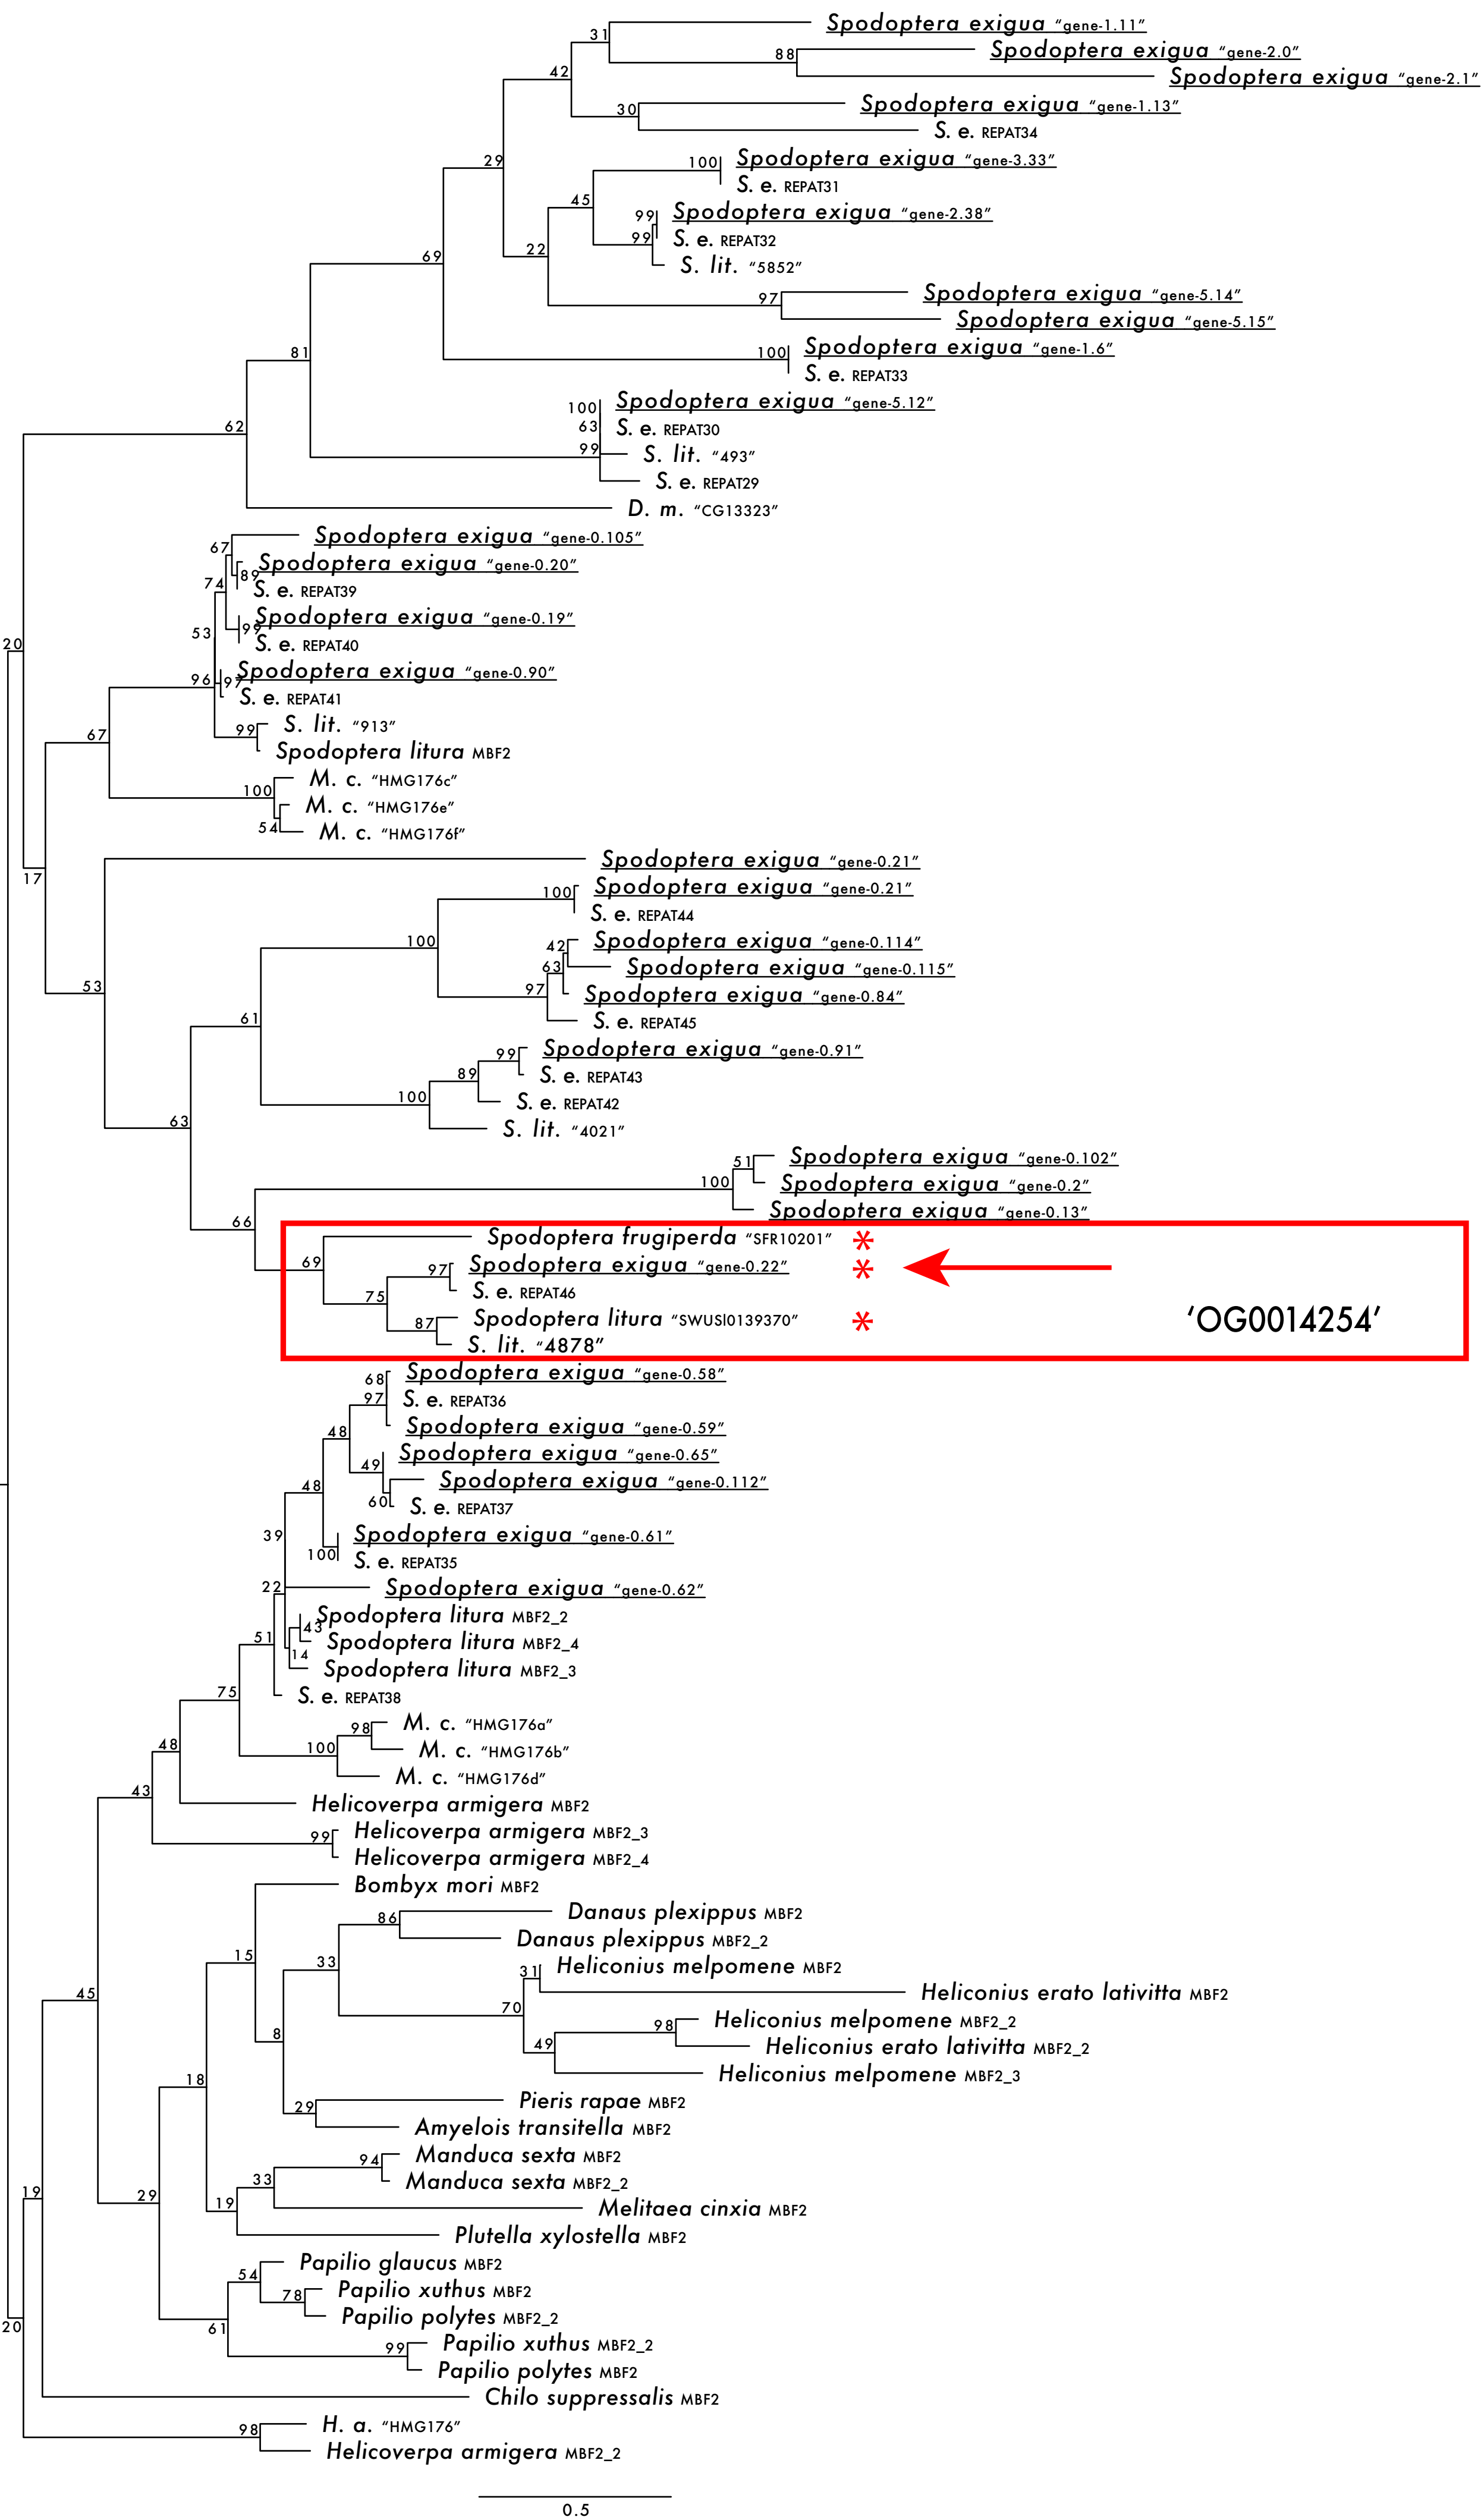

Supplement: Supplementary file 5 [file 1]

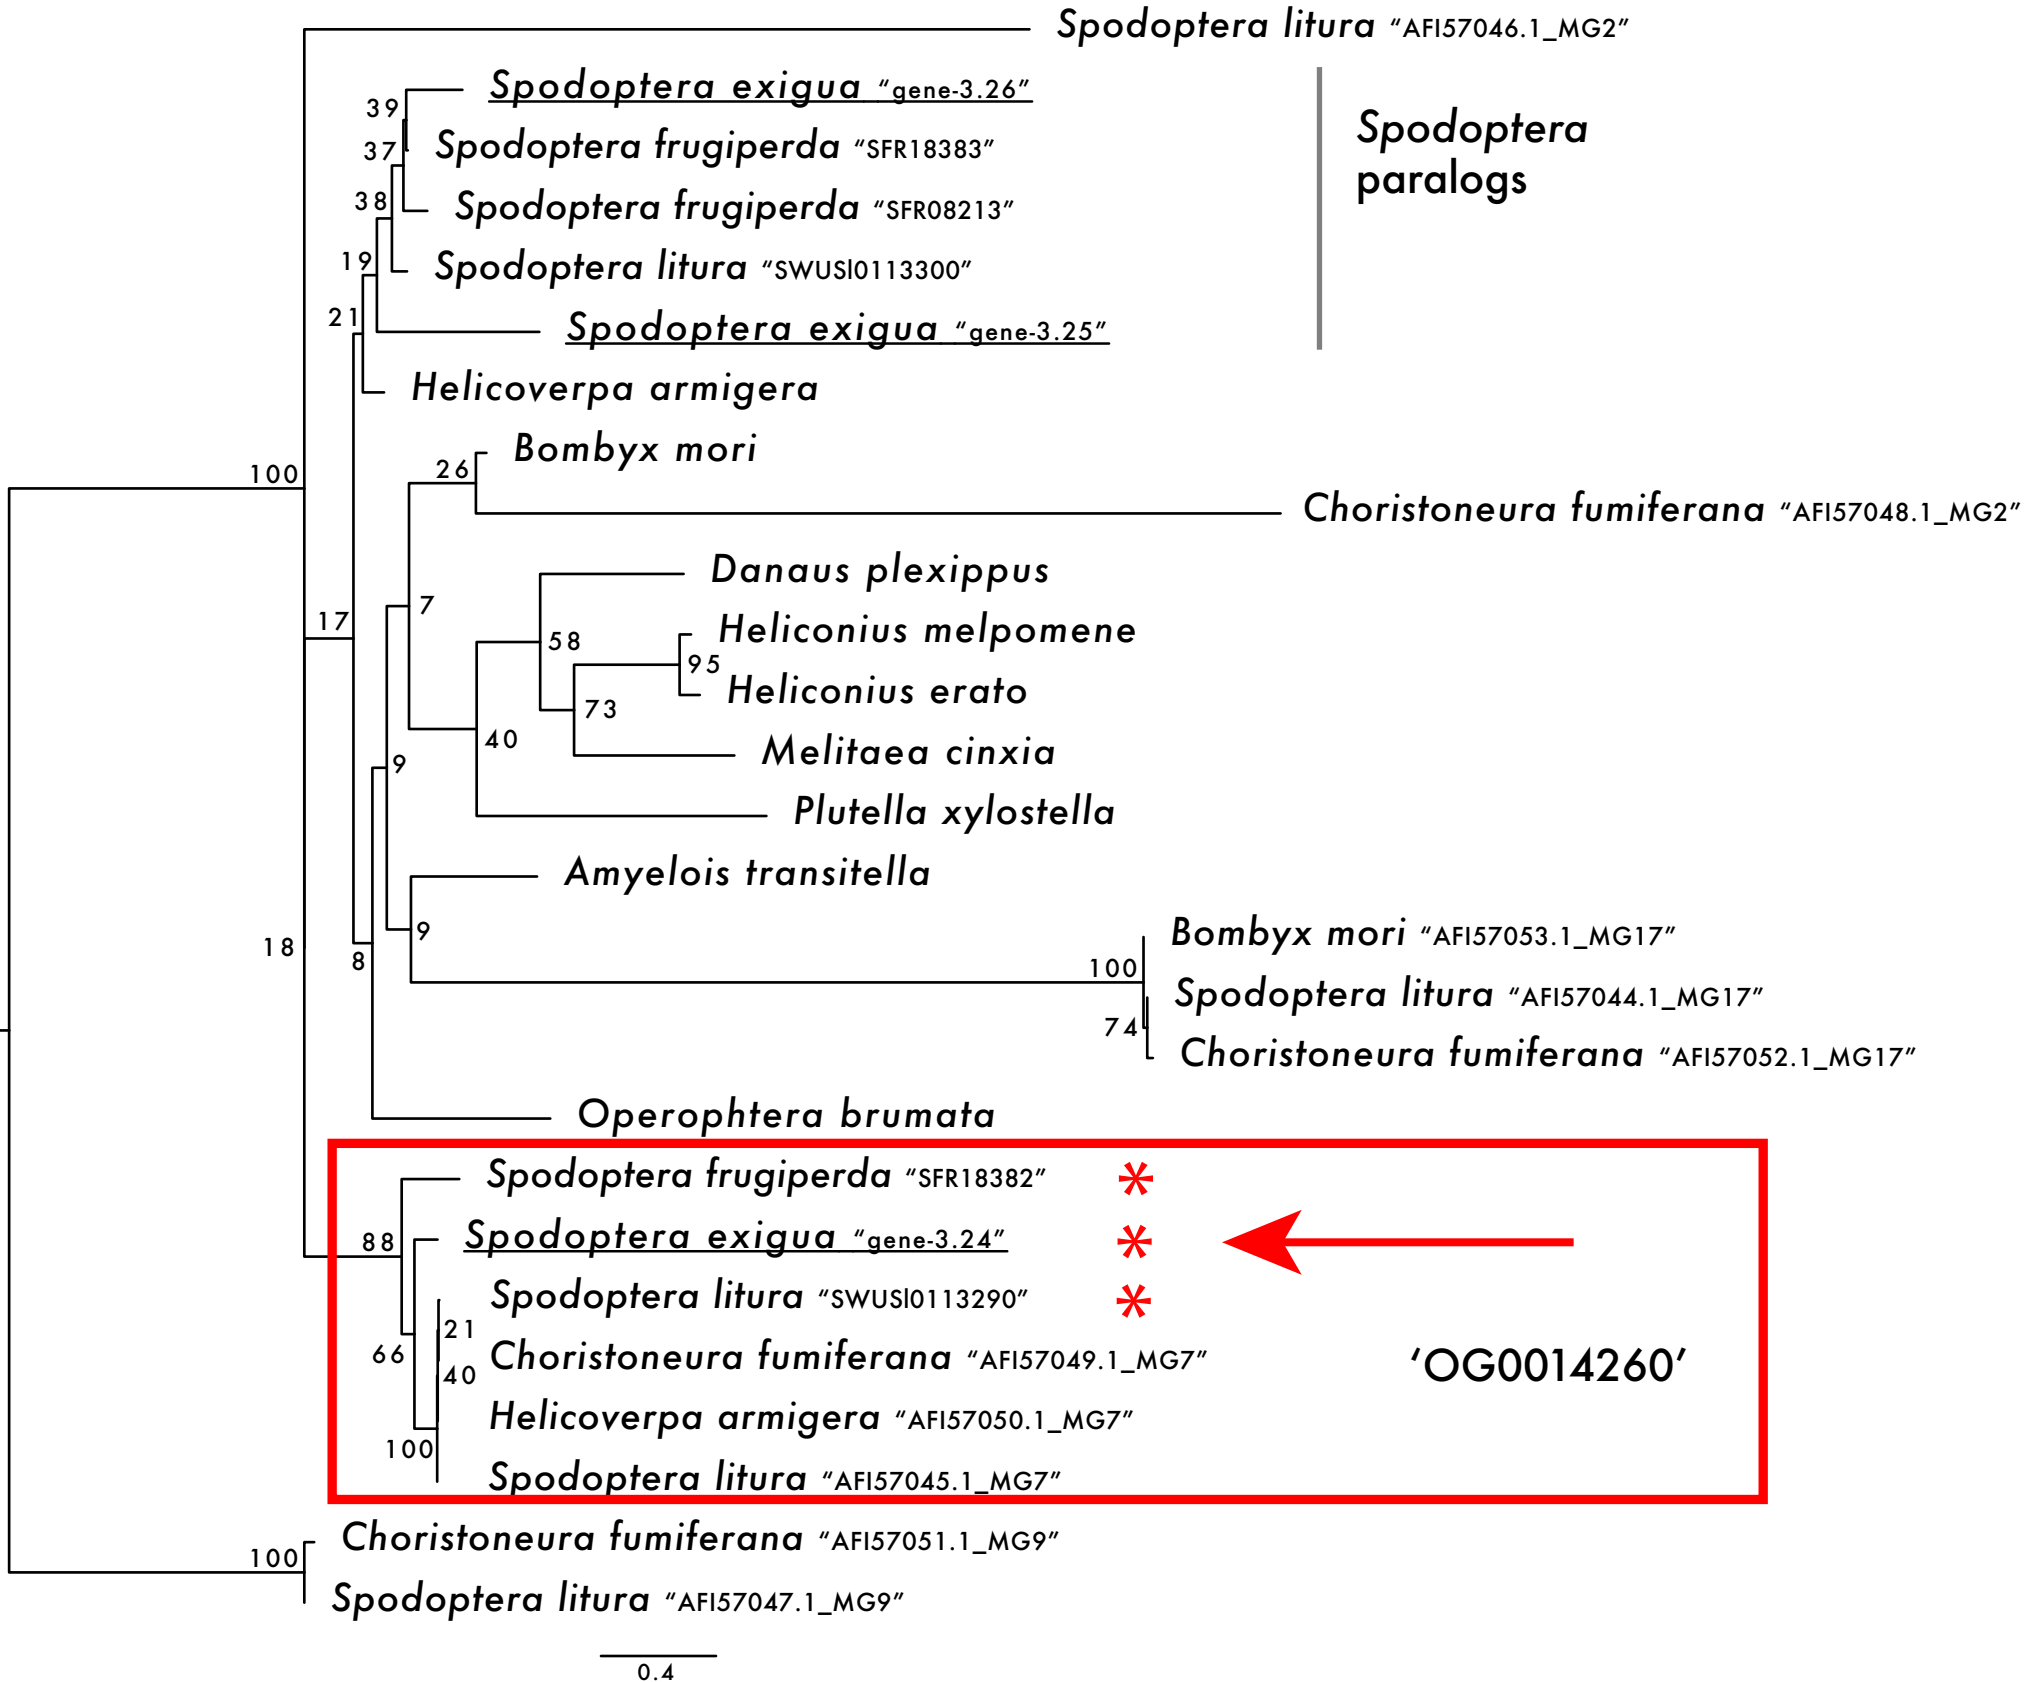

Supplement: Supplementary file 6 [file 1]

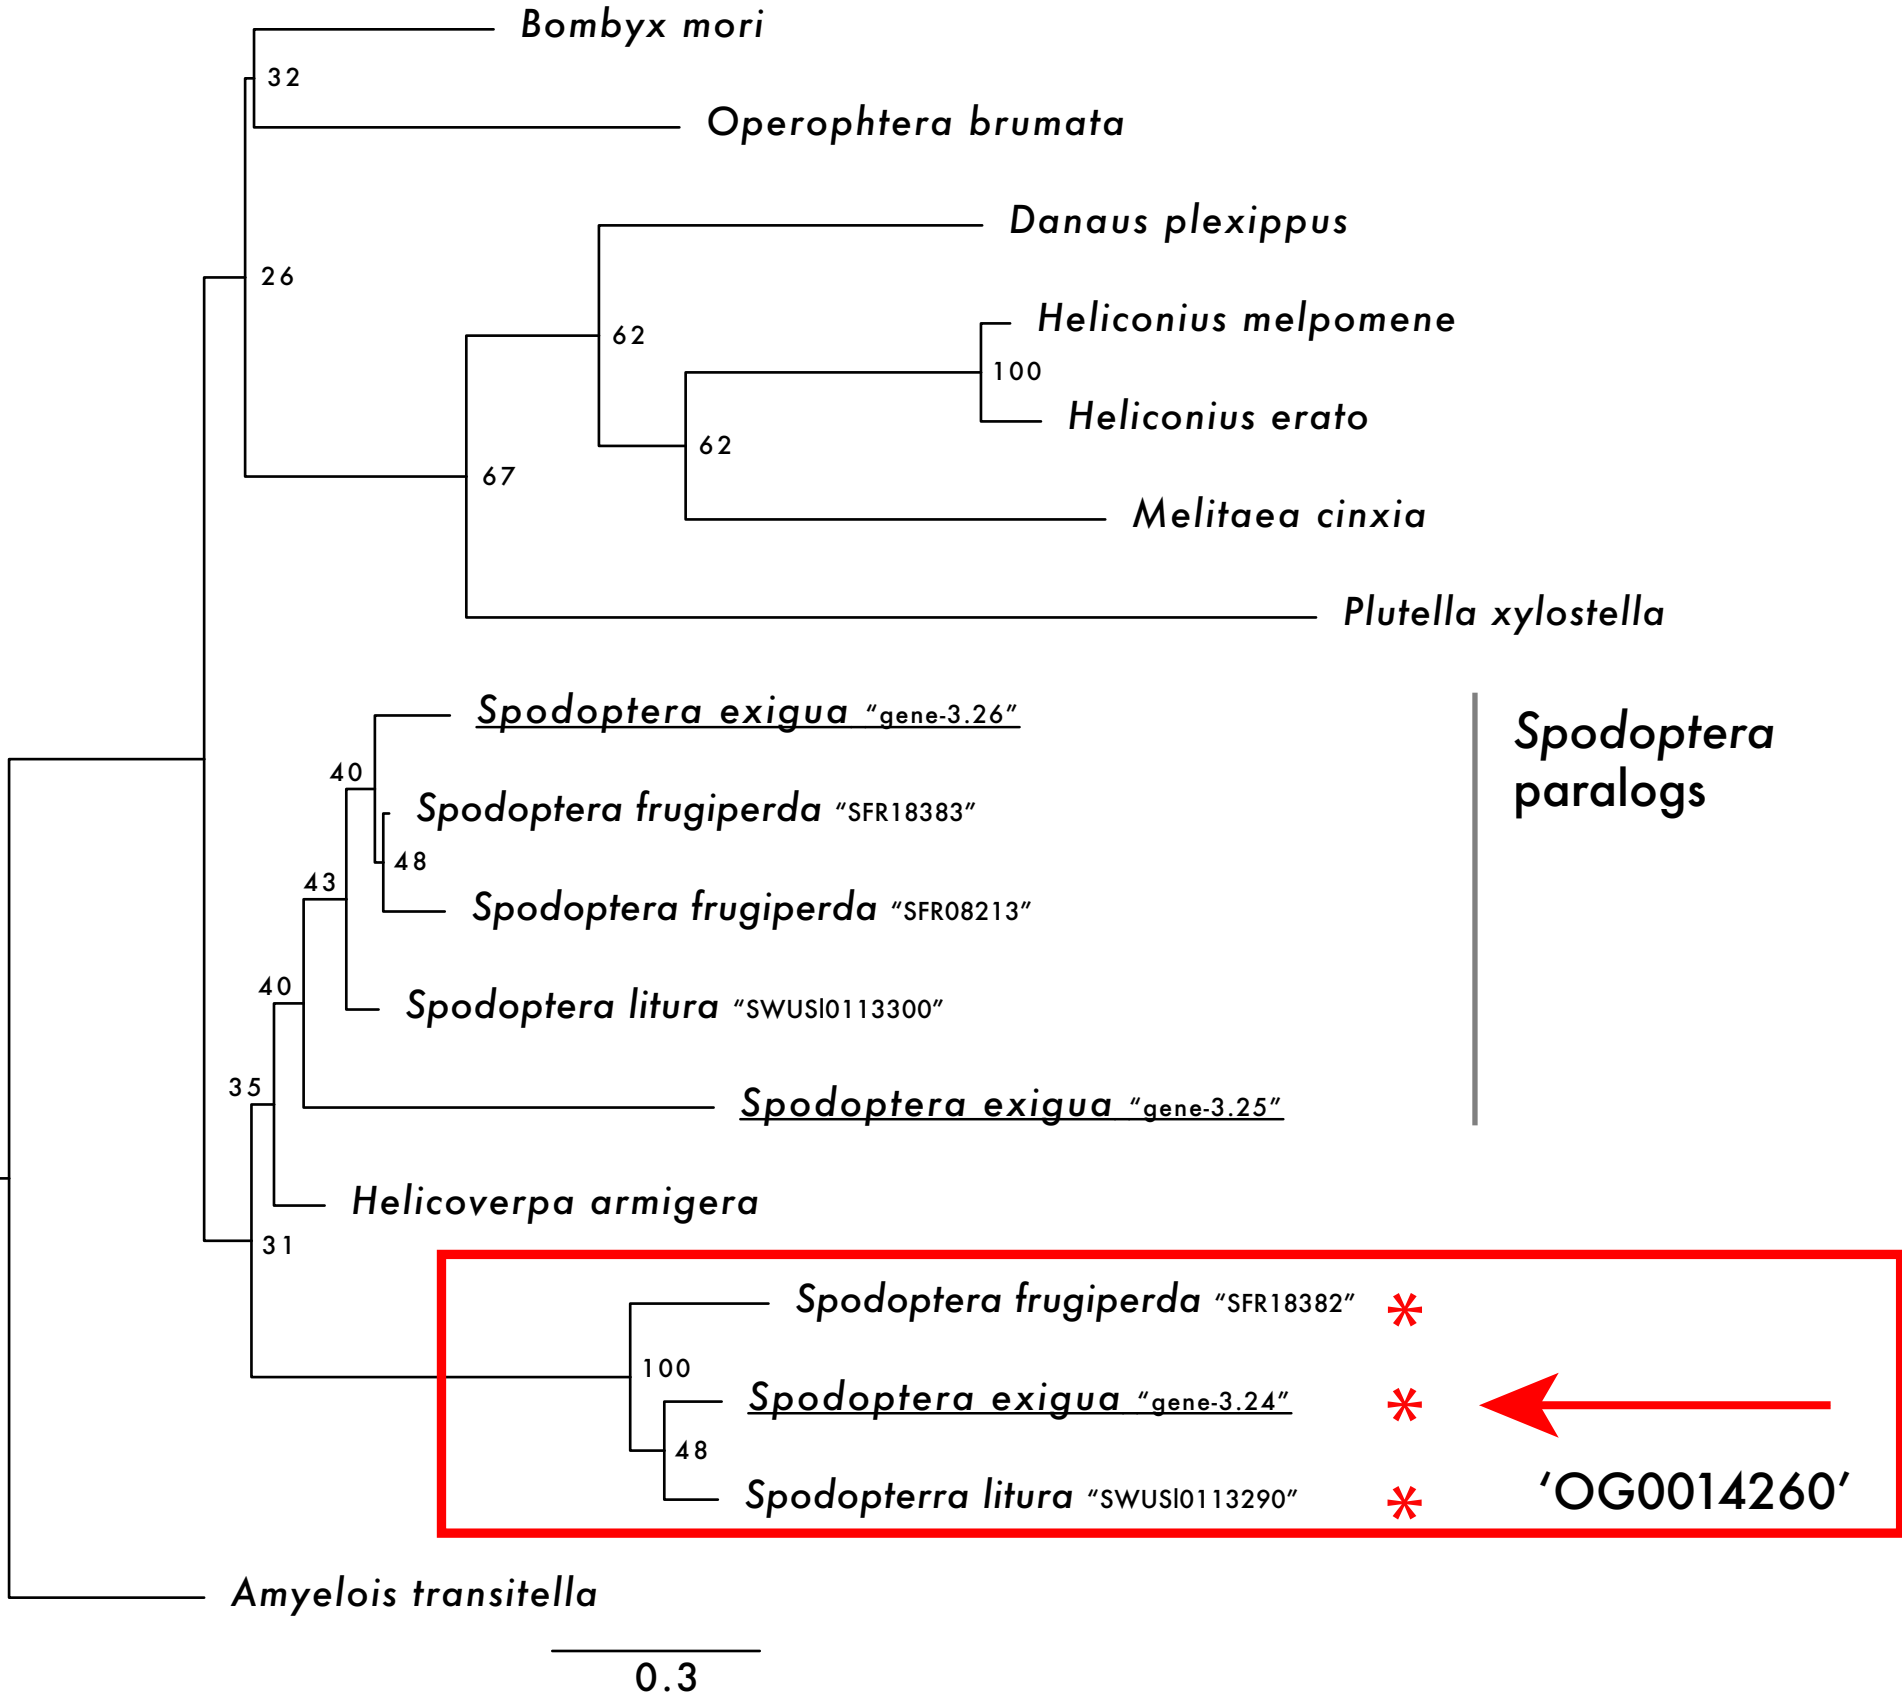

Supplement: Supplementary file 7 [file 1]

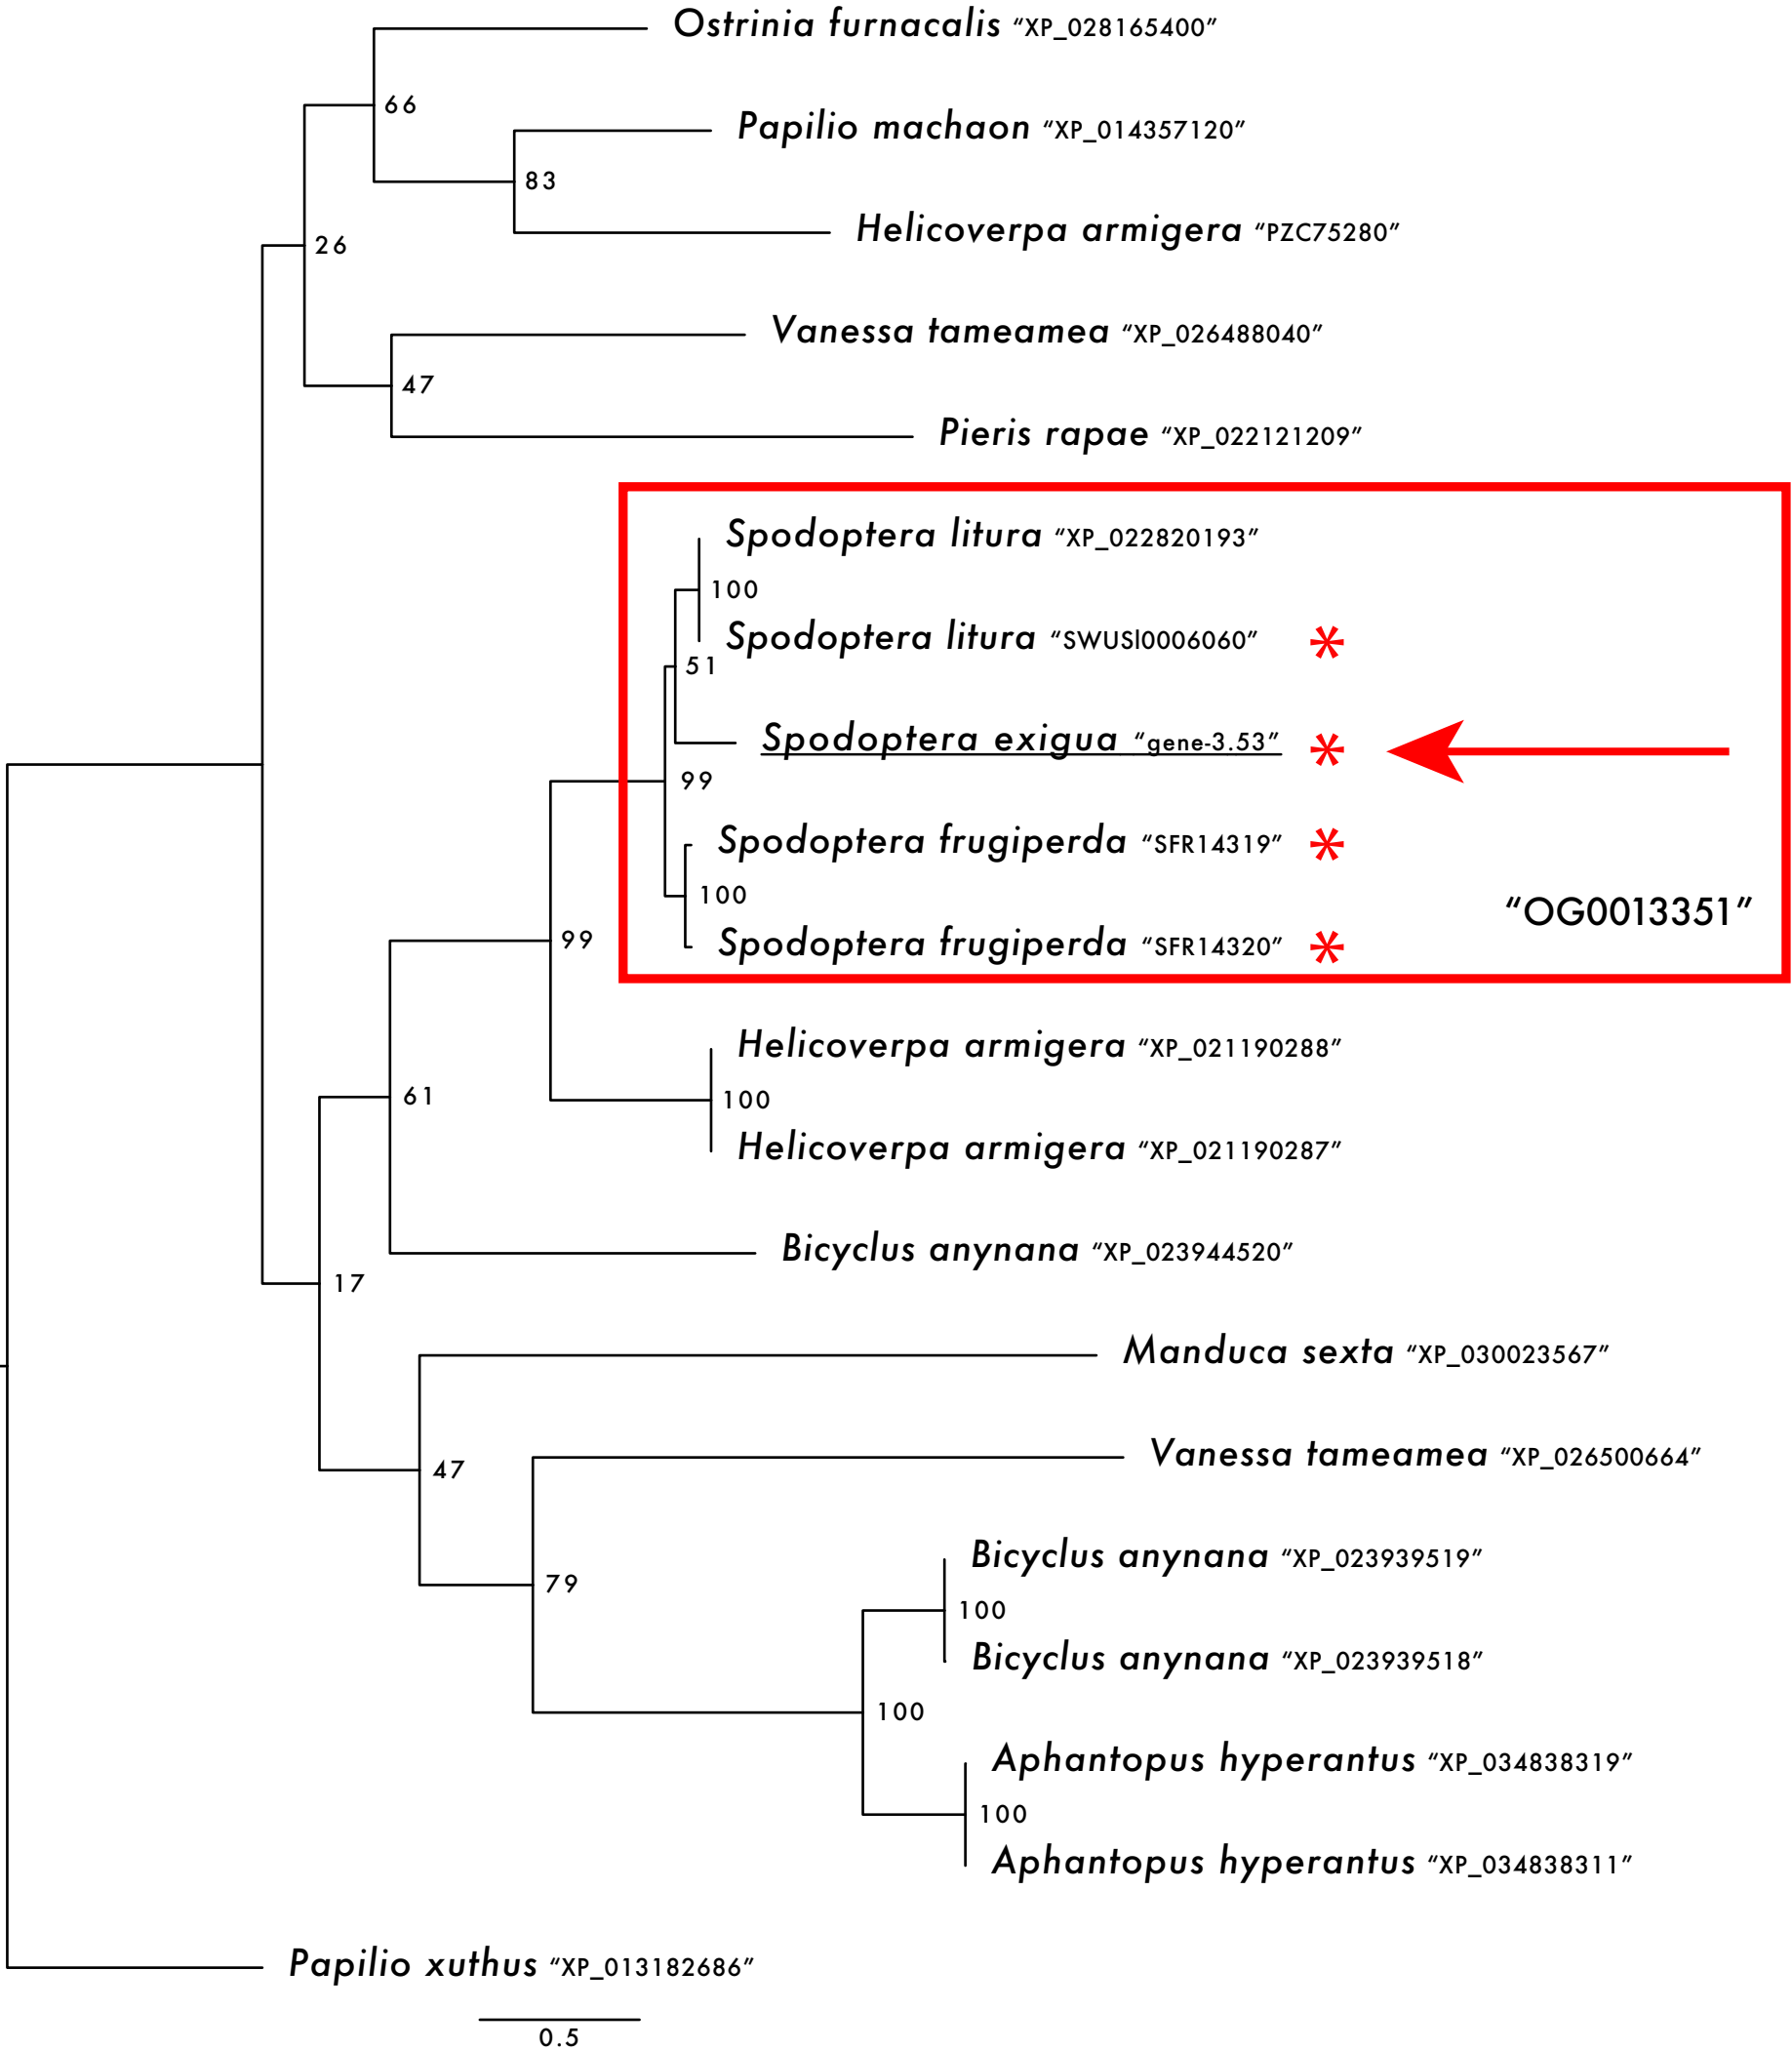

Supplement: Supplementary file 8 [file 1]

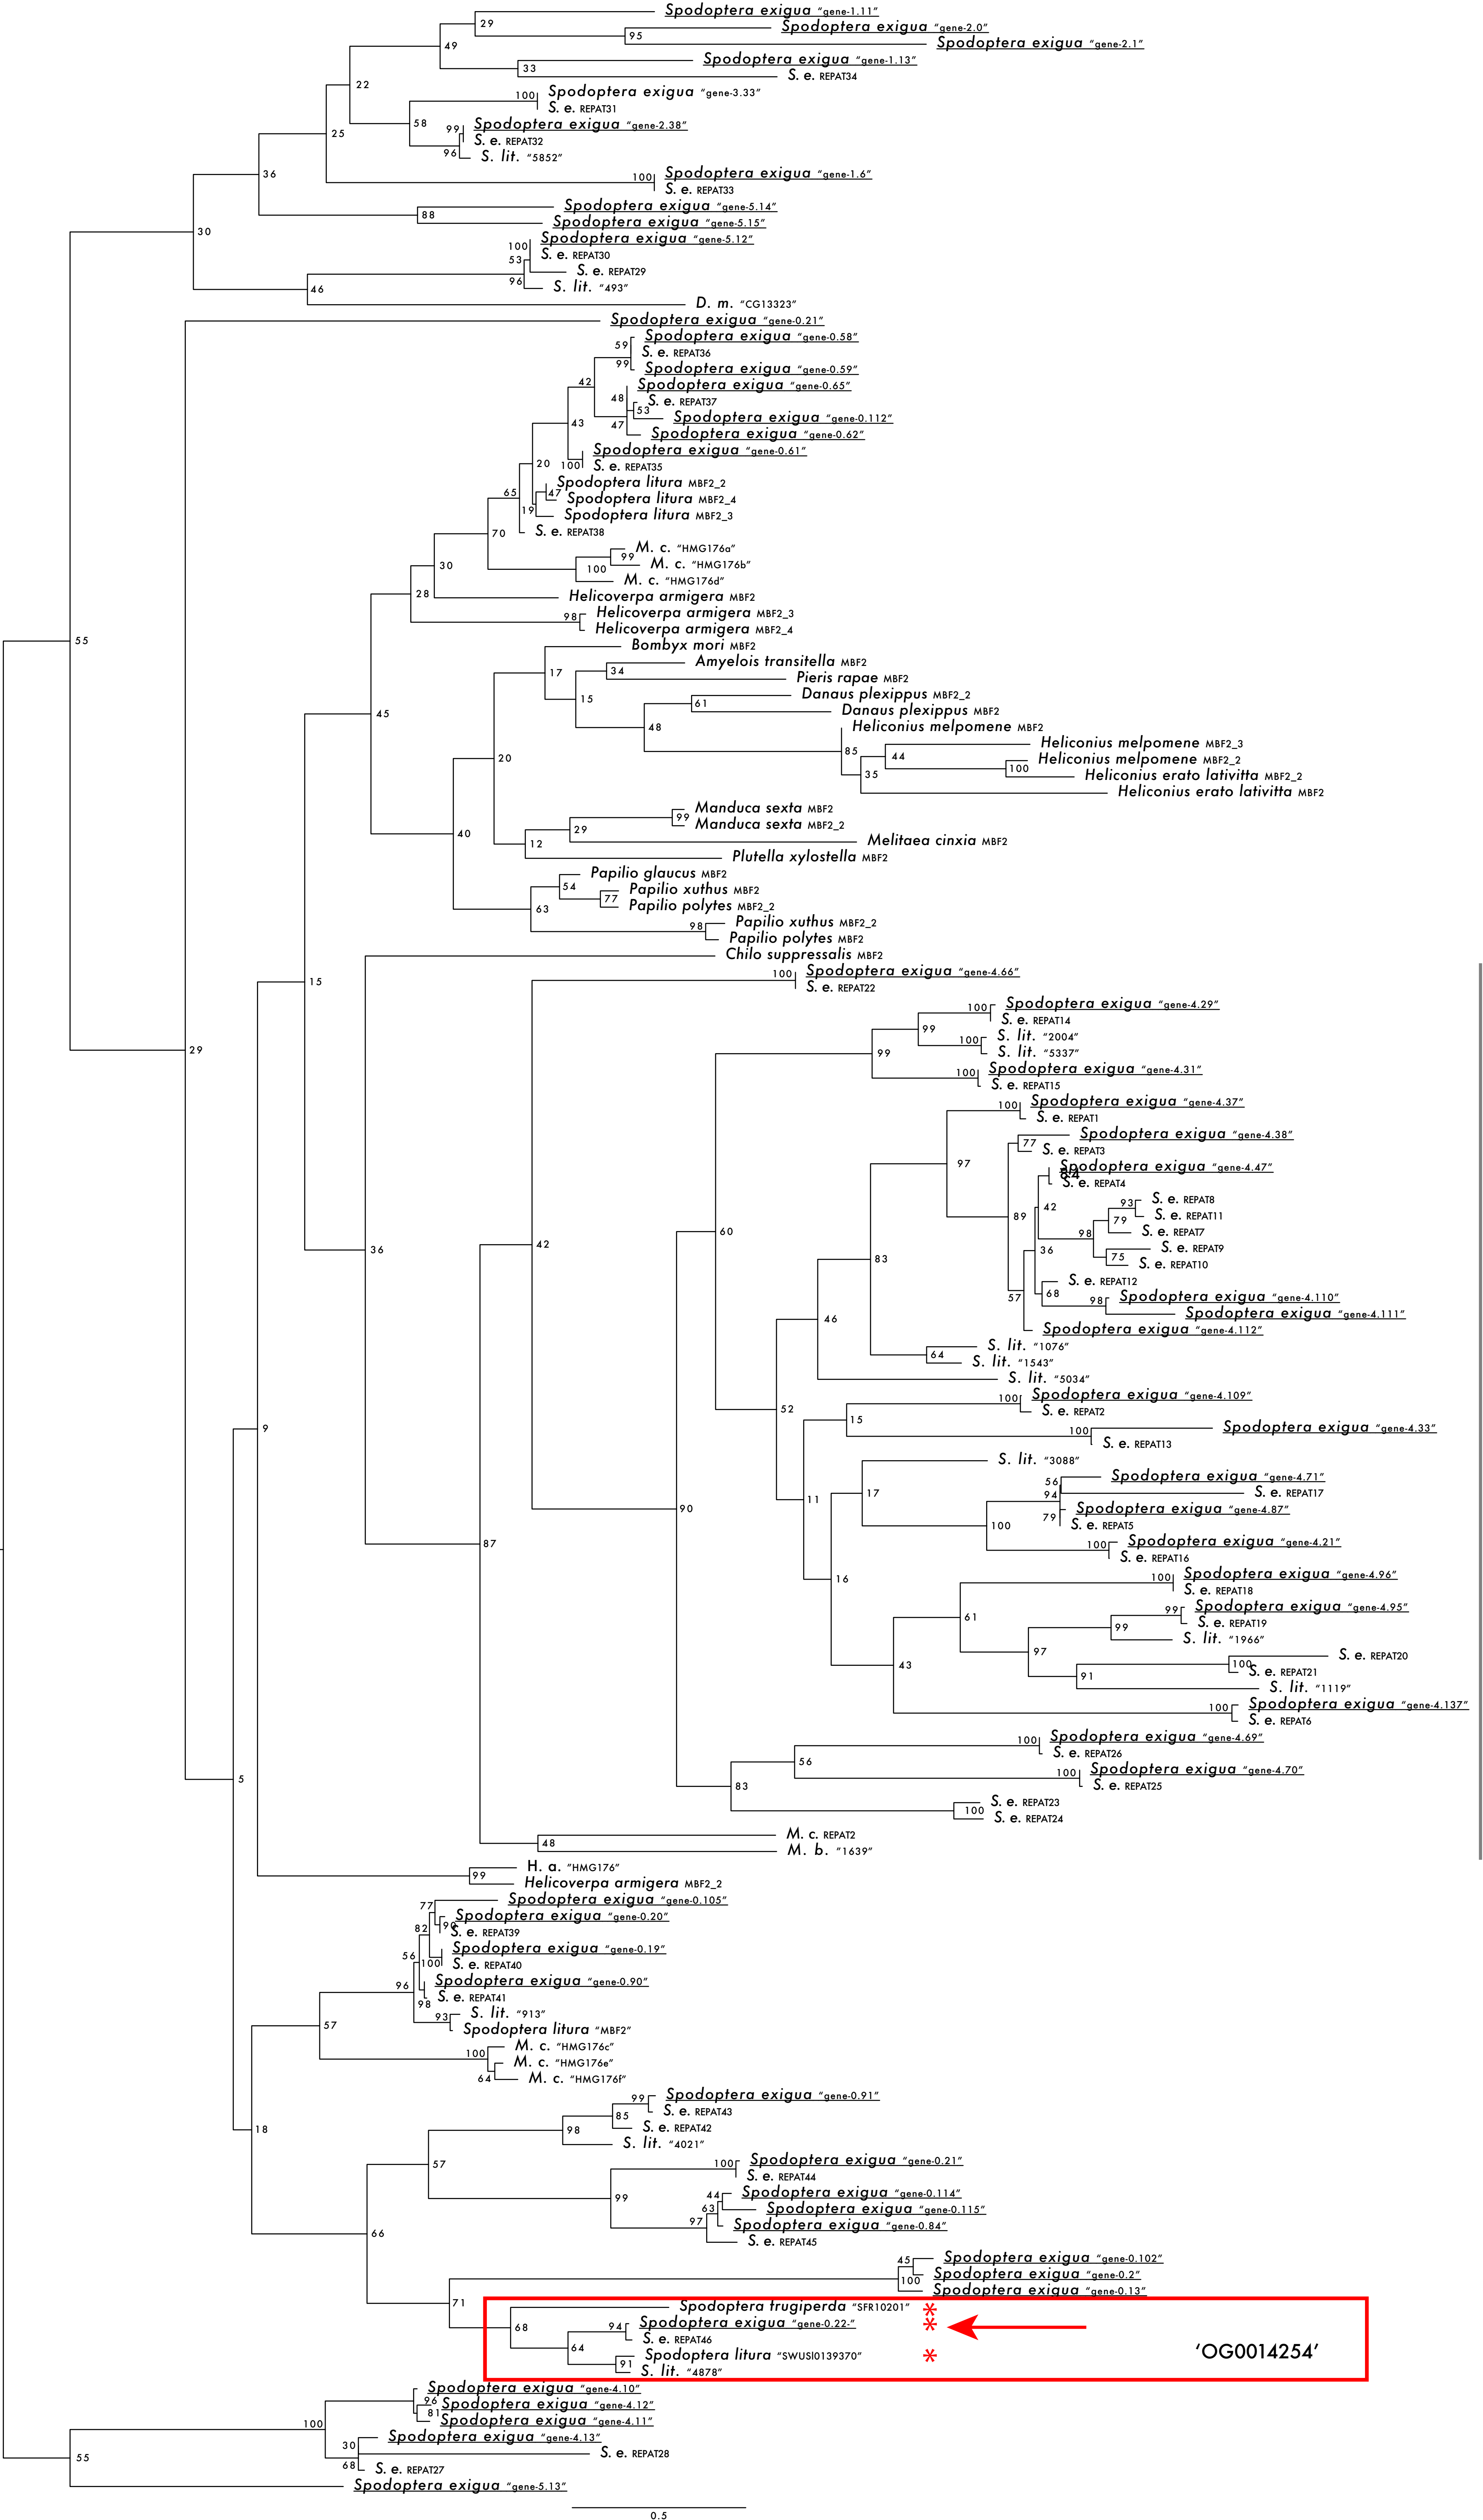

aREPAT class

‘OG0014254’

Supplement: Supplementary file 9 [file 1]

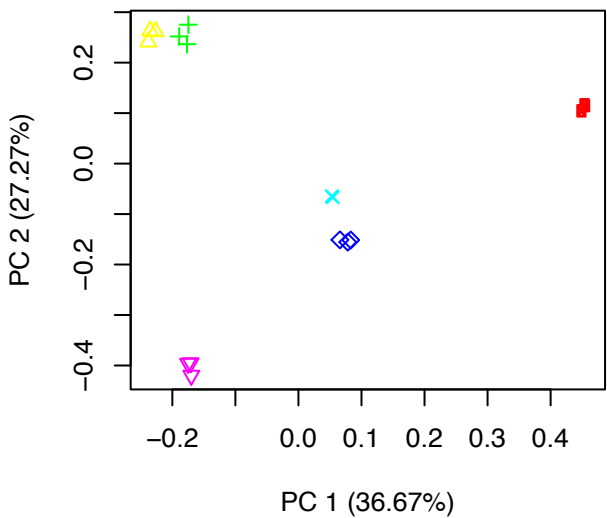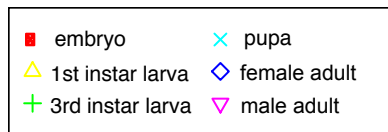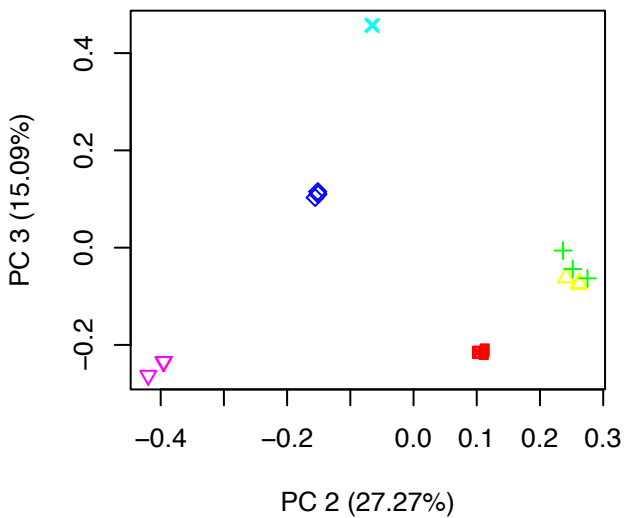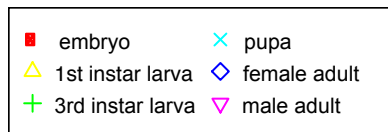

Supplement: Supplementary file 10 [file 1]
